# Supplementary material
Source: Elsevier journal article supplement (https://univ-rennes.hal.science/hal-01532174v1/file/mmc4.zip)
Supplement: mmc4 [file mmc4.zip]

Archive with 2 entries (2 files):
- Complex_7.cif
- CHECKCIF-complex_7.pdf
