# Supplementary material
Source: Elsevier journal article supplement (https://univ-rennes.hal.science/hal-01532174v1/file/mmc4.zip)
Supplement: mmc4 [file mmc4.zip › Complex_7.cif]

data_abs
_audit_creation_date              2016-08-14
_audit_creation_method
;
Olex2 1.2
(compiled 2016.02.19 svn.r3266 for OlexSys, GUI svn.r5155)
;
_publ_contact_author_address      ?
_publ_contact_author_email        ?
_publ_contact_author_name         ''
_publ_contact_author_phone        ?
_publ_section_references
;
Dolomanov, O.V., Bourhis, L.J., Gildea, R.J, Howard, J.A.K. & Puschmann, H.
 (2009), J. Appl. Cryst. 42, 339-341.

Sheldrick, G.M. (2008). Acta Cryst. A64, 112-122.
;
_chemical_name_common             ?
_chemical_name_systematic
;
 ? 
;
_chemical_formula_moiety          'C28 H24 Cu Fe N2 O3, C H4 O'
_chemical_formula_sum             'C29 H28 Cu Fe N2 O4'
_chemical_formula_weight          587.92
_chemical_melting_point           ?
loop_
  _atom_type_symbol
  _atom_type_description
  _atom_type_scat_dispersion_real
  _atom_type_scat_dispersion_imag
  _atom_type_scat_source
 'C' 'C' 0.0033 0.0016 'International Tables Vol C Tables 4.2.6.8 and 6.1.1.4'
 'H' 'H' 0.0000 0.0000 'International Tables Vol C Tables 4.2.6.8 and 6.1.1.4'
 'Cu' 'Cu' 0.3201 1.2651 'International Tables Vol C Tables 4.2.6.8 and 6.1.1.4'
 'Fe' 'Fe' 0.3463 0.8444 'International Tables Vol C Tables 4.2.6.8 and 6.1.1.4'
 'N' 'N' 0.0061 0.0033 'International Tables Vol C Tables 4.2.6.8 and 6.1.1.4'
 'O' 'O' 0.0106 0.0060 'International Tables Vol C Tables 4.2.6.8 and 6.1.1.4'

_space_group_crystal_system       'monoclinic'
_space_group_IT_number            14
_space_group_name_H-M_alt         'P 1 21/c 1'
_space_group_name_Hall            '-P 2ybc'
loop_
  _space_group_symop_id
  _space_group_symop_operation_xyz
 1 'x, y, z'
 2 '-x, y+1/2, -z+1/2'
 3 '-x, -y, -z'
 4 'x, -y-1/2, z-1/2'

_cell_length_a                    13.329(3)
_cell_length_b                    24.948(5)
_cell_length_c                    7.4866(16)
_cell_angle_alpha                 90.00
_cell_angle_beta                  97.244(7)
_cell_angle_gamma                 90.00
_cell_volume                      2469.7(9)
_cell_formula_units_Z             4
_cell_measurement_reflns_used     9690
_cell_measurement_temperature     296(2)
_cell_measurement_theta_max       26.33
_cell_measurement_theta_min       2.86
_exptl_absorpt_coefficient_mu     1.488
_exptl_absorpt_correction_T_max   0.9274
_exptl_absorpt_correction_T_min   0.7579
_exptl_absorpt_correction_type    numerical
_exptl_absorpt_process_details
'SADABS-2014/5 (Bruker,2014/5) was used for absorption correction. wR2(int) was 0.0608 before and 0.0555 after correction. The Ratio of minimum to maximum transmission is 0.8172. The \l/2 correction factor is 0.00150.'
_exptl_crystal_colour             'clear dark orange'
_exptl_crystal_colour_lustre      clear
_exptl_crystal_colour_modifier    dark
_exptl_crystal_colour_primary     orange
_exptl_crystal_density_diffrn     1.581
_exptl_crystal_density_meas       .
_exptl_crystal_density_method     'not measured'
_exptl_crystal_description        plate
_exptl_crystal_F_000              1212
_exptl_crystal_size_max           0.258
_exptl_crystal_size_mid           0.099
_exptl_crystal_size_min           0.089
_exptl_special_details
;
 ? 
;
_diffrn_reflns_av_R_equivalents   0.0582
_diffrn_reflns_av_unetI/netI      0.0192
_diffrn_reflns_limit_h_max        16
_diffrn_reflns_limit_h_min        -16
_diffrn_reflns_limit_k_max        31
_diffrn_reflns_limit_k_min        -31
_diffrn_reflns_limit_l_max        9
_diffrn_reflns_limit_l_min        -9
_diffrn_reflns_number             98839
_diffrn_reflns_theta_full         26.42
_diffrn_reflns_theta_max          26.42
_diffrn_reflns_theta_min          2.24
_diffrn_ambient_temperature       296.15
_diffrn_detector_area_resol_mean  ?
_diffrn_measured_fraction_theta_full 0.997
_diffrn_measured_fraction_theta_max 0.997
_diffrn_measurement_device_type   'Bruker APEX-II CCD'
_diffrn_measurement_method        '\f and \w scans'
_diffrn_radiation_monochromator   'graphite'
_diffrn_radiation_type            MoK\a
_diffrn_radiation_wavelength      0.71073
_diffrn_source                    'fine-focus sealed tube'
_diffrn_standards_decay_%         ?
_diffrn_standards_interval_count  ?
_diffrn_standards_interval_time   ?
_diffrn_standards_number          0
_reflns_number_gt                 4163
_reflns_number_total              5066
_reflns_threshold_expression      >2sigma(I)
_computing_cell_refinement        'SAINT v8.27A (Bruker, 2012)'
_computing_data_collection        ?
_computing_data_reduction         'SAINT v8.27A (Bruker, 2012)'
_computing_molecular_graphics     'Olex2 (Dolomanov et al., 2009)'
_computing_publication_material   'Olex2 (Dolomanov et al., 2009)'
_computing_structure_refinement   'XH (Sheldrick, 2008)'
_computing_structure_solution     'XS (Sheldrick, 2008)'
_refine_diff_density_max          0.305
_refine_diff_density_min          -0.224
_refine_diff_density_rms          0.057
_refine_ls_extinction_coef        ?
_refine_ls_extinction_method      none
_refine_ls_goodness_of_fit_ref    1.079
_refine_ls_hydrogen_treatment     constr
_refine_ls_matrix_type            full
_refine_ls_number_parameters      338
_refine_ls_number_reflns          5066
_refine_ls_number_restraints      0
_refine_ls_R_factor_all           0.0430
_refine_ls_R_factor_gt            0.0294
_refine_ls_restrained_S_all       1.079
_refine_ls_shift/su_max           0.001
_refine_ls_shift/su_mean          0.000
_refine_ls_structure_factor_coef  Fsqd
_refine_ls_weighting_details
'calc w=1/[\s^2^(Fo^2^)+(0.0311P)^2^+1.3981P] where P=(Fo^2^+2Fc^2^)/3'
_refine_ls_weighting_scheme       calc
_refine_ls_wR_factor_gt           0.0650
_refine_ls_wR_factor_ref          0.0699
_refine_special_details
;
 Refinement of F^2^ against ALL reflections.  The weighted R-factor wR and 
 goodness of fit S are based on F^2^, conventional R-factors R are based 
 on F, with F set to zero for negative F^2^. The threshold expression of 
 F^2^ > 2sigma(F^2^) is used only for calculating R-factors(gt) etc. and is 
 not relevant to the choice of reflections for refinement.  R-factors based 
 on F^2^ are statistically about twice as large as those based on F, and R- 
 factors based on ALL data will be even larger. 
;
_olex2_refinement_description
;
1. Fixed Uiso
 At 1.2 times of:
  All C(H) groups
 At 1.5 times of:
  All C(H,H,H) groups, All O(H) groups
2.a Aromatic/amide H refined with riding coordinates:
 C1(H1), C2(H2), C3(H3), C4(H4), C5(H5), C6(H6), C7(H7), C8(H8), C9(H9),
 C12(H12), C16(H16), C17(H17), C18(H18), C19(H19), C21(H21), C24(H24), C25(H25),
  C27(H27)
2.b Idealised Me refined as rotating group:
 C14(H14A,H14B,H14C), C28(H28A,H28B,H28C), C29(H29A,H29B,H29C)
2.c Idealised tetrahedral OH refined as rotating group:
 O4(H4A)
;
_atom_sites_solution_hydrogens    geom
_atom_sites_solution_primary      direct
_atom_sites_solution_secondary    difmap
loop_
  _atom_site_label
  _atom_site_type_symbol
  _atom_site_fract_x
  _atom_site_fract_y
  _atom_site_fract_z
  _atom_site_U_iso_or_equiv
  _atom_site_adp_type
  _atom_site_occupancy
  _atom_site_calc_flag
  _atom_site_disorder_assembly
  _atom_site_disorder_group
  _atom_site_refinement_flags_posn
 Cu1 Cu 0.167160(18) 0.590396(10) 0.71072(3) 0.02762(8) Uani 1 d . . .
 Fe1 Fe 0.56908(2) 0.639701(11) 1.00395(4) 0.02599(8) Uani 1 d . . .
 O1 O 0.30893(11) 0.58926(6) 0.7835(2) 0.0352(4) Uani 1 d . . .
 O2 O 0.16740(11) 0.51579(6) 0.7705(2) 0.0360(4) Uani 1 d . . .
 O3 O -0.15157(14) 0.38191(7) 0.8644(3) 0.0583(5) Uani 1 d . . .
 N1 N 0.16604(13) 0.66288(7) 0.6094(2) 0.0280(4) Uani 1 d . . .
 N2 N 0.02243(13) 0.59417(7) 0.6539(2) 0.0281(4) Uani 1 d . . .
 C1 C 0.5741(2) 0.71932(10) 1.0617(4) 0.0510(7) Uani 1 d . . .
 H1 H 0.5743 0.7469 0.9783 0.061 Uiso 1 calc . . R
 C2 C 0.6603(2) 0.69323(10) 1.1516(3) 0.0469(6) Uani 1 d . . .
 H2 H 0.7273 0.7007 1.1380 0.056 Uiso 1 calc . . R
 C3 C 0.62687(18) 0.65381(10) 1.2658(3) 0.0406(6) Uani 1 d . . .
 H3 H 0.6678 0.6308 1.3405 0.049 Uiso 1 calc . . R
 C4 C 0.52033(18) 0.65556(10) 1.2464(3) 0.0405(6) Uani 1 d . . .
 H4 H 0.4787 0.6338 1.3061 0.049 Uiso 1 calc . . R
 C5 C 0.4879(2) 0.69593(10) 1.1210(4) 0.0469(6) Uani 1 d . . .
 H5 H 0.4212 0.7055 1.0837 0.056 Uiso 1 calc . . R
 C6 C 0.56902(16) 0.63302(10) 0.7338(3) 0.0353(5) Uani 1 d . . .
 H6 H 0.5711 0.6615 0.6541 0.042 Uiso 1 calc . . R
 C7 C 0.65373(17) 0.60584(10) 0.8253(3) 0.0407(6) Uani 1 d . . .
 H7 H 0.7211 0.6132 0.8148 0.049 Uiso 1 calc . . R
 C8 C 0.61838(17) 0.56565(9) 0.9351(3) 0.0396(5) Uani 1 d . . .
 H8 H 0.6584 0.5421 1.0095 0.048 Uiso 1 calc . . R
 C9 C 0.51204(16) 0.56755(8) 0.9122(3) 0.0324(5) Uani 1 d . . .
 H9 H 0.4699 0.5455 0.9698 0.039 Uiso 1 calc . . R
 C10 C 0.47951(15) 0.60888(8) 0.7862(3) 0.0279(4) Uani 1 d . . .
 C11 C 0.37236(15) 0.62222(8) 0.7286(3) 0.0271(4) Uani 1 d . . .
 C12 C 0.34631(16) 0.66587(8) 0.6175(3) 0.0308(5) Uani 1 d . . .
 H12 H 0.3997 0.6851 0.5801 0.037 Uiso 1 calc . . R
 C13 C 0.24859(16) 0.68442(8) 0.5549(3) 0.0296(5) Uani 1 d . . .
 C14 C 0.24464(19) 0.72860(10) 0.4156(3) 0.0434(6) Uani 1 d . . .
 H14A H 0.1873 0.7232 0.3261 0.065 Uiso 1 calc . . GR
 H14B H 0.3055 0.7280 0.3593 0.065 Uiso 1 calc . . GR
 H14C H 0.2386 0.7626 0.4730 0.065 Uiso 1 calc . . GR
 C15 C 0.06618(16) 0.68240(8) 0.5668(3) 0.0294(4) Uani 1 d . . .
 C16 C 0.03720(18) 0.73496(9) 0.5181(3) 0.0393(5) Uani 1 d . . .
 H16 H 0.0865 0.7610 0.5117 0.047 Uiso 1 calc . . R
 C17 C -0.06366(19) 0.74840(10) 0.4796(3) 0.0446(6) Uani 1 d . . .
 H17 H -0.0814 0.7831 0.4427 0.054 Uiso 1 calc . . R
 C18 C -0.13834(18) 0.71117(10) 0.4950(4) 0.0445(6) Uani 1 d . . .
 H18 H -0.2060 0.7206 0.4682 0.053 Uiso 1 calc . . R
 C19 C -0.11230(17) 0.65981(9) 0.5504(3) 0.0386(5) Uani 1 d . . .
 H19 H -0.1626 0.6347 0.5622 0.046 Uiso 1 calc . . R
 C20 C -0.01124(16) 0.64535(8) 0.5888(3) 0.0292(4) Uani 1 d . . .
 C21 C -0.03981(16) 0.55578(9) 0.6757(3) 0.0326(5) Uani 1 d . . .
 H21 H -0.1083 0.5629 0.6450 0.039 Uiso 1 calc . . R
 C22 C -0.01350(16) 0.50340(9) 0.7424(3) 0.0309(5) Uani 1 d . . .
 C23 C 0.08763(16) 0.48563(8) 0.7835(3) 0.0307(5) Uani 1 d . . .
 C24 C 0.10199(18) 0.43195(9) 0.8397(4) 0.0416(6) Uani 1 d . . .
 H24 H 0.1674 0.4184 0.8628 0.050 Uiso 1 calc . . R
 C25 C 0.0215(2) 0.39910(10) 0.8613(4) 0.0467(6) Uani 1 d . . .
 H25 H 0.0335 0.3638 0.8981 0.056 Uiso 1 calc . . R
 C26 C -0.07710(18) 0.41767(9) 0.8290(3) 0.0409(6) Uani 1 d . . .
 C27 C -0.09465(17) 0.46852(9) 0.7669(3) 0.0375(5) Uani 1 d . . .
 H27 H -0.1609 0.4806 0.7401 0.045 Uiso 1 calc . . R
 C28 C -0.2527(2) 0.39916(12) 0.8193(4) 0.0555(7) Uani 1 d . . .
 H28A H -0.2659 0.4049 0.6917 0.083 Uiso 1 calc . . GR
 H28B H -0.2628 0.4320 0.8812 0.083 Uiso 1 calc . . GR
 H28C H -0.2978 0.3723 0.8544 0.083 Uiso 1 calc . . GR
 O4 O 0.27923(14) 0.46379(9) 0.5315(3) 0.0610(5) Uani 1 d . . .
 H4A H 0.2509 0.4786 0.6092 0.092 Uiso 1 calc . . GR
 C29 C 0.3784(2) 0.48320(12) 0.5386(4) 0.0578(8) Uani 1 d . . .
 H29A H 0.4151 0.4618 0.4622 0.087 Uiso 1 calc . . GR
 H29B H 0.4112 0.4813 0.6602 0.087 Uiso 1 calc . . GR
 H29C H 0.3769 0.5197 0.4983 0.087 Uiso 1 calc . . GR

loop_
  _atom_site_aniso_label
  _atom_site_aniso_U_11
  _atom_site_aniso_U_22
  _atom_site_aniso_U_33
  _atom_site_aniso_U_23
  _atom_site_aniso_U_13
  _atom_site_aniso_U_12
 Cu1 0.02263(13) 0.02583(13) 0.03386(15) 0.00352(11) 0.00141(10) -0.00176(10)
 Fe1 0.02360(15) 0.02752(16) 0.02631(16) -0.00140(12) 0.00108(11) -0.00299(12)
 O1 0.0253(7) 0.0351(8) 0.0441(9) 0.0113(7) 0.0008(7) -0.0028(6)
 O2 0.0240(7) 0.0286(8) 0.0558(10) 0.0070(7) 0.0060(7) -0.0013(6)
 O3 0.0450(11) 0.0464(11) 0.0837(15) 0.0153(10) 0.0086(10) -0.0194(9)
 N1 0.0273(9) 0.0268(9) 0.0287(9) 0.0012(7) -0.0016(7) -0.0002(7)
 N2 0.0260(9) 0.0271(9) 0.0307(9) -0.0004(7) 0.0020(7) 0.0001(7)
 C1 0.082(2) 0.0257(12) 0.0439(15) -0.0038(11) 0.0017(14) -0.0064(12)
 C2 0.0476(15) 0.0467(14) 0.0450(15) -0.0106(12) 0.0007(12) -0.0225(12)
 C3 0.0421(13) 0.0480(14) 0.0292(12) -0.0051(10) -0.0043(10) -0.0032(11)
 C4 0.0427(14) 0.0480(14) 0.0316(12) -0.0082(11) 0.0083(10) -0.0048(11)
 C5 0.0475(15) 0.0448(14) 0.0471(15) -0.0140(12) 0.0011(12) 0.0132(12)
 C6 0.0321(12) 0.0485(14) 0.0259(11) -0.0033(10) 0.0054(9) -0.0052(10)
 C7 0.0253(11) 0.0583(15) 0.0396(13) -0.0120(11) 0.0079(10) 0.0004(10)
 C8 0.0327(12) 0.0360(12) 0.0483(14) -0.0098(11) -0.0019(10) 0.0087(10)
 C9 0.0302(11) 0.0246(10) 0.0410(13) -0.0053(9) -0.0005(9) -0.0018(9)
 C10 0.0270(10) 0.0297(11) 0.0263(11) -0.0071(9) 0.0007(8) -0.0029(9)
 C11 0.0273(10) 0.0295(11) 0.0241(10) -0.0054(8) 0.0012(8) -0.0046(8)
 C12 0.0296(11) 0.0312(11) 0.0315(11) 0.0010(9) 0.0029(9) -0.0076(9)
 C13 0.0341(11) 0.0278(11) 0.0259(11) -0.0004(8) -0.0003(9) -0.0051(9)
 C14 0.0429(14) 0.0451(14) 0.0409(14) 0.0154(11) 0.0000(11) -0.0049(11)
 C15 0.0307(11) 0.0301(11) 0.0258(10) -0.0026(9) -0.0032(8) 0.0003(9)
 C16 0.0415(13) 0.0285(11) 0.0449(14) -0.0005(10) -0.0059(11) -0.0003(10)
 C17 0.0492(15) 0.0310(12) 0.0490(15) -0.0031(11) -0.0122(12) 0.0100(11)
 C18 0.0340(13) 0.0412(14) 0.0540(16) -0.0097(12) -0.0113(11) 0.0098(11)
 C19 0.0296(11) 0.0368(12) 0.0477(14) -0.0055(11) -0.0024(10) 0.0010(10)
 C20 0.0300(11) 0.0281(10) 0.0284(11) -0.0034(8) -0.0008(9) 0.0028(9)
 C21 0.0237(10) 0.0348(12) 0.0387(12) -0.0014(10) 0.0023(9) 0.0002(9)
 C22 0.0288(11) 0.0295(11) 0.0347(11) -0.0014(9) 0.0056(9) -0.0034(9)
 C23 0.0300(11) 0.0307(11) 0.0318(12) -0.0007(9) 0.0047(9) -0.0050(9)
 C24 0.0347(12) 0.0358(12) 0.0535(15) 0.0071(11) 0.0024(11) -0.0019(10)
 C25 0.0484(15) 0.0311(12) 0.0592(17) 0.0110(11) 0.0010(12) -0.0067(11)
 C26 0.0393(13) 0.0383(13) 0.0456(14) 0.0013(11) 0.0067(11) -0.0141(10)
 C27 0.0285(11) 0.0387(13) 0.0453(14) -0.0005(10) 0.0046(10) -0.0065(10)
 C28 0.0445(15) 0.0631(18) 0.0597(17) -0.0030(14) 0.0101(13) -0.0266(13)
 O4 0.0416(10) 0.0697(13) 0.0724(14) -0.0204(11) 0.0096(9) -0.0011(9)
 C29 0.0478(16) 0.0602(18) 0.0674(19) -0.0216(15) 0.0150(14) -0.0065(13)

_geom_special_details
;
 All esds (except the esd in the dihedral angle between two l.s. planes) 
 are estimated using the full covariance matrix.  The cell esds are taken 
 into account individually in the estimation of esds in distances, angles 
 and torsion angles; correlations between esds in cell parameters are only 
 used when they are defined by crystal symmetry.  An approximate (isotropic) 
 treatment of cell esds is used for estimating esds involving l.s. planes. 
;
loop_
  _geom_bond_atom_site_label_1
  _geom_bond_atom_site_label_2
  _geom_bond_distance
  _geom_bond_site_symmetry_2
  _geom_bond_publ_flag
 Cu1 O1 1.8997(15) . ?
 Cu1 O2 1.9142(15) . ?
 Cu1 N1 1.9604(17) . ?
 Cu1 N2 1.9246(17) . ?
 Fe1 C1 2.032(2) . ?
 Fe1 C2 2.036(2) . ?
 Fe1 C3 2.044(2) . ?
 Fe1 C4 2.042(2) . ?
 Fe1 C5 2.036(2) . ?
 Fe1 C6 2.029(2) . ?
 Fe1 C7 2.039(2) . ?
 Fe1 C8 2.048(2) . ?
 Fe1 C9 2.039(2) . ?
 Fe1 C10 2.045(2) . ?
 O1 C11 1.284(2) . ?
 O2 C23 1.316(2) . ?
 O3 C26 1.385(3) . ?
 O3 C28 1.414(3) . ?
 N1 C13 1.334(3) . ?
 N1 C15 1.415(3) . ?
 N2 C20 1.419(3) . ?
 N2 C21 1.291(3) . ?
 C1 H1 0.9300 . ?
 C1 C2 1.415(4) . ?
 C1 C5 1.410(4) . ?
 C2 H2 0.9300 . ?
 C2 C3 1.412(4) . ?
 C3 H3 0.9300 . ?
 C3 C4 1.410(3) . ?
 C4 H4 0.9300 . ?
 C4 C5 1.407(4) . ?
 C5 H5 0.9300 . ?
 C6 H6 0.9300 . ?
 C6 C7 1.417(3) . ?
 C6 C10 1.434(3) . ?
 C7 H7 0.9300 . ?
 C7 C8 1.415(4) . ?
 C8 H8 0.9300 . ?
 C8 C9 1.407(3) . ?
 C9 H9 0.9300 . ?
 C9 C10 1.428(3) . ?
 C10 C11 1.477(3) . ?
 C11 C12 1.388(3) . ?
 C12 H12 0.9300 . ?
 C12 C13 1.406(3) . ?
 C13 C14 1.514(3) . ?
 C14 H14A 0.9600 . ?
 C14 H14B 0.9600 . ?
 C14 H14C 0.9600 . ?
 C15 C16 1.402(3) . ?
 C15 C20 1.410(3) . ?
 C16 H16 0.9300 . ?
 C16 C17 1.380(3) . ?
 C17 H17 0.9300 . ?
 C17 C18 1.377(4) . ?
 C18 H18 0.9300 . ?
 C18 C19 1.377(3) . ?
 C19 H19 0.9300 . ?
 C19 C20 1.389(3) . ?
 C21 H21 0.9300 . ?
 C21 C22 1.427(3) . ?
 C22 C23 1.416(3) . ?
 C22 C27 1.418(3) . ?
 C23 C24 1.409(3) . ?
 C24 H24 0.9300 . ?
 C24 C25 1.376(3) . ?
 C25 H25 0.9300 . ?
 C25 C26 1.386(4) . ?
 C26 C27 1.361(3) . ?
 C27 H27 0.9300 . ?
 C28 H28A 0.9600 . ?
 C28 H28B 0.9600 . ?
 C28 H28C 0.9600 . ?
 O4 H4A 0.8200 . ?
 O4 C29 1.402(3) . ?
 C29 H29A 0.9600 . ?
 C29 H29B 0.9600 . ?
 C29 H29C 0.9600 . ?

loop_
  _geom_angle_atom_site_label_1
  _geom_angle_atom_site_label_2
  _geom_angle_atom_site_label_3
  _geom_angle
  _geom_angle_site_symmetry_1
  _geom_angle_site_symmetry_3
  _geom_angle_publ_flag
 O1 Cu1 O2 86.91(6) . . ?
 O1 Cu1 N1 94.79(7) . . ?
 O1 Cu1 N2 175.68(7) . . ?
 O2 Cu1 N1 170.79(7) . . ?
 O2 Cu1 N2 94.09(7) . . ?
 N2 Cu1 N1 84.89(7) . . ?
 C1 Fe1 C2 40.70(11) . . ?
 C1 Fe1 C3 68.24(11) . . ?
 C1 Fe1 C4 68.12(11) . . ?
 C1 Fe1 C5 40.55(11) . . ?
 C1 Fe1 C7 122.56(11) . . ?
 C1 Fe1 C8 158.74(11) . . ?
 C1 Fe1 C9 159.30(10) . . ?
 C1 Fe1 C10 122.51(10) . . ?
 C2 Fe1 C3 40.48(10) . . ?
 C2 Fe1 C4 68.01(10) . . ?
 C2 Fe1 C7 106.62(10) . . ?
 C2 Fe1 C8 122.65(11) . . ?
 C2 Fe1 C9 159.01(10) . . ?
 C2 Fe1 C10 158.12(10) . . ?
 C3 Fe1 C8 107.61(10) . . ?
 C3 Fe1 C10 160.14(9) . . ?
 C4 Fe1 C3 40.36(10) . . ?
 C4 Fe1 C8 123.12(10) . . ?
 C4 Fe1 C10 124.20(9) . . ?
 C5 Fe1 C2 68.14(11) . . ?
 C5 Fe1 C3 67.97(10) . . ?
 C5 Fe1 C4 40.36(10) . . ?
 C5 Fe1 C7 159.38(11) . . ?
 C5 Fe1 C8 159.14(11) . . ?
 C5 Fe1 C9 123.88(10) . . ?
 C5 Fe1 C10 108.29(10) . . ?
 C6 Fe1 C1 106.74(10) . . ?
 C6 Fe1 C2 121.35(10) . . ?
 C6 Fe1 C3 157.31(10) . . ?
 C6 Fe1 C4 160.31(10) . . ?
 C6 Fe1 C5 123.52(10) . . ?
 C6 Fe1 C7 40.77(9) . . ?
 C6 Fe1 C8 68.59(10) . . ?
 C6 Fe1 C9 68.81(9) . . ?
 C6 Fe1 C10 41.22(8) . . ?
 C7 Fe1 C3 121.85(10) . . ?
 C7 Fe1 C4 158.10(10) . . ?
 C7 Fe1 C8 40.51(10) . . ?
 C7 Fe1 C9 68.10(10) . . ?
 C7 Fe1 C10 68.71(9) . . ?
 C9 Fe1 C3 123.67(10) . . ?
 C9 Fe1 C4 108.87(10) . . ?
 C9 Fe1 C8 40.27(9) . . ?
 C9 Fe1 C10 40.92(9) . . ?
 C10 Fe1 C8 68.53(9) . . ?
 C11 O1 Cu1 124.77(13) . . ?
 C23 O2 Cu1 126.56(13) . . ?
 C26 O3 C28 116.3(2) . . ?
 C13 N1 Cu1 121.58(14) . . ?
 C13 N1 C15 125.52(18) . . ?
 C15 N1 Cu1 111.45(13) . . ?
 C20 N2 Cu1 112.62(13) . . ?
 C21 N2 Cu1 125.32(15) . . ?
 C21 N2 C20 122.04(18) . . ?
 Fe1 C1 H1 125.8 . . ?
 C2 C1 Fe1 69.81(14) . . ?
 C2 C1 H1 126.1 . . ?
 C5 C1 Fe1 69.87(14) . . ?
 C5 C1 H1 126.1 . . ?
 C5 C1 C2 107.7(2) . . ?
 Fe1 C2 H2 126.0 . . ?
 C1 C2 Fe1 69.49(14) . . ?
 C1 C2 H2 126.0 . . ?
 C3 C2 Fe1 70.07(13) . . ?
 C3 C2 C1 108.0(2) . . ?
 C3 C2 H2 126.0 . . ?
 Fe1 C3 H3 126.3 . . ?
 C2 C3 Fe1 69.46(13) . . ?
 C2 C3 H3 126.1 . . ?
 C4 C3 Fe1 69.75(13) . . ?
 C4 C3 C2 107.9(2) . . ?
 C4 C3 H3 126.1 . . ?
 Fe1 C4 H4 126.2 . . ?
 C3 C4 Fe1 69.89(13) . . ?
 C3 C4 H4 125.9 . . ?
 C5 C4 Fe1 69.57(14) . . ?
 C5 C4 C3 108.1(2) . . ?
 C5 C4 H4 125.9 . . ?
 Fe1 C5 H5 126.0 . . ?
 C1 C5 Fe1 69.58(14) . . ?
 C1 C5 H5 125.9 . . ?
 C4 C5 Fe1 70.06(14) . . ?
 C4 C5 C1 108.2(2) . . ?
 C4 C5 H5 125.9 . . ?
 Fe1 C6 H6 125.5 . . ?
 C7 C6 Fe1 69.99(13) . . ?
 C7 C6 H6 126.1 . . ?
 C7 C6 C10 107.9(2) . . ?
 C10 C6 Fe1 70.01(12) . . ?
 C10 C6 H6 126.1 . . ?
 Fe1 C7 H7 126.5 . . ?
 C6 C7 Fe1 69.24(13) . . ?
 C6 C7 H7 125.8 . . ?
 C8 C7 Fe1 70.11(13) . . ?
 C8 C7 C6 108.4(2) . . ?
 C8 C7 H7 125.8 . . ?
 Fe1 C8 H8 126.7 . . ?
 C7 C8 Fe1 69.38(13) . . ?
 C7 C8 H8 126.0 . . ?
 C9 C8 Fe1 69.51(12) . . ?
 C9 C8 C7 108.0(2) . . ?
 C9 C8 H8 126.0 . . ?
 Fe1 C9 H9 126.0 . . ?
 C8 C9 Fe1 70.23(13) . . ?
 C8 C9 H9 125.6 . . ?
 C8 C9 C10 108.8(2) . . ?
 C10 C9 Fe1 69.78(12) . . ?
 C10 C9 H9 125.6 . . ?
 C6 C10 Fe1 68.77(12) . . ?
 C6 C10 C11 129.3(2) . . ?
 C9 C10 Fe1 69.30(12) . . ?
 C9 C10 C6 106.86(19) . . ?
 C9 C10 C11 123.88(19) . . ?
 C11 C10 Fe1 126.42(14) . . ?
 O1 C11 C10 114.47(18) . . ?
 O1 C11 C12 124.71(19) . . ?
 C12 C11 C10 120.76(18) . . ?
 C11 C12 H12 116.2 . . ?
 C11 C12 C13 127.56(19) . . ?
 C13 C12 H12 116.2 . . ?
 N1 C13 C12 122.05(19) . . ?
 N1 C13 C14 123.07(19) . . ?
 C12 C13 C14 114.82(19) . . ?
 C13 C14 H14A 109.5 . . ?
 C13 C14 H14B 109.5 . . ?
 C13 C14 H14C 109.5 . . ?
 H14A C14 H14B 109.5 . . ?
 H14A C14 H14C 109.5 . . ?
 H14B C14 H14C 109.5 . . ?
 C16 C15 N1 126.9(2) . . ?
 C16 C15 C20 117.49(19) . . ?
 C20 C15 N1 115.43(18) . . ?
 C15 C16 H16 119.6 . . ?
 C17 C16 C15 120.7(2) . . ?
 C17 C16 H16 119.6 . . ?
 C16 C17 H17 119.5 . . ?
 C18 C17 C16 120.9(2) . . ?
 C18 C17 H17 119.5 . . ?
 C17 C18 H18 120.2 . . ?
 C17 C18 C19 119.7(2) . . ?
 C19 C18 H18 120.2 . . ?
 C18 C19 H19 119.8 . . ?
 C18 C19 C20 120.3(2) . . ?
 C20 C19 H19 119.8 . . ?
 C15 C20 N2 115.18(18) . . ?
 C19 C20 N2 124.1(2) . . ?
 C19 C20 C15 120.7(2) . . ?
 N2 C21 H21 116.9 . . ?
 N2 C21 C22 126.2(2) . . ?
 C22 C21 H21 116.9 . . ?
 C23 C22 C21 123.24(19) . . ?
 C23 C22 C27 120.1(2) . . ?
 C27 C22 C21 116.7(2) . . ?
 O2 C23 C22 124.12(19) . . ?
 O2 C23 C24 119.0(2) . . ?
 C24 C23 C22 116.88(19) . . ?
 C23 C24 H24 119.2 . . ?
 C25 C24 C23 121.5(2) . . ?
 C25 C24 H24 119.2 . . ?
 C24 C25 H25 119.4 . . ?
 C24 C25 C26 121.1(2) . . ?
 C26 C25 H25 119.4 . . ?
 O3 C26 C25 116.0(2) . . ?
 C27 C26 O3 124.7(2) . . ?
 C27 C26 C25 119.3(2) . . ?
 C22 C27 H27 119.5 . . ?
 C26 C27 C22 121.0(2) . . ?
 C26 C27 H27 119.5 . . ?
 O3 C28 H28A 109.5 . . ?
 O3 C28 H28B 109.5 . . ?
 O3 C28 H28C 109.5 . . ?
 H28A C28 H28B 109.5 . . ?
 H28A C28 H28C 109.5 . . ?
 H28B C28 H28C 109.5 . . ?
 C29 O4 H4A 109.5 . . ?
 O4 C29 H29A 109.5 . . ?
 O4 C29 H29B 109.5 . . ?
 O4 C29 H29C 109.5 . . ?
 H29A C29 H29B 109.5 . . ?
 H29A C29 H29C 109.5 . . ?
 H29B C29 H29C 109.5 . . ?

loop_
  _geom_hbond_atom_site_label_D
  _geom_hbond_atom_site_label_H
  _geom_hbond_atom_site_label_A
  _geom_hbond_distance_DH
  _geom_hbond_distance_HA
  _geom_hbond_distance_DA
  _geom_hbond_angle_DHA
  _geom_hbond_site_symmetry_A
 O4 H4A O2 0.82 1.97 2.789(3) 172.3 .

loop_
  _geom_torsion_atom_site_label_1
  _geom_torsion_atom_site_label_2
  _geom_torsion_atom_site_label_3
  _geom_torsion_atom_site_label_4
  _geom_torsion
  _geom_torsion_site_symmetry_1
  _geom_torsion_site_symmetry_2
  _geom_torsion_site_symmetry_3
  _geom_torsion_site_symmetry_4
  _geom_torsion_publ_flag
 Cu1 O1 C11 C10 -172.48(13) . . . . ?
 Cu1 O1 C11 C12 4.7(3) . . . . ?
 Cu1 O2 C23 C22 4.5(3) . . . . ?
 Cu1 O2 C23 C24 -176.20(17) . . . . ?
 Cu1 N1 C13 C12 -21.4(3) . . . . ?
 Cu1 N1 C13 C14 155.67(17) . . . . ?
 Cu1 N1 C15 C16 169.65(19) . . . . ?
 Cu1 N1 C15 C20 -5.5(2) . . . . ?
 Cu1 N2 C20 C15 3.9(2) . . . . ?
 Cu1 N2 C20 C19 -175.19(17) . . . . ?
 Cu1 N2 C21 C22 -1.2(3) . . . . ?
 Fe1 C1 C2 C3 -59.71(17) . . . . ?
 Fe1 C1 C5 C4 59.63(17) . . . . ?
 Fe1 C2 C3 C4 -59.37(16) . . . . ?
 Fe1 C3 C4 C5 -59.27(16) . . . . ?
 Fe1 C4 C5 C1 -59.32(17) . . . . ?
 Fe1 C6 C7 C8 59.33(16) . . . . ?
 Fe1 C6 C10 C9 -59.07(14) . . . . ?
 Fe1 C6 C10 C11 120.3(2) . . . . ?
 Fe1 C7 C8 C9 58.95(16) . . . . ?
 Fe1 C8 C9 C10 59.31(15) . . . . ?
 Fe1 C9 C10 C6 58.73(14) . . . . ?
 Fe1 C9 C10 C11 -120.71(19) . . . . ?
 Fe1 C10 C11 O1 -96.4(2) . . . . ?
 Fe1 C10 C11 C12 86.3(2) . . . . ?
 O1 Cu1 O2 C23 168.49(18) . . . . ?
 O1 Cu1 N1 C13 23.40(17) . . . . ?
 O1 Cu1 N1 C15 -169.63(14) . . . . ?
 O1 Cu1 N2 C20 80.5(9) . . . . ?
 O1 Cu1 N2 C21 -97.6(9) . . . . ?
 O1 C11 C12 C13 4.7(4) . . . . ?
 O2 Cu1 O1 C11 155.54(17) . . . . ?
 O2 Cu1 N1 C13 -76.9(4) . . . . ?
 O2 Cu1 N1 C15 90.0(4) . . . . ?
 O2 Cu1 N2 C20 -176.28(14) . . . . ?
 O2 Cu1 N2 C21 5.62(19) . . . . ?
 O2 C23 C24 C25 177.9(2) . . . . ?
 O3 C26 C27 C22 177.0(2) . . . . ?
 N1 Cu1 O1 C11 -15.39(18) . . . . ?
 N1 Cu1 O2 C23 -90.6(4) . . . . ?
 N1 Cu1 N2 C20 -5.46(14) . . . . ?
 N1 Cu1 N2 C21 176.44(19) . . . . ?
 N1 C15 C16 C17 179.9(2) . . . . ?
 N1 C15 C20 N2 1.2(3) . . . . ?
 N1 C15 C20 C19 -179.72(19) . . . . ?
 N2 Cu1 O1 C11 -100.9(9) . . . . ?
 N2 Cu1 O2 C23 -7.30(18) . . . . ?
 N2 Cu1 N1 C13 -160.92(17) . . . . ?
 N2 Cu1 N1 C15 6.05(14) . . . . ?
 N2 C21 C22 C23 -4.2(4) . . . . ?
 N2 C21 C22 C27 175.9(2) . . . . ?
 C1 Fe1 C2 C3 119.1(2) . . . . ?
 C1 Fe1 C3 C2 -37.83(17) . . . . ?
 C1 Fe1 C3 C4 81.38(17) . . . . ?
 C1 Fe1 C4 C3 -81.70(16) . . . . ?
 C1 Fe1 C4 C5 37.64(16) . . . . ?
 C1 Fe1 C5 C4 -119.3(2) . . . . ?
 C1 Fe1 C6 C7 120.78(16) . . . . ?
 C1 Fe1 C6 C10 -120.54(15) . . . . ?
 C1 Fe1 C7 C6 -77.46(17) . . . . ?
 C1 Fe1 C7 C8 162.73(14) . . . . ?
 C1 Fe1 C8 C7 -43.6(3) . . . . ?
 C1 Fe1 C8 C9 -163.2(3) . . . . ?
 C1 Fe1 C9 C8 162.8(3) . . . . ?
 C1 Fe1 C9 C10 42.9(3) . . . . ?
 C1 Fe1 C10 C6 77.94(17) . . . . ?
 C1 Fe1 C10 C9 -163.41(14) . . . . ?
 C1 Fe1 C10 C11 -45.9(2) . . . . ?
 C1 C2 C3 Fe1 59.35(17) . . . . ?
 C1 C2 C3 C4 0.0(3) . . . . ?
 C2 Fe1 C1 C5 -118.7(2) . . . . ?
 C2 Fe1 C3 C4 119.2(2) . . . . ?
 C2 Fe1 C4 C3 -37.67(15) . . . . ?
 C2 Fe1 C4 C5 81.67(17) . . . . ?
 C2 Fe1 C5 C1 38.03(16) . . . . ?
 C2 Fe1 C5 C4 -81.31(16) . . . . ?
 C2 Fe1 C6 C7 78.83(18) . . . . ?
 C2 Fe1 C6 C10 -162.49(14) . . . . ?
 C2 Fe1 C7 C6 -119.03(15) . . . . ?
 C2 Fe1 C7 C8 121.17(15) . . . . ?
 C2 Fe1 C8 C7 -76.87(17) . . . . ?
 C2 Fe1 C8 C9 163.56(14) . . . . ?
 C2 Fe1 C9 C8 -41.7(3) . . . . ?
 C2 Fe1 C9 C10 -161.5(3) . . . . ?
 C2 Fe1 C10 C6 43.6(3) . . . . ?
 C2 Fe1 C10 C9 162.3(3) . . . . ?
 C2 Fe1 C10 C11 -80.2(3) . . . . ?
 C2 C1 C5 Fe1 -59.79(17) . . . . ?
 C2 C1 C5 C4 -0.2(3) . . . . ?
 C2 C3 C4 Fe1 59.19(17) . . . . ?
 C2 C3 C4 C5 -0.1(3) . . . . ?
 C3 Fe1 C1 C2 37.63(16) . . . . ?
 C3 Fe1 C1 C5 -81.10(17) . . . . ?
 C3 Fe1 C2 C1 -119.1(2) . . . . ?
 C3 Fe1 C4 C5 119.3(2) . . . . ?
 C3 Fe1 C5 C1 81.83(17) . . . . ?
 C3 Fe1 C5 C4 -37.52(14) . . . . ?
 C3 Fe1 C6 C7 47.3(3) . . . . ?
 C3 Fe1 C6 C10 166.0(2) . . . . ?
 C3 Fe1 C7 C6 -160.51(14) . . . . ?
 C3 Fe1 C7 C8 79.68(16) . . . . ?
 C3 Fe1 C8 C7 -118.75(14) . . . . ?
 C3 Fe1 C8 C9 121.68(15) . . . . ?
 C3 Fe1 C9 C8 -77.05(17) . . . . ?
 C3 Fe1 C9 C10 163.12(13) . . . . ?
 C3 Fe1 C10 C6 -164.0(3) . . . . ?
 C3 Fe1 C10 C9 -45.4(3) . . . . ?
 C3 Fe1 C10 C11 72.1(3) . . . . ?
 C3 C4 C5 Fe1 59.47(16) . . . . ?
 C3 C4 C5 C1 0.1(3) . . . . ?
 C4 Fe1 C1 C2 81.26(17) . . . . ?
 C4 Fe1 C1 C5 -37.47(15) . . . . ?
 C4 Fe1 C2 C1 -81.57(18) . . . . ?
 C4 Fe1 C2 C3 37.56(15) . . . . ?
 C4 Fe1 C3 C2 -119.2(2) . . . . ?
 C4 Fe1 C5 C1 119.3(2) . . . . ?
 C4 Fe1 C6 C7 -167.5(3) . . . . ?
 C4 Fe1 C6 C10 -48.9(3) . . . . ?
 C4 Fe1 C7 C6 168.8(2) . . . . ?
 C4 Fe1 C7 C8 49.0(3) . . . . ?
 C4 Fe1 C8 C7 -160.38(14) . . . . ?
 C4 Fe1 C8 C9 80.05(16) . . . . ?
 C4 Fe1 C9 C8 -119.33(15) . . . . ?
 C4 Fe1 C9 C10 120.84(13) . . . . ?
 C4 Fe1 C10 C6 162.14(14) . . . . ?
 C4 Fe1 C10 C9 -79.22(16) . . . . ?
 C4 Fe1 C10 C11 38.3(2) . . . . ?
 C5 Fe1 C1 C2 118.7(2) . . . . ?
 C5 Fe1 C2 C1 -37.90(17) . . . . ?
 C5 Fe1 C2 C3 81.23(17) . . . . ?
 C5 Fe1 C3 C2 -81.69(18) . . . . ?
 C5 Fe1 C3 C4 37.52(15) . . . . ?
 C5 Fe1 C4 C3 -119.3(2) . . . . ?
 C5 Fe1 C6 C7 161.97(15) . . . . ?
 C5 Fe1 C6 C10 -79.35(16) . . . . ?
 C5 Fe1 C7 C6 -47.1(3) . . . . ?
 C5 Fe1 C7 C8 -166.9(3) . . . . ?
 C5 Fe1 C8 C7 167.1(3) . . . . ?
 C5 Fe1 C8 C9 47.5(3) . . . . ?
 C5 Fe1 C9 C8 -161.57(15) . . . . ?
 C5 Fe1 C9 C10 78.61(16) . . . . ?
 C5 Fe1 C10 C6 120.35(15) . . . . ?
 C5 Fe1 C10 C9 -121.00(14) . . . . ?
 C5 Fe1 C10 C11 -3.5(2) . . . . ?
 C5 C1 C2 Fe1 59.82(17) . . . . ?
 C5 C1 C2 C3 0.1(3) . . . . ?
 C6 Fe1 C1 C2 -118.90(16) . . . . ?
 C6 Fe1 C1 C5 122.37(16) . . . . ?
 C6 Fe1 C2 C1 78.99(19) . . . . ?
 C6 Fe1 C2 C3 -161.88(15) . . . . ?
 C6 Fe1 C3 C2 43.5(3) . . . . ?
 C6 Fe1 C3 C4 162.7(2) . . . . ?
 C6 Fe1 C4 C3 -160.1(3) . . . . ?
 C6 Fe1 C4 C5 -40.8(4) . . . . ?
 C6 Fe1 C5 C1 -75.96(18) . . . . ?
 C6 Fe1 C5 C4 164.70(14) . . . . ?
 C6 Fe1 C7 C8 -119.8(2) . . . . ?
 C6 Fe1 C8 C7 37.49(13) . . . . ?
 C6 Fe1 C8 C9 -82.08(15) . . . . ?
 C6 Fe1 C9 C8 81.49(15) . . . . ?
 C6 Fe1 C9 C10 -38.33(12) . . . . ?
 C6 Fe1 C10 C9 118.65(18) . . . . ?
 C6 Fe1 C10 C11 -123.9(2) . . . . ?
 C6 C7 C8 Fe1 -58.79(16) . . . . ?
 C6 C7 C8 C9 0.2(3) . . . . ?
 C6 C10 C11 O1 172.4(2) . . . . ?
 C6 C10 C11 C12 -4.9(3) . . . . ?
 C7 Fe1 C1 C2 -77.17(18) . . . . ?
 C7 Fe1 C1 C5 164.11(15) . . . . ?
 C7 Fe1 C2 C1 120.95(17) . . . . ?
 C7 Fe1 C2 C3 -119.92(16) . . . . ?
 C7 Fe1 C3 C2 77.91(19) . . . . ?
 C7 Fe1 C3 C4 -162.89(15) . . . . ?
 C7 Fe1 C4 C3 42.1(3) . . . . ?
 C7 Fe1 C4 C5 161.4(2) . . . . ?
 C7 Fe1 C5 C1 -40.9(3) . . . . ?
 C7 Fe1 C5 C4 -160.3(2) . . . . ?
 C7 Fe1 C6 C10 118.7(2) . . . . ?
 C7 Fe1 C8 C9 -119.6(2) . . . . ?
 C7 Fe1 C9 C8 37.51(15) . . . . ?
 C7 Fe1 C9 C10 -82.32(14) . . . . ?
 C7 Fe1 C10 C6 -37.95(14) . . . . ?
 C7 Fe1 C10 C9 80.70(14) . . . . ?
 C7 Fe1 C10 C11 -161.8(2) . . . . ?
 C7 C6 C10 Fe1 60.01(15) . . . . ?
 C7 C6 C10 C9 0.9(2) . . . . ?
 C7 C6 C10 C11 -179.7(2) . . . . ?
 C7 C8 C9 Fe1 -58.88(16) . . . . ?
 C7 C8 C9 C10 0.4(3) . . . . ?
 C8 Fe1 C1 C2 -45.0(4) . . . . ?
 C8 Fe1 C1 C5 -163.8(3) . . . . ?
 C8 Fe1 C2 C1 162.26(16) . . . . ?
 C8 Fe1 C2 C3 -78.61(18) . . . . ?
 C8 Fe1 C3 C2 120.01(17) . . . . ?
 C8 Fe1 C3 C4 -120.78(15) . . . . ?
 C8 Fe1 C4 C3 77.88(17) . . . . ?
 C8 Fe1 C4 C5 -162.78(15) . . . . ?
 C8 Fe1 C5 C1 163.5(3) . . . . ?
 C8 Fe1 C5 C4 44.1(3) . . . . ?
 C8 Fe1 C6 C7 -37.26(14) . . . . ?
 C8 Fe1 C6 C10 81.42(14) . . . . ?
 C8 Fe1 C7 C6 119.8(2) . . . . ?
 C8 Fe1 C9 C10 -119.82(19) . . . . ?
 C8 Fe1 C10 C6 -81.59(15) . . . . ?
 C8 Fe1 C10 C9 37.05(13) . . . . ?
 C8 Fe1 C10 C11 154.6(2) . . . . ?
 C8 C9 C10 Fe1 -59.59(15) . . . . ?
 C8 C9 C10 C6 -0.9(2) . . . . ?
 C8 C9 C10 C11 179.70(19) . . . . ?
 C9 Fe1 C1 C2 166.9(3) . . . . ?
 C9 Fe1 C1 C5 48.1(4) . . . . ?
 C9 Fe1 C2 C1 -167.0(3) . . . . ?
 C9 Fe1 C2 C3 -47.9(4) . . . . ?
 C9 Fe1 C3 C2 161.38(15) . . . . ?
 C9 Fe1 C3 C4 -79.42(17) . . . . ?
 C9 Fe1 C4 C3 120.16(15) . . . . ?
 C9 Fe1 C4 C5 -120.50(16) . . . . ?
 C9 Fe1 C5 C1 -161.52(15) . . . . ?
 C9 Fe1 C5 C4 79.14(17) . . . . ?
 C9 Fe1 C6 C7 -80.62(15) . . . . ?
 C9 Fe1 C6 C10 38.06(12) . . . . ?
 C9 Fe1 C7 C6 82.51(15) . . . . ?
 C9 Fe1 C7 C8 -37.29(13) . . . . ?
 C9 Fe1 C8 C7 119.6(2) . . . . ?
 C9 Fe1 C10 C6 -118.65(18) . . . . ?
 C9 Fe1 C10 C11 117.5(2) . . . . ?
 C9 C10 C11 O1 -8.3(3) . . . . ?
 C9 C10 C11 C12 174.4(2) . . . . ?
 C10 Fe1 C1 C2 -161.20(14) . . . . ?
 C10 Fe1 C1 C5 80.07(18) . . . . ?
 C10 Fe1 C2 C1 46.8(3) . . . . ?
 C10 Fe1 C2 C3 166.0(2) . . . . ?
 C10 Fe1 C3 C2 -164.6(2) . . . . ?
 C10 Fe1 C3 C4 -45.4(3) . . . . ?
 C10 Fe1 C4 C3 163.01(14) . . . . ?
 C10 Fe1 C4 C5 -77.65(18) . . . . ?
 C10 Fe1 C5 C1 -118.97(16) . . . . ?
 C10 Fe1 C5 C4 121.69(15) . . . . ?
 C10 Fe1 C6 C7 -118.7(2) . . . . ?
 C10 Fe1 C7 C6 38.35(13) . . . . ?
 C10 Fe1 C7 C8 -81.45(14) . . . . ?
 C10 Fe1 C8 C7 81.94(14) . . . . ?
 C10 Fe1 C8 C9 -37.64(13) . . . . ?
 C10 Fe1 C9 C8 119.82(19) . . . . ?
 C10 C6 C7 Fe1 -60.02(15) . . . . ?
 C10 C6 C7 C8 -0.7(3) . . . . ?
 C10 C11 C12 C13 -178.4(2) . . . . ?
 C11 C12 C13 N1 5.1(3) . . . . ?
 C11 C12 C13 C14 -172.2(2) . . . . ?
 C13 N1 C15 C16 -24.0(3) . . . . ?
 C13 N1 C15 C20 160.8(2) . . . . ?
 C15 N1 C13 C12 173.51(19) . . . . ?
 C15 N1 C13 C14 -9.4(3) . . . . ?
 C15 C16 C17 C18 2.7(4) . . . . ?
 C16 C15 C20 N2 -174.46(19) . . . . ?
 C16 C15 C20 C19 4.6(3) . . . . ?
 C16 C17 C18 C19 0.3(4) . . . . ?
 C17 C18 C19 C20 -0.7(4) . . . . ?
 C18 C19 C20 N2 177.1(2) . . . . ?
 C18 C19 C20 C15 -1.8(3) . . . . ?
 C20 N2 C21 C22 -179.1(2) . . . . ?
 C20 C15 C16 C17 -5.0(3) . . . . ?
 C21 N2 C20 C15 -178.0(2) . . . . ?
 C21 N2 C20 C19 3.0(3) . . . . ?
 C21 C22 C23 O2 2.4(3) . . . . ?
 C21 C22 C23 C24 -176.9(2) . . . . ?
 C21 C22 C27 C26 179.6(2) . . . . ?
 C22 C23 C24 C25 -2.8(4) . . . . ?
 C23 C22 C27 C26 -0.3(3) . . . . ?
 C23 C24 C25 C26 -0.2(4) . . . . ?
 C24 C25 C26 O3 -176.7(2) . . . . ?
 C24 C25 C26 C27 3.1(4) . . . . ?
 C25 C26 C27 C22 -2.8(4) . . . . ?
 C27 C22 C23 O2 -177.7(2) . . . . ?
 C27 C22 C23 C24 3.0(3) . . . . ?
 C28 O3 C26 C25 -175.5(2) . . . . ?
 C28 O3 C26 C27 4.7(4) . . . . ?

_iucr_refine_instructions_details
;
TITL ABS in P21/c #14
REM reset to P21/c #14
CELL 0.71073 13.3293 24.948 7.4866 90 97.244 90
ZERR 4 0.0026 0.0047 0.0016 0 0.007 0
LATT 1
SYMM -X,0.5+Y,0.5-Z
SFAC C H Cu Fe N O
UNIT 116 112 4 4 8 16
 
L.S. 20 0 0
PLAN  20
TEMP 23
HTAB O4 O2
BOND
MORE -1
BOND $H
CONF
fmap 2
acta
REM <olex2.extras>
REM <HklSrc "%.\\ABS.hkl">
REM </olex2.extras>
 
WGHT    0.031100    1.398100
FVAR       0.09426
CU1   3    0.167160    0.590396    0.710715    11.00000    0.02263    0.02583 =
         0.03386    0.00352    0.00141   -0.00176
FE1   4    0.569078    0.639701    1.003946    11.00000    0.02360    0.02752 =
         0.02631   -0.00140    0.00108   -0.00299
O1    6    0.308926    0.589260    0.783504    11.00000    0.02535    0.03512 =
         0.04410    0.01125    0.00076   -0.00276
O2    6    0.167402    0.515793    0.770503    11.00000    0.02404    0.02857 =
         0.05576    0.00697    0.00600   -0.00132
O3    6   -0.151574    0.381907    0.864370    11.00000    0.04498    0.04645 =
         0.08372    0.01531    0.00860   -0.01937
N1    5    0.166040    0.662879    0.609366    11.00000    0.02728    0.02678 =
         0.02869    0.00121   -0.00159   -0.00023
N2    5    0.022433    0.594169    0.653921    11.00000    0.02602    0.02714 =
         0.03072   -0.00040    0.00201    0.00008
C1    1    0.574148    0.719317    1.061672    11.00000    0.08183    0.02569 =
         0.04388   -0.00380    0.00171   -0.00643
AFIX  43
H1    2    0.574341    0.746943    0.978315    11.00000   -1.20000
AFIX   0
C2    1    0.660323    0.693234    1.151637    11.00000    0.04760    0.04667 =
         0.04502   -0.01065    0.00071   -0.02252
AFIX  43
H2    2    0.727271    0.700744    1.137974    11.00000   -1.20000
AFIX   0
C3    1    0.626865    0.653813    1.265779    11.00000    0.04214    0.04803 =
         0.02924   -0.00511   -0.00435   -0.00315
AFIX  43
H3    2    0.667842    0.630768    1.340524    11.00000   -1.20000
AFIX   0
C4    1    0.520332    0.655561    1.246402    11.00000    0.04271    0.04805 =
         0.03159   -0.00818    0.00828   -0.00475
AFIX  43
H4    2    0.478699    0.633810    1.306124    11.00000   -1.20000
AFIX   0
C5    1    0.487934    0.695929    1.121013    11.00000    0.04749    0.04479 =
         0.04713   -0.01402    0.00111    0.01320
AFIX  43
H5    2    0.421156    0.705526    1.083715    11.00000   -1.20000
AFIX   0
C6    1    0.569019    0.633019    0.733849    11.00000    0.03206    0.04847 =
         0.02593   -0.00334    0.00537   -0.00515
AFIX  43
H6    2    0.571091    0.661459    0.654089    11.00000   -1.20000
AFIX   0
C7    1    0.653727    0.605843    0.825254    11.00000    0.02528    0.05827 =
         0.03959   -0.01197    0.00788    0.00036
AFIX  43
H7    2    0.721142    0.613185    0.814795    11.00000   -1.20000
AFIX   0
C8    1    0.618382    0.565647    0.935129    11.00000    0.03274    0.03596 =
         0.04830   -0.00979   -0.00191    0.00868
AFIX  43
H8    2    0.658425    0.542095    1.009457    11.00000   -1.20000
AFIX   0
C9    1    0.512041    0.567554    0.912233    11.00000    0.03020    0.02459 =
         0.04100   -0.00528   -0.00049   -0.00182
AFIX  43
H9    2    0.469865    0.545515    0.969761    11.00000   -1.20000
AFIX   0
C10   1    0.479514    0.608881    0.786169    11.00000    0.02701    0.02974 =
         0.02630   -0.00708    0.00068   -0.00287
C11   1    0.372363    0.622216    0.728608    11.00000    0.02734    0.02948 =
         0.02411   -0.00543    0.00124   -0.00464
C12   1    0.346308    0.665871    0.617509    11.00000    0.02965    0.03116 =
         0.03147    0.00098    0.00290   -0.00760
AFIX  43
H12   2    0.399698    0.685094    0.580141    11.00000   -1.20000
AFIX   0
C13   1    0.248588    0.684418    0.554874    11.00000    0.03414    0.02784 =
         0.02589   -0.00039   -0.00033   -0.00505
C14   1    0.244635    0.728595    0.415599    11.00000    0.04295    0.04509 =
         0.04091    0.01537    0.00000   -0.00488
AFIX 137
H14A  2    0.187327    0.723158    0.326123    11.00000   -1.50000
H14B  2    0.305471    0.728005    0.359301    11.00000   -1.50000
H14C  2    0.238602    0.762643    0.473035    11.00000   -1.50000
AFIX   0
C15   1    0.066179    0.682398    0.566759    11.00000    0.03067    0.03012 =
         0.02577   -0.00264   -0.00321    0.00031
C16   1    0.037197    0.734957    0.518114    11.00000    0.04151    0.02854 =
         0.04490   -0.00053   -0.00588   -0.00029
AFIX  43
H16   2    0.086460    0.761043    0.511737    11.00000   -1.20000
AFIX   0
C17   1   -0.063661    0.748403    0.479587    11.00000    0.04919    0.03100 =
         0.04904   -0.00306   -0.01223    0.00998
AFIX  43
H17   2   -0.081426    0.783093    0.442684    11.00000   -1.20000
AFIX   0
C18   1   -0.138340    0.711168    0.495031    11.00000    0.03402    0.04120 =
         0.05400   -0.00973   -0.01131    0.00977
AFIX  43
H18   2   -0.206041    0.720647    0.468208    11.00000   -1.20000
AFIX   0
C19   1   -0.112296    0.659814    0.550397    11.00000    0.02961    0.03677 =
         0.04769   -0.00551   -0.00241    0.00095
AFIX  43
H19   2   -0.162613    0.634704    0.562157    11.00000   -1.20000
AFIX   0
C20   1   -0.011237    0.645351    0.588750    11.00000    0.02999    0.02815 =
         0.02841   -0.00340   -0.00084    0.00275
C21   1   -0.039812    0.555784    0.675719    11.00000    0.02371    0.03478 =
         0.03875   -0.00136    0.00231    0.00022
AFIX  43
H21   2   -0.108287    0.562945    0.645031    11.00000   -1.20000
AFIX   0
C22   1   -0.013500    0.503400    0.742447    11.00000    0.02884    0.02953 =
         0.03471   -0.00138    0.00561   -0.00336
C23   1    0.087631    0.485626    0.783507    11.00000    0.02996    0.03071 =
         0.03176   -0.00069    0.00473   -0.00498
C24   1    0.101987    0.431954    0.839737    11.00000    0.03470    0.03585 =
         0.05352    0.00705    0.00239   -0.00188
AFIX  43
H24   2    0.167364    0.418442    0.862806    11.00000   -1.20000
AFIX   0
C25   1    0.021505    0.399098    0.861274    11.00000    0.04842    0.03106 =
         0.05923    0.01097    0.00096   -0.00672
AFIX  43
H25   2    0.033473    0.363822    0.898104    11.00000   -1.20000
AFIX   0
C26   1   -0.077098    0.417667    0.829026    11.00000    0.03930    0.03826 =
         0.04559    0.00130    0.00672   -0.01411
C27   1   -0.094655    0.468519    0.766926    11.00000    0.02854    0.03867 =
         0.04535   -0.00050    0.00460   -0.00648
AFIX  43
H27   2   -0.160869    0.480568    0.740148    11.00000   -1.20000
AFIX   0
C28   1   -0.252650    0.399156    0.819310    11.00000    0.04451    0.06308 =
         0.05975   -0.00296    0.01006   -0.02664
AFIX 137
H28A  2   -0.265921    0.404908    0.691727    11.00000   -1.50000
H28B  2   -0.262845    0.432021    0.881242    11.00000   -1.50000
H28C  2   -0.297806    0.372250    0.854370    11.00000   -1.50000
AFIX   0
 
O4    6    0.279235    0.463792    0.531541    11.00000    0.04164    0.06966 =
         0.07235   -0.02041    0.00955   -0.00113
AFIX 147
H4A   2    0.250916    0.478623    0.609163    11.00000   -1.50000
AFIX   0
C29   1    0.378403    0.483196    0.538638    11.00000    0.04779    0.06018 =
         0.06743   -0.02156    0.01503   -0.00650
AFIX 137
H29A  2    0.415051    0.461781    0.462245    11.00000   -1.50000
H29B  2    0.411177    0.481343    0.660250    11.00000   -1.50000
H29C  2    0.376867    0.519745    0.498279    11.00000   -1.50000
HKLF 4
 
REM  ABS in P21/c #14
REM R1 =  0.0294 for   4163 Fo > 4sig(Fo)  and  0.0430 for all   5066 data
REM    338 parameters refined using      0 restraints
 
END  
     
WGHT      0.0308      1.4081 
REM Highest difference peak  0.305,  deepest hole -0.224,  1-sigma level  0.057
Q1    1   0.0044  0.6217  0.6417  11.00000  0.05    0.30
Q2    1   0.4013  0.5132  0.6157  11.00000  0.05    0.29
Q3    1   0.2429  0.7096  0.5039  11.00000  0.05    0.28
Q4    1   0.1764  0.6383  0.6601  11.00000  0.05    0.28
Q5    1   0.3376  0.6007  0.7377  11.00000  0.05    0.27
Q6    1   0.0335  0.4922  0.7268  11.00000  0.05    0.27
Q7    1  -0.0194  0.5260  0.6864  11.00000  0.05    0.26
Q8    1   0.0320  0.6680  0.6095  11.00000  0.05    0.26
Q9    1  -0.1057  0.7312  0.5339  11.00000  0.05    0.26
Q10   1   0.0248  0.4991  0.7872  11.00000  0.05    0.26
Q11   1   0.0285  0.6592  0.5684  11.00000  0.05    0.26
Q12   1   0.1223  0.6783  0.5981  11.00000  0.05    0.26
Q13   1  -0.0367  0.4039  0.7887  11.00000  0.05    0.25
Q14   1   0.4304  0.6117  0.7597  11.00000  0.05    0.25
Q15   1   0.2032  0.6706  0.5798  11.00000  0.05    0.25
Q16   1   0.3964  0.4920  0.4171  11.00000  0.05    0.24
Q17   1  -0.0187  0.7401  0.5387  11.00000  0.05    0.24
Q18   1   0.0510  0.7020  0.5217  11.00000  0.05    0.24
Q19   1   0.0633  0.5958  0.6989  11.00000  0.05    0.24
Q20   1   0.1361  0.5009  0.7568  11.00000  0.05    0.24

  REM The information below was added by Olex2.
  REM
  REM R1 = 0.0294 for 4163 Fo > 4sig(Fo) and 0.0430 for all 100158 data
  REM n/a parameters refined using n/a restraints
  REM Highest difference peak 0.30, deepest hole -0.22
  REM Mean Shift 0, Max Shift 0.001.
  
  REM +++ Tabular Listing of Refinement Information +++
  REM R1_all = 0.0430
  REM R1_gt = 0.0294
  REM wR_ref = 0.0699
  REM GOOF = 1.079
  REM Shift_max = 0.001
  REM Shift_mean = 0
  REM Reflections_all = 100158
  REM Reflections_gt = 4163
  REM Parameters = n/a
  REM Hole = -0.22
  REM Peak = 0.30
  REM Flack = n/a
  
  
;
_olex2_submission_special_instructions 'No special instructions were received'
loop_
  _refln_index_h
  _refln_index_k
  _refln_index_l
  _refln_F_squared_meas
  _refln_F_squared_sigma
 0 0 -1 -0.02 0.15
 0 0 -1 -0.06 0.11
 0 0 -1 0.14 0.16
 0 0 -1 -0.16 0.15
 0 0 1 0.03 0.14
 0 0 1 -0.02 0.14
 0 0 1 -0.05 0.16
 0 0 1 -0.05 0.14
 0 0 1 -0.24 0.15
 0 0 -2 29.83 0.76
 0 0 -2 29.97 0.72
 0 0 -2 29.25 0.75
 0 0 2 29.91 0.74
 0 0 2 28.73 0.73
 0 0 2 28.78 0.71
 0 0 2 30.2 0.77
 0 0 -3 0.22 0.29
 0 0 -3 0.09 0.28
 0 0 -3 0.16 0.23
 0 0 -3 0.06 0.35
 0 0 -3 0.13 0.28
 0 0 3 -0.04 0.23
 0 0 3 -0.14 0.29
 0 0 3 0.02 0.28
 0 0 3 0.01 0.26
 0 0 -4 146.37 3.31
 0 0 -4 145.82 2.64
 0 0 -4 144.56 2.64
 0 0 -4 147.86 2.68
 0 0 -4 145.11 2.77
 0 0 4 143.78 2.63
 0 0 4 146.36 2.67
 0 0 4 140.7 2.56
 0 0 -5 -0.04 0.32
 0 0 -5 0.57 0.3
 0 0 -5 0.59 0.36
 0 0 -5 0.23 0.36
 0 0 5 -0.36 0.35
 0 0 5 0.31 0.36
 0 0 5 0.26 0.36
 0 0 -6 1.47 0.45
 0 0 -6 0.59 0.58
 0 0 -6 0.76 0.45
 0 0 -6 1.71 0.48
 0 0 -6 1.16 0.45
 0 0 6 1.44 0.45
 0 0 6 1.14 0.45
 0 0 6 1.43 0.5
 0 0 -7 -0.29 0.66
 0 0 -7 0.42 0.54
 0 0 -7 0.22 0.48
 0 0 -7 0.38 0.52
 0 0 -7 0.72 0.55
 0 0 7 -0.25 0.26
 0 0 7 -0.72 0.49
 0 0 7 0.13 0.47
 0 0 7 -0.1 0.58
 0 0 -8 5.3 0.84
 0 0 -8 2.09 0.69
 0 0 -8 1.35 0.95
 0 0 -8 4.03 0.76
 0 0 -8 3.32 0.78
 0 0 8 2.22 0.79
 0 0 8 2.1 0.63
 0 0 8 2.47 0.62
 0 0 8 2.15 0.74
 0 0 8 3.82 0.92
 0 0 -9 1.76 0.94
 0 0 -9 -2.41 1.13
 0 0 -9 0.4 0.93
 0 0 9 -1.44 0.99
 0 0 9 0.5 1.09
 0 0 9 -0.95 0.9
 1 0 9 -0.74 0.99
 1 0 9 0.55 1.09
 1 0 9 0.13 1.02
 -1 0 -9 0.79 1
 -1 0 -9 -0.04 1.31
 -1 0 -9 -1.57 0.98
 1 0 8 1.8 0.83
 1 0 8 1.36 0.74
 1 0 8 1 0.75
 1 0 8 2.41 0.69
 1 0 8 1.49 0.42
 1 0 8 1.15 0.63
 -1 0 -8 1.29 0.76
 -1 0 -8 -0.36 0.91
 -1 0 -8 2.52 0.75
 -1 0 -8 0.26 0.67
 -1 0 -8 1.73 0.73
 1 0 7 -0.51 0.44
 1 0 7 -0.28 0.42
 1 0 7 -0.39 0.51
 1 0 7 -0.41 0.56
 1 0 7 -0.2 0.52
 -1 0 -7 0.71 0.56
 -1 0 -7 0.24 0.57
 -1 0 -7 0.29 0.51
 -1 0 -7 -0.16 0.66
 -1 0 -7 -0.2 0.5
 1 0 6 17.89 0.88
 1 0 6 19.1 0.93
 1 0 6 16.4 0.93
 1 0 6 13.5 0.94
 -1 0 -6 16.45 0.93
 -1 0 -6 18.07 1.31
 -1 0 -6 18.77 0.99
 -1 0 -6 16.82 0.95
 1 0 5 -0.06 0.36
 1 0 5 -0.06 0.35
 1 0 5 -0.26 0.32
 -1 0 -5 0.13 0.36
 -1 0 -5 0.3 0.37
 -1 0 -5 0.01 0.32
 -1 0 -5 0.21 0.38
 -1 0 -5 -0.18 0.44
 1 0 4 6.1 0.61
 1 0 4 6.67 0.6
 1 0 4 5.83 0.54
 -1 0 -4 8.25 0.9
 -1 0 -4 6.74 0.6
 -1 0 -4 6.5 0.56
 -1 0 -4 5.94 0.5
 -1 0 -4 6.44 0.59
 1 0 3 0.47 0.26
 1 0 3 -0.26 0.29
 1 0 3 0.02 0.27
 1 0 3 -0.06 0.3
 -1 0 -3 -0.5 0.28
 -1 0 -3 0.25 0.39
 -1 0 -3 -0.14 0.31
 -1 0 -3 -0.07 0.22
 -1 0 -3 0.36 0.28
 -1 0 -3 -0.09 0.26
 1 0 2 343.41 5.34
 1 0 2 344.94 5.33
 1 0 2 351.28 5.21
 1 0 2 347.23 5.35
 1 0 2 334.45 5.29
 -1 0 -2 348.41 5.93
 -1 0 -2 348.34 5.34
 -1 0 -2 356.23 5.35
 -1 0 -2 345.36 6.73
 -1 0 -2 346.57 5.35
 -1 0 -2 341.88 5.3
 1 0 1 0.11 0.17
 1 0 1 -0.06 0.15
 1 0 1 -0.07 0.1
 1 0 1 0.16 0.19
 1 0 1 0.06 0.19
 1 0 1 0.05 0.15
 1 0 1 0.03 0.11
 -1 0 -1 -0.06 0.15
 -1 0 -1 0.43 0.27
 -1 0 -1 -0.1 0.15
 -1 0 -1 -0.12 0.19
 -1 0 -1 0.1 0.2
 -1 0 -1 0.03 0.18
 1 0 -1 -0.14 0.13
 1 0 -1 -0.13 0.04
 1 0 -1 -0.14 0.15
 -1 0 1 -0.2 0.13
 1 0 -2 0.39 0.27
 1 0 -2 0.56 0.21
 1 0 -2 0.12 0.26
 -1 0 2 0 0.26
 -1 0 2 0.12 0.24
 -1 0 2 0.12 0.26
 1 0 -3 0.26 0.28
 1 0 -3 0.06 0.23
 1 0 -3 0.27 0.3
 1 0 -3 -0.12 0.3
 -1 0 3 0.05 0.24
 -1 0 3 0.03 0.29
 -1 0 3 0.39 0.3
 1 0 -4 54.15 1.61
 1 0 -4 51.58 1.26
 1 0 -4 50.94 1.22
 1 0 -4 50.42 1.27
 1 0 -4 52.42 1.11
 -1 0 4 51.17 1.23
 -1 0 4 51.09 1.26
 -1 0 4 52.01 1.21
 -1 0 4 50.82 1.27
 1 0 -5 -0.31 0.36
 1 0 -5 0.23 0.32
 1 0 -5 0.43 0.43
 1 0 -5 0.5 0.38
 1 0 -5 -0.04 0.33
 -1 0 5 0.65 0.34
 -1 0 5 -0.31 0.37
 -1 0 5 0.27 0.34
 -1 0 5 0.26 0.35
 1 0 -6 5.47 0.65
 1 0 -6 3.86 0.5
 1 0 -6 3.49 0.54
 1 0 -6 4 0.53
 1 0 -6 3.83 0.69
 -1 0 6 4.01 0.58
 -1 0 6 4.17 0.58
 -1 0 6 4.07 0.57
 1 0 -7 -0.39 0.5
 1 0 -7 0.14 0.45
 1 0 -7 0.09 0.5
 1 0 -7 0.63 0.51
 1 0 -7 -0.42 0.72
 -1 0 7 0.57 0.55
 -1 0 7 0.08 0.47
 -1 0 7 -1.09 0.43
 1 0 -8 17.14 1.17
 1 0 -8 18.46 1.24
 1 0 -8 17.15 1.23
 1 0 -8 16.68 1.27
 1 0 -8 15.91 1.88
 -1 0 8 18.45 1.26
 -1 0 8 16.62 1.39
 -1 0 8 20.23 1.27
 1 0 -9 -0.53 0.9
 1 0 -9 1.28 0.89
 1 0 -9 0.35 0.93
 1 0 -9 -2.23 1.14
 -1 0 9 -0.82 1.09
 -1 0 9 -0.5 1.01
 -1 0 9 -0.17 0.83
 -1 0 9 -1.34 0.82
 2 0 9 -0.13 1.09
 2 0 9 1.07 0.96
 2 0 9 -0.19 1.1
 -2 0 -9 -1.53 1.14
 -2 0 -9 -0.43 1.01
 2 0 8 10.98 0.93
 2 0 8 11.1 1.27
 2 0 8 14.07 1.14
 2 0 8 12.47 1.34
 2 0 8 11.85 1.38
 2 0 8 14.19 1.16
 -2 0 -8 14.34 1.31
 -2 0 -8 12.26 1.15
 -2 0 -8 14.43 1.43
 -2 0 -8 10.3 1.07
 2 0 7 0.03 0.59
 2 0 7 -0.38 0.48
 2 0 7 0.05 0.48
 2 0 7 0.49 0.52
 2 0 7 0.09 0.63
 -2 0 -7 -0.72 0.63
 -2 0 -7 0.44 0.6
 -2 0 -7 -0.73 0.44
 -2 0 -7 1.09 0.55
 2 0 6 0.76 0.42
 2 0 6 1.17 0.42
 2 0 6 0.5 0.41
 2 0 6 0.79 0.5
 2 0 6 1 0.5
 -2 0 -6 1.08 0.47
 -2 0 -6 1.99 0.55
 -2 0 -6 0.97 0.45
 -2 0 -6 0.11 0.53
 -2 0 -6 1.44 0.45
 2 0 5 0.64 0.37
 2 0 5 -0.22 0.29
 2 0 5 -0.05 0.33
 2 0 5 0.13 0.35
 2 0 5 -0.56 0.36
 2 0 5 -0.23 0.34
 -2 0 -5 -0.46 0.3
 -2 0 -5 0.54 0.36
 -2 0 -5 -0.11 0.48
 -2 0 -5 0.09 0.41
 -2 0 -5 -0.38 0.39
 2 0 4 39.54 1.04
 2 0 4 40.31 1.1
 2 0 4 40.01 1.13
 2 0 4 39.51 1.07
 2 0 4 40.76 1.11
 2 0 4 37.89 0.94
 -2 0 -4 42.6 1.51
 -2 0 -4 39.69 1.11
 -2 0 -4 40.45 1.11
 -2 0 -4 39.17 1.08
 -2 0 -4 40.15 1.05
 -2 0 -4 39.35 1.05
 2 0 3 0 0.3
 2 0 3 -0.01 0.26
 2 0 3 -0.41 0.25
 2 0 3 -0.06 0.19
 2 0 3 -0.27 0.3
 2 0 3 -0.44 0.28
 -2 0 -3 0.43 0.4
 -2 0 -3 0.16 0.26
 -2 0 -3 -0.05 0.31
 -2 0 -3 -0.35 0.3
 -2 0 -3 0.04 0.23
 -2 0 -3 0.09 0.26
 2 0 2 12.49 0.53
 2 0 2 12.8 0.5
 2 0 2 12.38 0.55
 2 0 2 12.41 0.38
 2 0 2 12.43 0.37
 2 0 2 13.17 0.59
 2 0 2 12 0.49
 -2 0 -2 12.88 0.6
 -2 0 -2 12.15 0.54
 -2 0 -2 12.84 0.51
 -2 0 -2 12.3 0.53
 -2 0 -2 12.84 0.5
 -2 0 -2 13.32 0.83
 2 0 1 0.11 0.16
 2 0 1 -0.33 0.24
 2 0 1 0.48 0.22
 2 0 1 -0.29 0.24
 2 0 1 -0.09 0.21
 -2 0 -1 -0.04 0.16
 -2 0 -1 -0.08 0.1
 -2 0 -1 -0.01 0.25
 -2 0 -1 -0.11 0.25
 -2 0 -1 0.41 0.3
 -2 0 -1 -0.23 0.15
 -2 0 -1 -0.15 0.21
 -2 0 -1 0.14 0.23
 2 0 0 132.82 2.08
 2 0 0 135.43 2.55
 2 0 0 135.89 2.09
 2 0 0 129.14 2.13
 2 0 0 128.94 2.06
 -2 0 0 130.9 2.08
 -2 0 0 133.73 2.08
 -2 0 0 131.87 2.08
 -2 0 0 133.88 2.54
 -2 0 0 130.08 2.06
 2 0 -1 -0.04 0.18
 2 0 -1 0.32 0.21
 2 0 -1 -0.13 0.19
 -2 0 1 0.06 0.08
 -2 0 1 0.07 0.2
 -2 0 1 -0.08 0.18
 -2 0 1 0.26 0.19
 2 0 -2 84.22 1.37
 2 0 -2 83.75 1.33
 2 0 -2 79.52 1.51
 2 0 -2 83.34 1.47
 -2 0 2 80.44 1.52
 -2 0 2 79.44 1.36
 -2 0 2 82.92 1.47
 2 0 -3 0.02 0.31
 2 0 -3 0.22 0.23
 2 0 -3 0.11 0.27
 -2 0 3 -0.04 0.31
 -2 0 3 0.47 0.29
 -2 0 3 -0.17 0.27
 2 0 -4 2.06 0.36
 2 0 -4 2.2 0.39
 2 0 -4 1.81 0.31
 2 0 -4 2.09 0.46
 2 0 -4 1.47 0.38
 -2 0 4 1.49 0.35
 -2 0 4 2.17 0.36
 -2 0 4 1.99 0.42
 2 0 -5 0.3 0.37
 2 0 -5 -0.11 0.33
 2 0 -5 -0.02 0.29
 2 0 -5 0.01 0.45
 2 0 -5 -0.22 0.33
 -2 0 5 -0.29 0.34
 -2 0 5 0.48 0.38
 -2 0 5 -0.1 0.37
 -2 0 5 -0.66 0.33
 2 0 -6 19.81 0.92
 2 0 -6 19.12 0.99
 2 0 -6 20.05 0.85
 2 0 -6 18.22 0.89
 2 0 -6 19.88 0.59
 2 0 -6 21.15 1.36
 -2 0 6 19.82 0.94
 -2 0 6 22.55 1.03
 -2 0 6 18.98 0.96
 -2 0 6 16.97 0.93
 2 0 -7 -0.27 0.51
 2 0 -7 0.42 0.52
 2 0 -7 0.67 0.73
 2 0 -7 0.02 0.47
 2 0 -7 -0.21 0.53
 -2 0 7 -0.06 0.53
 -2 0 7 1.57 0.56
 -2 0 7 0.51 0.55
 -2 0 7 -0.49 0.47
 2 0 -8 2.95 0.77
 2 0 -8 0.59 0.94
 2 0 -8 1.94 0.78
 2 0 -8 1.19 0.76
 2 0 -8 1.79 0.65
 -2 0 8 3.16 0.81
 -2 0 8 1.1 0.69
 -2 0 8 0.95 0.65
 2 0 -9 0.87 0.96
 2 0 -9 0.13 0.92
 2 0 -9 -1.02 1.22
 2 0 -9 0.73 1.06
 -2 0 9 -1.29 0.76
 -2 0 9 0.77 0.95
 -2 0 9 -0.31 1.1
 3 0 8 0.26 0.81
 3 0 8 -0.05 0.84
 3 0 8 0.78 0.65
 3 0 8 1.5 0.68
 3 0 8 -1.02 0.59
 -3 0 -8 -1.31 0.87
 -3 0 -8 -1.81 0.77
 -3 0 -8 -0.68 0.58
 -3 0 -8 0.69 0.62
 3 0 7 -0.13 0.6
 3 0 7 -0.01 0.47
 3 0 7 -0.26 0.5
 3 0 7 0.32 0.49
 3 0 7 0.97 0.62
 -3 0 -7 -1.36 0.6
 -3 0 -7 -0.73 0.54
 -3 0 -7 0.16 0.54
 -3 0 -7 -0.85 0.45
 -3 0 -7 -0.64 0.61
 3 0 6 3.67 0.53
 3 0 6 4.45 0.64
 3 0 6 3.73 0.48
 3 0 6 2.9 0.58
 -3 0 -6 3.13 0.58
 -3 0 -6 3.37 0.58
 -3 0 -6 2.5 0.7
 -3 0 -6 2.62 0.51
 -3 0 -6 3.58 0.54
 3 0 5 0.04 0.3
 3 0 5 -0.37 0.34
 3 0 5 0.42 0.39
 3 0 5 0.16 0.36
 3 0 5 -0.16 0.39
 3 0 5 0.02 0.37
 -3 0 -5 -0.14 0.33
 -3 0 -5 0.32 0.51
 -3 0 -5 -0.53 0.33
 -3 0 -5 -0.22 0.38
 -3 0 -5 -0.2 0.41
 -3 0 -5 0 0.43
 3 0 4 30.9 1.01
 3 0 4 30.15 0.76
 3 0 4 31.3 0.92
 3 0 4 30.11 0.94
 3 0 4 30.35 1.02
 3 0 4 29.91 0.97
 -3 0 -4 29.8 0.99
 -3 0 -4 30.48 0.94
 -3 0 -4 29.99 0.92
 -3 0 -4 28.84 0.99
 -3 0 -4 30.88 1.3
 -3 0 -4 29.81 0.92
 3 0 3 -0.11 0.17
 3 0 3 0.23 0.32
 3 0 3 0.32 0.26
 3 0 3 0.39 0.27
 3 0 3 0.17 0.17
 3 0 3 0.46 0.32
 3 0 3 0.23 0.3
 -3 0 -3 0.34 0.4
 -3 0 -3 1.04 0.33
 -3 0 -3 1.19 0.31
 -3 0 -3 0.39 0.33
 -3 0 -3 0.05 0.26
 3 0 2 24.45 0.66
 3 0 2 25.08 0.62
 3 0 2 25.57 0.72
 3 0 2 24.74 0.7
 3 0 2 24.57 0.75
 3 0 2 25.13 0.75
 -3 0 -2 23.97 0.68
 -3 0 -2 24.66 0.74
 -3 0 -2 24.7 0.71
 -3 0 -2 24.56 0.75
 -3 0 -2 26.39 1.04
 -3 0 -2 24.81 0.66
 3 0 1 -0.39 0.19
 3 0 1 -0.3 0.27
 3 0 1 -0.06 0.27
 3 0 1 -0.51 0.16
 3 0 1 -0.46 0.25
 3 0 1 -0.32 0.25
 -3 0 -1 -0.39 0.2
 -3 0 -1 -0.24 0.25
 -3 0 -1 0.31 0.32
 -3 0 -1 -0.28 0.28
 -3 0 -1 -0.51 0.25
 -3 0 -1 -0.48 0.26
 3 0 0 35.46 0.81
 3 0 0 35.72 0.8
 3 0 0 36.87 0.8
 3 0 0 36.57 0.8
 3 0 0 37.2 0.89
 -3 0 0 37.36 0.81
 -3 0 0 36.09 0.81
 -3 0 0 36.17 0.8
 -3 0 0 36.23 0.87
 -3 0 0 36.35 0.76
 3 0 -1 0.01 0.21
 3 0 -1 -0.25 0.07
 3 0 -1 -0.3 0.21
 3 0 -1 0.05 0.26
 3 0 -1 0 0.13
 3 0 -1 -0.26 0.22
 -3 0 1 -0.23 0.21
 -3 0 1 -0.17 0.21
 -3 0 1 -0.24 0.22
 3 0 -2 31.78 0.76
 3 0 -2 32.55 0.76
 3 0 -2 32.61 0.83
 -3 0 2 32.79 0.55
 -3 0 2 32.32 0.74
 -3 0 2 32.96 0.82
 -3 0 2 32.09 0.76
 3 0 -3 -0.04 0.3
 3 0 -3 -0.05 0.27
 3 0 -3 -0.04 0.24
 3 0 -3 0.1 0.28
 -3 0 3 -0.21 0.27
 -3 0 3 0.06 0.25
 -3 0 3 -0.06 0.29
 3 0 -4 20.1 0.67
 3 0 -4 18.92 0.76
 3 0 -4 20.36 0.95
 3 0 -4 18.59 0.8
 -3 0 4 19.18 0.83
 -3 0 4 18.84 0.76
 -3 0 4 19.97 0.86
 3 0 -5 -0.12 0.44
 3 0 -5 -0.41 0.33
 3 0 -5 -0.23 0.35
 3 0 -5 0.15 0.31
 3 0 -5 -0.17 0.35
 -3 0 5 -0.5 0.32
 -3 0 5 -0.27 0.35
 -3 0 5 0.1 0.36
 3 0 -6 0.43 0.57
 3 0 -6 -0.01 0.4
 3 0 -6 -0.16 0.39
 3 0 -6 -0.14 0.45
 3 0 -6 0.29 0.41
 -3 0 6 0.27 0.44
 -3 0 6 -0.04 0.41
 -3 0 6 0.04 0.43
 -3 0 6 -0.23 0.38
 3 0 -7 0.48 0.53
 3 0 -7 -0.5 0.4
 3 0 -7 -0.34 0.67
 3 0 -7 0.78 0.55
 3 0 -7 -0.19 0.3
 3 0 -7 -0.07 0.52
 -3 0 7 -0.91 0.52
 -3 0 7 -0.09 0.57
 -3 0 7 0.77 0.54
 -3 0 7 -0.57 0.43
 3 0 -8 1.37 0.79
 3 0 -8 0.59 0.6
 3 0 -8 0.37 0.73
 3 0 -8 1.13 0.7
 3 0 -8 -0.16 0.94
 -3 0 8 0.67 0.64
 -3 0 8 0.99 0.73
 -3 0 8 0.44 0.68
 -3 0 8 1 0.78
 3 0 -9 -1.77 1.17
 3 0 -9 -0.55 0.93
 3 0 -9 -0.97 0.87
 3 0 -9 -1.8 0.96
 -3 0 9 0.83 1.07
 -3 0 9 -1.21 0.98
 4 0 8 8.61 1.04
 4 0 8 9.71 1.17
 4 0 8 5.58 1
 4 0 8 7.85 1.07
 4 0 8 10.47 1.12
 -4 0 -8 3.85 0.97
 -4 0 -8 7.44 0.88
 -4 0 -8 7.08 1.09
 -4 0 -8 5.88 0.81
 4 0 7 -0.58 0.65
 4 0 7 -0.21 0.49
 4 0 7 -0.78 0.44
 4 0 7 -1.24 0.5
 4 0 7 -0.25 0.64
 -4 0 -7 -0.35 0.52
 -4 0 -7 -0.19 0.66
 -4 0 -7 -0.22 0.64
 -4 0 -7 -0.01 0.51
 -4 0 -7 1.55 0.6
 4 0 6 -0.23 0.44
 4 0 6 0.51 0.52
 4 0 6 0.26 0.53
 4 0 6 0.33 0.41
 4 0 6 -0.22 0.34
 4 0 6 -0.94 0.42
 -4 0 -6 -0.12 0.38
 -4 0 -6 -0.54 0.5
 -4 0 -6 -0.25 0.51
 -4 0 -6 -0.29 0.52
 -4 0 -6 0.25 0.49
 -4 0 -6 -0.08 0.44
 4 0 5 0.31 0.39
 4 0 5 -0.15 0.4
 4 0 5 0.21 0.37
 4 0 5 -0.61 0.36
 4 0 5 0 0.26
 4 0 5 0.39 0.41
 -4 0 -5 -0.4 0.42
 -4 0 -5 -0.41 0.4
 -4 0 -5 0.06 0.4
 -4 0 -5 -0.45 0.48
 -4 0 -5 0.16 0.37
 -4 0 -5 0.22 0.37
 4 0 4 93.62 1.73
 4 0 4 97.91 1.95
 4 0 4 98.88 1.96
 4 0 4 95.14 2.04
 4 0 4 95.32 1.95
 4 0 4 95.97 2.06
 -4 0 -4 99.31 2.06
 -4 0 -4 99.18 1.95
 -4 0 -4 97.22 2.05
 -4 0 -4 98.43 1.96
 -4 0 -4 99.8 2.64
 4 0 3 -0.01 0.29
 4 0 3 -0.34 0.21
 4 0 3 -0.01 0.26
 4 0 3 -0.05 0.32
 4 0 3 0 0.31
 4 0 3 -0.21 0.3
 -4 0 -3 -0.1 0.29
 -4 0 -3 -0.11 0.25
 -4 0 -3 -0.51 0.2
 -4 0 -3 0.07 0.33
 -4 0 -3 0.7 0.42
 -4 0 -3 0.16 0.3
 -4 0 -3 0.11 0.31
 4 0 2 46.19 1.1
 4 0 2 44.83 1.05
 4 0 2 47.5 1.01
 4 0 2 46.6 1.1
 4 0 2 46.78 0.96
 4 0 2 46.31 1.05
 -4 0 -2 46.21 1.05
 -4 0 -2 45.32 0.93
 -4 0 -2 47.02 1.1
 -4 0 -2 45.57 1.05
 -4 0 -2 48.4 1.43
 -4 0 -2 45.89 1.11
 -4 0 -2 47.07 0.84
 4 0 1 0.2 0.28
 4 0 1 -0.06 0.28
 4 0 1 -0.01 0.27
 4 0 1 -0.29 0.22
 4 0 1 0.13 0.25
 -4 0 -1 0.11 0.29
 -4 0 -1 -0.15 0.22
 -4 0 -1 -0.03 0.29
 -4 0 -1 -0.25 0.26
 -4 0 -1 0.32 0.27
 -4 0 -1 0.05 0.27
 4 0 0 52.98 1.1
 4 0 0 52.71 1.09
 4 0 0 54.23 1.23
 4 0 0 53.6 1.1
 4 0 0 52.37 1.1
 -4 0 0 51.32 1.07
 -4 0 0 54.73 1.11
 -4 0 0 53.13 1.21
 -4 0 0 50.83 1.04
 -4 0 0 52.63 1.12
 4 0 -1 0.1 0.23
 4 0 -1 0.05 0.25
 4 0 -1 0.2 0.1
 4 0 -1 -0.54 0.25
 4 0 -1 0.24 0.24
 -4 0 1 -0.01 0.23
 -4 0 1 -0.06 0.24
 -4 0 1 0.44 0.3
 -4 0 1 -0.03 0.24
 4 0 -2 0.2 0.25
 4 0 -2 -0.23 0.27
 4 0 -2 0.37 0.26
 -4 0 2 0.31 0.25
 -4 0 2 -0.01 0.28
 -4 0 2 0.44 0.27
 -4 0 2 -0.16 0.26
 4 0 -3 1.72 0.35
 4 0 -3 2.36 0.34
 4 0 -4 3.68 0.42
 4 0 -4 4.32 0.48
 4 0 -4 4.51 0.65
 4 0 -4 3.91 0.44
 -4 0 4 3.63 0.41
 -4 0 4 3.57 0.47
 -4 0 4 3.64 0.38
 4 0 -5 0.1 0.37
 4 0 -5 -0.29 0.35
 4 0 -5 0.41 0.43
 4 0 -5 0.15 0.33
 4 0 -5 -0.06 0.34
 -4 0 5 -0.4 0.36
 -4 0 5 -0.01 0.33
 -4 0 5 0.05 0.37
 4 0 -6 2.41 0.49
 4 0 -6 3.1 0.56
 4 0 -6 2.73 0.53
 4 0 -6 3.03 0.56
 4 0 -6 2.49 0.5
 4 0 -6 2.43 0.61
 -4 0 6 3.13 0.59
 -4 0 6 3.15 0.55
 -4 0 6 3.16 0.57
 4 0 -7 -0.48 0.47
 4 0 -7 -0.1 0.53
 4 0 -7 -0.11 0.68
 4 0 -7 0.49 0.53
 4 0 -7 0.37 0.57
 4 0 -7 -0.34 0.4
 4 0 -7 -0.38 0.56
 -4 0 7 0.27 0.46
 -4 0 7 -0.67 0.59
 -4 0 7 0.92 0.61
 -4 0 7 -0.02 0.58
 4 0 -8 5.28 0.86
 4 0 -8 6.24 0.96
 4 0 -8 4.94 0.83
 4 0 -8 4.84 0.62
 4 0 -8 5.17 0.8
 4 0 -8 2.93 1.03
 4 0 -8 4.42 0.75
 -4 0 8 5.04 0.73
 -4 0 8 4.39 0.89
 -4 0 8 3.77 0.88
 -4 0 8 6.58 0.96
 4 0 -9 0.47 0.92
 4 0 -9 -1.22 1.21
 4 0 -9 0.73 1
 4 0 -9 -0.12 1.05
 4 0 -9 -0.68 1.04
 -4 0 9 -0.44 0.94
 -4 0 9 -1.37 1.01
 5 0 8 1.87 0.98
 5 0 8 2.9 0.8
 5 0 8 1.48 1.03
 -5 0 -8 3.18 0.85
 -5 0 -8 1.78 0.69
 -5 0 -8 2.91 0.62
 -5 0 -8 4.45 1.09
 5 0 7 -0.28 0.56
 5 0 7 -0.31 0.66
 5 0 7 -0.54 0.72
 5 0 7 0.25 0.55
 -5 0 -7 -0.54 0.5
 -5 0 -7 0.3 0.58
 -5 0 -7 -0.61 0.65
 -5 0 -7 0.88 0.75
 -5 0 -7 0.73 0.61
 5 0 6 8.72 0.79
 5 0 6 8.08 0.99
 5 0 6 7.95 1
 5 0 6 9.08 0.86
 5 0 6 8.06 0.76
 -5 0 -6 11.13 0.94
 -5 0 -6 9.02 0.9
 -5 0 -6 9.55 0.97
 -5 0 -6 8.81 1.1
 -5 0 -6 9.99 1.03
 -5 0 -6 7.58 0.75
 5 0 5 0.11 0.42
 5 0 5 -0.18 0.4
 5 0 5 -0.41 0.41
 5 0 5 -0.04 0.46
 5 0 5 -0.43 0.4
 -5 0 -5 0.03 0.41
 -5 0 -5 0.58 0.44
 -5 0 -5 0.29 0.46
 -5 0 -5 -0.42 0.5
 -5 0 -5 0.21 0.44
 -5 0 -5 -0.01 0.44
 5 0 4 1.87 0.42
 5 0 4 1.91 0.39
 5 0 4 1.32 0.41
 5 0 4 1.8 0.4
 5 0 4 1.96 0.31
 5 0 4 1.84 0.43
 -5 0 -4 2.34 0.46
 -5 0 -4 1.71 0.45
 -5 0 -4 1.85 0.53
 -5 0 -4 2.16 0.3
 -5 0 -4 1.83 0.37
 -5 0 -4 1.83 0.42
 5 0 3 0.28 0.35
 5 0 3 -0.57 0.27
 5 0 3 0.66 0.34
 5 0 3 -0.06 0.27
 5 0 3 0.54 0.36
 -5 0 -3 0.36 0.25
 -5 0 -3 0.84 0.35
 -5 0 -3 0.2 0.4
 -5 0 -3 1.04 0.34
 -5 0 -3 0.41 0.35
 -5 0 -3 0.68 0.35
 5 0 2 50.03 1.2
 5 0 2 49.2 1.03
 5 0 2 50.81 1.24
 5 0 2 50.66 1.13
 5 0 2 48.31 1.16
 5 0 2 49.29 1.15
 -5 0 -2 50.88 1.23
 -5 0 -2 50.14 1.51
 -5 0 -2 50.47 1.21
 -5 0 -2 50.55 0.92
 -5 0 -2 51.89 1.19
 -5 0 -2 50.42 1.17
 -5 0 -2 49.97 1.04
 5 0 1 0.63 0.3
 5 0 1 -0.24 0.25
 5 0 1 -0.2 0.28
 5 0 1 0.09 0.29
 -5 0 -1 -0.15 0.3
 -5 0 -1 -0.01 0.3
 -5 0 -1 0.14 0.31
 -5 0 -1 -0.13 0.25
 -5 0 -1 -0.1 0.3
 -5 0 -1 -0.49 0.3
 5 0 0 26.53 0.77
 5 0 0 27.28 0.79
 5 0 0 26.47 0.77
 5 0 0 25.58 0.78
 -5 0 0 27.45 0.8
 -5 0 0 26.07 0.82
 -5 0 0 25.64 0.75
 -5 0 0 26.32 0.8
 -5 0 0 26.19 0.73
 5 0 -1 -0.12 0.23
 5 0 -1 0.03 0.14
 5 0 -1 -0.08 0.26
 5 0 -1 0.45 0.28
 5 0 -1 -0.16 0.27
 -5 0 1 -0.22 0.25
 -5 0 1 0.06 0.14
 -5 0 1 0.51 0.28
 -5 0 1 -0.03 0.28
 -5 0 1 0.05 0.3
 -5 0 1 -0.01 0.27
 -5 0 1 0.02 0.12
 5 0 -2 18.86 0.46
 5 0 -2 19.57 0.66
 5 0 -2 19.73 0.71
 5 0 -2 19.06 0.65
 5 0 -2 20.37 0.7
 5 0 -2 18.8 0.41
 -5 0 2 18.77 0.64
 -5 0 2 18.98 0.65
 -5 0 2 18.48 0.65
 5 0 -3 -0.19 0.3
 5 0 -3 -0.05 0.29
 5 0 -3 0.02 0.31
 5 0 -3 -0.13 0.21
 -5 0 3 -0.15 0.27
 -5 0 3 0.1 0.26
 -5 0 3 -0.32 0.3
 5 0 -4 73.1 1.66
 5 0 -4 74.19 1.78
 5 0 -4 73.88 1.57
 5 0 -4 71.16 1.28
 5 0 -4 72.11 1.57
 -5 0 4 71.93 1.47
 -5 0 4 72.81 1.65
 -5 0 4 72.41 1.18
 -5 0 4 72.35 1.58
 5 0 -5 0.02 0.4
 5 0 -5 0.18 0.4
 5 0 -5 0.06 0.39
 5 0 -5 -0.1 0.41
 -5 0 5 -0.37 0.37
 -5 0 5 0.15 0.35
 -5 0 5 -0.48 0.33
 -5 0 5 0.48 0.41
 5 0 -6 4.94 0.63
 5 0 -6 3.24 0.61
 5 0 -6 3.59 0.64
 5 0 -6 3.96 0.6
 -5 0 6 3.75 0.57
 -5 0 6 3.93 0.66
 -5 0 6 3.65 0.59
 5 0 -7 -0.49 0.51
 5 0 -7 0.22 0.59
 5 0 -7 -0.31 0.48
 5 0 -7 0.25 0.63
 5 0 -7 -0.6 0.67
 5 0 -7 -0.75 0.55
 -5 0 7 0.83 0.49
 -5 0 7 1.12 0.63
 -5 0 7 -0.27 0.54
 5 0 -8 18.4 1.31
 5 0 -8 14.97 1.36
 5 0 -8 13.63 1.75
 5 0 -8 20.11 1.22
 5 0 -8 18.91 1.46
 5 0 -8 15.31 0.94
 -5 0 8 15.87 1.49
 -5 0 8 13.84 1.17
 -5 0 8 16.03 1.35
 -5 0 8 16.89 1.43
 5 0 -9 -1.66 1.25
 5 0 -9 -1.17 1
 5 0 -9 -0.55 1
 5 0 -9 -0.23 1.08
 -5 0 9 1.08 1.1
 -5 0 9 0.43 1.13
 -5 0 9 -1.84 1
 6 0 8 -0.17 1.02
 6 0 8 0.69 1.11
 -6 0 -8 0.8 0.83
 6 0 7 0.75 0.84
 6 0 7 0.01 0.55
 6 0 7 0.02 0.73
 6 0 7 0.57 0.57
 6 0 7 1.02 0.63
 -6 0 -7 -1.18 0.66
 -6 0 -7 -0.45 0.79
 -6 0 -7 0.11 0.66
 -6 0 -7 0.94 0.53
 -6 0 -7 0.48 0.67
 -6 0 -7 0.63 0.47
 6 0 6 29.34 1.23
 6 0 6 23.79 1.25
 6 0 6 28.85 1.18
 6 0 6 31.1 1.29
 6 0 6 30.64 1.33
 -6 0 -6 29.32 1.34
 -6 0 -6 28.62 0.88
 -6 0 -6 29.57 1.27
 -6 0 -6 25.05 1.56
 -6 0 -6 28.6 1.19
 -6 0 -6 29.28 1.31
 6 0 5 -0.34 0.39
 6 0 5 -0.62 0.43
 6 0 5 0.26 0.38
 6 0 5 0.46 0.53
 6 0 5 0.19 0.44
 -6 0 -5 -0.11 0.5
 -6 0 -5 0.44 0.51
 -6 0 -5 1.24 0.46
 -6 0 -5 0.47 0.34
 -6 0 -5 0.36 0.46
 6 0 4 11.81 0.73
 6 0 4 12.22 0.72
 6 0 4 13.07 0.8
 6 0 4 11.47 0.76
 6 0 4 11.48 0.62
 6 0 4 12.5 0.75
 -6 0 -4 12.24 0.77
 -6 0 -4 11.36 0.58
 -6 0 -4 11.62 1.08
 -6 0 -4 12.1 0.76
 -6 0 -4 12.31 0.81
 -6 0 -4 12.11 0.77
 6 0 3 -0.03 0.33
 6 0 3 0.63 0.37
 6 0 3 0.15 0.36
 6 0 3 0.15 0.29
 6 0 3 -0.46 0.25
 6 0 3 0 0.31
 -6 0 -3 -0.46 0.34
 -6 0 -3 -0.55 0.37
 -6 0 -3 -0.03 0.33
 -6 0 -3 -0.29 0.31
 -6 0 -3 -0.07 0.26
 -6 0 -3 -0.19 0.3
 6 0 2 323.15 5.35
 6 0 2 313.8 5.26
 6 0 2 334.52 5.29
 6 0 2 322.72 5.06
 6 0 2 321.65 5.23
 6 0 2 320.16 5.15
 -6 0 -2 331.26 5.26
 -6 0 -2 322.91 5.27
 -6 0 -2 314.35 5.21
 -6 0 -2 331.01 6.59
 -6 0 -2 327.89 5.3
 -6 0 -2 324.11 5.16
 6 0 1 0.11 0.32
 6 0 1 0.15 0.32
 6 0 1 0.25 0.31
 6 0 1 -0.01 0.28
 -6 0 -1 0.08 0.31
 -6 0 -1 0.07 0.33
 -6 0 -1 -0.19 0.3
 -6 0 -1 0.17 0.31
 -6 0 -1 0.15 0.33
 6 0 0 38.95 1
 6 0 0 38.14 0.99
 6 0 0 37.86 1
 6 0 0 38.89 1.02
 -6 0 0 38.36 1.04
 -6 0 0 37.6 1
 -6 0 0 38.11 1.04
 -6 0 0 38.04 1.04
 -6 0 0 37.59 0.99
 -6 0 0 37.03 0.93
 6 0 -1 0.37 0.25
 6 0 -1 -0.12 0.29
 6 0 -1 0 0.3
 6 0 -1 0.14 0.29
 -6 0 1 0.23 0.33
 -6 0 1 0.07 0.29
 -6 0 1 -0.03 0.29
 -6 0 1 0.48 0.31
 -6 0 1 0.06 0.29
 -6 0 1 0.15 0.16
 6 0 -2 217.51 3.58
 6 0 -2 216.95 3.6
 6 0 -2 211.93 3.54
 6 0 -2 211.97 3.21
 -6 0 2 220.22 3.56
 -6 0 2 210.8 3.48
 -6 0 2 213.4 3.54
 6 0 -3 -0.06 0.3
 6 0 -3 0.22 0.19
 6 0 -3 0.03 0.29
 6 0 -3 -0.11 0.3
 6 0 -3 0.4 0.33
 -6 0 3 0.06 0.3
 -6 0 3 -0.08 0.28
 -6 0 3 -0.17 0.27
 -6 0 3 -0.11 0.28
 -6 0 3 0.11 0.29
 6 0 -4 17.46 0.76
 6 0 -4 17.13 0.56
 6 0 -4 16.98 0.75
 6 0 -4 17.44 0.8
 6 0 -4 16.39 0.75
 -6 0 4 17.11 0.76
 -6 0 4 16.58 0.78
 -6 0 4 17.88 0.73
 6 0 -5 -0.75 0.39
 6 0 -5 0.14 0.4
 6 0 -5 -0.19 0.39
 6 0 -5 0.19 0.36
 -6 0 5 0.02 0.36
 -6 0 5 -0.12 0.37
 -6 0 5 0.07 0.38
 -6 0 5 0.11 0.17
 6 0 -6 -0.06 0.5
 6 0 -6 0.45 0.5
 6 0 -6 0.61 0.49
 6 0 -6 1.15 0.53
 -6 0 6 -0.03 0.48
 -6 0 6 0.17 0.54
 -6 0 6 0.52 0.47
 6 0 -7 0.3 0.66
 6 0 -7 -0.45 0.6
 6 0 -7 -0.48 0.67
 6 0 -7 -1.26 0.45
 6 0 -7 0.3 0.63
 -6 0 7 1.31 0.7
 -6 0 7 0.06 0.65
 -6 0 7 -0.1 0.47
 6 0 -8 1.11 0.59
 6 0 -8 0.83 0.8
 6 0 -8 0.61 0.64
 6 0 -8 1.46 0.84
 6 0 -8 0.09 0.86
 6 0 -8 0.1 0.88
 -6 0 8 0.39 0.88
 -6 0 8 0.85 0.83
 -6 0 8 1.37 0.92
 -6 0 8 0.33 0.61
 6 0 -9 1.16 1.09
 6 0 -9 0.8 1.18
 6 0 -9 0.16 1.01
 6 0 -9 -1.77 1.23
 -6 0 9 -2.47 1.12
 -6 0 9 1.29 1.14
 7 0 7 0.12 0.86
 7 0 7 -0.34 0.62
 7 0 7 -1.04 0.76
 7 0 7 0.2 0.69
 7 0 7 0.99 0.7
 -7 0 -7 -0.6 0.74
 -7 0 -7 -0.22 0.66
 -7 0 -7 -0.63 0.86
 -7 0 -7 0.29 0.46
 7 0 6 5.5 0.74
 7 0 6 3.5 0.71
 7 0 6 4.16 0.76
 7 0 6 4.4 0.62
 7 0 6 5.32 0.68
 -7 0 -6 4.93 0.49
 -7 0 -6 5.32 0.84
 -7 0 -6 5.57 0.77
 -7 0 -6 5.81 0.75
 -7 0 -6 5.06 0.74
 -7 0 -6 2.64 0.75
 7 0 5 0.68 0.55
 7 0 5 0.47 0.38
 7 0 5 -0.05 0.44
 7 0 5 0.28 0.47
 7 0 5 0.31 0.5
 7 0 5 0.59 0.46
 -7 0 -5 -0.34 0.52
 -7 0 -5 0.2 0.36
 -7 0 -5 0.02 0.41
 -7 0 -5 -0.99 0.56
 -7 0 -5 0.24 0.47
 7 0 4 44.67 1.34
 7 0 4 45.95 1.4
 7 0 4 43.88 1.17
 7 0 4 42.97 1.2
 7 0 4 46.77 1.37
 7 0 4 43.61 1.33
 -7 0 -4 42.71 1.75
 -7 0 -4 45.28 1.42
 -7 0 -4 44.53 1.33
 -7 0 -4 37.35 1.28
 -7 0 -4 42.84 1.33
 -7 0 -4 42.92 1.06
 7 0 3 -0.24 0.35
 7 0 3 -0.43 0.34
 7 0 3 0.33 0.41
 7 0 3 -0.03 0.27
 7 0 3 0.33 0.39
 7 0 3 0.06 0.35
 -7 0 -3 0.03 0.3
 -7 0 -3 -0.05 0.34
 -7 0 -3 -0.16 0.37
 -7 0 -3 -0.25 0.45
 -7 0 -3 -0.43 0.34
 -7 0 -3 -0.39 0.36
 7 0 2 1.83 0.41
 7 0 2 1.63 0.41
 7 0 2 1.43 0.4
 7 0 2 1.27 0.37
 7 0 2 1.6 0.27
 7 0 2 1.79 0.38
 -7 0 -2 1.63 0.39
 -7 0 -2 1.74 0.4
 -7 0 -2 1.25 0.44
 -7 0 -2 1.34 0.41
 -7 0 -2 1.67 0.39
 7 0 1 0.4 0.32
 7 0 1 -0.47 0.29
 7 0 1 0.38 0.31
 7 0 1 0.04 0.34
 -7 0 -1 0.4 0.35
 -7 0 -1 0.35 0.35
 -7 0 -1 0.3 0.34
 -7 0 -1 0 0.35
 -7 0 -1 0.33 0.34
 7 0 0 75.38 1.62
 7 0 0 76.9 1.59
 7 0 0 75.92 1.61
 7 0 0 75.65 1.4
 7 0 0 74.54 1.63
 -7 0 0 76.14 1.54
 -7 0 0 77.78 1.64
 -7 0 0 74.78 1.6
 -7 0 0 77.98 1.62
 -7 0 0 77.98 1.79
 -7 0 0 78.68 1.67
 7 0 -1 -0.3 0.25
 7 0 -1 0.15 0.31
 7 0 -1 0.27 0.37
 7 0 -1 -0.23 0.31
 7 0 -1 -0.8 0.28
 -7 0 1 -0.2 0.18
 -7 0 1 0.17 0.3
 -7 0 1 0.48 0.32
 -7 0 1 0.05 0.32
 -7 0 1 0.12 0.34
 -7 0 1 -0.42 0.28
 7 0 -2 41.28 1.06
 7 0 -2 43.19 1.1
 7 0 -2 40.42 0.82
 7 0 -2 41.76 1.06
 -7 0 2 40.61 1.06
 -7 0 2 42.73 1.08
 -7 0 2 41.99 1.06
 -7 0 2 40.77 1.1
 -7 0 2 40.14 0.83
 7 0 -3 0.1 0.32
 7 0 -3 0.25 0.34
 7 0 -3 -0.24 0.34
 7 0 -3 -0.08 0.34
 -7 0 3 0.29 0.33
 -7 0 3 0.18 0.32
 -7 0 3 0.33 0.32
 7 0 -4 18.8 0.82
 7 0 -4 18.12 0.68
 7 0 -4 18.22 0.67
 7 0 -4 18.95 0.87
 7 0 -4 18.77 0.82
 7 0 -4 19.02 0.91
 -7 0 4 18.57 0.83
 -7 0 4 19.17 0.81
 -7 0 4 18.29 0.89
 -7 0 4 19.06 0.8
 7 0 -5 -0.75 0.41
 7 0 -5 0.05 0.43
 7 0 -5 0.07 0.35
 7 0 -5 -0.08 0.41
 -7 0 5 0.25 0.41
 -7 0 5 -0.04 0.42
 -7 0 5 -0.46 0.41
 7 0 -6 8.63 0.98
 7 0 -6 9.23 0.93
 7 0 -6 9.79 0.93
 7 0 -6 9.67 0.88
 -7 0 6 9.8 0.93
 -7 0 6 9.7 1.06
 -7 0 6 8.33 0.91
 -7 0 6 10.09 0.91
 7 0 -7 -0.93 0.62
 7 0 -7 0.38 0.58
 7 0 -7 -0.6 0.63
 7 0 -7 -0.56 0.62
 -7 0 7 0.11 0.55
 -7 0 7 -0.15 0.25
 -7 0 7 -0.63 0.69
 -7 0 7 0.06 0.67
 7 0 -8 0.29 0.91
 7 0 -8 0.67 0.78
 7 0 -8 1.09 0.84
 7 0 -8 -0.13 0.87
 7 0 -8 0.4 0.65
 7 0 -8 1.04 0.9
 -7 0 8 1.67 0.97
 -7 0 8 1.31 0.36
 -7 0 8 1.28 0.91
 -7 0 8 -0.37 0.68
 8 0 7 -0.72 0.86
 8 0 7 1.72 0.81
 8 0 7 -0.49 0.63
 8 0 7 -0.26 0.96
 -8 0 -7 -1.58 0.92
 -8 0 -7 -0.33 0.84
 8 0 6 34.83 1.48
 8 0 6 36.85 1.45
 8 0 6 30.12 1.44
 8 0 6 30.9 1.34
 8 0 6 31.72 1.56
 -8 0 -6 27.87 1.79
 -8 0 -6 34.95 1.56
 -8 0 -6 29.88 0.94
 -8 0 -6 34.74 1.5
 -8 0 -6 31.18 1.37
 8 0 5 0.21 0.47
 8 0 5 -0.08 0.59
 8 0 5 -0.06 0.49
 8 0 5 1.03 0.49
 8 0 5 -0.13 0.5
 8 0 5 0.67 0.47
 -8 0 -5 -0.85 0.56
 -8 0 -5 -0.03 0.62
 -8 0 -5 -0.12 0.38
 -8 0 -5 -0.19 0.47
 -8 0 -5 0.26 0.45
 8 0 4 6.32 0.69
 8 0 4 6.72 0.82
 8 0 4 6.63 0.72
 8 0 4 6.71 0.8
 8 0 4 6.68 0.7
 8 0 4 5.83 0.64
 -8 0 -4 8.06 0.87
 -8 0 -4 4.59 0.59
 -8 0 -4 6.12 0.67
 -8 0 -4 4.94 0.74
 -8 0 -4 7.31 0.73
 -8 0 -4 6.6 0.71
 8 0 3 0.02 0.39
 8 0 3 -0.22 0.41
 8 0 3 0.32 0.42
 8 0 3 0.83 0.41
 8 0 3 0.2 0.31
 8 0 3 -0.54 0.38
 -8 0 -3 0.22 0.16
 -8 0 -3 -0.27 0.37
 -8 0 -3 0.29 0.42
 -8 0 -3 0.38 0.4
 -8 0 -3 -0.42 0.48
 -8 0 -3 0.12 0.39
 8 0 2 12.91 0.75
 8 0 2 13.02 0.78
 8 0 2 12.35 0.73
 8 0 2 12.84 0.8
 8 0 2 12.95 0.57
 -8 0 -2 13.29 0.79
 -8 0 -2 13.38 0.8
 -8 0 -2 13.49 0.79
 -8 0 -2 14.57 0.82
 -8 0 -2 11.9 0.94
 8 0 1 0.1 0.35
 8 0 1 0.1 0.34
 8 0 1 0.19 0.34
 8 0 1 -0.03 0.34
 -8 0 -1 -0.11 0.35
 -8 0 -1 0.44 0.36
 -8 0 -1 -0.42 0.33
 -8 0 -1 0.44 0.34
 -8 0 -1 0.04 0.33
 -8 0 -1 0.12 0.33
 8 0 0 15.46 0.73
 8 0 0 15.66 0.74
 8 0 0 15.36 0.48
 8 0 0 16.44 0.77
 8 0 0 17.02 0.76
 -8 0 0 15.53 0.7
 -8 0 0 15.68 0.74
 -8 0 0 15.88 0.77
 -8 0 0 16.13 0.79
 -8 0 0 15.25 0.78
 -8 0 0 16 0.75
 8 0 -1 -0.22 0.32
 8 0 -1 0.03 0.26
 8 0 -1 -0.02 0.35
 8 0 -1 0.07 0.33
 8 0 -1 -0.04 0.35
 -8 0 1 0.19 0.32
 -8 0 1 -0.1 0.32
 -8 0 1 -0.13 0.37
 -8 0 1 -0.32 0.21
 -8 0 1 0.23 0.34
 -8 0 1 -0.28 0.3
 8 0 -2 5.33 0.59
 8 0 -2 6.27 0.42
 8 0 -2 6.08 0.58
 8 0 -2 6.36 0.58
 -8 0 2 6.48 0.57
 -8 0 2 6.16 0.29
 -8 0 2 6.12 0.55
 -8 0 2 6.74 0.6
 -8 0 2 6.27 0.58
 8 0 -3 0.04 0.34
 8 0 -3 0.12 0.35
 8 0 -3 0.2 0.34
 -8 0 3 0.06 0.34
 -8 0 3 0.05 0.33
 -8 0 3 0.2 0.35
 8 0 -4 73.03 1.67
 8 0 -4 72.33 1.74
 8 0 -4 69.53 1.46
 8 0 -4 70.65 1.47
 8 0 -4 71.72 1.55
 8 0 -4 73.74 1.77
 8 0 -4 73.87 1.69
 -8 0 4 70.14 1.59
 -8 0 4 72.67 1.68
 -8 0 4 72.53 1.69
 8 0 -5 -0.1 0.29
 8 0 -5 0.27 0.47
 8 0 -5 0.29 0.46
 8 0 -5 -0.42 0.32
 8 0 -5 -0.14 0.44
 8 0 -5 -0.47 0.46
 -8 0 5 -0.25 0.44
 -8 0 5 0.18 0.47
 -8 0 5 -0.29 0.46
 8 0 -6 0.74 0.6
 8 0 -6 0.72 0.47
 8 0 -6 0.69 0.51
 8 0 -6 1.84 0.56
 8 0 -6 1.21 0.58
 -8 0 6 0.66 0.52
 -8 0 6 0.92 0.58
 -8 0 6 0.33 0.56
 8 0 -7 -0.5 0.62
 8 0 -7 -0.59 0.57
 8 0 -7 0.93 0.73
 8 0 -7 0.25 0.73
 8 0 -7 0.12 0.66
 -8 0 7 -0.32 0.51
 -8 0 7 0.07 0.65
 -8 0 7 0.68 0.77
 8 0 -8 4.47 0.87
 8 0 -8 3.9 1.04
 8 0 -8 3.72 0.98
 8 0 -8 3.55 0.82
 8 0 -8 3.91 0.97
 8 0 -8 3.94 1.01
 8 0 -8 5.41 1.07
 -8 0 8 6.7 1.13
 -8 0 8 4.51 0.82
 -8 0 8 6.29 1.19
 9 0 7 -0.72 0.93
 9 0 7 0.12 1.11
 -9 0 -7 -1.19 1.09
 -9 0 -7 0.94 0.96
 9 0 6 2.87 0.68
 9 0 6 1.02 0.74
 9 0 6 2.42 0.95
 9 0 6 1.75 0.73
 9 0 6 1.04 0.65
 -9 0 -6 2.52 0.68
 -9 0 -6 3.15 0.73
 -9 0 -6 1.07 0.82
 -9 0 -6 2.03 0.84
 9 0 5 0.52 0.48
 9 0 5 -0.45 0.51
 9 0 5 0.42 0.53
 9 0 5 0.46 0.55
 9 0 5 0.08 0.66
 9 0 5 0.69 0.55
 -9 0 -5 -0.11 0.49
 -9 0 -5 -0.36 0.71
 -9 0 -5 0.48 0.58
 -9 0 -5 -1.2 0.69
 9 0 4 0.04 0.53
 9 0 4 0.12 0.42
 9 0 4 0.03 0.47
 9 0 4 0.64 0.48
 9 0 4 -0.25 0.49
 9 0 4 0.53 0.5
 -9 0 -4 0.36 0.48
 -9 0 -4 0.42 0.49
 -9 0 -4 1.32 0.47
 -9 0 -4 0.49 0.54
 -9 0 -4 -0.8 0.57
 9 0 3 0.07 0.33
 9 0 3 0.85 0.43
 9 0 3 -0.21 0.44
 9 0 3 -0.33 0.45
 9 0 3 -0.12 0.4
 -9 0 -3 -0.81 0.48
 -9 0 -3 -0.58 0.4
 -9 0 -3 -0.22 0.4
 -9 0 -3 -0.46 0.45
 -9 0 -3 -0.11 0.18
 -9 0 -3 -0.29 0.42
 9 0 2 16.71 0.66
 9 0 2 16.77 0.87
 9 0 2 17.73 0.89
 9 0 2 18.05 0.92
 9 0 2 16 0.88
 -9 0 -2 16.56 0.92
 -9 0 -2 16.73 0.92
 -9 0 -2 16.61 1.1
 -9 0 -2 17.05 0.93
 -9 0 -2 15.86 0.83
 9 0 1 -0.43 0.35
 9 0 1 0.34 0.39
 9 0 1 0.47 0.41
 9 0 1 -0.17 0.35
 -9 0 -1 -0.02 0.39
 -9 0 -1 0.08 0.37
 -9 0 -1 0.01 0.41
 -9 0 -1 -0.18 0.42
 -9 0 -1 -0.11 0.37
 -9 0 -1 0.02 0.38
 9 0 0 32.12 1.03
 9 0 0 30.69 1.04
 9 0 0 30.22 1.03
 9 0 0 29.86 0.71
 9 0 0 30.5 1.02
 -9 0 0 30.39 1.07
 -9 0 0 30.6 1.08
 -9 0 0 30.42 1.04
 -9 0 0 30.78 1.01
 -9 0 0 29.58 0.97
 -9 0 0 31.45 1.09
 9 0 -1 -0.12 0.4
 9 0 -1 -0.23 0.34
 9 0 -1 -0.16 0.3
 9 0 -1 0.37 0.35
 -9 0 1 -0.04 0.33
 -9 0 1 -0.51 0.34
 -9 0 1 -0.08 0.33
 -9 0 1 0.21 0.41
 -9 0 1 0.55 0.39
 -9 0 1 0.01 0.24
 9 0 -2 80.87 1.73
 9 0 -2 81.85 1.83
 9 0 -2 82.35 1.92
 9 0 -2 81.72 1.5
 9 0 -2 83.88 1.8
 9 0 -2 80.64 1.78
 -9 0 2 81.3 1.79
 -9 0 2 81.32 1.77
 -9 0 2 82.07 1.85
 -9 0 2 82.69 1.81
 9 0 -3 -0.01 0.37
 9 0 -3 0.01 0.2
 9 0 -3 0.32 0.39
 9 0 -3 0.26 0.39
 -9 0 3 -0.04 0.23
 -9 0 3 -0.13 0.38
 -9 0 3 -0.15 0.35
 -9 0 3 -0.02 0.36
 -9 0 3 -0.02 0.39
 9 0 -4 0.48 0.46
 9 0 -4 0.7 0.48
 9 0 -4 0.91 0.41
 9 0 -4 0.09 0.46
 -9 0 4 1.33 0.48
 -9 0 4 1.74 0.48
 -9 0 4 1.39 0.46
 9 0 -5 -0.16 0.48
 9 0 -5 0.49 0.54
 9 0 -5 0.2 0.37
 9 0 -5 -0.08 0.5
 9 0 -5 0.01 0.52
 9 0 -5 -0.02 0.2
 9 0 -5 0.26 0.23
 -9 0 5 0.14 0.52
 -9 0 5 -0.03 0.5
 -9 0 5 0.67 0.49
 9 0 -6 9.92 0.89
 9 0 -6 12.6 1.13
 9 0 -6 11.63 0.86
 9 0 -6 11.86 1.17
 9 0 -6 13.72 1.1
 -9 0 6 10.84 1.08
 -9 0 6 12.4 1.08
 -9 0 6 11.79 1.07
 9 0 -7 -1.54 0.65
 9 0 -7 -0.59 0.71
 9 0 -7 0.21 0.61
 9 0 -7 0.75 0.82
 9 0 -7 -0.38 0.62
 -9 0 7 1.21 0.77
 -9 0 7 -0.57 0.72
 -9 0 7 -0.39 0.88
 -9 0 7 -0.76 0.72
 9 0 -8 5.53 1.13
 9 0 -8 2.96 0.92
 9 0 -8 3.84 1.11
 9 0 -8 4.59 1.12
 9 0 -8 6.11 1.16
 -9 0 8 5.21 1.13
 -9 0 8 3.94 1.23
 10 0 6 2.31 0.71
 10 0 6 1.79 0.82
 10 0 6 0.51 0.7
 10 0 6 1.45 0.78
 10 0 6 0.96 0.95
 -10 0 -6 4.3 0.76
 -10 0 -6 2.48 0.69
 -10 0 -6 1.14 0.97
 10 0 5 -0.15 0.59
 10 0 5 0.1 0.58
 10 0 5 0.36 0.59
 10 0 5 -0.11 0.63
 10 0 5 -0.64 0.71
 10 0 5 0.07 0.59
 -10 0 -5 0.23 0.65
 -10 0 -5 0.21 0.82
 -10 0 -5 0.51 0.53
 -10 0 -5 -1.67 0.75
 -10 0 -5 -0.43 0.61
 10 0 4 3.14 0.62
 10 0 4 4.08 0.69
 10 0 4 4.1 0.62
 10 0 4 3.86 0.67
 10 0 4 3.09 0.51
 -10 0 -4 3.61 0.71
 -10 0 -4 4.6 0.7
 -10 0 -4 3.14 0.73
 -10 0 -4 1.45 0.81
 -10 0 -4 3.24 0.62
 10 0 3 0.03 0.45
 10 0 3 0.57 0.43
 10 0 3 0.01 0.46
 10 0 3 -0.61 0.52
 10 0 3 0.04 0.35
 -10 0 -3 0.6 0.49
 -10 0 -3 -0.36 0.52
 -10 0 -3 -1.15 0.57
 -10 0 -3 -0.7 0.41
 -10 0 -3 -0.09 0.2
 -10 0 -3 -0.45 0.47
 10 0 2 19.62 0.98
 10 0 2 19.38 1.04
 10 0 2 19.34 0.73
 10 0 2 20.23 1.05
 10 0 2 20.72 1.01
 -10 0 -2 20.35 1.03
 -10 0 -2 19.81 1.25
 -10 0 -2 19.83 1.06
 -10 0 -2 18.71 0.95
 -10 0 -2 20.54 1.02
 -10 0 -2 21.37 1.05
 10 0 1 0.31 0.41
 10 0 1 0.29 0.44
 10 0 1 0.5 0.41
 10 0 1 -0.29 0.36
 -10 0 -1 -0.2 0.44
 -10 0 -1 0.46 0.49
 -10 0 -1 -0.49 0.37
 -10 0 -1 -0.25 0.43
 -10 0 -1 -0.74 0.38
 -10 0 -1 -0.79 0.37
 10 0 0 27.02 0.67
 10 0 0 28.92 1.09
 10 0 0 28.53 1.08
 10 0 0 27.31 1.06
 10 0 0 28.59 1.07
 -10 0 0 28.81 1.01
 -10 0 0 28.38 1.11
 -10 0 0 27.71 1.06
 -10 0 0 30.74 1.14
 -10 0 0 29.69 1.11
 -10 0 0 29.56 1.09
 10 0 -1 -0.32 0.32
 10 0 -1 0.56 0.45
 10 0 -1 0.93 0.43
 10 0 -1 0.22 0.45
 -10 0 1 -0.14 0.43
 -10 0 1 0.75 0.42
 -10 0 1 -0.01 0.27
 -10 0 1 0.54 0.42
 -10 0 1 0.31 0.41
 -10 0 1 0.31 0.43
 10 0 -2 42.9 1.33
 10 0 -2 43.36 1.23
 10 0 -2 43.78 1.33
 10 0 -2 44.48 1.41
 10 0 -2 43.37 1.3
 10 0 -2 42.67 1.03
 -10 0 2 43.53 1.37
 -10 0 2 41.7 1.28
 -10 0 2 42.65 1.29
 -10 0 2 44.73 1.31
 10 0 -3 0.12 0.45
 10 0 -3 0.23 0.45
 10 0 -3 -0.11 0.26
 10 0 -3 -0.01 0.44
 10 0 -3 0.89 0.52
 -10 0 3 0.67 0.46
 -10 0 3 0.25 0.46
 -10 0 3 0.15 0.43
 -10 0 3 -0.21 0.22
 -10 0 3 0.41 0.45
 10 0 -4 0.64 0.52
 10 0 -4 1.3 0.54
 10 0 -4 -0.11 0.47
 10 0 -4 0.32 0.47
 -10 0 4 0.61 0.49
 -10 0 4 0.21 0.48
 -10 0 4 0.1 0.49
 -10 0 4 0.11 0.51
 10 0 -5 -0.11 0.45
 10 0 -5 0.09 0.58
 10 0 -5 0.32 0.59
 10 0 -5 -0.08 0.61
 10 0 -5 -0.7 0.53
 -10 0 5 -0.51 0.54
 -10 0 5 -0.44 0.57
 -10 0 5 0.47 0.55
 10 0 -6 29.09 1.49
 10 0 -6 27.34 1.31
 10 0 -6 27.07 1.49
 10 0 -6 26.19 0.9
 10 0 -6 27.02 1.38
 -10 0 6 28.19 1.39
 -10 0 6 28.31 1.36
 -10 0 6 27.88 1.39
 10 0 -7 -0.45 0.83
 10 0 -7 0.07 0.51
 10 0 -7 -0.42 0.81
 10 0 -7 0.25 0.9
 -10 0 7 -0.51 0.82
 -10 0 7 0.36 0.86
 -10 0 7 -0.77 0.84
 -10 0 7 0.54 0.87
 10 0 -8 0.1 1.18
 10 0 -8 2.33 1.13
 10 0 -8 2.19 1.16
 -10 0 8 1.59 1.16
 -10 0 8 1.05 1.08
 -10 0 8 2.74 1.27
 11 0 6 0.25 1.14
 11 0 6 -0.43 0.81
 -11 0 -6 0.71 1.15
 11 0 5 0.24 0.76
 11 0 5 1.56 0.7
 11 0 5 -0.82 0.71
 11 0 5 0.15 0.61
 11 0 5 -0.37 0.65
 -11 0 -5 -0.08 0.85
 -11 0 -5 0.9 0.65
 -11 0 -5 -1.97 0.96
 -11 0 -5 -1.13 0.65
 -11 0 -5 0.45 0.8
 11 0 4 2.36 0.73
 11 0 4 1.89 0.74
 11 0 4 2.03 0.53
 11 0 4 1.97 0.64
 11 0 4 2.95 0.69
 -11 0 -4 1.67 0.62
 -11 0 -4 2.16 0.79
 -11 0 -4 1.65 0.55
 -11 0 -4 0.55 0.85
 -11 0 -4 2.39 0.71
 11 0 3 -0.39 0.37
 11 0 3 -0.18 0.61
 11 0 3 -0.33 0.5
 11 0 3 -0.07 0.49
 11 0 3 0.72 0.58
 -11 0 -3 0.12 0.61
 -11 0 -3 0.06 0.68
 -11 0 -3 -0.01 0.24
 -11 0 -3 -0.86 0.51
 -11 0 -3 -0.38 0.5
 -11 0 -3 -0.73 0.47
 11 0 2 0.4 0.55
 11 0 2 0.93 0.33
 11 0 2 0.51 0.5
 11 0 2 0.73 0.49
 11 0 2 0.91 0.54
 -11 0 -2 1 0.49
 -11 0 -2 -0.72 0.5
 -11 0 -2 0.2 0.54
 -11 0 -2 1.02 0.52
 -11 0 -2 0.13 0.53
 -11 0 -2 1 0.65
 11 0 1 0.25 0.45
 11 0 1 -0.35 0.46
 11 0 1 -0.26 0.5
 11 0 1 -0.42 0.47
 -11 0 -1 -0.31 0.49
 -11 0 -1 -0.43 0.49
 -11 0 -1 0.23 0.49
 -11 0 -1 -0.11 0.52
 -11 0 -1 -0.27 0.43
 -11 0 -1 -0.09 0.44
 11 0 0 13.38 0.94
 11 0 0 14.55 0.73
 11 0 0 13.46 0.85
 11 0 0 14.49 0.94
 11 0 0 13.13 0.89
 -11 0 0 12.63 0.85
 -11 0 0 13.23 0.91
 -11 0 0 14.53 0.87
 -11 0 0 13.65 0.93
 -11 0 0 14.53 0.95
 -11 0 0 11.77 0.92
 11 0 -1 -0.36 0.52
 11 0 -1 -0.02 0.39
 11 0 -1 -0.28 0.49
 11 0 -1 0.21 0.44
 -11 0 1 -0.96 0.45
 -11 0 1 -0.14 0.31
 -11 0 1 -0.24 0.47
 -11 0 1 -0.52 0.4
 -11 0 1 -0.2 0.5
 -11 0 1 -0.46 0.43
 -11 0 1 0.01 0.45
 11 0 -2 57.17 1.47
 11 0 -2 57.24 1.59
 11 0 -2 56.66 1.29
 11 0 -2 56.07 1.56
 11 0 -2 57.72 1.69
 11 0 -2 55.31 1.63
 -11 0 2 55.42 1.6
 -11 0 2 55.09 1.57
 -11 0 2 56.07 1.56
 -11 0 2 55.18 1.58
 11 0 -3 0.46 0.55
 11 0 -3 0.48 0.51
 11 0 -3 0.44 0.49
 11 0 -3 -0.03 0.3
 11 0 -3 0.55 0.5
 -11 0 3 0.45 0.44
 -11 0 3 1.07 0.5
 -11 0 3 0.38 0.53
 -11 0 3 -0.05 0.49
 11 0 -4 27.76 1.25
 11 0 -4 27.05 1.27
 11 0 -4 28.41 1.29
 11 0 -4 26.4 1.21
 11 0 -4 27.78 1.28
 -11 0 4 24.78 1.17
 -11 0 4 27.45 1.21
 -11 0 4 26.97 1.25
 -11 0 4 27.26 1.22
 -11 0 4 26.73 1.26
 -11 0 4 26.49 0.81
 11 0 -5 -0.21 0.63
 11 0 -5 -0.17 0.65
 11 0 -5 0.27 0.55
 11 0 -5 -0.81 0.62
 -11 0 5 0.95 0.66
 -11 0 5 -0.77 0.61
 -11 0 5 0.25 0.61
 11 0 -6 6.94 0.83
 11 0 -6 8.17 0.96
 11 0 -6 5.07 0.94
 11 0 -6 9.37 0.96
 11 0 -6 5.85 0.96
 -11 0 6 6.34 0.93
 -11 0 6 6.4 0.89
 -11 0 6 6.94 0.91
 11 0 -7 -1.4 0.74
 11 0 -7 0.96 1.01
 11 0 -7 0.29 0.98
 11 0 -7 1.59 0.99
 11 0 -7 0.78 1.01
 -11 0 7 -1.12 0.89
 -11 0 7 -0.21 0.88
 -11 0 7 -0.09 0.91
 12 0 5 1.23 0.98
 12 0 5 0.37 0.9
 12 0 5 1.72 0.76
 12 0 5 -0.63 0.67
 -12 0 -5 -0.75 1.22
 -12 0 -5 0.98 1.05
 -12 0 -5 -1.48 0.78
 -12 0 -5 -0.69 0.89
 12 0 4 9.58 0.94
 12 0 4 10.99 1.17
 12 0 4 10.3 1.2
 12 0 4 9.18 0.98
 12 0 4 9.92 1.16
 -12 0 -4 7.74 0.91
 -12 0 -4 6.06 1.12
 -12 0 -4 9 1.01
 -12 0 -4 8.58 1.08
 -12 0 -4 8.9 1.07
 12 0 3 0.47 0.66
 12 0 3 -1.38 0.58
 12 0 3 0.18 0.41
 12 0 3 0.32 0.74
 12 0 3 0.05 0.61
 -12 0 -3 0.01 0.68
 -12 0 -3 -0.01 0.6
 -12 0 -3 -0.22 0.71
 -12 0 -3 -0.19 0.62
 -12 0 -3 0.34 0.6
 -12 0 -3 -0.01 0.28
 -12 0 -3 -0.21 0.82
 12 0 2 3.09 0.66
 12 0 2 3.46 0.64
 12 0 2 3.38 0.71
 12 0 2 2.22 0.73
 12 0 2 3.3 0.43
 -12 0 -2 2.81 0.69
 -12 0 -2 2.73 0.65
 -12 0 -2 3.37 0.72
 -12 0 -2 2.98 0.69
 -12 0 -2 2.06 0.79
 -12 0 -2 3.44 0.81
 12 0 1 0.18 0.49
 12 0 1 0.13 0.58
 12 0 1 -0.33 0.57
 12 0 1 -0.22 0.54
 12 0 1 0.32 0.35
 12 0 1 0.03 0.59
 -12 0 -1 0.19 0.55
 -12 0 -1 0.49 0.59
 -12 0 -1 -1.03 0.47
 -12 0 -1 -0.04 0.54
 -12 0 -1 -0.68 0.53
 -12 0 -1 0.77 0.59
 12 0 0 67.55 1.83
 12 0 0 62.4 1.83
 12 0 0 69.45 1.51
 12 0 0 67.1 1.88
 -12 0 0 68.27 1.87
 -12 0 0 69.06 1.85
 -12 0 0 69.39 1.87
 -12 0 0 69.18 1.77
 -12 0 0 68.9 1.94
 -12 0 0 67.48 1.85
 12 0 -1 -0.43 0.54
 12 0 -1 -0.2 0.56
 12 0 -1 -0.17 0.55
 12 0 -1 0.03 0.42
 -12 0 1 0.18 0.53
 -12 0 1 -0.13 0.5
 -12 0 1 -0.26 0.52
 -12 0 1 -0.1 0.35
 -12 0 1 0.34 0.59
 -12 0 1 -0.64 0.49
 -12 0 1 0.48 0.49
 12 0 -2 21.08 1.13
 12 0 -2 20.92 1.19
 12 0 -2 21.34 1.21
 12 0 -2 20.81 1.03
 12 0 -2 20.83 0.89
 -12 0 2 19.14 1.12
 -12 0 2 21.35 1.14
 -12 0 2 22.54 1.16
 -12 0 2 19.36 1.14
 12 0 -3 -0.04 0.55
 12 0 -3 -0.05 0.34
 12 0 -3 0.07 0.58
 12 0 -3 0.34 0.63
 12 0 -3 -1.11 0.52
 -12 0 3 -0.3 0.55
 -12 0 3 0.23 0.58
 -12 0 3 0.18 0.59
 -12 0 3 0.91 0.58
 12 0 -4 0.25 0.64
 12 0 -4 0.01 0.68
 12 0 -4 0 0.6
 12 0 -4 0.53 0.66
 12 0 -4 0.01 0.65
 -12 0 4 0.03 0.62
 -12 0 4 0.69 0.66
 -12 0 4 -0.48 0.62
 -12 0 4 0.57 0.54
 -12 0 4 -0.35 0.65
 12 0 -5 0.74 0.79
 12 0 -5 0.06 0.68
 12 0 -5 -0.27 0.72
 12 0 -5 0.31 0.74
 12 0 -5 -0.3 0.65
 -12 0 5 0.28 0.71
 -12 0 5 -0.44 0.63
 -12 0 5 -0.19 0.74
 -12 0 5 -0.17 0.44
 -12 0 5 -0.15 0.69
 12 0 -6 -0.37 0.93
 12 0 -6 -0.92 0.59
 12 0 -6 0.5 0.84
 12 0 -6 -0.1 0.8
 12 0 -6 1.35 0.77
 -12 0 6 -0.01 0.87
 -12 0 6 -0.8 0.84
 -12 0 6 0.6 0.86
 12 0 -7 -0.27 1.12
 12 0 -7 -0.69 1.16
 12 0 -7 -0.31 1.14
 -12 0 7 -1.48 1.01
 -12 0 7 -1.05 1.02
 -12 0 7 0.31 1.08
 13 0 4 1.2 0.58
 13 0 4 1.4 0.82
 13 0 4 0.32 0.85
 13 0 4 3.9 0.96
 13 0 4 3.26 0.99
 -13 0 -4 0.15 0.85
 -13 0 -4 2.28 1.1
 -13 0 -4 -0.23 0.87
 -13 0 -4 3.71 0.89
 -13 0 -4 -0.66 1.17
 -13 0 -4 2.06 0.98
 13 0 3 0.28 0.44
 13 0 3 0.88 0.71
 13 0 3 -1.43 0.7
 13 0 3 0.18 0.73
 13 0 3 0.26 0.86
 -13 0 -3 0.81 0.84
 -13 0 -3 -0.97 0.66
 -13 0 -3 0.23 0.81
 -13 0 -3 -0.34 0.29
 -13 0 -3 0.24 0.76
 -13 0 -3 -0.51 0.97
 -13 0 -3 0.34 0.7
 13 0 2 21.87 1.37
 13 0 2 24.68 1.43
 13 0 2 21.84 1.45
 13 0 2 21.72 0.88
 13 0 2 24.17 1.34
 -13 0 -2 21.48 1.44
 -13 0 -2 21.68 1.27
 -13 0 -2 24.08 1.4
 -13 0 -2 24.33 1.77
 -13 0 -2 21.78 1.34
 -13 0 -2 22.19 1.35
 13 0 1 -1.08 0.65
 13 0 1 -0.48 0.63
 13 0 1 -0.08 0.65
 13 0 1 -0.32 0.35
 13 0 1 1.67 0.6
 13 0 1 0.53 0.64
 -13 0 -1 1.25 0.65
 -13 0 -1 -0.23 0.6
 -13 0 -1 0.51 0.65
 -13 0 -1 0.07 0.66
 -13 0 -1 0.34 0.67
 -13 0 -1 0.48 0.69
 13 0 0 0.48 0.63
 13 0 0 0.79 0.63
 13 0 0 0.08 0.44
 13 0 0 0.02 0.69
 -13 0 0 0.1 0.57
 -13 0 0 -0.33 0.61
 -13 0 0 0.36 0.58
 -13 0 0 0.38 0.57
 -13 0 0 0.77 0.56
 -13 0 0 -0.09 0.61
 13 0 -1 0.56 0.64
 13 0 -1 -0.24 0.55
 13 0 -1 0.67 0.63
 13 0 -1 -0.44 0.48
 -13 0 1 -0.21 0.52
 -13 0 1 0.38 0.65
 -13 0 1 -0.21 0.4
 -13 0 1 0.43 0.57
 -13 0 1 0.14 0.54
 -13 0 1 0.53 0.65
 -13 0 1 -0.75 0.57
 13 0 -2 10.17 0.86
 13 0 -2 10.78 1.06
 13 0 -2 9.48 1.18
 13 0 -2 12.3 1.04
 13 0 -2 10.72 1.14
 -13 0 2 10.21 1.06
 -13 0 2 9.94 1.06
 -13 0 2 10.5 1.1
 -13 0 2 12.39 1.13
 13 0 -3 0.39 0.72
 13 0 -3 1.12 0.65
 13 0 -3 0.05 0.68
 13 0 -3 -0.05 0.6
 13 0 -3 -0.31 0.42
 -13 0 3 0.47 0.66
 -13 0 3 0.37 0.66
 -13 0 3 0.45 0.6
 -13 0 3 -0.02 0.68
 13 0 -4 5.4 0.92
 13 0 -4 4.5 0.83
 13 0 -4 2.56 0.84
 13 0 -4 4.52 0.84
 13 0 -4 4.1 0.83
 -13 0 4 3.68 0.78
 -13 0 4 4.62 0.87
 -13 0 4 4.97 0.84
 -13 0 4 4.57 0.77
 13 0 -5 -1.07 0.8
 13 0 -5 0.09 0.77
 13 0 -5 -1.62 0.71
 13 0 -5 -0.91 0.79
 13 0 -5 0.18 0.84
 -13 0 5 0.24 0.39
 -13 0 5 -0.38 0.82
 -13 0 5 -0.41 0.8
 -13 0 5 -0.73 0.62
 -13 0 5 0.64 0.83
 13 0 -6 2.14 1
 13 0 -6 3.91 1.09
 13 0 -6 3.11 0.83
 13 0 -6 2.14 1.1
 13 0 -6 2.13 0.99
 -13 0 6 3.08 1.04
 -13 0 6 4.22 0.75
 -13 0 6 4.12 0.7
 -13 0 6 2.54 0.99
 -13 0 6 4.1 1.04
 14 0 4 10.45 1.31
 -14 0 -4 8.6 1.47
 14 0 3 -0.37 0.84
 14 0 3 0.1 0.9
 14 0 3 -0.02 0.48
 14 0 3 0.47 0.95
 14 0 3 0.35 0.91
 -14 0 -3 0.09 0.92
 -14 0 -3 0.24 1.03
 -14 0 -3 -1.53 0.82
 -14 0 -3 -0.6 0.91
 -14 0 -3 -0.19 1.16
 -14 0 -3 0.22 0.84
 14 0 2 10.81 1.27
 14 0 2 8.16 1.07
 14 0 2 9.08 0.95
 14 0 2 9.97 1.11
 14 0 2 8.81 0.95
 14 0 2 8.85 0.74
 -14 0 -2 9.73 1.07
 -14 0 -2 9.44 1.06
 -14 0 -2 7.54 0.97
 -14 0 -2 12.67 1.45
 -14 0 -2 10.7 1.15
 -14 0 -2 12 1.81
 14 0 1 -0.14 0.64
 14 0 1 -0.02 0.42
 14 0 1 -0.08 0.45
 14 0 1 1.23 0.8
 14 0 1 -0.04 0.33
 14 0 1 0.97 0.74
 14 0 1 0.42 0.77
 14 0 1 -0.69 0.77
 -14 0 -1 0.14 0.69
 -14 0 -1 1.2 0.79
 -14 0 -1 0.87 0.77
 -14 0 -1 1.35 0.64
 -14 0 -1 0.41 0.77
 -14 0 -1 0.47 0.7
 14 0 0 0.48 0.51
 14 0 0 0.71 0.74
 14 0 0 0.06 0.77
 14 0 0 1.16 0.66
 14 0 0 0.93 0.65
 -14 0 0 0.94 0.62
 -14 0 0 0.8 0.73
 -14 0 0 0.37 0.71
 -14 0 0 0.52 0.75
 -14 0 0 0.42 0.6
 -14 0 0 0.93 0.77
 14 0 -1 -0.05 0.53
 14 0 -1 -0.8 0.66
 14 0 -1 0.19 0.75
 14 0 -1 0.25 0.7
 -14 0 1 -0.66 0.69
 -14 0 1 0.2 0.43
 -14 0 1 -0.24 0.68
 -14 0 1 -0.21 0.7
 -14 0 1 0.08 0.6
 -14 0 1 0.19 0.65
 14 0 -2 26.69 1.41
 14 0 -2 28.73 1.34
 14 0 -2 26.13 1.48
 14 0 -2 26.58 1.6
 14 0 -2 26.96 1.15
 -14 0 2 26.61 1.51
 -14 0 2 26.14 1.51
 -14 0 2 26.35 1.3
 -14 0 2 27.8 1.38
 -14 0 2 28.22 1.43
 14 0 -3 0.52 0.73
 14 0 -3 0.71 0.74
 14 0 -3 0.74 0.73
 14 0 -3 -0.4 0.48
 -14 0 3 0.55 0.79
 -14 0 3 -0.02 0.78
 -14 0 3 -0.14 0.75
 -14 0 3 0.74 0.69
 14 0 -4 -0.24 0.89
 14 0 -4 0.52 0.86
 14 0 -4 -0.12 0.79
 14 0 -4 0.26 0.81
 14 0 -4 0.01 0.94
 -14 0 4 1 0.96
 -14 0 4 0.67 0.85
 -14 0 4 0.93 0.76
 -14 0 4 -0.84 0.78
 14 0 -5 0.41 0.93
 14 0 -5 -0.55 0.89
 14 0 -5 1.67 0.97
 14 0 -5 -1.37 0.99
 14 0 -5 0.5 0.81
 -14 0 5 -0.88 0.87
 -14 0 5 -0.22 0.96
 -14 0 5 1.38 0.77
 -14 0 5 0.88 0.92
 14 0 -6 8.2 1.26
 -14 0 6 9.1 1.42
 -14 0 6 7.56 1.39
 15 0 2 1.6 1
 15 0 2 -0.27 0.93
 15 0 2 1.62 0.63
 15 0 2 2.13 1
 15 0 2 1.54 1.03
 -15 0 -2 1.38 1
 -15 0 -2 0.3 1.11
 -15 0 -2 0.24 1.01
 -15 0 -2 3.91 1.16
 -15 0 -2 -0.82 0.82
 -15 0 -2 1.11 0.96
 15 0 1 0.55 0.97
 15 0 1 -0.24 0.5
 15 0 1 -1.66 0.92
 15 0 1 0.65 0.89
 15 0 1 0.59 0.47
 15 0 1 -0.44 0.93
 -15 0 -1 0.16 0.92
 -15 0 -1 -0.02 0.89
 -15 0 -1 0.56 0.9
 -15 0 -1 0.3 0.89
 -15 0 -1 0.49 0.9
 -15 0 -1 0.29 0.82
 15 0 0 49.15 1.96
 15 0 0 47.72 1.42
 15 0 0 44.11 1.81
 15 0 0 45.38 1.86
 15 0 0 48.58 1.96
 -15 0 0 49.45 1.88
 -15 0 0 48.82 1.94
 -15 0 0 48.96 1.87
 -15 0 0 47.51 1.86
 -15 0 0 48.89 2
 -15 0 0 48.72 1.96
 15 0 -1 -0.84 0.69
 15 0 -1 -0.13 0.87
 15 0 -1 0 0.74
 15 0 -1 0.08 0.63
 15 0 -1 1.19 0.91
 -15 0 1 0.55 0.86
 -15 0 1 0.1 0.69
 -15 0 1 0.12 0.87
 -15 0 1 0.11 0.85
 -15 0 1 0.48 0.69
 15 0 -2 6.43 0.83
 15 0 -2 6.61 0.8
 15 0 -2 6.75 0.9
 15 0 -2 6.11 1
 15 0 -2 6.41 1.06
 -15 0 2 5.12 1.02
 -15 0 2 5.82 1.01
 -15 0 2 5 0.89
 -15 0 2 10.67 1.2
 -15 0 2 5.16 1.02
 15 0 -3 0.23 0.59
 15 0 -3 -0.39 0.8
 15 0 -3 -0.4 0.85
 15 0 -3 0.27 0.88
 -15 0 3 1.84 0.82
 -15 0 3 0.01 0.88
 -15 0 3 0.06 0.93
 -15 0 3 -0.08 0.93
 15 0 -4 14.63 1.69
 15 0 -4 18 1.74
 15 0 -4 13.57 1.62
 15 0 -4 13.68 1.37
 15 0 -4 15.25 1.43
 -15 0 4 14.54 1.67
 -15 0 4 14.47 1.65
 -15 0 4 16.09 1.67
 -15 0 4 15.42 1.51
 15 0 -5 -0.65 1.07
 15 0 -5 0.64 1.1
 15 0 -5 -0.01 1.23
 15 0 -5 -1.81 1.11
 -15 0 5 -1.9 1.03
 -15 0 5 -0.33 1.14
 -15 0 5 -1.57 1.05
 16 0 1 -0.56 1.11
 16 0 1 0.13 1.1
 16 0 1 1.62 1.15
 16 0 1 0.64 1.08
 -16 0 -1 -0.15 1.1
 -16 0 -1 0.36 1.11
 -16 0 -1 -1.34 1.05
 -16 0 -1 1.21 1.01
 -16 0 -1 0.52 1.16
 16 0 0 -0.51 1.05
 16 0 0 -1.74 0.93
 16 0 0 -0.17 1.11
 16 0 0 0.85 0.98
 -16 0 0 0.04 1.06
 -16 0 0 0.38 0.8
 -16 0 0 0.57 1
 -16 0 0 0.67 0.91
 -16 0 0 1.5 1.1
 -16 0 0 0.5 0.98
 -16 0 0 -0.74 0.94
 16 0 -1 0.07 1.08
 16 0 -1 0.12 0.92
 16 0 -1 0.59 1.07
 16 0 -1 -1.18 0.87
 16 0 -1 0.61 0.91
 16 0 -1 0.01 0.69
 -16 0 1 0.74 1.01
 -16 0 1 -0.26 0.87
 -16 0 1 0.69 1.01
 -16 0 1 0.65 0.9
 -16 0 1 0.25 0.95
 16 0 -2 9.36 1.25
 16 0 -2 7.87 0.96
 16 0 -2 5.38 0.91
 16 0 -2 7.04 1.13
 -16 0 2 7.57 1.12
 -16 0 2 7.61 1.18
 -16 0 2 6.66 1.14
 -16 0 2 7.69 1.28
 16 0 -3 -0.91 1.21
 16 0 -3 1.67 1.12
 16 0 -3 -0.71 0.93
 16 0 -3 -0.89 1.02
 -16 0 3 -0.72 0.99
 -16 0 3 -0.84 1.12
 -16 0 3 2.62 1.17
 -16 1 3 2 1.14
 -16 1 3 0.35 1.14
 -16 1 3 3.02 1.11
 16 -1 -3 0.16 1.1
 16 -1 -3 1.76 1
 16 -1 -3 0.28 1.05
 -16 1 2 3.78 1
 -16 1 2 4.27 1.16
 -16 1 2 2.96 1.13
 -16 1 2 3.34 0.97
 -16 1 2 4.57 1.13
 16 -1 -2 3.47 0.92
 16 -1 -2 4.6 0.86
 16 -1 -2 4.57 1.12
 16 -1 -2 4.68 1.12
 -16 1 1 10.83 1.22
 -16 1 1 13.22 1.35
 -16 1 1 12.93 1.35
 -16 1 1 11.76 1.35
 -16 1 1 11.34 1.23
 16 -1 -1 14.89 1.61
 16 -1 -1 14.13 1.63
 16 -1 -1 12.62 1.4
 16 -1 -1 14.06 1.78
 16 -1 -1 13.4 1.37
 -16 1 0 0.26 1.03
 -16 1 0 1.71 1.08
 -16 1 0 0.16 0.89
 -16 1 0 0.32 0.83
 -16 1 0 0 1.01
 -16 1 0 0.62 1.05
 16 -1 0 0.49 1.11
 16 -1 0 -0.37 0.69
 16 -1 0 0.25 0.99
 16 -1 0 -0.64 0.91
 16 -1 0 0.2 1.08
 -16 1 -1 1.83 1.04
 -16 1 -1 1.78 1.09
 -16 1 -1 2.61 1.11
 -16 1 -1 2.42 1.1
 -16 1 -1 1.24 1.16
 -16 1 -1 0.5 1.07
 16 -1 1 1.01 1.09
 16 -1 1 2.7 1.16
 16 -1 1 0.07 1.11
 16 -1 1 1.25 1
 -15 1 5 -0.21 1.05
 -15 1 5 1.23 1.12
 -15 1 5 0.92 1.18
 15 -1 -5 0.82 1.24
 15 -1 -5 -1.09 1.05
 15 -1 -5 1.04 1.1
 15 -1 -5 -0.25 1.12
 -15 1 4 4.29 1.11
 -15 1 4 3.38 0.92
 -15 1 4 3.37 1.07
 -15 1 4 3.25 1.14
 15 -1 -4 3.34 1.08
 15 -1 -4 2.88 1.16
 15 -1 -4 3.82 1.02
 15 -1 -4 2.4 0.95
 15 -1 -4 4.71 1.16
 -15 1 3 11.48 1.35
 -15 1 3 10.62 1.19
 -15 1 3 11.77 1.21
 -15 1 3 11.12 1.18
 15 -1 -3 9.55 0.94
 15 -1 -3 10.12 1.12
 15 -1 -3 10.45 1.05
 15 -1 -3 10.89 1.21
 -15 1 2 -0.23 0.87
 -15 1 2 1.23 0.74
 -15 1 2 0.38 0.77
 -15 1 2 -0.6 0.79
 -15 1 2 -0.95 0.85
 15 -1 -2 -0.46 0.78
 15 -1 -2 0.52 0.67
 15 -1 -2 0.03 0.94
 15 -1 -2 0.78 0.75
 -15 1 1 1.24 0.74
 -15 1 1 -0.11 0.74
 -15 1 1 0.08 0.86
 -15 1 1 -0.63 0.85
 -15 1 1 -0.4 0.83
 15 -1 -1 1.66 0.9
 15 -1 -1 0.26 0.88
 15 -1 -1 0.37 0.66
 15 -1 -1 2.18 0.95
 -15 1 0 -0.77 0.82
 -15 1 0 0.36 0.72
 -15 1 0 0.73 0.76
 -15 1 0 1.61 0.88
 -15 1 0 0.75 0.9
 -15 1 0 0.83 0.9
 15 -1 0 1.28 0.9
 15 -1 0 0.79 0.92
 15 -1 0 0.88 0.61
 15 -1 0 1.6 0.82
 15 -1 0 0.64 0.81
 -15 1 -1 1.55 0.89
 -15 1 -1 0.85 0.86
 -15 1 -1 2.99 0.92
 -15 1 -1 1.39 0.94
 -15 1 -1 1.51 0.95
 -15 1 -1 2.82 0.91
 15 -1 1 1.19 0.61
 15 -1 1 2.47 0.9
 15 -1 1 1.97 0.55
 15 -1 1 -0.3 0.86
 15 -1 1 1.77 0.94
 15 -1 1 2.05 0.96
 -15 1 -2 2.97 1.05
 -15 1 -2 2.08 0.95
 -15 1 -2 1.02 1.13
 -15 1 -2 1.83 1.03
 -15 1 -2 1.21 1
 -15 1 -2 2.85 1.18
 15 -1 2 1.71 1.11
 15 -1 2 1.49 0.53
 15 -1 2 2.4 1.03
 15 -1 2 3.53 0.96
 15 -1 2 2.26 0.98
 15 -1 2 2 0.62
 -14 1 6 0.82 1.19
 14 -1 -6 1.49 1.1
 -14 1 5 3.16 1.02
 -14 1 5 2.46 0.99
 -14 1 5 2.36 0.78
 -14 1 5 1.47 0.98
 14 -1 -5 2.15 0.93
 14 -1 -5 2.03 1.04
 14 -1 -5 2.67 0.91
 14 -1 -5 2.01 1.01
 14 -1 -5 2.21 1.05
 -14 1 4 0.15 0.71
 -14 1 4 0.38 0.88
 -14 1 4 0.11 0.84
 -14 1 4 -1.41 0.75
 14 -1 -4 0.03 0.85
 14 -1 -4 0.08 0.82
 14 -1 -4 -0.45 0.77
 14 -1 -4 -0.54 0.88
 14 -1 -4 -0.9 0.79
 -14 1 3 4.13 0.88
 -14 1 3 3.74 0.86
 -14 1 3 4.28 0.92
 -14 1 3 4.73 0.89
 14 -1 -3 4.26 0.56
 14 -1 -3 5.16 0.99
 14 -1 -3 5.08 0.92
 14 -1 -3 4.33 0.82
 14 -1 -3 4.52 0.91
 -14 1 2 2.61 0.71
 -14 1 2 2.43 0.82
 -14 1 2 2.93 0.84
 -14 1 2 2.2 0.77
 14 -1 -2 2.21 0.67
 14 -1 -2 2.99 0.77
 14 -1 -2 2.63 0.62
 14 -1 -2 2.22 0.8
 14 -1 -2 3.25 0.92
 -14 1 1 0.51 0.76
 -14 1 1 1.22 0.63
 -14 1 1 1.23 0.69
 -14 1 1 1.73 0.66
 -14 1 1 1.52 0.76
 -14 1 1 1.33 0.49
 14 -1 -1 1.56 0.79
 14 -1 -1 1.42 0.72
 14 -1 -1 0.66 0.59
 14 -1 -1 0.29 0.72
 -14 1 0 2.83 0.71
 -14 1 0 4.67 0.83
 -14 1 0 3.39 0.74
 -14 1 0 3.72 0.81
 -14 1 0 4.74 0.82
 -14 1 0 4.61 0.87
 14 -1 0 3.8 0.83
 14 -1 0 3.93 0.89
 14 -1 0 3.54 0.8
 14 -1 0 3.22 0.61
 -14 1 -1 24.88 1.51
 -14 1 -1 24.3 1.37
 -14 1 -1 23.8 1.45
 -14 1 -1 25.26 1.67
 -14 1 -1 23.97 1.46
 -14 1 -1 20.22 1.44
 14 -1 1 24.51 1.41
 14 -1 1 20.49 1.54
 14 -1 1 22.14 1.35
 14 -1 1 23.37 1.05
 14 -1 1 21.85 1.45
 14 -1 1 21.53 0.62
 14 -1 1 22.38 1.48
 -14 1 -2 3.31 0.83
 -14 1 -2 1.64 0.87
 -14 1 -2 2.57 0.87
 -14 1 -2 3.24 1.03
 -14 1 -2 2.24 1.01
 -14 1 -2 3.7 0.88
 14 -1 2 3.19 0.55
 14 -1 2 3.78 0.83
 14 -1 2 2.08 0.85
 14 -1 2 3.42 0.9
 14 -1 2 2.2 0.98
 -14 1 -3 1.09 1.15
 -14 1 -3 1.09 0.43
 -14 1 -3 1.76 0.88
 -14 1 -3 -0.37 1
 -14 1 -3 0.39 0.9
 -14 1 -3 1.11 0.84
 -14 1 -3 1.19 0.92
 14 -1 3 1.93 1.02
 14 -1 3 1.6 0.88
 14 -1 3 1.09 0.94
 14 -1 3 0.78 0.55
 14 -1 3 1.98 0.86
 -14 1 -4 0.46 1.31
 14 -1 4 2.3 1.13
 -13 1 6 0.56 0.99
 -13 1 6 1.24 0.8
 -13 1 6 2.47 1.04
 -13 1 6 -0.18 1
 -13 1 6 1.54 0.63
 13 -1 -6 1.3 0.78
 13 -1 -6 -1.12 0.96
 13 -1 -6 -1.02 1.07
 13 -1 -6 3.9 1.12
 -13 1 5 0.68 0.81
 -13 1 5 1.91 0.85
 -13 1 5 -0.02 0.71
 -13 1 5 2.22 0.86
 -13 1 5 0.97 0.33
 13 -1 -5 0.8 0.86
 13 -1 -5 -0.16 0.8
 13 -1 -5 0.78 0.75
 13 -1 -5 2.1 0.89
 13 -1 -5 -0.21 0.73
 -13 1 4 10.21 1.14
 -13 1 4 8.29 0.98
 -13 1 4 8.75 0.96
 -13 1 4 7.33 0.91
 13 -1 -4 8.21 0.95
 13 -1 -4 8.86 0.97
 13 -1 -4 10.64 1.2
 13 -1 -4 8.83 0.97
 -13 1 3 1.59 0.74
 -13 1 3 1.18 0.7
 -13 1 3 2.04 0.64
 -13 1 3 0.88 0.67
 13 -1 -3 1.69 0.66
 13 -1 -3 1.42 0.71
 13 -1 -3 1.04 0.43
 13 -1 -3 1 0.66
 13 -1 -3 2.21 0.78
 -13 1 2 0.39 0.64
 -13 1 2 0.73 0.68
 -13 1 2 0.46 0.65
 -13 1 2 -0.36 0.58
 13 -1 -2 -0.48 0.61
 13 -1 -2 -0.12 0.59
 13 -1 -2 0.23 0.71
 13 -1 -2 0.64 0.57
 13 -1 -2 -0.37 0.47
 -13 1 1 18.91 1.17
 -13 1 1 22.58 1.21
 -13 1 1 21.11 1.02
 -13 1 1 20.88 1.24
 -13 1 1 20.38 1.23
 -13 1 1 19.2 1.15
 13 -1 -1 20.19 1.27
 13 -1 -1 19.55 1.14
 13 -1 -1 22.61 1.32
 13 -1 -1 21.37 1.05
 -13 1 0 18.82 1.13
 -13 1 0 19.06 1.19
 -13 1 0 18.3 1.2
 -13 1 0 17.81 1.13
 -13 1 0 18.38 1.16
 -13 1 0 19.79 1.2
 13 -1 0 18.18 1.26
 13 -1 0 19.17 0.97
 13 -1 0 17.96 1.18
 13 -1 0 18.35 1.2
 -13 1 -1 3.13 0.8
 -13 1 -1 3.05 0.76
 -13 1 -1 4.42 0.74
 -13 1 -1 3.1 0.77
 -13 1 -1 1.98 0.67
 -13 1 -1 2.96 0.73
 13 -1 1 2.25 0.71
 13 -1 1 2.31 0.71
 13 -1 1 4.23 0.78
 13 -1 1 2.54 0.74
 13 -1 1 3.04 0.39
 13 -1 1 3.7 0.7
 -13 1 -2 -0.07 0.76
 -13 1 -2 -0.55 0.63
 -13 1 -2 0.17 0.84
 -13 1 -2 0.19 0.69
 -13 1 -2 0.05 0.69
 -13 1 -2 -1.2 0.66
 13 -1 2 0.15 0.63
 13 -1 2 0.24 0.42
 13 -1 2 -1.11 0.76
 13 -1 2 0.38 0.73
 13 -1 2 0.09 0.63
 -13 1 -3 8.03 1.15
 -13 1 -3 8.82 0.69
 -13 1 -3 6.86 1.21
 -13 1 -3 6.73 0.93
 -13 1 -3 8.21 0.97
 -13 1 -3 9.9 1.09
 -13 1 -3 7.63 0.99
 13 -1 3 7.81 0.95
 13 -1 3 10.91 1.26
 13 -1 3 7.48 0.85
 13 -1 3 5.96 0.99
 13 -1 3 6.87 0.99
 -13 1 -4 0.05 0.83
 -13 1 -4 2.13 1.03
 -13 1 -4 0 1.18
 -13 1 -4 2.05 1.09
 -13 1 -4 1.08 0.95
 -13 1 -4 1.67 0.79
 13 -1 4 2.09 0.96
 13 -1 4 1.69 0.63
 13 -1 4 1.79 0.83
 13 -1 4 2.17 0.83
 13 -1 4 1.92 0.95
 -12 1 7 0.72 1.07
 -12 1 7 0.47 1.1
 -12 1 7 0.05 1.05
 12 -1 -7 1.9 1.11
 12 -1 -7 0.04 1.08
 12 -1 -7 1.25 0.94
 -12 1 6 4.81 0.97
 -12 1 6 5.86 1.03
 -12 1 6 4.58 0.93
 12 -1 -6 5.21 0.97
 12 -1 -6 4.93 0.97
 12 -1 -6 2.28 0.96
 12 -1 -6 4 0.7
 -12 1 5 2.66 0.7
 -12 1 5 3.33 0.83
 -12 1 5 2.89 0.48
 -12 1 5 2.82 0.78
 -12 1 5 3.39 0.77
 12 -1 -5 1.71 0.67
 12 -1 -5 2.51 0.8
 12 -1 -5 3.02 0.78
 12 -1 -5 3.89 0.8
 -12 1 4 0.2 0.65
 -12 1 4 -0.58 0.61
 -12 1 4 0.22 0.65
 -12 1 4 0.02 0.52
 12 -1 -4 1.43 0.56
 12 -1 -4 -0.01 0.63
 12 -1 -4 0.38 0.64
 12 -1 -4 -1.08 0.6
 -12 1 3 1.01 0.59
 -12 1 3 0.18 0.59
 -12 1 3 0.64 0.57
 -12 1 3 -0.5 0.58
 12 -1 -3 1.2 0.6
 12 -1 -3 0.07 0.34
 12 -1 -3 0.39 0.59
 12 -1 -3 -0.69 0.55
 12 -1 -3 0.73 0.63
 -12 1 2 16.16 1.06
 -12 1 2 14.83 1.05
 -12 1 2 17.53 1.08
 -12 1 2 16.82 1.1
 12 -1 -2 15.88 1.09
 12 -1 -2 16.42 1.02
 12 -1 -2 13.56 1.1
 12 -1 -2 17.24 1.06
 12 -1 -2 16.55 0.82
 -12 1 1 2.47 0.55
 -12 1 1 2.42 0.59
 -12 1 1 2.41 0.56
 -12 1 1 2.84 0.63
 -12 1 1 2.37 0.44
 -12 1 1 2.45 0.61
 12 -1 -1 2.9 0.64
 12 -1 -1 2.78 0.52
 12 -1 -1 1.72 0.6
 12 -1 -1 3.31 0.7
 -12 1 0 14.4 0.99
 -12 1 0 13.37 1.02
 -12 1 0 15.4 1.05
 -12 1 0 16.4 1.07
 -12 1 0 15.6 1.07
 -12 1 0 16.49 1.08
 12 -1 0 14.12 1.03
 12 -1 0 15.28 1.03
 12 -1 0 14.12 0.84
 12 -1 0 15.18 1.09
 -12 1 -1 0.36 0.54
 -12 1 -1 1.3 0.62
 -12 1 -1 0.95 0.6
 -12 1 -1 0.62 0.55
 -12 1 -1 0.13 0.55
 -12 1 -1 -0.41 0.48
 12 -1 1 0.82 0.6
 12 -1 1 1.23 0.59
 12 -1 1 1.02 0.54
 12 -1 1 0.39 0.34
 12 -1 1 0.16 0.52
 -12 1 -2 1.4 0.72
 -12 1 -2 0.22 0.57
 -12 1 -2 -0.37 0.5
 -12 1 -2 -0.77 0.55
 -12 1 -2 0.31 0.72
 -12 1 -2 0.08 0.59
 12 -1 2 0.99 0.62
 12 -1 2 0.07 0.38
 12 -1 2 0.34 0.58
 12 -1 2 0.57 0.54
 12 -1 2 0.12 0.69
 -12 1 -3 11.29 1.12
 -12 1 -3 10.55 0.63
 -12 1 -3 9.43 0.98
 -12 1 -3 10.44 1.03
 -12 1 -3 11.95 1.13
 -12 1 -3 7.78 1.1
 -12 1 -3 10.73 1.11
 12 -1 3 9.69 0.98
 12 -1 3 10.07 1.14
 12 -1 3 12.37 1.14
 12 -1 3 10.03 0.83
 12 -1 3 12.77 1.11
 -12 1 -4 2.71 0.83
 -12 1 -4 2.24 0.93
 -12 1 -4 2.59 0.71
 -12 1 -4 2.01 0.7
 -12 1 -4 2.3 1.08
 12 -1 4 2.83 0.87
 12 -1 4 3.33 0.86
 12 -1 4 2.68 0.62
 12 -1 4 4.05 0.76
 12 -1 4 2.94 0.77
 -12 1 -5 -0.91 1.16
 -12 1 -5 -0.11 0.95
 -12 1 -5 2.61 0.79
 -12 1 -5 1.78 1.04
 12 -1 5 1.09 0.95
 12 -1 5 1.08 0.72
 12 -1 5 -0.49 0.74
 12 -1 5 0.56 0.93
 -11 1 7 0.71 0.93
 -11 1 7 -0.42 0.9
 -11 1 7 0.62 0.96
 11 -1 -7 -0.49 0.84
 11 -1 -7 -0.07 0.99
 11 -1 -7 0.65 0.91
 11 -1 -7 0.61 0.98
 -11 1 6 6.93 0.97
 -11 1 6 6.99 0.91
 -11 1 6 4.35 0.87
 11 -1 -6 4.79 0.95
 11 -1 -6 6.3 0.94
 11 -1 -6 7.7 0.9
 11 -1 -6 6.24 0.82
 11 -1 -6 6.92 0.98
 -11 1 5 1.81 0.7
 -11 1 5 1.46 0.66
 -11 1 5 2.8 0.74
 11 -1 -5 2.24 0.65
 11 -1 -5 2.04 0.71
 11 -1 -5 2.56 0.76
 11 -1 -5 1.63 0.59
 -11 1 4 11.76 1
 -11 1 4 10.29 0.98
 -11 1 4 11.66 0.56
 -11 1 4 11.68 0.9
 -11 1 4 12.82 1.02
 -11 1 4 11.42 0.96
 11 -1 -4 13.22 1.11
 11 -1 -4 13.56 1.02
 11 -1 -4 12.32 1.03
 -11 1 3 -0.13 0.52
 -11 1 3 0.3 0.5
 -11 1 3 0.69 0.53
 -11 1 3 0.97 0.51
 11 -1 -3 0.63 0.57
 11 -1 -3 0.53 0.49
 11 -1 -3 0.39 0.29
 11 -1 -3 0.6 0.51
 11 -1 -3 1.42 0.52
 -11 1 2 5.46 0.69
 -11 1 2 5.24 0.63
 -11 1 2 5.2 0.65
 -11 1 2 6.71 0.75
 11 -1 -2 5.34 0.69
 11 -1 -2 5.38 0.73
 11 -1 -2 5.46 0.6
 11 -1 -2 4.98 0.64
 11 -1 -2 5.37 0.61
 11 -1 -2 6.61 0.72
 -11 1 1 1.26 0.5
 -11 1 1 0.4 0.35
 -11 1 1 0.75 0.49
 -11 1 1 0.79 0.49
 -11 1 1 1.38 0.52
 -11 1 1 0.68 0.45
 11 -1 -1 0.72 0.47
 11 -1 -1 0.37 0.4
 11 -1 -1 1.58 0.51
 11 -1 -1 1.08 0.53
 -11 1 0 0.93 0.49
 -11 1 0 0.67 0.45
 -11 1 0 0.28 0.49
 -11 1 0 1.02 0.5
 -11 1 0 0.54 0.44
 -11 1 0 2 0.51
 11 -1 0 0.71 0.48
 11 -1 0 0.39 0.47
 11 -1 0 1.04 0.53
 -11 1 -1 10.25 0.87
 -11 1 -1 11.01 1.1
 -11 1 -1 10.76 0.83
 -11 1 -1 8.66 0.94
 -11 1 -1 9.64 0.87
 -11 1 -1 9.85 0.88
 11 -1 1 8.68 0.82
 11 -1 1 9.55 0.85
 11 -1 1 10.13 0.85
 11 -1 1 11.16 0.93
 -11 1 -2 14.77 1.07
 -11 1 -2 16.32 1.01
 -11 1 -2 14.21 0.94
 -11 1 -2 15.79 1.35
 -11 1 -2 15.58 0.96
 -11 1 -2 14.18 1.04
 11 -1 2 13.61 0.98
 11 -1 2 16.25 0.77
 11 -1 2 15.68 1.03
 11 -1 2 15.68 1.02
 11 -1 2 15.18 1.09
 -11 1 -3 0.97 0.57
 -11 1 -3 0.13 0.73
 -11 1 -3 0.38 0.67
 -11 1 -3 -0.04 0.57
 -11 1 -3 1.06 0.31
 -11 1 -3 -0.42 0.52
 11 -1 3 1.28 0.6
 11 -1 3 1.03 0.58
 11 -1 3 -0.22 0.62
 11 -1 3 0.21 0.4
 11 -1 3 0.13 0.51
 -11 1 -4 2.36 0.79
 -11 1 -4 1.81 0.72
 -11 1 -4 1.17 0.58
 -11 1 -4 1.24 0.91
 -11 1 -4 3.16 0.66
 11 -1 4 1.49 0.7
 11 -1 4 2.62 0.55
 11 -1 4 1.61 0.62
 11 -1 4 2.56 0.73
 11 -1 4 4.06 0.71
 -11 1 -5 4.82 1.01
 -11 1 -5 4.55 0.81
 -11 1 -5 5.75 0.99
 -11 1 -5 3.91 1.08
 -11 1 -5 5.53 0.81
 11 -1 5 4.11 0.72
 11 -1 5 4.77 0.73
 11 -1 5 4.31 0.74
 11 -1 5 4.81 0.88
 11 -1 5 4.85 0.96
 -11 1 -6 9.18 1.28
 11 -1 6 8.57 1.03
 11 -1 6 13.8 1.39
 -10 1 8 -0.23 1.12
 -10 1 8 1.76 1.25
 -10 1 8 -1.05 1.04
 10 -1 -8 0.93 1.12
 10 -1 -8 1.04 1.14
 10 -1 -8 0.01 1.19
 -10 1 7 5.38 1.14
 -10 1 7 5.67 0.98
 -10 1 7 6.63 1
 -10 1 7 5.93 0.97
 10 -1 -7 6.69 1.07
 10 -1 -7 4.97 0.95
 10 -1 -7 5.44 0.91
 10 -1 -7 6.58 0.87
 10 -1 -7 5.61 0.68
 -10 1 6 -0.07 0.68
 -10 1 6 0.54 0.65
 -10 1 6 0.7 0.72
 10 -1 -6 0.44 0.69
 10 -1 -6 0.37 0.73
 10 -1 -6 0.17 0.38
 10 -1 -6 1.96 0.62
 10 -1 -6 -1.26 0.69
 10 -1 -6 0.2 0.34
 10 -1 -6 0.17 0.3
 -10 1 5 13.97 1.04
 -10 1 5 14.58 1.08
 -10 1 5 14.73 1.05
 10 -1 -5 14.83 1.07
 10 -1 -5 13.8 1.12
 10 -1 -5 15.24 1.07
 10 -1 -5 17.65 1.14
 10 -1 -5 16.7 0.92
 -10 1 4 13.25 0.95
 -10 1 4 11.28 0.91
 -10 1 4 11.63 0.92
 10 -1 -4 11.99 1
 10 -1 -4 11.85 0.92
 10 -1 -4 12.72 0.93
 -10 1 3 53.92 1.46
 -10 1 3 52.81 1.49
 -10 1 3 53.09 1.55
 -10 1 3 56.33 1.52
 -10 1 3 52.28 0.97
 10 -1 -3 53.79 1.02
 10 -1 -3 55.33 1.52
 10 -1 -3 54.46 1.5
 10 -1 -3 53.76 1.51
 -10 1 2 1.21 0.45
 -10 1 2 1.01 0.46
 -10 1 2 0.66 0.41
 -10 1 2 1.26 0.46
 10 -1 -2 1.5 0.49
 10 -1 -2 1.39 0.44
 10 -1 -2 0.46 0.46
 10 -1 -2 1.78 0.5
 10 -1 -2 1.12 0.43
 10 -1 -2 1.39 0.33
 -10 1 1 29.07 1.11
 -10 1 1 27.79 1.03
 -10 1 1 28.7 1.08
 -10 1 1 27.9 1.04
 -10 1 1 29.19 0.97
 -10 1 1 28.66 1.08
 10 -1 -1 29.71 1.08
 10 -1 -1 28.21 1.1
 10 -1 -1 28.66 1.11
 10 -1 -1 29.13 0.95
 -10 1 0 52.59 1.48
 -10 1 0 53.08 1.34
 -10 1 0 50.56 1.44
 -10 1 0 51.92 1.46
 -10 1 0 53.74 1.56
 -10 1 0 53.57 1.45
 10 -1 0 52.69 1.44
 10 -1 0 53.07 1.44
 10 -1 0 53.06 1.45
 10 -1 0 52.34 0.96
 10 -1 0 53.9 1.49
 -10 1 -1 26.53 1.11
 -10 1 -1 25.9 0.95
 -10 1 -1 25.18 1.02
 -10 1 -1 25.85 1.25
 -10 1 -1 23.45 1.05
 -10 1 -1 26.52 1.06
 10 -1 1 27.05 1.03
 10 -1 1 23.89 1.02
 10 -1 1 25.21 1.09
 10 -1 1 24.9 0.97
 -10 1 -2 3.92 0.62
 -10 1 -2 3.93 0.63
 -10 1 -2 5.26 0.62
 -10 1 -2 3.71 0.68
 -10 1 -2 4.39 0.61
 -10 1 -2 4.55 0.58
 10 -1 2 4.39 0.59
 10 -1 2 4.15 0.43
 10 -1 2 4.26 0.59
 10 -1 2 3.71 0.59
 -10 1 -3 2.57 0.68
 -10 1 -3 3.12 0.61
 -10 1 -3 2.95 0.33
 -10 1 -3 2.78 0.68
 -10 1 -3 2.64 0.57
 -10 1 -3 1.79 0.57
 10 -1 3 3.55 0.64
 10 -1 3 2.57 0.59
 10 -1 3 2.67 0.43
 10 -1 3 2.71 0.62
 10 -1 3 2.8 0.56
 -10 1 -4 1.21 0.81
 -10 1 -4 0.94 0.67
 -10 1 -4 0.62 0.57
 -10 1 -4 2.29 0.6
 -10 1 -4 1.73 0.51
 10 -1 4 1.21 0.6
 10 -1 4 2 0.52
 10 -1 4 1.42 0.58
 10 -1 4 2.56 0.65
 10 -1 4 1.9 0.61
 -10 1 -5 2.7 0.67
 -10 1 -5 3.09 0.69
 -10 1 -5 3.32 0.79
 -10 1 -5 1.96 0.86
 10 -1 5 4.23 0.7
 10 -1 5 2.87 0.66
 10 -1 5 4.26 0.72
 10 -1 5 2.84 0.77
 10 -1 5 3.14 0.86
 10 -1 5 3.12 0.72
 -10 1 -6 1.95 0.94
 -10 1 -6 1.09 0.96
 10 -1 6 2.33 0.7
 10 -1 6 3.47 1
 10 -1 6 2.33 0.83
 10 -1 6 4.04 0.92
 -9 1 8 -0.51 1.11
 -9 1 8 -0.32 0.99
 9 -1 -8 -0.06 1.01
 9 -1 -8 0.35 1.02
 9 -1 -8 1.52 0.82
 9 -1 -8 -0.7 0.84
 9 -1 -8 -0.26 1.02
 -9 1 7 0.04 0.74
 -9 1 7 -0.37 0.72
 -9 1 7 0.18 0.7
 -9 1 7 -0.92 0.76
 9 -1 -7 0.49 0.69
 9 -1 -7 -0.78 0.74
 9 -1 -7 0.2 0.75
 9 -1 -7 -0.81 0.59
 9 -1 -7 0.67 0.71
 -9 1 6 4.95 0.73
 -9 1 6 5.34 0.76
 -9 1 6 5.19 0.74
 9 -1 -6 5.27 0.72
 9 -1 -6 4.96 0.75
 9 -1 -6 4.37 0.53
 9 -1 -6 3.35 0.75
 9 -1 -6 5.43 0.77
 -9 1 5 27.68 1.13
 -9 1 5 28.99 1.2
 -9 1 5 28.87 1.19
 9 -1 -5 27.57 0.88
 9 -1 -5 27.5 0.83
 9 -1 -5 27.86 1.26
 9 -1 -5 28.42 1.2
 9 -1 -5 29.52 1.18
 9 -1 -5 27.46 1.2
 9 -1 -5 28.45 0.93
 -9 1 4 1.19 0.45
 -9 1 4 0.96 0.49
 -9 1 4 0.99 0.45
 9 -1 -4 0.69 0.5
 9 -1 -4 1.7 0.53
 9 -1 -4 1.38 0.51
 -9 1 3 -0.19 0.37
 -9 1 3 0.23 0.35
 -9 1 3 0.33 0.39
 -9 1 3 0.36 0.41
 -9 1 3 0.03 0.21
 9 -1 -3 -0.51 0.38
 9 -1 -3 0.47 0.37
 9 -1 -3 -0.19 0.42
 -9 1 2 22.33 0.89
 -9 1 2 22.9 0.97
 -9 1 2 23.18 0.92
 -9 1 2 21.62 0.9
 9 -1 -2 22.04 0.89
 9 -1 -2 22.04 0.86
 9 -1 -2 21.7 0.93
 9 -1 -2 21.67 0.66
 9 -1 -2 22.53 0.91
 -9 1 1 19.53 0.84
 -9 1 1 20.19 0.88
 -9 1 1 20.72 0.88
 -9 1 1 19.71 0.83
 -9 1 1 18.43 0.86
 -9 1 1 20.5 0.76
 9 -1 -1 20.87 0.92
 9 -1 -1 20.74 0.79
 9 -1 -1 20.44 0.87
 9 -1 -1 21.82 0.92
 -9 1 0 13.17 0.76
 -9 1 0 12.2 0.75
 -9 1 0 13.28 0.79
 -9 1 0 12.95 0.7
 -9 1 0 13.02 0.79
 -9 1 0 13.8 0.79
 9 -1 0 11.89 0.39
 9 -1 0 11.88 0.74
 9 -1 0 12.54 0.74
 9 -1 0 13.63 0.79
 9 -1 0 13.35 0.75
 -9 1 -1 7.14 0.64
 -9 1 -1 7.58 0.73
 -9 1 -1 8.42 0.74
 -9 1 -1 7.76 0.85
 -9 1 -1 7.52 0.62
 -9 1 -1 7.34 0.64
 9 -1 1 8.55 0.7
 9 -1 1 7.87 0.67
 9 -1 1 6.16 0.64
 9 -1 1 8.72 0.72
 -9 1 -2 4.18 0.56
 -9 1 -2 3.52 0.58
 -9 1 -2 5.8 0.65
 -9 1 -2 5.23 0.58
 -9 1 -2 5.03 0.56
 9 -1 2 4.7 0.54
 9 -1 2 4.47 0.57
 9 -1 2 4.94 0.58
 9 -1 2 6.22 0.67
 -9 1 -3 1.11 0.26
 -9 1 -3 0.89 0.48
 -9 1 -3 0.82 0.45
 -9 1 -3 1.51 0.55
 -9 1 -3 0.22 0.54
 -9 1 -3 0.58 0.42
 9 -1 3 1.08 0.46
 9 -1 3 0.7 0.35
 9 -1 3 1.29 0.51
 9 -1 3 1.48 0.48
 9 -1 3 0.97 0.49
 -9 1 -4 12.75 0.97
 -9 1 -4 11.36 0.89
 -9 1 -4 10.77 0.98
 -9 1 -4 10.04 1.25
 -9 1 -4 9.17 0.9
 9 -1 4 11.31 0.99
 9 -1 4 11.43 0.86
 9 -1 4 10.37 0.95
 9 -1 4 9.56 0.89
 9 -1 4 12.05 0.84
 9 -1 4 10.93 0.86
 -9 1 -5 18.88 1.29
 -9 1 -5 19.95 1.11
 -9 1 -5 20.31 1.05
 -9 1 -5 16.46 1.52
 9 -1 5 22.1 1.16
 9 -1 5 18.8 1.16
 9 -1 5 21.01 1.16
 9 -1 5 19.4 1.03
 9 -1 5 19.24 1.13
 9 -1 5 19.21 1.27
 -9 1 -6 1.41 0.83
 -9 1 -6 1.56 0.71
 -9 1 -6 -0.82 0.54
 9 -1 6 0.3 0.81
 9 -1 6 1.82 0.64
 9 -1 6 -0.96 0.7
 9 -1 6 0.75 0.7
 9 -1 6 -1.07 0.58
 -9 1 -7 0.66 1.04
 -9 1 -7 0.67 1.08
 9 -1 7 -0.9 1.12
 9 -1 7 0.75 0.96
 -8 1 8 1.8 0.95
 -8 1 8 2.51 1.05
 8 -1 -8 0.28 0.7
 8 -1 -8 1.03 0.92
 8 -1 -8 0.31 0.89
 8 -1 -8 0.57 0.93
 8 -1 -8 0.22 0.89
 8 -1 -8 4.1 1.04
 -8 1 7 7.85 0.94
 -8 1 7 6.82 1.01
 8 -1 -7 9.54 1.01
 8 -1 -7 7.76 0.94
 8 -1 -7 8.55 0.93
 8 -1 -7 6.07 0.8
 -8 1 6 0.93 0.59
 -8 1 6 1.44 0.59
 8 -1 -6 0.56 0.56
 8 -1 -6 1.76 0.6
 8 -1 -6 1.01 0.51
 8 -1 -6 0.99 0.6
 8 -1 -6 -0.09 0.5
 -8 1 5 7.26 0.79
 -8 1 5 7.1 0.78
 -8 1 5 7.25 0.8
 8 -1 -5 6.8 0.53
 8 -1 -5 7.49 0.81
 8 -1 -5 8.38 0.82
 8 -1 -5 7.29 0.7
 8 -1 -5 8.47 0.77
 8 -1 -5 7.43 0.84
 -8 1 4 0.4 0.39
 -8 1 4 0.04 0.38
 -8 1 4 0.44 0.39
 8 -1 -4 0.2 0.37
 8 -1 -4 0.11 0.24
 8 -1 -4 0.14 0.2
 8 -1 -4 0.7 0.44
 8 -1 -4 -0.05 0.34
 8 -1 -4 -0.03 0.42
 8 -1 -4 -0.42 0.4
 -8 1 3 8.35 0.64
 -8 1 3 8.5 0.65
 -8 1 3 9.28 0.65
 8 -1 -3 9.19 0.68
 8 -1 -3 9.28 0.67
 8 -1 -3 8.32 0.71
 -8 1 2 13.56 0.74
 -8 1 2 15.31 0.69
 -8 1 2 13.27 0.69
 -8 1 2 15.04 0.72
 8 -1 -2 14.87 0.7
 8 -1 -2 14.52 0.72
 8 -1 -2 14.46 0.72
 8 -1 -2 13.57 0.45
 8 -1 -2 13.78 0.5
 -8 1 1 55.09 1.35
 -8 1 1 53.3 1.31
 -8 1 1 54.36 1.36
 -8 1 1 56.93 1.37
 -8 1 1 52.26 1.27
 -8 1 1 52.24 1.26
 8 -1 -1 53.77 1.26
 8 -1 -1 53.99 1.33
 8 -1 -1 55.78 1.23
 8 -1 -1 54.7 1.37
 8 -1 -1 55.36 1.38
 -8 1 0 7.43 0.64
 -8 1 0 6.82 0.54
 -8 1 0 7.54 0.6
 -8 1 0 6.84 0.61
 -8 1 0 7.88 0.65
 -8 1 0 6.99 0.57
 8 -1 0 7.51 0.62
 8 -1 0 7.69 0.63
 8 -1 0 7.41 0.63
 8 -1 0 7.22 0.61
 8 -1 0 6.93 0.31
 -8 1 -1 1.61 0.36
 -8 1 -1 1.38 0.37
 -8 1 -1 2.91 0.45
 -8 1 -1 2.26 0.46
 -8 1 -1 2.07 0.4
 -8 1 -1 1.99 0.43
 8 -1 1 1.83 0.4
 8 -1 1 2.12 0.39
 8 -1 1 1.94 0.42
 8 -1 1 1.79 0.38
 -8 1 -2 20.95 0.87
 -8 1 -2 21.58 0.94
 -8 1 -2 21.68 0.94
 -8 1 -2 20.78 0.9
 -8 1 -2 21.46 1.11
 8 -1 2 21.45 0.73
 8 -1 2 20.64 0.9
 8 -1 2 23.26 0.98
 8 -1 2 21.21 0.89
 -8 1 -3 36.04 1.24
 -8 1 -3 31.38 1.16
 -8 1 -3 34.1 1.51
 -8 1 -3 34.38 0.78
 -8 1 -3 34.97 1.16
 -8 1 -3 36.34 1.18
 8 -1 3 34.78 1.21
 8 -1 3 33.66 1.15
 8 -1 3 32.68 1.13
 8 -1 3 32.87 1.19
 8 -1 3 33.36 0.97
 8 -1 3 31.99 1.09
 -8 1 -4 1.13 0.53
 -8 1 -4 0.89 0.5
 -8 1 -4 -0.06 0.55
 -8 1 -4 0.48 0.45
 -8 1 -4 0.62 0.41
 8 -1 4 0.13 0.45
 8 -1 4 -0.6 0.4
 8 -1 4 0.23 0.42
 8 -1 4 0.77 0.4
 8 -1 4 0.46 0.51
 8 -1 4 -0.04 0.41
 -8 1 -5 -0.46 0.58
 -8 1 -5 0.08 0.47
 -8 1 -5 -0.5 0.59
 -8 1 -5 -0.08 0.54
 8 -1 5 1.25 0.52
 8 -1 5 0.3 0.6
 8 -1 5 0.68 0.53
 8 -1 5 0.29 0.46
 8 -1 5 0.28 0.44
 8 -1 5 0.48 0.45
 -8 1 -6 2.67 0.66
 -8 1 -6 -0.25 0.68
 -8 1 -6 1.72 0.59
 -8 1 -6 2.11 0.71
 8 -1 6 1.94 0.69
 8 -1 6 1.18 0.78
 8 -1 6 1.85 0.7
 8 -1 6 0.38 0.58
 -8 1 -7 1.63 0.93
 -8 1 -7 2.21 0.78
 -8 1 -7 1.93 0.97
 8 -1 7 2.81 0.76
 8 -1 7 2.16 0.91
 8 -1 7 0.95 1.04
 8 -1 7 1.31 0.9
 -7 1 8 0 0.93
 -7 1 8 -0.43 0.85
 -7 1 8 -0.54 0.6
 7 -1 -8 -0.82 0.87
 7 -1 -8 -1.24 0.62
 7 -1 -8 -1 0.74
 7 -1 -8 0.42 0.88
 7 -1 -8 -0.28 0.81
 7 -1 -8 0.46 0.87
 -7 1 7 9.95 1.27
 -7 1 7 7.75 0.88
 -7 1 7 7.91 0.86
 7 -1 -7 8.99 0.93
 7 -1 -7 7.09 0.86
 7 -1 -7 8.95 1.08
 7 -1 -7 9.12 1.1
 -7 1 6 2.34 0.57
 -7 1 6 1.98 0.63
 -7 1 6 2.82 0.54
 -7 1 6 2.82 0.61
 7 -1 -6 2.52 0.57
 7 -1 -6 2.23 0.58
 7 -1 -6 2.37 0.57
 7 -1 -6 2.14 0.53
 -7 1 5 1.21 0.46
 -7 1 5 0.92 0.46
 -7 1 5 1.1 0.44
 7 -1 -5 1.23 0.42
 7 -1 -5 1.25 0.49
 7 -1 -5 1.65 0.51
 7 -1 -5 1.02 0.23
 7 -1 -5 1.09 0.47
 -7 1 4 1.27 0.38
 -7 1 4 1.05 0.39
 -7 1 4 1.54 0.39
 7 -1 -4 1.19 0.29
 7 -1 -4 1.87 0.49
 7 -1 -4 1.35 0.38
 7 -1 -4 1.14 0.44
 7 -1 -4 1.44 0.4
 -7 1 3 88.83 1.77
 -7 1 3 87.27 1.82
 -7 1 3 89.59 1.83
 7 -1 -3 88.65 1.82
 7 -1 -3 92.5 1.77
 7 -1 -3 88.37 1.87
 7 -1 -3 88.39 1.8
 7 -1 -3 88.7 1.85
 -7 1 2 27.11 0.84
 -7 1 2 26.7 0.59
 -7 1 2 27.5 0.85
 -7 1 2 27.22 0.89
 -7 1 2 26.7 0.87
 7 -1 -2 27.12 0.65
 7 -1 -2 27.22 0.87
 7 -1 -2 28.16 0.87
 7 -1 -2 28.87 0.88
 7 -1 -2 27.36 0.61
 -7 1 1 51.47 1.23
 -7 1 1 50.38 1.17
 -7 1 1 51.06 1.19
 -7 1 1 51.2 1.24
 -7 1 1 52.33 1.23
 -7 1 1 52.12 1.28
 7 -1 -1 51.46 1.15
 7 -1 -1 52.67 1.23
 7 -1 -1 50.9 1.24
 7 -1 -1 53.22 1.25
 7 -1 -1 51.93 1.18
 -7 1 0 17.59 0.75
 -7 1 0 18.13 0.74
 -7 1 0 18.29 0.77
 -7 1 0 16.95 0.75
 -7 1 0 17.32 0.67
 -7 1 0 18.34 0.77
 7 -1 0 17.33 0.75
 7 -1 0 17.71 0.77
 7 -1 0 16.45 0.75
 7 -1 0 17.96 0.79
 7 -1 0 18.4 0.75
 -7 1 -1 57.68 1.27
 -7 1 -1 61.23 1.43
 -7 1 -1 61.47 1.42
 -7 1 -1 61.49 1.66
 -7 1 -1 63.42 1.46
 -7 1 -1 59.73 1.4
 7 -1 1 60.11 1.32
 7 -1 1 61.76 1.43
 7 -1 1 58.04 1.37
 7 -1 1 58.91 1.42
 -7 1 -2 0.03 0.34
 -7 1 -2 0.46 0.35
 -7 1 -2 0.12 0.35
 -7 1 -2 -0.04 0.39
 -7 1 -2 -0.36 0.33
 7 -1 2 0.18 0.31
 7 -1 2 -0.23 0.32
 7 -1 2 -0.12 0.24
 7 -1 2 0.28 0.33
 -7 1 -3 1.27 0.42
 -7 1 -3 1.33 0.42
 -7 1 -3 1.44 0.43
 -7 1 -3 1.43 0.22
 -7 1 -3 1.32 0.52
 -7 1 -3 1.67 0.43
 7 -1 3 1.27 0.41
 7 -1 3 1.54 0.42
 7 -1 3 1.31 0.33
 7 -1 3 2.07 0.47
 7 -1 3 1.11 0.38
 7 -1 3 1.32 0.38
 -7 1 -4 1.7 0.49
 -7 1 -4 1.11 0.41
 -7 1 -4 1.36 0.45
 -7 1 -4 0.86 0.32
 -7 1 -4 0.42 0.48
 -7 1 -4 1.6 0.46
 7 -1 4 0.57 0.42
 7 -1 4 0.93 0.45
 7 -1 4 1.25 0.43
 7 -1 4 0.43 0.38
 7 -1 4 1.32 0.47
 7 -1 4 1.06 0.41
 -7 1 -5 4.97 0.8
 -7 1 -5 6.53 0.76
 -7 1 -5 5.06 0.66
 -7 1 -5 4.82 0.61
 7 -1 5 6.2 0.61
 7 -1 5 5.94 0.67
 7 -1 5 4.98 0.68
 7 -1 5 6.82 0.72
 7 -1 5 5.66 0.63
 7 -1 5 5.36 0.64
 -7 1 -6 1.12 0.66
 -7 1 -6 2.01 0.36
 -7 1 -6 -0.12 0.63
 -7 1 -6 1.03 0.58
 -7 1 -6 0.67 0.68
 -7 1 -6 0.8 0.5
 7 -1 6 2.11 0.65
 7 -1 6 2.7 0.76
 7 -1 6 1.19 0.62
 7 -1 6 1.57 0.57
 7 -1 6 1.02 0.62
 -7 1 -7 4.49 0.75
 -7 1 -7 3.62 0.94
 -7 1 -7 5.56 0.92
 -7 1 -7 5.37 0.8
 7 -1 7 5.56 0.96
 7 -1 7 5.25 0.81
 7 -1 7 6.32 0.93
 7 -1 7 6 1.02
 7 -1 7 4.28 0.7
 -6 1 9 5.46 1.29
 -6 1 9 6.51 1.25
 6 -1 -9 4.84 1.21
 6 -1 -9 6.29 1.28
 6 -1 -9 3.54 1.33
 6 -1 -9 4.25 1.18
 -6 1 8 5 1
 -6 1 8 5.78 0.97
 -6 1 8 3.96 0.73
 -6 1 8 6.43 1.03
 6 -1 -8 4.95 0.76
 6 -1 -8 7.4 1.02
 6 -1 -8 4.11 0.96
 6 -1 -8 6.09 0.94
 6 -1 -8 4.19 1.03
 6 -1 -8 5.64 0.8
 -6 1 7 2.05 0.73
 -6 1 7 1.8 0.62
 -6 1 7 1.23 0.56
 6 -1 -7 1.27 0.67
 6 -1 -7 1.25 0.71
 6 -1 -7 0.97 0.56
 6 -1 -7 2.38 0.68
 6 -1 -7 1.15 0.72
 -6 1 6 3.72 0.61
 -6 1 6 5.15 0.63
 -6 1 6 3.89 0.67
 6 -1 -6 5.01 0.65
 6 -1 -6 4.73 0.65
 6 -1 -6 5.09 0.69
 6 -1 -6 4.59 0.66
 -6 1 5 26.78 0.93
 -6 1 5 28.28 1
 -6 1 5 27.57 1.08
 6 -1 -5 28.9 1.03
 6 -1 -5 25.26 1.04
 6 -1 -5 27.51 1.03
 6 -1 -5 28.32 1.16
 -6 1 4 24.49 0.9
 -6 1 4 24.56 0.92
 -6 1 4 23.85 0.82
 6 -1 -4 24.7 0.66
 6 -1 -4 25.42 0.95
 6 -1 -4 24.9 0.86
 6 -1 -4 26.36 0.92
 -6 1 3 0.66 0.32
 -6 1 3 0.44 0.32
 -6 1 3 0.87 0.3
 6 -1 -3 0.33 0.32
 6 -1 -3 1.11 0.4
 6 -1 -3 0.61 0.3
 6 -1 -3 0.68 0.33
 -6 1 2 1.3 0.32
 -6 1 2 2.28 0.35
 -6 1 2 1.39 0.31
 6 -1 -2 1.08 0.31
 6 -1 -2 1.64 0.26
 6 -1 -2 1.09 0.17
 6 -1 -2 1.4 0.33
 6 -1 -2 1.03 0.32
 -6 1 1 13.49 0.6
 -6 1 1 12.77 0.67
 -6 1 1 13.08 0.5
 -6 1 1 12.06 0.62
 -6 1 1 12.92 0.59
 -6 1 1 12.67 0.58
 6 -1 -1 13.17 0.59
 6 -1 -1 13.36 0.51
 6 -1 -1 13.55 0.65
 6 -1 -1 13.25 0.58
 -6 1 0 15.81 0.7
 -6 1 0 16.58 0.7
 -6 1 0 15.67 0.69
 -6 1 0 15.51 0.59
 -6 1 0 16 0.72
 6 -1 0 14.92 0.69
 6 -1 0 15.38 0.69
 6 -1 0 15.29 0.7
 6 -1 0 16.14 0.65
 6 -1 0 15.45 0.71
 -6 1 -1 13.55 0.69
 -6 1 -1 12.98 0.75
 -6 1 -1 14.48 0.66
 -6 1 -1 13.67 0.71
 -6 1 -1 12.55 0.67
 6 -1 1 13.69 0.57
 6 -1 1 13.36 0.66
 6 -1 1 14.6 0.68
 6 -1 1 13.1 0.68
 -6 1 -2 71.06 1.51
 -6 1 -2 69.29 1.56
 -6 1 -2 68.88 1.89
 -6 1 -2 68.12 1.57
 -6 1 -2 72.36 1.52
 6 -1 2 69.14 1.56
 6 -1 2 68.23 1.49
 6 -1 2 68.32 1.57
 6 -1 2 68.28 1.36
 6 -1 2 67.81 1.48
 -6 1 -3 5.96 0.85
 -6 1 -3 6.54 0.35
 -6 1 -3 5.27 0.59
 -6 1 -3 5.25 0.42
 -6 1 -3 5.89 0.58
 -6 1 -3 5.45 0.59
 -6 1 -3 6.58 0.58
 6 -1 3 6.29 0.52
 6 -1 3 6.65 0.55
 6 -1 3 6.26 0.57
 -6 1 -4 0.85 0.42
 -6 1 -4 1.28 0.47
 -6 1 -4 0.76 0.53
 -6 1 -4 0.45 0.39
 -6 1 -4 1.16 0.42
 -6 1 -4 1.28 0.28
 6 -1 4 0.71 0.38
 6 -1 4 1.03 0.39
 6 -1 4 1.58 0.45
 6 -1 4 0.68 0.39
 6 -1 4 0.81 0.33
 6 -1 4 1.3 0.46
 -6 1 -5 28.65 1.23
 -6 1 -5 26.47 0.75
 -6 1 -5 29.38 1.12
 -6 1 -5 27.66 1.1
 -6 1 -5 26.84 1.51
 6 -1 5 29.69 1.19
 6 -1 5 27.75 1.12
 6 -1 5 27.64 1.08
 6 -1 5 27.27 1.11
 6 -1 5 28.79 1.14
 -6 1 -6 0.78 0.51
 -6 1 -6 1.2 0.58
 -6 1 -6 0.37 0.34
 -6 1 -6 -0.22 0.55
 -6 1 -6 0.22 0.59
 6 -1 6 1.1 0.53
 6 -1 6 1.1 0.66
 6 -1 6 0.19 0.56
 6 -1 6 0.85 0.49
 6 -1 6 0.96 0.51
 -6 1 -7 1.83 0.62
 -6 1 -7 -0.06 0.67
 -6 1 -7 0.1 0.37
 -6 1 -7 0.49 0.59
 6 -1 7 1.17 0.61
 6 -1 7 1.03 0.83
 6 -1 7 1.38 0.6
 6 -1 7 1.57 0.65
 6 -1 7 0.06 0.74
 -6 1 -8 0.49 0.88
 6 -1 8 0.43 1.1
 6 -1 8 0.42 1
 -5 1 9 1.15 1.04
 -5 1 9 1.35 1.11
 -5 1 9 2.16 1.11
 5 -1 -9 1.1 1.1
 5 -1 -9 1.47 1.09
 5 -1 -9 0.47 1.22
 5 -1 -9 4.7 1.16
 -5 1 8 2.29 0.89
 -5 1 8 1.48 0.82
 -5 1 8 1.68 0.84
 -5 1 8 0.49 0.54
 5 -1 -8 2.04 0.8
 5 -1 -8 1.29 0.58
 5 -1 -8 0.67 0.61
 5 -1 -8 -0.12 0.87
 5 -1 -8 1.98 0.78
 5 -1 -8 2.94 0.86
 -5 1 7 5.51 0.73
 -5 1 7 5.58 0.77
 -5 1 7 6.11 0.8
 5 -1 -7 4.68 0.86
 5 -1 -7 5.72 0.78
 5 -1 -7 5.78 0.77
 5 -1 -7 6.37 0.8
 5 -1 -7 4.33 0.63
 -5 1 6 5.43 0.65
 -5 1 6 4.8 0.61
 -5 1 6 6.97 0.87
 5 -1 -6 7.07 1.05
 5 -1 -6 6.67 0.7
 5 -1 -6 6.36 0.67
 5 -1 -6 5.55 0.65
 -5 1 5 0.95 0.41
 -5 1 5 0.25 0.38
 -5 1 5 0.52 0.36
 5 -1 -5 0.84 0.38
 5 -1 -5 0.88 0.42
 5 -1 -5 0.42 0.4
 5 -1 -5 0.71 0.44
 -5 1 4 6.49 0.24
 -5 1 4 6.47 0.59
 -5 1 4 6.39 0.6
 -5 1 4 6.96 0.55
 5 -1 -4 7.73 0.67
 5 -1 -4 6.29 0.29
 5 -1 -4 7.49 0.6
 5 -1 -4 7.39 0.59
 -5 1 3 6.19 0.51
 -5 1 3 5.76 0.59
 -5 1 3 6.15 0.49
 5 -1 -3 5.42 0.5
 5 -1 -3 5.6 0.6
 5 -1 -3 6.31 0.53
 -5 1 2 1.45 0.31
 -5 1 2 1.39 0.3
 -5 1 2 1.27 0.32
 5 -1 -2 1.12 0.12
 5 -1 -2 1.16 0.17
 5 -1 -2 1.45 0.33
 5 -1 -2 1.3 0.31
 5 -1 -2 1.36 0.35
 5 -1 -2 1.29 0.28
 -5 1 1 77.63 1.43
 -5 1 1 77.93 1.51
 -5 1 1 77.43 1.5
 -5 1 1 75.94 1.49
 -5 1 1 79.2 1.61
 5 -1 -1 77.85 1.51
 5 -1 -1 79.2 1.61
 5 -1 -1 79.91 1.47
 5 -1 -1 77.88 1.5
 -5 1 0 40.98 1
 -5 1 0 40.54 0.91
 -5 1 0 41.25 1.02
 -5 1 0 41.99 1.02
 -5 1 0 41.81 1.09
 5 -1 0 42.66 0.98
 5 -1 0 42.85 1.02
 5 -1 0 41.87 1.01
 5 -1 0 42.19 0.99
 5 -1 0 42.46 1.11
 -5 1 -1 110.91 2.06
 -5 1 -1 108.7 2.04
 -5 1 -1 111.05 2.02
 -5 1 -1 112.81 2.49
 -5 1 -1 113.08 2.01
 5 -1 1 112.19 2
 5 -1 1 110.67 2.04
 5 -1 1 111.93 1.96
 5 -1 1 113.43 2.5
 5 -1 1 110.29 2.05
 -5 1 -2 13.14 0.61
 -5 1 -2 12.92 0.43
 -5 1 -2 13.34 0.65
 -5 1 -2 13.28 0.69
 -5 1 -2 12.99 0.47
 -5 1 -2 13.26 0.65
 -5 1 -2 13.24 0.8
 5 -1 2 13.03 0.6
 5 -1 2 12.48 0.6
 5 -1 2 13.46 0.68
 5 -1 2 12.72 0.68
 5 -1 2 12.37 0.53
 -5 1 -3 233.31 3.83
 -5 1 -3 233.86 3.85
 -5 1 -3 228.36 3.96
 -5 1 -3 231.83 4.97
 -5 1 -3 228.3 3.71
 -5 1 -3 227.95 3.94
 5 -1 3 230.01 3.96
 5 -1 3 232.06 3.84
 5 -1 3 225.35 3.95
 5 -1 3 235.23 3.86
 5 -1 3 235.69 3.82
 5 -1 3 230.59 3.82
 -5 1 -4 22.37 0.63
 -5 1 -4 23.62 0.89
 -5 1 -4 22.86 1.2
 -5 1 -4 24.63 0.96
 -5 1 -4 21.33 0.9
 5 -1 4 21.56 0.67
 5 -1 4 24.61 0.93
 5 -1 4 23.54 0.96
 5 -1 4 24.1 0.89
 5 -1 4 23.36 0.93
 5 -1 4 22.83 0.87
 -5 1 -5 9.46 0.84
 -5 1 -5 10.19 0.81
 -5 1 -5 7.34 0.48
 -5 1 -5 8.07 0.78
 -5 1 -5 7.01 0.99
 -5 1 -5 7.01 0.77
 -5 1 -5 7.32 0.78
 5 -1 5 6.79 0.73
 5 -1 5 7.91 0.75
 5 -1 5 8.85 0.82
 5 -1 5 8.06 0.71
 5 -1 5 7.45 0.81
 -5 1 -6 0.27 0.57
 -5 1 -6 -0.69 0.49
 -5 1 -6 0.26 0.56
 -5 1 -6 -0.2 0.55
 -5 1 -6 0.61 0.34
 -5 1 -6 1.13 0.5
 -5 1 -6 -0.25 0.46
 5 -1 6 -0.81 0.39
 5 -1 6 0.29 0.58
 5 -1 6 1 0.46
 5 -1 6 -0.4 0.55
 5 -1 6 1 0.5
 -5 1 -7 15.59 1.36
 -5 1 -7 13.58 0.72
 -5 1 -7 14.63 1
 -5 1 -7 13.73 1.18
 -5 1 -7 12.4 1.12
 5 -1 7 14.34 1.15
 5 -1 7 16.11 1.02
 5 -1 7 12.27 1.25
 5 -1 7 13.04 1.3
 5 -1 7 13.94 0.96
 -5 1 -8 6.9 0.96
 -5 1 -8 6.61 1.14
 -5 1 -8 6.62 0.89
 -5 1 -8 6.98 0.8
 5 -1 8 4.99 1.03
 5 -1 8 6.62 0.9
 5 -1 8 7.22 1.21
 -4 1 9 0.17 1.02
 -4 1 9 -1.1 1.08
 4 -1 -9 0.17 1.06
 4 -1 -9 -2.09 1.21
 4 -1 -9 1.13 1.07
 4 -1 -9 -0.29 0.91
 4 -1 -9 2.34 0.99
 -4 1 8 0.45 0.62
 -4 1 8 1.07 0.8
 -4 1 8 -0.31 0.75
 -4 1 8 -0.49 0.76
 4 -1 -8 0.45 0.73
 4 -1 -8 1.28 0.73
 4 -1 -8 1.04 0.7
 4 -1 -8 0.92 0.74
 4 -1 -8 0.38 0.93
 4 -1 -8 1.17 0.45
 4 -1 -8 1.46 0.61
 -4 1 7 1.08 0.63
 -4 1 7 1.75 0.56
 -4 1 7 1.12 0.61
 -4 1 7 1.09 0.61
 4 -1 -7 1.54 0.56
 4 -1 -7 0.79 0.6
 4 -1 -7 1.3 0.49
 4 -1 -7 0.98 0.74
 4 -1 -7 1.46 0.56
 -4 1 6 8.13 0.87
 -4 1 6 7.99 0.78
 -4 1 6 8.02 0.86
 4 -1 -6 6.78 0.71
 4 -1 -6 7.38 0.73
 4 -1 -6 6.57 0.76
 4 -1 -6 8.26 1.11
 4 -1 -6 7.29 0.84
 -4 1 5 6.13 0.67
 -4 1 5 5.21 0.7
 -4 1 5 5.5 0.63
 4 -1 -5 4.71 0.6
 4 -1 -5 6.71 0.66
 4 -1 -5 5.72 0.56
 4 -1 -5 5.66 0.58
 4 -1 -5 4.36 0.56
 -4 1 4 15.16 0.7
 -4 1 4 15.78 0.64
 -4 1 4 16.73 0.77
 4 -1 -4 15.7 0.74
 4 -1 -4 15.94 0.71
 4 -1 -4 16.34 0.8
 -4 1 3 46.74 1.11
 -4 1 3 47.02 1
 -4 1 3 48.28 1.18
 4 -1 -3 47.6 1.19
 4 -1 -3 46.61 1.09
 4 -1 -3 46.58 0.89
 4 -1 -3 47.77 1.07
 -4 1 2 124.36 2.15
 -4 1 2 126.06 2.17
 -4 1 2 123.43 2.08
 4 -1 -2 121.32 2.18
 4 -1 -2 123.39 2.16
 4 -1 -2 127.54 2.09
 -4 1 1 30.37 0.77
 -4 1 1 28.98 0.76
 -4 1 1 28.35 0.69
 4 -1 -1 29.14 0.76
 4 -1 -1 29.75 0.7
 4 -1 -1 28.44 0.74
 4 -1 -1 28.79 0.75
 4 -1 -1 31.28 0.74
 -4 1 0 6.2 0.41
 -4 1 0 6.94 0.47
 -4 1 0 6.04 0.5
 -4 1 0 6.56 0.47
 -4 1 0 6.27 0.5
 4 -1 0 5.84 0.48
 4 -1 0 7.67 0.49
 4 -1 0 6.5 0.5
 4 -1 0 6.73 0.52
 -4 1 -1 55.31 1.42
 -4 1 -1 53.63 1.16
 -4 1 -1 56.22 1.18
 -4 1 -1 56.16 1.14
 -4 1 -1 53.41 1.12
 4 -1 1 55.09 1.05
 4 -1 1 55.48 1.13
 4 -1 1 54.43 1.16
 4 -1 1 53.96 1.18
 4 -1 1 54.72 1.42
 4 -1 1 54.28 1.12
 -4 1 -2 38.97 0.94
 -4 1 -2 40.01 0.79
 -4 1 -2 40.33 0.94
 -4 1 -2 38.81 1.03
 -4 1 -2 38.16 1.24
 -4 1 -2 39.67 0.8
 -4 1 -2 40.19 1.03
 4 -1 2 39.17 0.94
 4 -1 2 38.88 1
 4 -1 2 40.16 0.9
 4 -1 2 40.93 1.03
 4 -1 2 38.41 0.93
 -4 1 -3 14.98 0.63
 -4 1 -3 16.14 0.71
 -4 1 -3 16.29 0.73
 -4 1 -3 15.81 0.63
 -4 1 -3 14.73 0.46
 -4 1 -3 15.57 0.7
 -4 1 -3 17.2 0.99
 4 -1 3 16.38 0.53
 4 -1 3 15.04 0.7
 4 -1 3 15.67 0.65
 4 -1 3 15.42 0.63
 4 -1 3 14.95 0.69
 4 -1 3 14.25 0.69
 -4 1 -4 30.37 0.94
 -4 1 -4 28.3 0.98
 -4 1 -4 31.33 1.38
 -4 1 -4 28.23 1.04
 -4 1 -4 30.7 0.96
 4 -1 4 29.16 1
 4 -1 4 29.97 0.93
 4 -1 4 29.33 0.96
 4 -1 4 30.13 0.68
 4 -1 4 27.37 0.98
 4 -1 4 30.27 0.99
 4 -1 4 28.67 0.73
 -4 1 -5 -0.05 0.39
 -4 1 -5 0.74 0.44
 -4 1 -5 0.65 0.4
 -4 1 -5 0.62 0.38
 -4 1 -5 0.45 0.42
 -4 1 -5 -0.04 0.49
 4 -1 5 0.32 0.4
 4 -1 5 0.5 0.39
 4 -1 5 0.93 0.39
 4 -1 5 0.65 0.29
 4 -1 5 0.92 0.42
 4 -1 5 0.46 0.41
 -4 1 -6 1.1 0.51
 -4 1 -6 0.65 0.48
 -4 1 -6 0.63 0.48
 -4 1 -6 0.84 0.58
 -4 1 -6 0.29 0.57
 4 -1 6 0.53 0.53
 4 -1 6 0.51 0.37
 4 -1 6 0.73 0.47
 4 -1 6 0.58 0.53
 4 -1 6 0.84 0.46
 4 -1 6 0.09 0.43
 -4 1 -7 6.04 0.73
 -4 1 -7 5.22 0.86
 -4 1 -7 3.17 0.79
 -4 1 -7 5.03 0.7
 -4 1 -7 6.33 0.78
 4 -1 7 5.76 0.85
 4 -1 7 4.79 0.79
 4 -1 7 5.6 0.75
 4 -1 7 5.97 0.61
 4 -1 7 4.36 0.72
 -4 1 -8 10.82 1.36
 -4 1 -8 7.98 1.09
 -4 1 -8 6.38 0.89
 -4 1 -8 6.87 0.85
 4 -1 8 8.68 1.09
 4 -1 8 7.27 0.96
 4 -1 8 7.95 1.1
 4 -1 8 7.35 0.86
 4 -1 8 7.16 0.77
 -3 1 9 0.41 1.02
 -3 1 9 -1.75 0.86
 3 -1 -9 -0.9 0.96
 3 -1 -9 0.52 0.98
 3 -1 -9 -0.54 0.89
 3 -1 -9 -2.68 1.21
 -3 1 8 4.84 0.83
 -3 1 8 6.69 0.89
 -3 1 8 3.9 0.83
 -3 1 8 6.41 0.81
 3 -1 -8 6.03 0.91
 3 -1 -8 5.67 0.82
 3 -1 -8 6.31 0.83
 3 -1 -8 3.67 1.01
 3 -1 -8 4.58 0.86
 -3 1 7 6.33 0.77
 -3 1 7 7.19 0.97
 -3 1 7 7.15 0.86
 -3 1 7 7.07 0.76
 3 -1 -7 5.96 0.9
 3 -1 -7 6.73 0.82
 3 -1 -7 8.2 0.84
 3 -1 -7 6.61 0.6
 3 -1 -7 6.52 0.73
 3 -1 -7 8.56 0.85
 -3 1 6 0.99 0.47
 -3 1 6 0.09 0.44
 -3 1 6 0.52 0.42
 -3 1 6 0.17 0.41
 3 -1 -6 -0.36 0.39
 3 -1 -6 0.82 0.44
 3 -1 -6 0.26 0.42
 3 -1 -6 0.54 0.61
 3 -1 -6 0.5 0.41
 -3 1 5 13.61 0.79
 -3 1 5 14.91 0.77
 -3 1 5 13.59 0.78
 3 -1 -5 13.66 0.77
 3 -1 -5 14.07 0.79
 3 -1 -5 15.37 1.02
 3 -1 -5 14.85 0.67
 -3 1 4 67.07 1.56
 -3 1 4 67.37 1.48
 -3 1 4 66.7 1.54
 3 -1 -4 66.09 1.48
 3 -1 -4 67.92 1.32
 3 -1 -4 67.91 1.57
 -3 1 3 13.33 0.5
 -3 1 3 13.72 0.69
 -3 1 3 13.02 0.57
 3 -1 -3 12.14 0.63
 3 -1 -3 12.46 0.6
 3 -1 -3 12.03 0.49
 -3 1 2 29.4 0.45
 -3 1 2 29.18 0.67
 -3 1 2 28.79 0.78
 -3 1 2 28.27 0.75
 3 -1 -2 28.25 0.78
 3 -1 -2 28.55 0.7
 3 -1 -2 29.13 0.76
 -3 1 1 16.64 0.53
 -3 1 1 16.23 0.49
 -3 1 1 16.58 0.52
 3 -1 -1 16.41 0.46
 3 -1 -1 16.89 0.55
 3 -1 -1 16.03 0.51
 3 -1 -1 16.77 0.47
 3 -1 -1 16.33 0.53
 -3 1 0 278.39 4.16
 -3 1 0 274.83 5.22
 -3 1 0 275.6 4.24
 -3 1 0 275.08 4.2
 -3 1 0 277.82 4.25
 3 -1 0 269.48 4.25
 3 -1 0 274.54 4.15
 3 -1 0 272.69 5.22
 3 -1 0 269.75 4.23
 -3 1 -1 15.3 0.53
 -3 1 -1 15.37 0.43
 -3 1 -1 14.16 0.55
 -3 1 -1 15.06 0.6
 -3 1 -1 15.37 0.52
 -3 1 -1 16.33 0.73
 3 -1 1 14.46 0.56
 3 -1 1 15.55 0.59
 3 -1 1 14.7 0.51
 3 -1 1 16.49 0.76
 3 -1 1 15.28 0.53
 3 -1 1 14.94 0.42
 -3 1 -2 76.14 1.43
 -3 1 -2 74.68 1.28
 -3 1 -2 74.76 1.39
 -3 1 -2 77.19 1.33
 -3 1 -2 75.27 1.4
 -3 1 -2 75.04 1.49
 -3 1 -2 75.29 1.87
 -3 1 -2 74.2 1.48
 3 -1 2 75.36 1.4
 3 -1 2 74.83 1.49
 3 -1 2 74.75 1.4
 3 -1 2 73.81 1.49
 3 -1 2 75.88 1.43
 -3 1 -3 16.56 0.73
 -3 1 -3 16.45 0.62
 -3 1 -3 17.17 0.93
 -3 1 -3 16.78 0.66
 -3 1 -3 18.53 0.77
 3 -1 3 18.04 0.67
 3 -1 3 16.39 0.51
 3 -1 3 16.31 0.46
 3 -1 3 17.32 0.74
 3 -1 3 16.49 0.62
 3 -1 3 16.55 0.69
 3 -1 3 16.77 0.66
 -3 1 -4 6.96 0.58
 -3 1 -4 7.48 0.58
 -3 1 -4 8.28 0.61
 -3 1 -4 8.21 0.66
 -3 1 -4 7.81 0.6
 -3 1 -4 8.07 0.91
 3 -1 4 6.91 0.58
 3 -1 4 8.32 0.62
 3 -1 4 7.42 0.62
 3 -1 4 7.19 0.56
 3 -1 4 7.58 0.6
 3 -1 4 7.8 0.46
 -3 1 -5 3.36 0.45
 -3 1 -5 4.08 0.53
 -3 1 -5 4.98 0.6
 -3 1 -5 4.96 0.56
 -3 1 -5 4.32 0.66
 -3 1 -5 3.61 0.48
 3 -1 5 3.75 0.52
 3 -1 5 4.34 0.52
 3 -1 5 3.61 0.51
 3 -1 5 3.86 0.48
 3 -1 5 4.39 0.51
 3 -1 5 4.03 0.51
 -3 1 -6 17.79 1.05
 -3 1 -6 17.05 0.93
 -3 1 -6 15.47 1.3
 -3 1 -6 15.67 0.92
 -3 1 -6 16.28 0.96
 3 -1 6 16.41 0.82
 3 -1 6 17.02 1
 3 -1 6 13.83 0.98
 3 -1 6 16.73 0.98
 3 -1 6 16.84 0.95
 3 -1 6 17.89 1
 -3 1 -7 4.22 0.62
 -3 1 -7 3.59 0.75
 -3 1 -7 3.07 0.83
 -3 1 -7 3.87 0.66
 -3 1 -7 3.95 0.62
 3 -1 7 5.34 0.63
 3 -1 7 2.76 0.72
 3 -1 7 6.39 0.79
 3 -1 7 4.77 0.73
 3 -1 7 5.52 0.73
 -3 1 -8 0.69 0.9
 -3 1 -8 1.29 0.69
 -3 1 -8 -0.32 0.65
 3 -1 8 0.56 0.71
 3 -1 8 -0.05 0.68
 3 -1 8 0.69 0.66
 3 -1 8 -0.34 0.85
 3 -1 8 -0.06 0.79
 -2 1 9 7.2 1.14
 -2 1 9 7.66 1.28
 -2 1 9 11.61 1.38
 2 -1 -9 5.44 1.52
 2 -1 -9 8.73 1.07
 2 -1 -9 7.83 1.05
 2 -1 -9 8.94 1.13
 -2 1 8 -0.58 0.63
 -2 1 8 -0.62 0.55
 -2 1 8 0.4 0.74
 2 -1 -8 -0.22 0.9
 2 -1 -8 0.84 0.72
 2 -1 -8 0.1 0.67
 2 -1 -8 -0.74 0.57
 2 -1 -8 -0.01 0.6
 -2 1 7 -0.01 0.49
 -2 1 7 -0.72 0.47
 -2 1 7 0.12 0.52
 -2 1 7 -0.36 0.5
 2 -1 -7 0.6 0.74
 2 -1 -7 0.17 0.49
 2 -1 -7 0.39 0.22
 2 -1 -7 -0.74 0.48
 2 -1 -7 0.7 0.54
 2 -1 -7 1.65 0.51
 -2 1 6 4.52 0.56
 -2 1 6 6.48 0.77
 -2 1 6 4.7 0.57
 -2 1 6 3.59 0.54
 2 -1 -6 6.08 0.67
 2 -1 -6 4.24 0.59
 2 -1 -6 3.85 0.48
 2 -1 -6 3.66 0.53
 2 -1 -6 4.66 0.75
 -2 1 5 6.8 0.61
 -2 1 5 6.2 0.7
 -2 1 5 7.65 0.67
 -2 1 5 6.77 0.64
 2 -1 -5 6.84 0.65
 2 -1 -5 6.36 0.66
 2 -1 -5 7.4 0.71
 2 -1 -5 7.24 0.57
 2 -1 -5 7.74 0.94
 -2 1 4 1.54 0.33
 -2 1 4 2.35 0.43
 -2 1 4 2.14 0.38
 2 -1 -4 1.16 0.38
 2 -1 -4 1.94 0.38
 2 -1 -4 1.65 0.29
 -2 1 3 66.59 1.37
 -2 1 3 67.31 1.45
 2 -1 -3 67.72 1.44
 2 -1 -3 68.9 1.23
 2 -1 -3 67.2 1.38
 -2 1 2 32.09 0.8
 -2 1 2 29.47 0.77
 -2 1 2 29.72 0.66
 2 -1 -2 30.06 0.65
 2 -1 -2 32.7 0.83
 2 -1 -2 30.08 0.77
 -2 1 1 7.76 0.35
 -2 1 1 8.22 0.37
 2 -1 -1 7.68 0.33
 2 -1 -1 8.63 0.4
 2 -1 -1 8.47 0.39
 -2 1 0 238.43 4.48
 -2 1 0 235.43 3.58
 -2 1 0 237.72 3.63
 -2 1 0 240.58 3.63
 -2 1 0 239.33 3.54
 2 -1 0 236.38 3.53
 2 -1 0 234.21 4.48
 2 -1 0 229.41 3.62
 2 -1 0 236.58 3.62
 2 -1 0 241.79 3.63
 -2 1 -1 150.89 2.4
 -2 1 -1 145.64 2.99
 -2 1 -1 147.33 2.38
 -2 1 -1 144.51 2.29
 -2 1 -1 149.25 2.31
 -2 1 -1 148.9 2.39
 -2 1 -1 149.52 2.33
 2 -1 1 145.42 2.33
 2 -1 1 151.25 3
 2 -1 1 143.91 2.38
 2 -1 1 146.46 2.3
 2 -1 1 149.74 2.39
 2 -1 1 147.4 2.35
 -2 1 -2 4.72 0.68
 -2 1 -2 3.96 0.38
 -2 1 -2 4.07 0.39
 -2 1 -2 2.82 0.35
 -2 1 -2 3.34 0.31
 2 -1 2 3.64 0.39
 2 -1 2 3.66 0.4
 2 -1 2 3.7 0.43
 2 -1 2 3.84 0.38
 2 -1 2 3.46 0.36
 2 -1 2 3.5 0.31
 -2 1 -3 0.32 0.42
 -2 1 -3 -0.06 0.25
 -2 1 -3 0.11 0.33
 -2 1 -3 -0.09 0.25
 -2 1 -3 -0.29 0.24
 -2 1 -3 -0.04 0.3
 2 -1 3 0.19 0.31
 2 -1 3 -0.08 0.29
 2 -1 3 0.22 0.25
 2 -1 3 0.19 0.28
 2 -1 3 -0.05 0.28
 2 -1 3 0.16 0.21
 -2 1 -4 30.12 0.95
 -2 1 -4 32.15 1.32
 -2 1 -4 29.34 0.92
 -2 1 -4 29.61 0.89
 -2 1 -4 29.4 0.94
 -2 1 -4 31.19 1.01
 2 -1 4 28.97 0.92
 2 -1 4 28.99 0.93
 2 -1 4 30.51 0.96
 2 -1 4 28.86 0.93
 2 -1 4 29.36 0.88
 2 -1 4 29.79 0.83
 -2 1 -5 6.44 0.62
 -2 1 -5 8.15 0.97
 -2 1 -5 7.23 0.64
 -2 1 -5 7.32 0.72
 -2 1 -5 7.01 0.7
 2 -1 5 7.18 0.68
 2 -1 5 7.4 0.68
 2 -1 5 7.49 0.63
 2 -1 5 7.14 0.61
 2 -1 5 7.04 0.67
 2 -1 5 8.27 0.64
 -2 1 -6 0.17 0.42
 -2 1 -6 -0.07 0.55
 -2 1 -6 0.57 0.47
 -2 1 -6 0.44 0.47
 -2 1 -6 0.2 0.42
 2 -1 6 0.4 0.5
 2 -1 6 0.5 0.42
 2 -1 6 0.87 0.43
 2 -1 6 0.03 0.43
 2 -1 6 1.06 0.47
 -2 1 -7 0.6 0.61
 -2 1 -7 0.13 0.72
 -2 1 -7 -0.37 0.45
 -2 1 -7 -0.34 0.49
 2 -1 7 0.52 0.62
 2 -1 7 0.74 0.49
 2 -1 7 -0.55 0.53
 2 -1 7 -0.04 0.55
 2 -1 7 -0.22 0.57
 -2 1 -8 -0.36 0.77
 -2 1 -8 2.67 0.7
 -2 1 -8 1.67 0.78
 -2 1 -8 2 0.86
 -2 1 -8 0.55 0.71
 2 -1 8 1.96 0.69
 2 -1 8 1.26 0.78
 2 -1 8 2.72 0.72
 2 -1 8 1.19 0.86
 2 -1 8 0.81 0.78
 -2 1 -9 2.08 1.08
 2 -1 9 1.73 0.97
 2 -1 9 2.22 1.14
 2 -1 9 0.25 1.02
 -1 1 9 0.23 1.15
 -1 1 9 0.04 0.92
 1 -1 -9 -1.32 1.32
 1 -1 -9 -1.16 0.91
 1 -1 -9 0.43 0.88
 1 -1 -9 -1.5 0.93
 -1 1 8 0.31 0.61
 -1 1 8 -0.64 0.54
 -1 1 8 -0.21 0.83
 1 -1 -8 -0.79 0.88
 1 -1 -8 -0.6 0.63
 1 -1 -8 -0.56 0.64
 1 -1 -8 -0.57 0.71
 1 -1 -8 -0.15 0.58
 -1 1 7 0.18 0.48
 -1 1 7 -0.09 0.57
 -1 1 7 -0.19 0.48
 1 -1 -7 0.37 0.49
 1 -1 -7 -0.53 0.5
 1 -1 -7 -0.31 0.5
 1 -1 -7 0.27 0.49
 1 -1 -7 -0.24 0.69
 -1 1 6 14.78 0.89
 -1 1 6 16.72 0.9
 -1 1 6 15.69 0.91
 1 -1 -6 15.56 0.8
 1 -1 -6 16.13 0.91
 1 -1 -6 15.75 0.92
 1 -1 -6 16.88 1.25
 1 -1 -6 16.14 0.91
 -1 1 5 50.08 1.3
 -1 1 5 49.79 0.87
 -1 1 5 50.39 1.38
 -1 1 5 50.28 1.33
 -1 1 5 49.52 1.29
 1 -1 -5 50.05 1.34
 1 -1 -5 49.67 1.36
 1 -1 -5 49.94 1.7
 1 -1 -5 50.47 1.16
 1 -1 -5 49.83 1.34
 -1 1 4 0.49 0.34
 -1 1 4 -0.11 0.11
 -1 1 4 0.24 0.32
 -1 1 4 0.18 0.27
 -1 1 4 0.39 0.33
 1 -1 -4 -0.07 0.33
 1 -1 -4 0.33 0.26
 1 -1 -4 -0.13 0.32
 1 -1 -4 0.34 0.32
 -1 1 3 6.73 0.2
 -1 1 3 7.32 0.57
 -1 1 3 7.25 0.46
 -1 1 3 7.18 0.53
 1 -1 -3 7.52 0.57
 1 -1 -3 7.06 0.53
 1 -1 -3 7.06 0.42
 -1 1 2 227.12 3.63
 -1 1 2 232.52 3.59
 1 -1 -2 220.99 3.57
 1 -1 -2 223.25 3.62
 1 -1 -2 230.27 3.33
 -1 1 1 443.69 6.92
 -1 1 1 453.16 6.49
 -1 1 1 440.14 6.91
 1 -1 -1 438.6 6.92
 1 -1 -1 453.81 6.93
 1 -1 -1 448.02 6.43
 -1 1 -1 1.74 0.22
 -1 1 -1 1.88 0.23
 -1 1 -1 2.19 0.29
 -1 1 -1 2.13 0.23
 -1 1 -1 2.06 0.24
 -1 1 -1 2.54 0.22
 -1 1 -1 2.01 0.2
 1 -1 1 2.09 0.21
 1 -1 1 2.02 0.23
 1 -1 1 1.7 0.22
 1 -1 1 2.02 0.2
 1 -1 1 3.27 0.42
 -1 1 -2 1.48 0.38
 -1 1 -2 1.36 0.31
 -1 1 -2 1.87 0.27
 -1 1 -2 1.25 0.27
 -1 1 -2 2.66 0.37
 -1 1 -2 1.12 0.3
 1 -1 2 1.66 0.3
 1 -1 2 1.6 0.29
 1 -1 2 1.48 0.22
 1 -1 2 1.52 0.3
 -1 1 -3 60.04 1.33
 -1 1 -3 62.14 1.33
 -1 1 -3 60.31 1.29
 -1 1 -3 58.64 1.29
 -1 1 -3 64.77 1.73
 1 -1 3 61.21 1.29
 1 -1 3 61.37 1.32
 1 -1 3 61.66 1.23
 1 -1 3 58.93 1.28
 -1 1 -4 22.57 0.78
 -1 1 -4 22.29 0.85
 -1 1 -4 22.4 0.81
 -1 1 -4 23.07 1.09
 -1 1 -4 23.47 0.85
 1 -1 4 22.04 0.8
 1 -1 4 23.76 0.87
 1 -1 4 21.3 0.8
 1 -1 4 21.03 0.75
 -1 1 -5 0.2 0.34
 -1 1 -5 0.58 0.4
 -1 1 -5 0.19 0.39
 -1 1 -5 0.43 0.34
 -1 1 -5 0.22 0.46
 1 -1 5 0.46 0.36
 1 -1 5 0.16 0.35
 1 -1 5 -0.35 0.31
 -1 1 -6 1.98 0.64
 -1 1 -6 2.21 0.51
 -1 1 -6 1.8 0.52
 -1 1 -6 2.18 0.52
 -1 1 -6 2.26 0.48
 1 -1 6 2.31 0.51
 1 -1 6 1.93 0.48
 1 -1 6 2.17 0.51
 1 -1 6 1.8 0.49
 1 -1 6 2.73 0.53
 -1 1 -7 -0.9 0.48
 -1 1 -7 -0.99 0.64
 -1 1 -7 -0.51 0.53
 -1 1 -7 0.33 0.55
 -1 1 -7 -0.16 0.52
 1 -1 7 0.56 0.53
 1 -1 7 -0.41 0.54
 1 -1 7 -0.56 0.47
 1 -1 7 -0.39 0.58
 1 -1 7 0.01 0.44
 -1 1 -8 4.49 0.87
 -1 1 -8 5.38 0.8
 -1 1 -8 4.69 0.83
 -1 1 -8 4.19 0.78
 -1 1 -8 1.57 0.93
 1 -1 8 5.55 0.81
 1 -1 8 2.19 0.83
 1 -1 8 6.4 0.81
 1 -1 8 5.17 0.91
 1 -1 8 4.19 0.5
 1 -1 8 3.43 0.83
 -1 1 -9 1.4 1.05
 -1 1 -9 -0.14 1.34
 1 -1 9 0.09 1
 1 -1 9 0.99 1.04
 1 -1 9 1.78 1.13
 0 1 9 -2.19 0.97
 0 1 9 1.35 1.12
 0 1 9 -0.55 0.94
 0 -1 -9 -2.7 1.26
 0 -1 -9 -0.27 0.92
 0 -1 -9 -0.51 0.93
 0 -1 -9 1.04 1.02
 0 1 8 -0.58 0.68
 0 1 8 1.05 0.57
 0 1 8 0.34 0.6
 0 1 8 -0.93 0.79
 0 -1 -8 0.9 0.64
 0 -1 -8 -1.55 0.79
 0 -1 -8 0.61 0.67
 0 -1 -8 -0.05 0.62
 0 -1 -8 -0.91 0.67
 0 1 7 14.72 0.53
 0 1 7 15.52 1.08
 0 1 7 11.54 0.92
 0 1 7 15.23 1.1
 0 -1 -7 15.79 1.05
 0 -1 -7 16.17 1.02
 0 -1 -7 15.88 0.98
 0 -1 -7 12.93 1.46
 0 -1 -7 13.95 0.94
 0 1 6 1.57 0.51
 0 1 6 1.82 0.5
 0 1 6 1.25 0.43
 0 1 6 1.16 0.26
 0 -1 -6 2.24 0.52
 0 -1 -6 1.77 0.43
 0 -1 -6 1.16 0.45
 0 -1 -6 1.26 0.56
 0 -1 -6 1.59 0.47
 0 1 5 0.04 0.34
 0 1 5 0.08 0.37
 0 1 5 -0.32 0.32
 0 -1 -5 0.12 0.37
 0 -1 -5 0.51 0.45
 0 -1 -5 -0.15 0.36
 0 -1 -5 0.05 0.38
 0 -1 -5 0.16 0.31
 0 1 4 1 0.37
 0 1 4 1.65 0.38
 0 1 4 1.29 0.35
 0 1 4 1.37 0.29
 0 -1 -4 1.55 0.37
 0 -1 -4 1.22 0.36
 0 -1 -4 1.2 0.46
 0 -1 -4 1.84 0.4
 0 1 3 1.6 0.35
 0 1 3 1.44 0.32
 0 1 3 1.39 0.3
 0 1 3 1.19 0.25
 0 -1 -3 1.25 0.32
 0 -1 -3 1.58 0.34
 0 -1 -3 1.91 0.36
 0 1 2 270.92 4.24
 0 1 2 267.86 4.21
 0 1 2 269.67 4.63
 0 1 2 266.13 4.19
 0 -1 -2 268.86 4.21
 0 -1 -2 275.33 4.24
 0 -1 -2 273.12 4.63
 0 -1 -2 267.04 4.2
 0 1 1 4.04 0.2
 0 1 1 3.59 0.26
 0 1 1 4.15 0.26
 0 1 1 3.81 0.3
 0 -1 -1 3.97 0.26
 0 -1 -1 4.05 0.29
 0 -1 -1 4.01 0.29
 0 1 -1 3.64 0.27
 0 1 -1 4.23 0.28
 0 1 -1 4.14 0.27
 0 1 -1 4.03 0.25
 0 1 -1 4.59 0.39
 0 -1 1 4.25 0.29
 0 -1 1 4.09 0.26
 0 -1 1 4.51 0.38
 0 -1 1 3.64 0.26
 0 -1 1 4.16 0.3
 0 1 -2 264.68 4.19
 0 1 -2 267.49 4.7
 0 1 -2 269.97 5.29
 0 1 -2 276.34 4.21
 0 1 -2 269.71 4.25
 0 -1 2 270.08 4.2
 0 -1 2 270.04 4.2
 0 -1 2 271.47 4.71
 0 -1 2 267.51 4.16
 0 -1 2 274.92 4.26
 0 1 -3 1.46 0.38
 0 1 -3 1.63 0.35
 0 1 -3 1.39 0.32
 0 1 -3 1.34 0.31
 0 1 -3 1.11 0.27
 0 -1 3 1.72 0.34
 0 -1 3 1.6 0.33
 0 -1 3 1.54 0.3
 0 -1 3 0.61 0.26
 0 1 -4 1.38 0.35
 0 1 -4 1.29 0.46
 0 1 -4 1.23 0.37
 0 1 -4 1.49 0.36
 0 1 -4 1.24 0.33
 0 -1 4 1.6 0.39
 0 -1 4 1.4 0.37
 0 -1 4 1.65 0.33
 0 1 -5 0.02 0.46
 0 1 -5 -0.17 0.35
 0 1 -5 0.05 0.35
 0 1 -5 0.07 0.34
 0 1 -5 0.14 0.37
 0 -1 5 0.69 0.38
 0 -1 5 0.29 0.39
 0 -1 5 -0.05 0.34
 0 1 -6 1.83 0.46
 0 1 -6 0.56 0.48
 0 1 -6 1.31 0.61
 0 1 -6 1.19 0.44
 0 1 -6 1.98 0.47
 0 -1 6 0.73 0.47
 0 -1 6 1.79 0.51
 0 -1 6 1.54 0.48
 0 1 -7 14.73 1
 0 1 -7 15.7 1.09
 0 1 -7 17.07 1.08
 0 1 -7 14.82 1.02
 0 1 -7 10.85 1.41
 0 -1 7 17.74 1
 0 -1 7 14.04 0.96
 0 -1 7 16.59 1.1
 0 1 -8 -0.94 0.58
 0 1 -8 -1.36 0.85
 0 1 -8 1.09 0.76
 0 1 -8 0.02 0.62
 0 1 -8 0.02 0.7
 0 -1 8 0.02 0.58
 0 -1 8 1.25 0.63
 0 -1 8 -0.1 0.81
 0 -1 8 -0.49 0.6
 0 -1 8 -1.03 0.72
 0 1 -9 2.37 1.11
 0 1 -9 -1.63 1.22
 0 1 -9 -0.61 0.91
 0 1 -9 0.65 0.93
 0 -1 9 -0.18 0.9
 0 -1 9 0.33 1.11
 0 -1 9 -0.2 1.04
 1 1 9 1.45 1.06
 1 1 9 2.12 1.18
 1 1 9 1.99 0.98
 -1 -1 -9 -0.03 1.06
 -1 -1 -9 1.5 1
 1 1 8 5.09 0.73
 1 1 8 6.23 0.65
 1 1 8 3.63 0.8
 1 1 8 3.67 0.8
 1 1 8 4.83 0.89
 1 1 8 4.8 0.79
 -1 -1 -8 2.08 1.01
 -1 -1 -8 5.48 0.88
 -1 -1 -8 3.68 0.77
 -1 -1 -8 5.02 0.8
 -1 -1 -8 3.98 0.74
 1 1 7 -0.83 0.57
 1 1 7 -0.13 0.48
 1 1 7 -0.18 0.48
 1 1 7 -0.32 0.34
 1 1 7 0.56 0.47
 -1 -1 -7 0.1 0.52
 -1 -1 -7 -0.21 0.53
 -1 -1 -7 -0.92 0.63
 -1 -1 -7 0.18 0.5
 -1 -1 -7 -0.18 0.5
 1 1 6 1.49 0.45
 1 1 6 1.99 0.45
 1 1 6 2.12 0.53
 1 1 6 1.45 0.49
 -1 -1 -6 2.14 0.51
 -1 -1 -6 1.99 0.62
 -1 -1 -6 2.5 0.52
 -1 -1 -6 2.13 0.51
 1 1 5 -0.21 0.37
 1 1 5 0.33 0.36
 1 1 5 -0.5 0.33
 1 1 5 0.02 0.38
 -1 -1 -5 -0.16 0.38
 -1 -1 -5 -0.49 0.36
 -1 -1 -5 0.48 0.31
 -1 -1 -5 -0.22 0.35
 -1 -1 -5 0.37 0.46
 1 1 4 22.03 0.85
 1 1 4 22.08 0.79
 1 1 4 21.88 0.82
 -1 -1 -4 21.6 0.43
 -1 -1 -4 21.3 0.81
 -1 -1 -4 22.5 0.72
 -1 -1 -4 22.41 0.81
 -1 -1 -4 20.9 0.81
 1 1 3 60.5 1.3
 1 1 3 61.05 1.32
 1 1 3 59.59 1.26
 1 1 3 62.31 1.29
 -1 -1 -3 59.57 1.3
 -1 -1 -3 59.58 1.29
 -1 -1 -3 59.66 1.26
 -1 -1 -3 61.6 1.29
 -1 -1 -3 60.13 1.03
 -1 -1 -3 61.29 1.25
 1 1 2 3.26 0.4
 1 1 2 1.77 0.32
 1 1 2 1.56 0.28
 1 1 2 1.57 0.3
 1 1 2 1.75 0.31
 -1 -1 -2 1.6 0.27
 -1 -1 -2 1.76 0.16
 -1 -1 -2 1.45 0.31
 -1 -1 -2 1.66 0.21
 -1 -1 -2 1.51 0.28
 -1 -1 -2 1.48 0.3
 1 1 1 2.43 0.24
 1 1 1 1.91 0.24
 1 1 1 2.12 0.21
 1 1 1 2.46 0.23
 1 1 1 2.27 0.25
 1 1 1 2.27 0.27
 -1 -1 -1 1.57 0.21
 -1 -1 -1 2.14 0.22
 -1 -1 -1 1.54 0.21
 -1 -1 -1 2.28 0.24
 -1 -1 -1 2.38 0.27
 -1 -1 -1 2.13 0.23
 1 1 -1 456.16 6.52
 1 1 -1 449.31 6.9
 1 1 -1 441.66 6.61
 1 1 -1 446.88 8.62
 1 1 -1 444.11 6.87
 -1 -1 1 448.18 6.46
 -1 -1 1 438.01 6.75
 -1 -1 1 449.6 8.61
 -1 -1 1 448.84 6.83
 -1 -1 1 452.07 7.21
 1 1 -2 235.59 3.41
 1 1 -2 233.94 4.49
 1 1 -2 229.27 3.66
 1 1 -2 223.81 3.58
 1 1 -2 227.56 3.58
 -1 -1 2 226.79 3.58
 -1 -1 2 227.8 3.66
 -1 -1 2 227.72 4.05
 1 1 -3 7.65 0.47
 1 1 -3 7.35 0.52
 1 1 -3 8.95 0.53
 1 1 -3 7.66 0.7
 1 1 -3 7.2 0.51
 -1 -1 3 6.86 0.56
 -1 -1 3 7.17 0.52
 -1 -1 3 8.38 0.54
 1 1 -4 0.37 0.33
 1 1 -4 0.38 0.29
 1 1 -4 0.3 0.38
 1 1 -4 0.09 0.3
 1 1 -4 -0.03 0.34
 -1 -1 4 0.41 0.3
 -1 -1 4 0.32 0.3
 -1 -1 4 0.29 0.33
 -1 -1 4 0.11 0.33
 1 1 -5 50.88 1.32
 1 1 -5 51.02 1.21
 1 1 -5 51.06 1.38
 1 1 -5 50.05 1.33
 1 1 -5 48.49 0.86
 1 1 -5 50.76 1.68
 -1 -1 5 50.7 1.33
 -1 -1 5 50.45 1.26
 -1 -1 5 48.59 1.34
 -1 -1 5 49.67 1.37
 1 1 -6 15.4 0.89
 1 1 -6 15.95 1.23
 1 1 -6 12.93 0.85
 1 1 -6 14.41 0.87
 1 1 -6 15.55 0.86
 -1 -1 6 14.71 0.82
 -1 -1 6 16.75 0.89
 -1 -1 6 17.84 0.97
 1 1 -7 0.19 0.53
 1 1 -7 -0.76 0.44
 1 1 -7 -1.23 0.65
 1 1 -7 0.32 0.54
 1 1 -7 -0.14 0.53
 -1 -1 7 -0.69 0.43
 -1 -1 7 0.38 0.58
 -1 -1 7 0.04 0.49
 1 1 -8 -0.58 0.59
 1 1 -8 -0.99 0.64
 1 1 -8 -0.36 0.71
 1 1 -8 0.39 0.7
 -1 -1 8 0.09 0.78
 -1 -1 8 1.42 0.67
 -1 -1 8 1.2 0.61
 1 1 -9 -0.89 0.98
 1 1 -9 -0.05 0.92
 1 1 -9 -1.7 1.21
 -1 -1 9 -0.33 0.94
 -1 -1 9 -1 1.03
 -1 -1 9 -0.26 1.07
 -1 -1 9 0.64 0.77
 2 1 9 0.14 0.96
 2 1 9 0.53 1.08
 2 1 9 0.84 1.17
 -2 -1 -9 1.12 1.02
 -2 -1 -9 0.62 1.15
 2 1 8 1.07 0.53
 2 1 8 1.6 0.85
 2 1 8 1.25 0.82
 2 1 8 2.18 0.73
 2 1 8 1.41 0.64
 2 1 8 3.22 0.67
 -2 -1 -8 0.19 0.9
 -2 -1 -8 0.5 0.76
 -2 -1 -8 2.84 0.7
 -2 -1 -8 1.72 0.64
 -2 -1 -8 2.71 0.79
 2 1 7 -0.29 0.51
 2 1 7 -0.49 0.61
 2 1 7 -0.46 0.5
 2 1 7 0.34 0.64
 2 1 7 1.01 0.49
 -2 -1 -7 1.36 0.63
 -2 -1 -7 0.32 0.52
 -2 -1 -7 -0.53 0.51
 -2 -1 -7 -0.36 0.65
 2 1 6 0.24 0.46
 2 1 6 -0.01 0.47
 2 1 6 0.07 0.39
 2 1 6 -0.22 0.38
 2 1 6 -0.44 0.43
 -2 -1 -6 0.59 0.44
 -2 -1 -6 0.29 0.38
 -2 -1 -6 -0.09 0.56
 -2 -1 -6 -0.14 0.42
 -2 -1 -6 0.8 0.48
 2 1 5 8.84 0.71
 2 1 5 7.43 0.69
 2 1 5 7.87 0.63
 2 1 5 7.83 0.66
 -2 -1 -5 8.2 0.67
 -2 -1 -5 6.93 0.68
 -2 -1 -5 8.06 0.6
 -2 -1 -5 8.75 1.03
 -2 -1 -5 7.99 0.66
 2 1 4 29.78 0.99
 2 1 4 29.25 0.9
 2 1 4 28.59 0.91
 2 1 4 29.16 0.93
 2 1 4 29.41 0.94
 -2 -1 -4 28.3 0.94
 -2 -1 -4 29.88 0.93
 -2 -1 -4 28.42 0.95
 -2 -1 -4 29.36 0.92
 -2 -1 -4 31.62 1.33
 -2 -1 -4 29.47 0.84
 2 1 3 0.19 0.3
 2 1 3 0.36 0.28
 2 1 3 0.14 0.26
 2 1 3 0.05 0.3
 2 1 3 0.25 0.32
 -2 -1 -3 0.1 0.22
 -2 -1 -3 0.41 0.41
 -2 -1 -3 0.19 0.32
 -2 -1 -3 0.22 0.33
 -2 -1 -3 -0.03 0.27
 -2 -1 -3 0.09 0.25
 2 1 2 3.87 0.47
 2 1 2 3.52 0.43
 2 1 2 3.86 0.29
 2 1 2 3.66 0.38
 2 1 2 3.81 0.41
 2 1 2 3.5 0.23
 2 1 2 3.71 0.4
 -2 -1 -2 3.69 0.43
 -2 -1 -2 3.51 0.44
 -2 -1 -2 4.24 0.37
 -2 -1 -2 3.94 0.36
 -2 -1 -2 4.05 0.43
 2 1 1 145.54 2.36
 2 1 1 143.83 2.37
 2 1 1 148.65 2.41
 2 1 1 150.42 2.29
 2 1 1 152.3 2.38
 2 1 1 143.13 2.32
 -2 -1 -1 146.35 2.36
 -2 -1 -1 146.6 2.32
 -2 -1 -1 144.37 2.36
 -2 -1 -1 150.84 2.29
 -2 -1 -1 150.28 2.38
 2 1 0 241.21 3.6
 2 1 0 233.15 3.74
 2 1 0 232.48 3.57
 -2 -1 0 229.8 3.65
 -2 -1 0 242.36 3.59
 -2 -1 0 242.98 3.75
 -2 -1 0 234.53 3.56
 -2 -1 0 239.03 3.59
 -2 -1 0 241.46 3.65
 2 1 -1 8.42 0.39
 2 1 -1 7.62 0.44
 2 1 -1 8.06 0.33
 2 1 -1 7.78 0.39
 2 1 -1 8.68 0.34
 -2 -1 1 8.35 0.37
 -2 -1 1 8.09 0.26
 -2 -1 1 7.73 0.37
 -2 -1 1 7.67 0.32
 2 1 -2 30.02 0.78
 2 1 -2 31.39 0.86
 2 1 -2 29.6 0.7
 2 1 -2 29.93 0.72
 2 1 -2 29.41 0.73
 -2 -1 2 30.12 0.8
 -2 -1 2 30.59 0.7
 -2 -1 2 29.34 0.72
 2 1 -3 65.5 1.4
 2 1 -3 66.84 1.34
 2 1 -3 65.29 1.24
 2 1 -3 67.41 1.64
 -2 -1 3 65.83 1.25
 -2 -1 3 67.63 1.11
 -2 -1 3 66.03 1.48
 -2 -1 3 65.85 1.33
 -2 -1 3 66.01 1.42
 2 1 -4 1.98 0.33
 2 1 -4 1.99 0.35
 2 1 -4 1.59 0.34
 2 1 -4 1.86 0.43
 2 1 -4 1.46 0.38
 -2 -1 4 2.11 0.38
 -2 -1 4 1.76 0.37
 -2 -1 4 1.41 0.38
 2 1 -5 7.08 0.89
 2 1 -5 7.29 0.65
 2 1 -5 6.83 0.41
 2 1 -5 6.4 0.63
 2 1 -5 6.92 0.57
 2 1 -5 6.36 0.57
 -2 -1 5 6.41 0.69
 -2 -1 5 5.94 0.67
 -2 -1 5 7.36 0.64
 -2 -1 5 6.21 0.62
 2 1 -6 5.42 0.63
 2 1 -6 5.51 0.61
 2 1 -6 3.57 0.35
 2 1 -6 3.62 0.71
 2 1 -6 5.28 0.61
 2 1 -6 4.23 0.52
 -2 -1 6 4.21 0.58
 -2 -1 6 4.08 0.59
 -2 -1 6 4.25 0.56
 -2 -1 6 4.41 0.57
 2 1 -7 -0.67 0.53
 2 1 -7 0.36 0.57
 2 1 -7 -0.64 0.68
 2 1 -7 0.48 0.5
 2 1 -7 0.42 0.5
 -2 -1 7 0.05 0.55
 -2 -1 7 0.79 0.51
 -2 -1 7 0.4 0.58
 -2 -1 7 0.61 0.53
 2 1 -8 0.72 0.69
 2 1 -8 -1.65 0.71
 2 1 -8 -0.03 0.74
 2 1 -8 -1.42 0.84
 2 1 -8 1.08 0.6
 -2 -1 8 0.43 0.77
 -2 -1 8 -0.3 0.66
 -2 -1 8 -0.24 0.53
 2 1 -9 10.68 1.14
 2 1 -9 6.33 1.14
 2 1 -9 9.59 1.19
 2 1 -9 4.96 1.4
 -2 -1 9 6.62 0.98
 -2 -1 9 12.16 1.37
 -2 -1 9 8.05 1.3
 -2 -1 9 7.03 1.23
 3 1 8 1.02 0.68
 3 1 8 -0.18 0.62
 3 1 8 0.43 0.64
 3 1 8 1.58 0.62
 3 1 8 1.06 0.84
 3 1 8 -0.88 0.86
 -3 -1 -8 1.23 0.65
 -3 -1 -8 2.03 0.68
 -3 -1 -8 0.03 0.89
 -3 -1 -8 -1.72 0.76
 3 1 7 5.56 0.79
 3 1 7 5.35 0.68
 3 1 7 3.11 0.71
 3 1 7 4.85 0.6
 3 1 7 5.17 0.67
 -3 -1 -7 3.6 0.77
 -3 -1 -7 3.02 0.63
 -3 -1 -7 4.55 0.66
 -3 -1 -7 3.86 0.76
 3 1 6 15.5 1.01
 3 1 6 16.05 0.97
 3 1 6 16.27 0.8
 3 1 6 18.12 0.96
 3 1 6 18.19 1
 -3 -1 -6 19.01 1.02
 -3 -1 -6 16.82 0.85
 -3 -1 -6 15.45 0.96
 -3 -1 -6 14.01 1.02
 -3 -1 -6 17.56 1.34
 3 1 5 4.77 0.57
 3 1 5 4.35 0.49
 3 1 5 4.27 0.5
 3 1 5 3.53 0.51
 3 1 5 4.41 0.53
 3 1 5 3.93 0.5
 -3 -1 -5 4.37 0.56
 -3 -1 -5 3.95 0.5
 -3 -1 -5 4.64 0.58
 -3 -1 -5 3.86 0.43
 -3 -1 -5 4.67 0.7
 -3 -1 -5 3.53 0.5
 3 1 4 7.12 0.64
 3 1 4 7.42 0.6
 3 1 4 8.94 0.61
 3 1 4 8.24 0.59
 3 1 4 7.05 0.42
 3 1 4 7.46 0.65
 -3 -1 -4 7.34 0.6
 -3 -1 -4 8.44 0.6
 -3 -1 -4 7.67 0.92
 -3 -1 -4 7.91 0.53
 -3 -1 -4 7.5 0.67
 -3 -1 -4 6.93 0.58
 3 1 3 17.04 0.49
 3 1 3 17.5 0.68
 3 1 3 17.24 0.71
 3 1 3 16.48 0.7
 3 1 3 16.83 0.44
 3 1 3 17.31 0.71
 3 1 3 17.32 0.65
 -3 -1 -3 17.06 0.72
 -3 -1 -3 17.28 0.7
 -3 -1 -3 16.76 0.63
 -3 -1 -3 17.26 0.69
 3 1 2 74.71 1.36
 3 1 2 72.86 1.43
 3 1 2 75.13 1.49
 3 1 2 76.09 1.45
 3 1 2 73.42 1.35
 3 1 2 73.24 1.46
 -3 -1 -2 75.98 1.9
 -3 -1 -2 74.56 1.46
 -3 -1 -2 75.22 1.44
 -3 -1 -2 76.39 1.5
 -3 -1 -2 75.83 1.35
 -3 -1 -2 74.5 1.43
 3 1 1 15.7 0.53
 3 1 1 14.23 0.55
 3 1 1 14.64 0.54
 3 1 1 15.58 0.39
 3 1 1 15.93 0.58
 -3 -1 -1 14.38 0.52
 -3 -1 -1 15.42 0.57
 -3 -1 -1 14.58 0.53
 -3 -1 -1 14.5 0.49
 -3 -1 -1 17.62 0.77
 -3 -1 -1 15.55 0.56
 3 1 0 269.1 4.3
 3 1 0 264.48 4.13
 3 1 0 264.88 4.11
 3 1 0 276.87 4.16
 -3 -1 0 268.39 4.11
 -3 -1 0 276.37 5.12
 -3 -1 0 269.05 4.14
 -3 -1 0 266.59 4.3
 -3 -1 0 269.98 4.14
 -3 -1 0 266.52 4.19
 -3 -1 0 278.38 4.21
 3 1 -1 16.36 0.4
 3 1 -1 17.43 0.54
 3 1 -1 16.77 0.56
 3 1 -1 15.89 0.49
 3 1 -1 16.52 0.5
 -3 -1 1 16.01 0.48
 -3 -1 1 15.51 0.51
 -3 -1 1 16.64 0.5
 -3 -1 1 15.58 0.55
 3 1 -2 28.15 0.79
 3 1 -2 28.77 0.75
 3 1 -2 28.38 0.71
 3 1 -2 28.87 0.64
 3 1 -2 30.24 0.76
 -3 -1 2 28.65 0.55
 -3 -1 2 28.42 0.71
 -3 -1 2 28.21 0.72
 -3 -1 2 29.74 0.77
 3 1 -3 10.61 0.6
 3 1 -3 10.98 0.53
 3 1 -3 11.8 0.64
 3 1 -3 10.54 0.59
 3 1 -3 10.96 0.51
 -3 -1 3 10.78 0.52
 -3 -1 3 10.09 0.54
 -3 -1 3 11.2 0.59
 3 1 -4 68.42 1.57
 3 1 -4 67.38 1.44
 3 1 -4 68.61 1.37
 3 1 -4 69.83 1.78
 -3 -1 4 66.81 1.62
 -3 -1 4 65.56 1.53
 -3 -1 4 66.25 1.46
 3 1 -5 13.22 0.75
 3 1 -5 14.17 0.83
 3 1 -5 14.42 0.97
 3 1 -5 14.54 0.76
 3 1 -5 15.54 0.72
 -3 -1 5 14.25 0.76
 -3 -1 5 13.6 0.83
 -3 -1 5 14.27 0.84
 3 1 -6 -0.14 0.52
 3 1 -6 -0.44 0.41
 3 1 -6 -0.21 0.44
 3 1 -6 0.17 0.31
 3 1 -6 -0.37 0.42
 3 1 -6 -0.24 0.42
 -3 -1 6 0.91 0.48
 -3 -1 6 0.48 0.45
 -3 -1 6 0.63 0.49
 -3 -1 6 0.43 0.46
 3 1 -7 5.37 0.87
 3 1 -7 6.25 0.72
 3 1 -7 6.95 0.73
 3 1 -7 5.45 0.73
 3 1 -7 6.57 0.49
 3 1 -7 6.83 0.77
 -3 -1 7 7.67 0.89
 -3 -1 7 5.77 0.77
 -3 -1 7 8.14 0.96
 -3 -1 7 6.5 0.8
 3 1 -8 5.89 0.84
 3 1 -8 3.75 1.03
 3 1 -8 5.55 0.95
 3 1 -8 5.51 0.91
 3 1 -8 4.34 0.71
 -3 -1 8 5.38 0.89
 -3 -1 8 5.4 0.75
 -3 -1 8 5.84 0.86
 -3 -1 8 4.68 0.83
 3 1 -9 0.51 0.94
 3 1 -9 0.62 1.09
 3 1 -9 -0.6 0.86
 3 1 -9 -0.6 0.89
 3 1 -9 -1.37 1.23
 -3 -1 9 1.1 1.1
 -3 -1 9 -0.19 0.98
 4 1 8 7.16 1.03
 4 1 8 7.3 0.9
 4 1 8 7.27 1.07
 4 1 8 7.05 0.89
 4 1 8 6.78 0.72
 4 1 8 8.79 0.96
 -4 -1 -8 6.65 1.1
 -4 -1 -8 7.92 0.85
 -4 -1 -8 10.52 1.04
 4 1 7 4.74 0.67
 4 1 7 6.03 0.86
 4 1 7 4.59 0.76
 4 1 7 4.49 0.53
 4 1 7 3.62 0.62
 -4 -1 -7 7.12 0.79
 -4 -1 -7 2.99 0.79
 -4 -1 -7 5.93 0.83
 -4 -1 -7 4.51 0.66
 -4 -1 -7 4.44 0.63
 4 1 6 0.42 0.47
 4 1 6 1.09 0.47
 4 1 6 0.28 0.51
 4 1 6 1.35 0.5
 4 1 6 0.5 0.52
 4 1 6 0.78 0.35
 -4 -1 -6 0.39 0.59
 -4 -1 -6 1.53 0.47
 -4 -1 -6 -0.29 0.52
 -4 -1 -6 0 0.47
 -4 -1 -6 0.73 0.43
 -4 -1 -6 0.43 0.56
 4 1 5 0.78 0.4
 4 1 5 1.02 0.44
 4 1 5 0.34 0.42
 4 1 5 0.38 0.25
 4 1 5 0.46 0.4
 4 1 5 0.78 0.41
 -4 -1 -5 0.71 0.51
 -4 -1 -5 0.4 0.35
 -4 -1 -5 0.95 0.45
 -4 -1 -5 0.84 0.44
 -4 -1 -5 0.25 0.41
 -4 -1 -5 0.6 0.42
 4 1 4 29.37 0.94
 4 1 4 30.62 0.97
 4 1 4 29.98 1
 4 1 4 29.44 0.99
 4 1 4 28.64 0.66
 4 1 4 30.72 1.04
 -4 -1 -4 30.64 1.32
 -4 -1 -4 29.08 0.95
 -4 -1 -4 28.82 0.94
 -4 -1 -4 30.4 1
 -4 -1 -4 31.07 1.06
 4 1 3 15.6 0.54
 4 1 3 16.23 0.69
 4 1 3 14.92 0.69
 4 1 3 15.22 0.69
 4 1 3 15.34 0.62
 4 1 3 15.21 0.7
 -4 -1 -3 15.03 0.76
 -4 -1 -3 17.29 1.04
 -4 -1 -3 15.18 0.68
 -4 -1 -3 15.2 0.61
 -4 -1 -3 16 0.68
 -4 -1 -3 15.53 0.69
 4 1 2 40.55 0.97
 4 1 2 40.01 0.85
 4 1 2 40.83 0.99
 4 1 2 41.08 1.04
 4 1 2 40.16 1
 4 1 2 39.97 0.92
 -4 -1 -2 40.08 1.01
 -4 -1 -2 40.33 0.88
 -4 -1 -2 39.98 1.02
 -4 -1 -2 41.88 1.01
 -4 -1 -2 39.07 0.97
 -4 -1 -2 42.27 1.33
 4 1 1 52.64 1.12
 4 1 1 54.22 1.08
 4 1 1 55.9 0.96
 4 1 1 52.89 1.13
 4 1 1 54.2 1.15
 4 1 1 55.41 1.14
 -4 -1 -1 53.17 1.09
 -4 -1 -1 54.9 1.16
 -4 -1 -1 54.62 1.13
 -4 -1 -1 54.33 1.14
 -4 -1 -1 52.9 1.14
 4 1 0 6.35 0.47
 4 1 0 6.06 0.45
 4 1 0 6.71 0.49
 4 1 0 6.85 0.53
 -4 -1 0 7.12 0.55
 -4 -1 0 6.68 0.45
 -4 -1 0 7.14 0.45
 -4 -1 0 6.83 0.49
 -4 -1 0 5.47 0.46
 -4 -1 0 6.98 0.46
 4 1 -1 30.31 0.78
 4 1 -1 29.52 0.72
 4 1 -1 29.8 0.61
 4 1 -1 29.08 0.7
 4 1 -1 30.13 0.71
 -4 -1 1 29.43 0.77
 -4 -1 1 27.97 0.73
 -4 -1 1 29.45 0.71
 -4 -1 1 29.3 0.79
 -4 -1 1 29.67 0.72
 -4 -1 1 30.06 0.63
 4 1 -2 124.8 2.11
 4 1 -2 124.87 2.18
 4 1 -2 124.88 2.4
 4 1 -2 122.03 2.21
 4 1 -2 125.99 2.13
 -4 -1 2 124.98 2.13
 -4 -1 2 126.68 2.18
 -4 -1 2 121.94 2.05
 -4 -1 2 120.83 2.1
 -4 -1 2 124.87 1.9
 -4 -1 2 127.28 2.13
 4 1 -3 48.72 1.19
 4 1 -3 46.88 1.07
 4 1 -3 48.45 1.11
 4 1 -3 46.85 1.17
 4 1 -3 46.17 0.92
 -4 -1 3 46.84 1.14
 -4 -1 3 47.63 1.05
 -4 -1 3 47.67 1.08
 4 1 -4 16.07 0.69
 4 1 -4 16.05 0.75
 4 1 -4 16.15 0.66
 4 1 -4 16.4 0.82
 4 1 -4 15.06 0.68
 -4 -1 4 15.16 0.68
 -4 -1 4 14.44 0.78
 -4 -1 4 14.65 0.65
 -4 -1 4 15.46 0.79
 4 1 -5 4.37 0.55
 4 1 -5 5.01 0.59
 4 1 -5 5.15 0.57
 4 1 -5 4.23 0.54
 4 1 -5 5.54 0.61
 -4 -1 5 5.38 0.57
 -4 -1 5 5.79 0.62
 -4 -1 5 5.67 0.7
 4 1 -6 7.18 0.74
 4 1 -6 6.79 0.81
 4 1 -6 6.96 0.77
 4 1 -6 6.85 0.66
 4 1 -6 7.33 0.78
 4 1 -6 5.69 0.7
 4 1 -6 8.35 0.82
 -4 -1 6 6.82 0.87
 -4 -1 6 7.72 0.81
 -4 -1 6 7.28 0.76
 4 1 -7 1.25 0.61
 4 1 -7 0.92 0.39
 4 1 -7 1.42 0.6
 4 1 -7 1.41 0.53
 4 1 -7 0.01 0.69
 4 1 -7 0.17 0.58
 4 1 -7 1.8 0.56
 -4 -1 7 0.89 0.63
 -4 -1 7 1 0.64
 -4 -1 7 1.97 0.68
 -4 -1 7 1.43 0.52
 4 1 -8 0.98 0.82
 4 1 -8 0.44 0.58
 4 1 -8 1.01 0.75
 4 1 -8 0.97 0.36
 4 1 -8 0.56 0.68
 4 1 -8 0.1 0.89
 4 1 -8 1.58 0.75
 -4 -1 8 2.62 0.86
 -4 -1 8 -0.34 0.74
 -4 -1 8 1.25 0.62
 -4 -1 8 -0.1 0.75
 4 1 -9 -2.8 1.17
 4 1 -9 1.25 0.96
 4 1 -9 -0.6 0.94
 4 1 -9 -0.53 0.94
 4 1 -9 0.85 0.94
 -4 -1 9 1.63 1.07
 -4 -1 9 -0.54 1.04
 5 1 8 5.78 1.13
 5 1 8 8.63 1.14
 5 1 8 7.85 0.99
 -5 -1 -8 5.81 1.13
 -5 -1 -8 7.69 0.9
 -5 -1 -8 4.15 0.86
 5 1 7 14.01 0.96
 5 1 7 15.22 1.06
 5 1 7 12.79 1.3
 5 1 7 14.02 1.24
 -5 -1 -7 12.18 1.05
 -5 -1 -7 14.45 1.3
 -5 -1 -7 17.01 1.15
 -5 -1 -7 10.8 1.36
 -5 -1 -7 12.97 1.03
 5 1 6 -0.06 0.51
 5 1 6 0.39 0.49
 5 1 6 0.6 0.57
 5 1 6 0.18 0.48
 5 1 6 0.34 0.43
 -5 -1 -6 -0.22 0.44
 -5 -1 -6 0.14 0.54
 -5 -1 -6 0.43 0.5
 -5 -1 -6 0.18 0.56
 -5 -1 -6 0.09 0.56
 -5 -1 -6 0.58 0.48
 5 1 5 7.79 0.79
 5 1 5 8.69 0.79
 5 1 5 6.67 0.77
 5 1 5 7.18 0.72
 5 1 5 7.31 0.76
 -5 -1 -5 7.44 0.82
 -5 -1 -5 8.64 0.77
 -5 -1 -5 7.46 0.72
 -5 -1 -5 8.4 1.02
 -5 -1 -5 7.82 0.79
 -5 -1 -5 7.75 0.79
 5 1 4 22.58 0.94
 5 1 4 21.07 0.89
 5 1 4 23.08 0.85
 5 1 4 23.38 0.7
 5 1 4 23.16 0.89
 5 1 4 22.13 0.9
 -5 -1 -4 22.64 0.98
 -5 -1 -4 22.73 1.26
 -5 -1 -4 21 0.7
 -5 -1 -4 22.56 0.84
 -5 -1 -4 22.02 0.92
 -5 -1 -4 22.75 0.91
 5 1 3 237.62 4
 5 1 3 235.56 3.81
 5 1 3 228.4 3.92
 5 1 3 235.29 3.9
 5 1 3 235.99 4
 5 1 3 236.19 3.89
 -5 -1 -3 228.85 3.83
 -5 -1 -3 236.21 3.89
 -5 -1 -3 237.4 3.99
 -5 -1 -3 234.97 5.02
 -5 -1 -3 230.29 3.99
 -5 -1 -3 226.33 3.91
 5 1 2 12.97 0.48
 5 1 2 13.25 0.6
 5 1 2 13.99 0.64
 5 1 2 14.2 0.69
 5 1 2 13.05 0.65
 5 1 2 13.64 0.68
 -5 -1 -2 12.82 0.54
 -5 -1 -2 12.7 0.62
 -5 -1 -2 14.02 0.68
 -5 -1 -2 14.21 0.89
 -5 -1 -2 13.1 0.61
 -5 -1 -2 13.5 0.32
 -5 -1 -2 13.29 0.69
 5 1 1 104.92 1.94
 5 1 1 108.02 1.93
 5 1 1 106.69 1.96
 5 1 1 104.83 1.93
 5 1 1 104.62 1.95
 -5 -1 -1 108.27 1.95
 -5 -1 -1 109.51 1.97
 -5 -1 -1 102.71 1.92
 -5 -1 -1 108.28 1.98
 -5 -1 -1 107.7 2.4
 -5 -1 -1 104.92 1.95
 5 1 0 43.01 1.04
 5 1 0 41.63 0.99
 5 1 0 41.34 0.99
 5 1 0 42.01 0.97
 -5 -1 0 41.59 1.02
 -5 -1 0 42.96 0.98
 -5 -1 0 42.73 1.06
 -5 -1 0 41.83 0.98
 -5 -1 0 40.21 0.96
 -5 -1 0 40.6 1.02
 5 1 -1 77.05 1.46
 5 1 -1 78.75 1.59
 5 1 -1 77.85 1.41
 5 1 -1 81.38 1.53
 5 1 -1 78.67 1.48
 -5 -1 1 76.51 1.47
 -5 -1 1 76.76 1.51
 -5 -1 1 80.3 1.52
 -5 -1 1 78.72 1.38
 -5 -1 1 75.67 1.49
 -5 -1 1 76.78 1.46
 -5 -1 1 78.88 1.47
 5 1 -2 1.1 0.3
 5 1 -2 1.29 0.3
 5 1 -2 1.18 0.28
 5 1 -2 1.32 0.18
 5 1 -2 0.99 0.33
 -5 -1 2 1.28 0.3
 -5 -1 2 0.99 0.3
 -5 -1 2 1.16 0.27
 -5 -1 2 1.21 0.28
 5 1 -3 5.71 0.5
 5 1 -3 5.3 0.42
 5 1 -3 6.06 0.56
 5 1 -3 5.51 0.41
 5 1 -3 5.93 0.52
 5 1 -3 6.05 0.58
 -5 -1 3 5.29 0.51
 -5 -1 3 5.81 0.48
 -5 -1 3 5.73 0.28
 -5 -1 3 6.11 0.58
 5 1 -4 5.78 0.65
 5 1 -4 6.77 0.59
 5 1 -4 7.02 0.61
 5 1 -4 7.43 0.57
 -5 -1 4 6.37 0.34
 -5 -1 4 7.84 0.56
 -5 -1 4 7.09 0.55
 -5 -1 4 7.11 0.61
 5 1 -5 0.55 0.41
 5 1 -5 0.56 0.41
 5 1 -5 0.53 0.39
 5 1 -5 1.44 0.42
 -5 -1 5 0.31 0.43
 -5 -1 5 -0.26 0.35
 -5 -1 5 0.29 0.38
 -5 -1 5 0.99 0.4
 5 1 -6 5.62 0.62
 5 1 -6 5.82 0.66
 5 1 -6 4.71 0.62
 5 1 -6 5.28 0.61
 5 1 -6 5.23 0.68
 -5 -1 6 4.85 0.63
 -5 -1 6 6.45 0.72
 -5 -1 6 5.91 0.64
 5 1 -7 5.33 0.69
 5 1 -7 4.8 0.58
 5 1 -7 3.92 0.8
 5 1 -7 5.73 0.79
 5 1 -7 4.56 0.71
 5 1 -7 5.29 0.7
 -5 -1 7 5.5 0.78
 -5 -1 7 4.45 0.71
 -5 -1 7 5.43 0.78
 5 1 -8 1.29 0.84
 5 1 -8 2.41 0.77
 5 1 -8 1.43 0.5
 5 1 -8 0.34 0.57
 5 1 -8 0.13 0.9
 5 1 -8 0.53 0.76
 -5 -1 8 -0.31 0.77
 -5 -1 8 2.43 0.65
 -5 -1 8 2.21 0.87
 -5 -1 8 1.74 0.86
 5 1 -9 0.13 1.26
 5 1 -9 0.49 1.02
 5 1 -9 2.82 1.08
 5 1 -9 1.17 1.21
 -5 -1 9 1.39 1.08
 -5 -1 9 1.04 1.14
 -5 -1 9 2.4 1.19
 6 1 8 1.78 1.13
 6 1 8 1.68 1.03
 -6 -1 -8 -0.08 0.77
 6 1 7 -1.51 0.56
 6 1 7 0.68 0.63
 6 1 7 0.87 0.83
 6 1 7 -0.08 0.72
 6 1 7 0.72 0.61
 -6 -1 -7 0.09 0.6
 -6 -1 -7 -1.53 0.65
 -6 -1 -7 -0.09 0.85
 -6 -1 -7 0.34 0.51
 -6 -1 -7 0.17 0.57
 -6 -1 -7 -0.56 0.56
 6 1 6 0.97 0.47
 6 1 6 0.8 0.65
 6 1 6 0.2 0.47
 6 1 6 -0.32 0.56
 6 1 6 1.45 0.5
 -6 -1 -6 1.5 0.53
 -6 -1 -6 0.16 0.52
 -6 -1 -6 0.33 0.43
 -6 -1 -6 0.39 0.54
 -6 -1 -6 0.13 0.63
 -6 -1 -6 -0.16 0.59
 6 1 5 29.44 1.16
 6 1 5 29.09 1.1
 6 1 5 26 1.15
 6 1 5 27.39 1.11
 6 1 5 27.85 1.13
 -6 -1 -5 27.89 1.1
 -6 -1 -5 27.85 0.87
 -6 -1 -5 27.35 1.53
 -6 -1 -5 30.35 1.21
 -6 -1 -5 28.29 1.14
 6 1 4 0.59 0.4
 6 1 4 0.86 0.36
 6 1 4 0.62 0.4
 6 1 4 1.07 0.43
 6 1 4 0.93 0.33
 6 1 4 0.8 0.41
 -6 -1 -4 1.8 0.45
 -6 -1 -4 1.27 0.45
 -6 -1 -4 1.12 0.43
 -6 -1 -4 0.9 0.55
 -6 -1 -4 1.25 0.44
 -6 -1 -4 1.03 0.33
 6 1 3 5.06 0.53
 6 1 3 6.39 0.63
 6 1 3 5 0.48
 6 1 3 5.73 0.59
 6 1 3 5.56 0.55
 6 1 3 5.51 0.54
 -6 -1 -3 5.76 0.54
 -6 -1 -3 5.55 0.56
 -6 -1 -3 5.2 0.6
 -6 -1 -3 5.92 0.86
 -6 -1 -3 5.27 0.48
 -6 -1 -3 5.24 0.61
 6 1 2 68.41 1.55
 6 1 2 66.12 1.49
 6 1 2 68.78 1.49
 6 1 2 69.94 1.54
 6 1 2 67.62 1.49
 6 1 2 66.29 1.27
 -6 -1 -2 68.41 1.88
 -6 -1 -2 70.35 1.56
 -6 -1 -2 68.1 1.41
 -6 -1 -2 71.43 1.54
 -6 -1 -2 69.43 1.54
 -6 -1 -2 70.38 1.52
 6 1 1 13.56 0.68
 6 1 1 15.08 0.71
 6 1 1 12.85 0.62
 6 1 1 12.95 0.58
 -6 -1 -1 13.7 0.69
 -6 -1 -1 12.62 0.61
 -6 -1 -1 12.62 0.66
 -6 -1 -1 13.51 0.63
 -6 -1 -1 13.66 0.67
 -6 -1 -1 14.74 0.78
 6 1 0 16.05 0.49
 6 1 0 14.68 0.64
 6 1 0 15.53 0.66
 6 1 0 16.1 0.71
 6 1 0 15.54 0.68
 -6 -1 0 14.74 0.64
 -6 -1 0 15.36 0.64
 -6 -1 0 15.5 0.7
 -6 -1 0 17.48 0.74
 -6 -1 0 14.85 0.64
 -6 -1 0 15.08 0.66
 6 1 -1 14.29 0.64
 6 1 -1 12.31 0.61
 6 1 -1 12.82 0.58
 6 1 -1 12.67 0.52
 6 1 -1 13.18 0.69
 -6 -1 1 13.45 0.69
 -6 -1 1 12.52 0.59
 -6 -1 1 13.78 0.6
 -6 -1 1 12.21 0.61
 -6 -1 1 12.74 0.42
 -6 -1 1 12.32 0.62
 6 1 -2 1.81 0.37
 6 1 -2 1.89 0.32
 6 1 -2 1.34 0.31
 6 1 -2 1.54 0.21
 -6 -1 2 1.92 0.31
 -6 -1 2 1.51 0.36
 -6 -1 2 1.69 0.33
 6 1 -3 0.58 0.32
 6 1 -3 0.65 0.17
 6 1 -3 0.6 0.26
 6 1 -3 0.73 0.37
 6 1 -3 0.97 0.35
 6 1 -3 0.86 0.34
 -6 -1 3 1.14 0.33
 -6 -1 3 0.66 0.31
 -6 -1 3 0.97 0.34
 -6 -1 3 0.8 0.35
 -6 -1 3 0.68 0.3
 6 1 -4 25.65 0.97
 6 1 -4 24.44 0.68
 6 1 -4 24.8 0.93
 6 1 -4 24.98 0.87
 6 1 -4 24.9 0.86
 6 1 -4 24.19 0.83
 -6 -1 4 25.44 0.86
 -6 -1 4 25.02 0.53
 -6 -1 4 24.66 0.86
 -6 -1 4 25.37 0.97
 6 1 -5 27.34 1.11
 6 1 -5 27.95 1.03
 6 1 -5 26.31 1
 6 1 -5 26.91 1.08
 -6 -1 5 27.93 1.1
 -6 -1 5 27.72 0.98
 -6 -1 5 27.52 0.63
 -6 -1 5 27.26 1
 6 1 -6 5.68 0.68
 6 1 -6 5.4 0.65
 6 1 -6 3.86 0.62
 6 1 -6 5.53 0.67
 -6 -1 6 4.68 0.64
 -6 -1 6 5.3 0.67
 -6 -1 6 5.47 0.72
 -6 -1 6 5.82 0.63
 6 1 -7 1.38 0.63
 6 1 -7 0.48 0.59
 6 1 -7 1.42 0.65
 6 1 -7 0.82 0.57
 6 1 -7 0.85 0.71
 6 1 -7 0.89 0.72
 -6 -1 7 2.58 0.6
 -6 -1 7 2.42 0.71
 -6 -1 7 1.88 0.76
 6 1 -8 5.35 0.71
 6 1 -8 7.77 1.05
 6 1 -8 7.7 1.02
 6 1 -8 4.36 0.86
 6 1 -8 3.89 1
 -6 -1 8 4.86 0.99
 -6 -1 8 5.18 0.96
 -6 -1 8 4.51 0.73
 -6 -1 8 5.93 0.97
 6 1 -9 2.86 1.31
 6 1 -9 6.3 1.23
 6 1 -9 3.36 1.24
 -6 -1 9 5.65 1.33
 -6 -1 9 3.73 1.23
 -6 -1 9 5.27 1.24
 7 1 7 5.83 0.95
 7 1 7 6.42 1.02
 7 1 7 5.02 0.78
 7 1 7 4.78 0.71
 7 1 7 5.55 0.85
 -7 -1 -7 4.92 0.99
 -7 -1 -7 7.94 0.93
 -7 -1 -7 6.13 0.63
 -7 -1 -7 6.13 0.87
 -7 -1 -7 5.54 0.82
 7 1 6 1.2 0.52
 7 1 6 2.93 0.6
 7 1 6 1.8 0.71
 7 1 6 0.87 0.55
 7 1 6 1.61 0.64
 -7 -1 -6 2.49 0.6
 -7 -1 -6 1.71 0.61
 -7 -1 -6 1.33 0.48
 -7 -1 -6 0.23 0.69
 -7 -1 -6 1.21 0.69
 -7 -1 -6 2.19 0.54
 7 1 5 1.95 0.5
 7 1 5 1.23 0.48
 7 1 5 2.01 0.52
 7 1 5 2.44 0.63
 7 1 5 1.33 0.52
 -7 -1 -5 3.55 0.61
 -7 -1 -5 1.86 0.52
 -7 -1 -5 1.75 0.43
 -7 -1 -5 1.66 0.61
 -7 -1 -5 0.44 0.61
 7 1 4 1.45 0.47
 7 1 4 0.53 0.39
 7 1 4 0.46 0.42
 7 1 4 0.65 0.39
 7 1 4 0.68 0.4
 7 1 4 0.16 0.45
 -7 -1 -4 1.56 0.5
 -7 -1 -4 0.61 0.41
 -7 -1 -4 0.95 0.37
 -7 -1 -4 1.13 0.42
 -7 -1 -4 0.45 0.56
 -7 -1 -4 0.48 0.49
 7 1 3 0.99 0.4
 7 1 3 1.61 0.41
 7 1 3 1.52 0.31
 7 1 3 1.81 0.43
 7 1 3 0.95 0.37
 7 1 3 2.17 0.46
 -7 -1 -3 1.5 0.43
 -7 -1 -3 1.37 0.42
 -7 -1 -3 1.2 0.48
 -7 -1 -3 1.62 0.4
 -7 -1 -3 1.97 0.45
 -7 -1 -3 1.37 0.36
 7 1 2 0.05 0.36
 7 1 2 0 0.33
 7 1 2 -0.18 0.21
 7 1 2 0.78 0.35
 7 1 2 -0.4 0.34
 7 1 2 0.15 0.34
 -7 -1 -2 -0.56 0.3
 -7 -1 -2 -0.2 0.34
 -7 -1 -2 0.04 0.35
 -7 -1 -2 0 0.31
 -7 -1 -2 0.23 0.31
 -7 -1 -2 0.23 0.35
 7 1 1 59.74 1.42
 7 1 1 59.56 1.39
 7 1 1 61.12 1.43
 7 1 1 60.97 1.35
 -7 -1 -1 60.03 1.64
 -7 -1 -1 61.28 1.45
 -7 -1 -1 60.76 1.42
 -7 -1 -1 61.07 1.45
 -7 -1 -1 61.66 1.41
 7 1 0 17.32 0.74
 7 1 0 17.52 0.54
 7 1 0 18.8 0.76
 7 1 0 17.77 0.75
 7 1 0 17.6 0.68
 -7 -1 0 17.79 0.72
 -7 -1 0 17.29 0.69
 -7 -1 0 18.38 0.76
 -7 -1 0 17.34 0.72
 -7 -1 0 17.55 0.73
 -7 -1 0 18.63 0.76
 7 1 -1 50.74 1.09
 7 1 -1 52.2 1.21
 7 1 -1 53.03 1.32
 7 1 -1 52.51 1.23
 7 1 -1 52.27 1.24
 -7 -1 1 50.37 1.21
 -7 -1 1 53.59 1.23
 -7 -1 1 50.51 1.22
 -7 -1 1 53.76 1.31
 -7 -1 1 52.68 1.15
 -7 -1 1 49.57 1.22
 7 1 -2 27.95 0.66
 7 1 -2 27.5 0.85
 7 1 -2 27.88 0.85
 7 1 -2 28.69 0.92
 -7 -1 2 28.47 0.95
 -7 -1 2 26.57 0.86
 -7 -1 2 26.78 0.84
 -7 -1 2 26.61 0.66
 -7 -1 2 27.58 0.84
 7 1 -3 92.23 1.84
 7 1 -3 90.83 1.9
 7 1 -3 88.6 1.87
 7 1 -3 91.53 1.81
 7 1 -3 91.89 1.82
 -7 -1 3 90.01 1.81
 -7 -1 3 88.06 1.75
 -7 -1 3 87.98 1.81
 -7 -1 3 89.82 1.8
 7 1 -4 1.18 0.4
 7 1 -4 1.7 0.44
 7 1 -4 0.89 0.24
 7 1 -4 1.72 0.42
 7 1 -4 1.33 0.32
 7 1 -4 1.38 0.41
 -7 -1 4 1.58 0.4
 -7 -1 4 0.51 0.38
 -7 -1 4 1.76 0.4
 -7 -1 4 1.54 0.41
 7 1 -5 0.81 0.49
 7 1 -5 0.75 0.45
 7 1 -5 1.25 0.45
 7 1 -5 0.93 0.37
 7 1 -5 1.05 0.49
 -7 -1 5 1.48 0.48
 -7 -1 5 0.58 0.45
 -7 -1 5 1.05 0.48
 7 1 -6 1.88 0.56
 7 1 -6 2.1 0.61
 7 1 -6 2.02 0.54
 7 1 -6 2.09 0.54
 -7 -1 6 2.2 0.59
 -7 -1 6 2.69 0.61
 -7 -1 6 3.21 0.74
 -7 -1 6 2.74 0.27
 -7 -1 6 2.63 0.57
 7 1 -7 7.62 0.91
 7 1 -7 7.4 0.86
 7 1 -7 7.92 0.92
 7 1 -7 8.44 1.1
 7 1 -7 7.26 0.81
 7 1 -7 9.12 0.92
 -7 -1 7 8.94 0.53
 -7 -1 7 8.48 0.89
 -7 -1 7 9.7 1.13
 -7 -1 7 8.68 1
 7 1 -8 -1.92 0.79
 7 1 -8 -0.63 0.81
 7 1 -8 -0.26 0.71
 7 1 -8 -1.78 0.78
 7 1 -8 1.05 0.62
 7 1 -8 -0.4 0.9
 -7 -1 8 -0.01 0.42
 -7 -1 8 -1.31 0.6
 -7 -1 8 0.01 0.88
 -7 -1 8 -0.26 0.95
 8 1 7 1.03 0.76
 8 1 7 1.69 1.01
 8 1 7 0.36 0.82
 8 1 7 2.22 0.76
 -8 -1 -7 2.11 0.56
 -8 -1 -7 0.06 0.8
 -8 -1 -7 0.76 0.72
 -8 -1 -7 0.57 0.97
 8 1 6 2.88 0.59
 8 1 6 1.29 0.59
 8 1 6 3.3 0.67
 8 1 6 0.82 0.65
 8 1 6 1.77 0.83
 -8 -1 -6 2.49 0.8
 -8 -1 -6 0.96 0.68
 -8 -1 -6 1.63 0.53
 -8 -1 -6 1.98 0.57
 -8 -1 -6 1.98 0.62
 8 1 5 0.18 0.59
 8 1 5 2.08 0.56
 8 1 5 2.09 0.55
 8 1 5 0.55 0.49
 8 1 5 0.75 0.47
 8 1 5 0.99 0.47
 -8 -1 -5 0.75 0.61
 -8 -1 -5 -0.32 0.58
 -8 -1 -5 0.45 0.51
 -8 -1 -5 0.99 0.52
 -8 -1 -5 0.25 0.44
 8 1 4 -0.15 0.47
 8 1 4 0.79 0.45
 8 1 4 -0.29 0.43
 8 1 4 0.14 0.37
 8 1 4 0.14 0.42
 8 1 4 0.64 0.47
 -8 -1 -4 0.31 0.45
 -8 -1 -4 0.15 0.39
 -8 -1 -4 -0.36 0.52
 -8 -1 -4 -0.81 0.48
 -8 -1 -4 -0.55 0.43
 -8 -1 -4 0.14 0.47
 8 1 3 33.86 1.16
 8 1 3 35.22 1.16
 8 1 3 31.85 1.16
 8 1 3 33.26 0.91
 8 1 3 34.08 1.15
 8 1 3 34.54 1.11
 -8 -1 -3 35.03 1.2
 -8 -1 -3 34.31 1.19
 -8 -1 -3 33.46 1.49
 -8 -1 -3 33.99 1.17
 -8 -1 -3 33.57 1
 -8 -1 -3 34.4 1.17
 8 1 2 19.4 0.89
 8 1 2 20.76 0.91
 8 1 2 20.96 0.89
 8 1 2 20.87 0.63
 8 1 2 21.46 0.93
 -8 -1 -2 22.39 0.92
 -8 -1 -2 21.62 0.94
 -8 -1 -2 20.89 0.92
 -8 -1 -2 22.62 0.96
 -8 -1 -2 20.8 1.1
 8 1 1 1.89 0.43
 8 1 1 1.85 0.41
 8 1 1 2.32 0.42
 8 1 1 1.59 0.39
 -8 -1 -1 1.5 0.4
 -8 -1 -1 1.61 0.39
 -8 -1 -1 1.7 0.42
 -8 -1 -1 2.29 0.4
 -8 -1 -1 2.05 0.43
 -8 -1 -1 1.72 0.4
 8 1 0 6.88 0.4
 8 1 0 6.28 0.56
 8 1 0 7.18 0.6
 8 1 0 7.75 0.62
 8 1 0 6.6 0.62
 -8 -1 0 7.19 0.66
 -8 -1 0 7 0.59
 -8 -1 0 6.77 0.6
 -8 -1 0 7.66 0.6
 -8 -1 0 6.42 0.54
 -8 -1 0 6.78 0.65
 8 1 -1 53.15 1.31
 8 1 -1 53.97 1.39
 8 1 -1 54.59 1.32
 8 1 -1 53.14 1.16
 8 1 -1 52.51 1.27
 -8 -1 1 56.06 1.31
 -8 -1 1 54.5 1.23
 -8 -1 1 52.4 1.28
 -8 -1 1 51.84 1.29
 -8 -1 1 54.07 1.39
 -8 -1 1 52.99 1.3
 8 1 -2 14.1 0.68
 8 1 -2 14.29 0.73
 8 1 -2 14.41 0.81
 8 1 -2 13.56 0.69
 8 1 -2 13.33 0.53
 -8 -1 2 13.64 0.68
 -8 -1 2 13.03 0.44
 -8 -1 2 12.9 0.69
 -8 -1 2 14.24 0.73
 -8 -1 2 13.86 0.7
 8 1 -3 9.06 0.68
 8 1 -3 8.96 0.65
 8 1 -3 10.18 0.72
 -8 -1 3 10.84 0.66
 -8 -1 3 8.98 0.63
 -8 -1 3 8.48 0.68
 8 1 -4 -0.34 0.33
 8 1 -4 0.78 0.4
 8 1 -4 -0.07 0.41
 8 1 -4 0.6 0.42
 8 1 -4 -0.19 0.43
 -8 -1 4 0.18 0.38
 -8 -1 4 0 0.4
 -8 -1 4 -0.01 0.37
 8 1 -5 7.97 0.81
 8 1 -5 6.54 0.55
 8 1 -5 7.34 0.81
 8 1 -5 6.85 0.71
 8 1 -5 7.42 0.82
 8 1 -5 7.12 0.6
 -8 -1 5 7.44 0.79
 -8 -1 5 6.81 0.82
 -8 -1 5 7.96 0.79
 -8 -1 5 7.23 0.83
 8 1 -6 2.07 0.65
 8 1 -6 1.35 0.6
 8 1 -6 1.54 0.59
 8 1 -6 1.77 0.59
 8 1 -6 1.15 0.46
 -8 -1 6 1.71 0.6
 -8 -1 6 1.23 0.59
 -8 -1 6 0.66 0.51
 -8 -1 6 0.15 0.65
 8 1 -7 7.47 0.87
 8 1 -7 8.5 1.19
 8 1 -7 5.98 0.78
 8 1 -7 7.7 0.92
 8 1 -7 8.55 0.91
 8 1 -7 6.94 0.87
 -8 -1 7 7.11 0.83
 -8 -1 7 9.97 1.37
 -8 -1 7 7.29 0.92
 8 1 -8 1.24 0.98
 8 1 -8 0.64 0.69
 8 1 -8 2.73 0.8
 8 1 -8 1.71 0.97
 8 1 -8 0.43 0.85
 8 1 -8 1.23 0.91
 8 1 -8 2.07 0.96
 -8 -1 8 1.59 0.77
 -8 -1 8 2.1 0.99
 -8 -1 8 2.83 1.08
 9 1 7 2.4 1.15
 9 1 7 -0.05 0.92
 -9 -1 -7 -0.72 1.13
 -9 -1 -7 1.82 0.97
 9 1 6 -1.04 0.66
 9 1 6 1.35 0.65
 9 1 6 0.05 0.63
 9 1 6 -1.01 0.83
 9 1 6 -0.45 0.67
 -9 -1 -6 -1.13 0.68
 -9 -1 -6 -1.2 0.79
 -9 -1 -6 0.32 0.8
 -9 -1 -6 0.99 0.64
 9 1 5 19.45 1.17
 9 1 5 19.67 1.25
 9 1 5 19.34 1.16
 9 1 5 20.31 1.05
 9 1 5 18.9 1.05
 9 1 5 16.99 1.06
 -9 -1 -5 19 1.19
 -9 -1 -5 19.6 1.31
 -9 -1 -5 19.11 1.13
 -9 -1 -5 17.45 0.92
 -9 -1 -5 15.81 1.45
 9 1 4 11.95 0.9
 9 1 4 11.85 0.98
 9 1 4 11.9 0.79
 9 1 4 11.58 0.94
 9 1 4 10.74 0.92
 9 1 4 14.1 0.95
 -9 -1 -4 9.18 1.2
 -9 -1 -4 10.73 0.88
 -9 -1 -4 10.32 1
 -9 -1 -4 12.76 0.96
 -9 -1 -4 13.29 0.92
 9 1 3 1.05 0.46
 9 1 3 1.45 0.48
 9 1 3 0.88 0.32
 9 1 3 1.21 0.48
 9 1 3 1.31 0.5
 9 1 3 1.25 0.5
 -9 -1 -3 0.57 0.43
 -9 -1 -3 1.95 0.52
 -9 -1 -3 0.03 0.42
 -9 -1 -3 1.08 0.41
 -9 -1 -3 -0.22 0.54
 9 1 2 5.12 0.6
 9 1 2 4.82 0.58
 9 1 2 4.75 0.44
 9 1 2 4.82 0.58
 9 1 2 4.6 0.58
 -9 -1 -2 4.72 0.61
 -9 -1 -2 4.72 0.58
 -9 -1 -2 4.98 0.66
 -9 -1 -2 4.95 0.62
 -9 -1 -2 4.36 0.59
 9 1 1 9.11 0.75
 9 1 1 7.49 0.71
 9 1 1 8.17 0.69
 9 1 1 7.62 0.65
 9 1 1 7.15 0.68
 -9 -1 -1 6.31 0.73
 -9 -1 -1 7.81 0.8
 -9 -1 -1 7.14 0.65
 -9 -1 -1 7.86 0.64
 -9 -1 -1 7.8 0.72
 -9 -1 -1 7.47 0.73
 9 1 0 12.27 0.55
 9 1 0 13.5 0.78
 9 1 0 13.27 0.76
 9 1 0 12.54 0.76
 9 1 0 12.4 0.73
 9 1 0 12.45 0.5
 -9 -1 0 13.93 0.82
 -9 -1 0 12.66 0.76
 -9 -1 0 11.83 0.73
 -9 -1 0 11.65 0.73
 -9 -1 0 13.11 0.8
 -9 -1 0 14.19 0.73
 9 1 -1 20.89 0.9
 9 1 -1 21.14 0.74
 9 1 -1 21.16 0.9
 9 1 -1 19.88 0.83
 -9 -1 1 20.38 0.86
 -9 -1 1 18.86 0.84
 -9 -1 1 21.17 0.69
 -9 -1 1 20.26 0.91
 -9 -1 1 20.23 0.85
 -9 -1 1 19.55 0.85
 9 1 -2 20.69 0.98
 9 1 -2 20.78 0.89
 9 1 -2 20.54 0.9
 9 1 -2 20.81 0.68
 9 1 -2 19.62 0.84
 9 1 -2 20.66 0.83
 -9 -1 2 20.98 0.87
 -9 -1 2 20.38 0.89
 -9 -1 2 21.1 0.86
 -9 -1 2 21.53 0.92
 9 1 -3 0.36 0.41
 9 1 -3 -0.6 0.37
 9 1 -3 0.01 0.23
 9 1 -3 0.32 0.44
 9 1 -3 0.46 0.43
 -9 -1 3 -0.05 0.37
 -9 -1 3 0.05 0.25
 -9 -1 3 -0.31 0.41
 -9 -1 3 0.1 0.37
 -9 -1 3 0.01 0.4
 9 1 -4 1.06 0.49
 9 1 -4 1.14 0.42
 9 1 -4 0.57 0.41
 9 1 -4 1.13 0.47
 -9 -1 4 0.89 0.48
 -9 -1 4 0.9 0.46
 -9 -1 4 1.33 0.43
 9 1 -5 29.92 1.2
 9 1 -5 27.77 0.95
 9 1 -5 31.53 1.23
 9 1 -5 27.58 1.21
 9 1 -5 28.17 1.21
 -9 -1 5 27.71 1.17
 -9 -1 5 27.39 1.19
 -9 -1 5 28.28 1.17
 9 1 -6 5.27 0.8
 9 1 -6 7.68 0.81
 9 1 -6 5.61 0.73
 9 1 -6 5.46 0.81
 9 1 -6 5.86 0.77
 -9 -1 6 4.67 0.74
 -9 -1 6 4.58 0.7
 -9 -1 6 5.66 0.76
 9 1 -7 -0.39 0.71
 9 1 -7 -0.24 0.83
 9 1 -7 0.23 0.61
 9 1 -7 -0.93 0.55
 9 1 -7 0.24 0.74
 9 1 -7 -0.68 0.73
 -9 -1 7 0.69 0.78
 -9 -1 7 0.14 0.74
 -9 -1 7 -0.83 0.75
 -9 -1 7 -1.23 0.86
 9 1 -8 0.97 0.98
 9 1 -8 -0.19 0.99
 9 1 -8 -0.21 0.95
 9 1 -8 0.82 1.03
 9 1 -8 -0.86 0.83
 -9 -1 8 0.97 0.99
 -9 -1 8 -0.3 1.08
 10 1 6 3.2 1.04
 10 1 6 4.06 0.86
 10 1 6 2.81 0.73
 10 1 6 1.93 0.78
 10 1 6 3.82 0.75
 -10 -1 -6 3.05 1.02
 -10 -1 -6 4.01 0.86
 -10 -1 -6 0.27 0.98
 -10 -1 -6 2.99 0.78
 10 1 5 2.25 0.61
 10 1 5 4.15 0.76
 10 1 5 2.64 0.64
 10 1 5 3.85 0.89
 10 1 5 2.42 0.7
 10 1 5 4.63 0.7
 -10 -1 -5 3.55 0.93
 -10 -1 -5 0.99 0.88
 -10 -1 -5 4.01 0.8
 -10 -1 -5 3.59 0.71
 -10 -1 -5 2.19 0.59
 10 1 4 0.91 0.57
 10 1 4 1.56 0.61
 10 1 4 2.16 0.71
 10 1 4 1.73 0.46
 10 1 4 1.92 0.56
 10 1 4 2.18 0.63
 -10 -1 -4 0.44 0.77
 -10 -1 -4 2.29 0.58
 -10 -1 -4 2.06 0.61
 -10 -1 -4 2.14 0.58
 -10 -1 -4 1.33 0.69
 10 1 3 3.66 0.65
 10 1 3 3.16 0.38
 10 1 3 2.96 0.61
 10 1 3 3.68 0.64
 10 1 3 3.38 0.61
 -10 -1 -3 1.63 0.67
 -10 -1 -3 3.43 0.67
 -10 -1 -3 2.96 0.62
 -10 -1 -3 2.74 0.6
 -10 -1 -3 2.57 0.5
 10 1 2 4.26 0.61
 10 1 2 3.92 0.63
 10 1 2 4.24 0.59
 10 1 2 3.97 0.36
 10 1 2 3.52 0.58
 -10 -1 -2 4.06 0.68
 -10 -1 -2 3.68 0.59
 -10 -1 -2 4.97 0.62
 -10 -1 -2 4.07 0.62
 -10 -1 -2 3.69 0.57
 10 1 1 26.24 1.08
 10 1 1 24.74 1.09
 10 1 1 25.7 1.06
 10 1 1 24.75 1.03
 10 1 1 25.88 1.04
 -10 -1 -1 23.8 0.98
 -10 -1 -1 22.32 1.04
 -10 -1 -1 23.98 1.02
 -10 -1 -1 25.99 1.08
 -10 -1 -1 25.95 1.19
 -10 -1 -1 24.51 1.04
 10 1 0 52.03 1.1
 10 1 0 52.57 1.48
 10 1 0 52.1 1.39
 10 1 0 52.14 1.15
 10 1 0 53.69 1.47
 10 1 0 54.15 1.47
 -10 -1 0 55.01 1.52
 -10 -1 0 53.14 1.42
 -10 -1 0 52.61 1.51
 -10 -1 0 54.32 1.45
 -10 -1 0 54.6 1.54
 -10 -1 0 51.9 1.44
 10 1 -1 28.58 1.05
 10 1 -1 29.68 0.91
 10 1 -1 27.82 1.12
 10 1 -1 29.57 1.09
 -10 -1 1 30.72 1.14
 -10 -1 1 29.97 1.07
 -10 -1 1 29.4 1.07
 -10 -1 1 29.22 1.06
 -10 -1 1 28.36 1.07
 -10 -1 1 29.05 0.9
 10 1 -2 1.24 0.52
 10 1 -2 1.02 0.43
 10 1 -2 1 0.4
 10 1 -2 0.8 0.48
 10 1 -2 0.83 0.46
 10 1 -2 1.12 0.34
 -10 -1 2 1.89 0.52
 -10 -1 2 1.72 0.5
 -10 -1 2 0.75 0.46
 -10 -1 2 1.3 0.45
 10 1 -3 57.41 1.65
 10 1 -3 53.39 1.46
 10 1 -3 54.21 1.52
 10 1 -3 53.34 1.1
 10 1 -3 54.45 1.49
 -10 -1 3 54.3 1.52
 -10 -1 3 55.06 1.48
 -10 -1 3 52.06 1.11
 -10 -1 3 52.81 1.46
 -10 -1 3 52.21 1.48
 10 1 -4 13.34 0.98
 10 1 -4 13.21 0.93
 10 1 -4 14.23 0.95
 10 1 -4 13.12 0.89
 10 1 -4 12.72 0.89
 -10 -1 4 11.54 0.95
 -10 -1 4 11.47 0.89
 -10 -1 4 12.78 0.94
 -10 -1 4 12.22 0.9
 -10 -1 4 11.19 0.68
 10 1 -5 15.63 1.07
 10 1 -5 14.61 1.09
 10 1 -5 15.11 0.9
 10 1 -5 14.76 1.15
 10 1 -5 15.32 1.02
 -10 -1 5 16.72 1.08
 -10 -1 5 15.11 1.06
 -10 -1 5 12.92 1.02
 10 1 -6 0.35 0.65
 10 1 -6 -0.97 0.6
 10 1 -6 -0.24 0.68
 10 1 -6 0.25 0.7
 -10 -1 6 0.39 0.65
 -10 -1 6 0.74 0.69
 -10 -1 6 0.32 0.63
 10 1 -7 6.29 1.11
 10 1 -7 6.65 0.89
 10 1 -7 6.07 1.01
 10 1 -7 6.3 1.02
 10 1 -7 6.43 0.96
 10 1 -7 6.4 0.84
 -10 -1 7 4.5 1.05
 -10 -1 7 5.62 1
 -10 -1 7 6.81 1.01
 -10 -1 7 6.31 1.02
 10 1 -8 0.39 1.18
 10 1 -8 1.31 1.14
 10 1 -8 0.72 1.14
 -10 -1 8 0.35 1.04
 -10 -1 8 1.36 1.12
 -10 -1 8 -0.12 1.28
 11 1 6 8.98 1.32
 11 1 6 9.61 0.98
 -11 -1 -6 9.53 1.32
 11 1 5 4.99 0.81
 11 1 5 4.56 0.97
 11 1 5 3.84 0.67
 11 1 5 4.39 0.84
 11 1 5 6.09 0.91
 11 1 5 3.94 0.77
 -11 -1 -5 7.23 0.92
 -11 -1 -5 4.88 0.94
 -11 -1 -5 3.99 1
 -11 -1 -5 1.39 0.99
 -11 -1 -5 5.66 0.79
 11 1 4 2.43 0.74
 11 1 4 3.09 0.71
 11 1 4 2.46 0.66
 11 1 4 1.76 0.71
 11 1 4 2.1 0.49
 -11 -1 -4 1.5 0.77
 -11 -1 -4 2.85 0.7
 -11 -1 -4 1.77 0.88
 -11 -1 -4 2.15 0.67
 -11 -1 -4 1.72 0.68
 11 1 3 0.04 0.59
 11 1 3 0.47 0.52
 11 1 3 0.43 0.36
 11 1 3 0.09 0.52
 11 1 3 0.44 0.54
 -11 -1 -3 0.74 0.67
 -11 -1 -3 0.77 0.53
 -11 -1 -3 -0.87 0.63
 -11 -1 -3 0.05 0.54
 -11 -1 -3 0.33 0.55
 11 1 2 15.43 0.99
 11 1 2 16.01 1.1
 11 1 2 14.73 0.99
 11 1 2 15.21 1.01
 11 1 2 14.78 0.63
 -11 -1 -2 14.87 1
 -11 -1 -2 15.22 0.94
 -11 -1 -2 14.51 0.95
 -11 -1 -2 15.59 1
 -11 -1 -2 16.1 1.31
 -11 -1 -2 15.25 1.07
 11 1 1 9.33 0.9
 11 1 1 9.64 0.77
 11 1 1 8.96 0.63
 11 1 1 7.62 0.88
 11 1 1 9.69 0.89
 11 1 1 9.52 0.86
 -11 -1 -1 7.7 0.78
 -11 -1 -1 10.09 0.91
 -11 -1 -1 8.9 0.82
 -11 -1 -1 9.94 0.86
 -11 -1 -1 9.92 1.03
 -11 -1 -1 9.06 0.85
 11 1 0 0.8 0.45
 11 1 0 0.02 0.46
 11 1 0 0.96 0.34
 11 1 0 0.45 0.24
 11 1 0 0.98 0.53
 11 1 0 1.04 0.57
 -11 -1 0 0.97 0.49
 -11 -1 0 0.28 0.49
 -11 -1 0 0.58 0.5
 -11 -1 0 0.57 0.42
 -11 -1 0 0.54 0.47
 -11 -1 0 0.98 0.47
 11 1 -1 0.06 0.37
 11 1 -1 0.39 0.5
 11 1 -1 0.86 0.46
 11 1 -1 0.82 0.52
 -11 -1 1 1.24 0.5
 -11 -1 1 0.71 0.48
 -11 -1 1 0.44 0.52
 -11 -1 1 0.43 0.31
 -11 -1 1 0.41 0.45
 -11 -1 1 1.32 0.52
 -11 -1 1 0.47 0.45
 11 1 -2 6.97 0.74
 11 1 -2 5.2 0.61
 11 1 -2 8.44 0.88
 11 1 -2 5.92 0.58
 11 1 -2 5.18 0.5
 11 1 -2 4.9 0.68
 -11 -1 2 4.99 0.65
 -11 -1 2 7.14 0.74
 -11 -1 2 5.28 0.64
 -11 -1 2 4.36 0.61
 11 1 -3 0.55 0.34
 11 1 -3 1.48 0.55
 11 1 -3 1.32 0.52
 11 1 -3 0.75 0.58
 11 1 -3 1.47 0.55
 -11 -1 3 0.34 0.52
 -11 -1 3 1.13 0.56
 -11 -1 3 -0.11 0.45
 -11 -1 3 1.04 0.54
 11 1 -4 11.22 1
 11 1 -4 12.24 1.05
 11 1 -4 11.02 1.04
 11 1 -4 12.83 1.02
 11 1 -4 10.08 0.99
 -11 -1 4 12.7 0.67
 -11 -1 4 12.18 1.02
 -11 -1 4 13.69 1.03
 -11 -1 4 11.64 0.96
 -11 -1 4 12.21 0.98
 -11 -1 4 12.93 1.05
 11 1 -5 3.01 0.69
 11 1 -5 2.05 0.69
 11 1 -5 2.5 0.62
 11 1 -5 1.83 0.71
 11 1 -5 2.43 0.68
 -11 -1 5 2.28 0.68
 -11 -1 5 2.54 0.7
 -11 -1 5 2.97 0.7
 11 1 -6 4.79 0.93
 11 1 -6 5.51 0.92
 11 1 -6 5.54 0.94
 11 1 -6 4.49 0.79
 11 1 -6 4.51 0.6
 -11 -1 6 4.75 0.89
 -11 -1 6 6.16 0.91
 -11 -1 6 4.6 0.86
 11 1 -7 1.47 0.97
 11 1 -7 -0.36 0.87
 11 1 -7 0.23 0.96
 11 1 -7 -0.3 1.04
 11 1 -7 1.62 0.98
 11 1 -7 0.58 0.83
 -11 -1 7 1.23 0.93
 -11 -1 7 0.23 0.97
 -11 -1 7 -0.63 1.01
 -11 -1 7 0.23 0.89
 12 1 5 1.02 0.96
 12 1 5 1.7 0.83
 12 1 5 0.26 0.9
 12 1 5 1.27 0.66
 -12 -1 -5 -0.87 1.12
 -12 -1 -5 1.78 1.07
 -12 -1 -5 0.59 0.92
 -12 -1 -5 1.98 0.91
 12 1 4 1.48 0.78
 12 1 4 3.51 0.54
 12 1 4 4.77 0.85
 12 1 4 4.24 0.81
 12 1 4 2.9 0.87
 -12 -1 -4 2.13 1.01
 -12 -1 -4 3.87 0.77
 -12 -1 -4 2.76 0.95
 -12 -1 -4 3.94 0.89
 -12 -1 -4 2.79 0.79
 12 1 3 9.03 0.72
 12 1 3 11.37 1.13
 12 1 3 10.49 1.06
 12 1 3 9.34 1.12
 12 1 3 9.95 1.17
 -12 -1 -3 9.31 1.12
 -12 -1 -3 10.75 1.06
 -12 -1 -3 10.22 1.28
 -12 -1 -3 10.07 0.97
 -12 -1 -3 9.73 1.02
 -12 -1 -3 9.9 1.1
 12 1 2 0.72 0.31
 12 1 2 1.61 0.6
 12 1 2 2.01 0.64
 12 1 2 0.27 0.64
 12 1 2 -0.45 0.6
 -12 -1 -2 0.39 0.58
 -12 -1 -2 -0.01 0.59
 -12 -1 -2 -0.4 0.55
 -12 -1 -2 0.39 0.64
 -12 -1 -2 0.45 0.63
 -12 -1 -2 -0.36 0.67
 12 1 1 1.2 0.61
 12 1 1 0.98 0.57
 12 1 1 0.56 0.39
 12 1 1 0.87 0.61
 12 1 1 0.58 0.31
 12 1 1 -0.41 0.54
 12 1 1 0.56 0.46
 -12 -1 -1 -0.27 0.49
 -12 -1 -1 0.11 0.54
 -12 -1 -1 1.26 0.59
 -12 -1 -1 0.76 0.58
 -12 -1 -1 0.68 0.61
 -12 -1 -1 0.6 0.6
 12 1 0 14.83 1.08
 12 1 0 17.91 1.1
 12 1 0 12.99 1.03
 12 1 0 15.22 0.75
 12 1 0 14.69 1.04
 -12 -1 0 15.15 0.96
 -12 -1 0 14.81 1.04
 -12 -1 0 15.87 1.05
 -12 -1 0 17.09 1.03
 -12 -1 0 16.28 1.05
 -12 -1 0 15.84 1.03
 12 1 -1 2.81 0.61
 12 1 -1 2.8 0.47
 12 1 -1 2.81 0.66
 12 1 -1 2.1 0.6
 -12 -1 1 2.86 0.64
 -12 -1 1 1.98 0.6
 -12 -1 1 2.61 0.65
 -12 -1 1 2.77 0.41
 -12 -1 1 1.87 0.6
 -12 -1 1 3.82 0.62
 -12 -1 1 2.32 0.58
 12 1 -2 14 1.01
 12 1 -2 14.76 1.1
 12 1 -2 16.1 0.97
 12 1 -2 15.48 1.12
 12 1 -2 16.53 0.84
 -12 -1 2 15.49 1.08
 -12 -1 2 15.48 1.09
 -12 -1 2 14.46 1.04
 -12 -1 2 12.57 1
 12 1 -3 0.52 0.63
 12 1 -3 0.38 0.38
 12 1 -3 -0.3 0.53
 12 1 -3 -0.15 0.58
 12 1 -3 0.63 0.56
 -12 -1 3 -0.65 0.5
 -12 -1 3 0.74 0.58
 -12 -1 3 0.52 0.58
 -12 -1 3 0.64 0.63
 12 1 -4 -0.45 0.59
 12 1 -4 1.49 0.69
 12 1 -4 0.19 0.63
 12 1 -4 -0.62 0.61
 12 1 -4 -0.21 0.64
 -12 -1 4 -0.42 0.63
 -12 -1 4 -1.18 0.59
 -12 -1 4 -0.21 0.31
 -12 -1 4 1.02 0.55
 -12 -1 4 -0.35 0.6
 -12 -1 4 -0.97 0.6
 12 1 -5 2.34 0.77
 12 1 -5 2.22 0.86
 12 1 -5 3.43 0.74
 12 1 -5 1.9 0.74
 12 1 -5 3.21 0.74
 -12 -1 5 3.41 0.78
 -12 -1 5 3.98 0.8
 -12 -1 5 2.46 0.53
 -12 -1 5 3.35 0.82
 -12 -1 5 3.23 0.64
 12 1 -6 4.42 1.06
 12 1 -6 4.78 0.92
 12 1 -6 4.47 0.85
 12 1 -6 4.59 1.07
 12 1 -6 3.74 0.72
 12 1 -6 6.77 0.99
 -12 -1 6 4.76 0.98
 -12 -1 6 3.27 0.93
 -12 -1 6 5.72 0.96
 12 1 -7 0.71 1.1
 12 1 -7 1.67 1.1
 12 1 -7 1.43 1.24
 -12 -1 7 1.86 1.07
 -12 -1 7 2.46 1.14
 -12 -1 7 1.39 1.04
 13 1 4 0.95 0.53
 13 1 4 0.05 0.95
 13 1 4 1.92 0.95
 13 1 4 3.68 0.84
 13 1 4 2.99 1.01
 -13 -1 -4 0.52 1.14
 -13 -1 -4 3.06 1.01
 -13 -1 -4 1.2 0.83
 -13 -1 -4 0.81 1.01
 -13 -1 -4 -0.97 0.84
 13 1 3 7.47 0.94
 13 1 3 6.87 0.69
 13 1 3 10.16 1.26
 13 1 3 8.77 1.06
 13 1 3 7.37 1.04
 -13 -1 -3 6.5 0.97
 -13 -1 -3 7 0.87
 -13 -1 -3 10.14 1.15
 -13 -1 -3 7.7 1
 -13 -1 -3 6.05 1.16
 -13 -1 -3 10.07 1.15
 13 1 2 0.2 0.56
 13 1 2 1.43 0.73
 13 1 2 -0.13 0.33
 13 1 2 0.27 0.75
 13 1 2 -0.35 0.7
 -13 -1 -2 -0.73 0.54
 -13 -1 -2 0.32 0.73
 -13 -1 -2 -0.29 0.7
 -13 -1 -2 -0.15 0.8
 -13 -1 -2 -0.08 0.7
 -13 -1 -2 0.29 0.66
 13 1 1 4.64 0.81
 13 1 1 3.07 0.4
 13 1 1 3.61 0.75
 13 1 1 2.88 0.43
 13 1 1 3.21 0.63
 13 1 1 2.31 0.74
 13 1 1 3.77 0.76
 13 1 1 3.07 0.47
 -13 -1 -1 3.44 0.75
 -13 -1 -1 2.52 0.75
 -13 -1 -1 3.31 0.71
 -13 -1 -1 4.51 0.72
 -13 -1 -1 3.25 0.75
 -13 -1 -1 3.43 0.77
 13 1 0 18.47 1.22
 13 1 0 18.35 1.16
 13 1 0 17.33 1.24
 13 1 0 17.99 1.24
 13 1 0 18.26 0.85
 -13 -1 0 18.85 1.16
 -13 -1 0 19 1.23
 -13 -1 0 21.32 1.25
 -13 -1 0 18.57 1.2
 -13 -1 0 17.15 1.06
 -13 -1 0 19.34 1.21
 13 1 -1 21.46 1.2
 13 1 -1 22.34 1.27
 13 1 -1 21.49 1.28
 13 1 -1 20.73 1
 13 1 -1 23.29 1.2
 -13 -1 1 19.49 1.2
 -13 -1 1 22.6 1.23
 -13 -1 1 22.07 1.16
 -13 -1 1 19.98 1.23
 -13 -1 1 21 1.27
 -13 -1 1 21.96 1.2
 -13 -1 1 20.74 0.93
 13 1 -2 -1.23 0.64
 13 1 -2 -0.1 0.49
 13 1 -2 0.15 0.64
 13 1 -2 -0.68 0.63
 13 1 -2 -0.16 0.51
 -13 -1 2 0.65 0.67
 -13 -1 2 0.06 0.62
 -13 -1 2 0.32 0.56
 -13 -1 2 0.31 0.7
 13 1 -3 0.74 0.64
 13 1 -3 0.94 0.71
 13 1 -3 0.43 0.67
 13 1 -3 1.12 0.46
 13 1 -3 0.8 0.68
 -13 -1 3 2.18 0.73
 -13 -1 3 1.11 0.65
 -13 -1 3 1.14 0.7
 -13 -1 3 1.07 0.7
 13 1 -4 9.14 0.94
 13 1 -4 5.64 0.83
 13 1 -4 7.62 0.92
 13 1 -4 7.88 0.89
 13 1 -4 9.41 1.01
 -13 -1 4 7.52 0.92
 -13 -1 4 8.9 0.96
 -13 -1 4 8.88 0.93
 -13 -1 4 8.18 0.9
 -13 -1 4 7.48 0.89
 13 1 -5 1.38 0.8
 13 1 -5 0.33 0.9
 13 1 -5 1.24 0.87
 13 1 -5 1.45 0.86
 13 1 -5 1.07 0.91
 -13 -1 5 1.32 0.47
 -13 -1 5 1.17 0.74
 -13 -1 5 1.06 0.84
 -13 -1 5 0.52 0.8
 -13 -1 5 1.4 0.86
 13 1 -6 -0.63 0.91
 13 1 -6 1.81 0.97
 13 1 -6 0.15 0.96
 13 1 -6 0.49 0.76
 13 1 -6 0.09 1.18
 13 1 -6 0.42 1.05
 -13 -1 6 0.88 0.99
 -13 -1 6 0.22 0.91
 -13 -1 6 0.34 0.68
 -13 -1 6 -0.25 0.97
 -13 -1 6 0.8 0.78
 14 1 4 1.6 1.19
 -14 -1 -4 -0.4 1.14
 14 1 3 0.93 0.92
 14 1 3 2.17 0.96
 14 1 3 1.41 0.85
 14 1 3 1.6 0.99
 14 1 3 1.15 0.39
 -14 -1 -3 -0.43 1.13
 -14 -1 -3 0.52 0.94
 -14 -1 -3 0.43 0.94
 -14 -1 -3 1.79 0.97
 -14 -1 -3 0.57 1.01
 -14 -1 -3 2.33 0.88
 14 1 2 2.85 0.81
 14 1 2 3.04 0.38
 14 1 2 3.32 0.93
 14 1 2 4.64 0.7
 14 1 2 3.41 0.91
 14 1 2 4.87 0.97
 14 1 2 3.36 0.44
 -14 -1 -2 3.59 0.95
 -14 -1 -2 4.45 0.9
 -14 -1 -2 2.15 0.74
 -14 -1 -2 5.33 0.99
 -14 -1 -2 3.19 0.96
 -14 -1 -2 2.37 1.02
 14 1 1 20.63 0.81
 14 1 1 22.32 1.39
 14 1 1 21.7 1.3
 14 1 1 20.53 1.47
 14 1 1 21.08 0.86
 14 1 1 20.88 0.8
 14 1 1 24.46 1.44
 14 1 1 24.04 1.47
 -14 -1 -1 22.6 1.27
 -14 -1 -1 21.87 1.46
 -14 -1 -1 23.79 1.45
 -14 -1 -1 22.73 1.59
 -14 -1 -1 24.44 1.46
 -14 -1 -1 24.37 1.38
 14 1 0 3.5 0.52
 14 1 0 4.08 0.89
 14 1 0 2.75 0.77
 14 1 0 3.46 0.81
 14 1 0 3.91 0.77
 -14 -1 0 4.19 0.83
 -14 -1 0 3.27 0.81
 -14 -1 0 3.96 0.83
 -14 -1 0 4.12 0.72
 -14 -1 0 4.51 0.83
 -14 -1 0 3.67 0.69
 14 1 -1 1.6 0.54
 14 1 -1 0.91 0.62
 14 1 -1 1.46 0.75
 14 1 -1 0.95 0.83
 14 1 -1 0.86 0.78
 -14 -1 1 1.82 0.65
 -14 -1 1 1.69 0.76
 -14 -1 1 0.35 0.72
 -14 -1 1 1.4 0.44
 -14 -1 1 1.43 0.82
 -14 -1 1 2.07 0.79
 -14 -1 1 0.88 0.62
 14 1 -2 2.43 0.66
 14 1 -2 1.53 0.73
 14 1 -2 2.17 0.84
 14 1 -2 3.25 0.81
 14 1 -2 2.28 0.77
 14 1 -2 2.33 0.64
 -14 -1 2 2.42 0.63
 -14 -1 2 3.21 0.71
 -14 -1 2 2.19 0.8
 -14 -1 2 2.6 0.81
 -14 -1 2 3.65 0.9
 14 1 -3 4.74 0.88
 14 1 -3 4.35 0.6
 14 1 -3 5.75 0.79
 14 1 -3 4.29 0.79
 14 1 -3 4.51 0.92
 -14 -1 3 5.15 0.86
 -14 -1 3 5.33 0.91
 -14 -1 3 3.75 0.74
 -14 -1 3 4.28 0.9
 14 1 -4 -0.29 0.82
 14 1 -4 0.54 0.79
 14 1 -4 -0.86 0.84
 14 1 -4 -0.37 0.92
 14 1 -4 0.24 0.81
 14 1 -4 -0.98 0.66
 -14 -1 4 0.39 0.91
 -14 -1 4 -1.19 0.64
 -14 -1 4 0.5 0.83
 -14 -1 4 0.01 0.82
 -14 -1 4 -1.48 0.77
 14 1 -5 3.9 1.01
 14 1 -5 1.51 1.09
 14 1 -5 3.02 0.96
 14 1 -5 2.1 0.96
 14 1 -5 1 0.9
 14 1 -5 2.45 1.09
 -14 -1 5 2 0.93
 -14 -1 5 2.8 1.02
 -14 -1 5 2.66 0.73
 -14 -1 5 2.01 0.98
 14 1 -6 -0.84 1.1
 -14 -1 6 0.32 1.17
 15 1 2 2.09 0.68
 15 1 2 4.16 1.14
 15 1 2 2.84 1.09
 15 1 2 2.6 0.91
 15 1 2 2.22 1.06
 -15 -1 -2 0.23 1.03
 -15 -1 -2 4.95 1.1
 -15 -1 -2 2.32 1.14
 -15 -1 -2 -0.04 0.82
 -15 -1 -2 0.84 1.05
 -15 -1 -2 0.49 1.03
 15 1 1 1.76 0.4
 15 1 1 2.03 0.96
 15 1 1 1.71 1.01
 15 1 1 1.95 0.82
 15 1 1 1.76 0.94
 15 1 1 0.56 0.9
 15 1 1 1.87 0.45
 -15 -1 -1 2.29 0.83
 -15 -1 -1 3.72 1.05
 -15 -1 -1 1.59 0.92
 -15 -1 -1 1.41 0.97
 -15 -1 -1 1.6 0.91
 -15 -1 -1 2.41 0.97
 15 1 0 1.7 0.91
 15 1 0 0.06 0.82
 15 1 0 0.16 0.81
 15 1 0 1.19 0.52
 15 1 0 0.94 0.92
 -15 -1 0 1.83 0.9
 -15 -1 0 1.53 0.9
 -15 -1 0 1.11 0.9
 -15 -1 0 1.72 0.73
 -15 -1 0 0.98 0.7
 -15 -1 0 1.73 0.91
 15 1 -1 0.76 0.94
 15 1 -1 -0.73 0.66
 15 1 -1 1.44 0.86
 15 1 -1 0.94 0.6
 15 1 -1 1.6 0.77
 15 1 -1 0.54 0.82
 -15 -1 1 -0.8 0.67
 -15 -1 1 1.16 0.86
 -15 -1 1 0.66 0.87
 -15 -1 1 -1.07 0.72
 -15 -1 1 0.95 0.86
 15 1 -2 -0.09 0.78
 15 1 -2 0.84 0.83
 15 1 -2 0.28 0.68
 15 1 -2 -0.86 0.67
 15 1 -2 -0.22 0.77
 -15 -1 2 0.99 0.74
 -15 -1 2 -0.51 0.8
 -15 -1 2 -0.08 0.64
 -15 -1 2 -0.3 0.86
 -15 -1 2 -0.72 0.89
 15 1 -3 9.95 0.99
 15 1 -3 10.44 1.15
 15 1 -3 10.13 1.14
 15 1 -3 11.12 1.32
 15 1 -3 9.8 1.02
 15 1 -3 11.11 1.23
 -15 -1 3 12.98 1.5
 -15 -1 3 10.95 1.27
 -15 -1 3 10.2 1.14
 -15 -1 3 13.2 1.49
 15 1 -4 3.37 1.08
 15 1 -4 4.85 1.15
 15 1 -4 3.04 1.01
 15 1 -4 4.12 1.01
 15 1 -4 2.38 1.01
 15 1 -4 3.12 0.91
 -15 -1 4 2.01 1.01
 -15 -1 4 3.1 1
 -15 -1 4 4.41 0.85
 -15 -1 4 5.05 1.12
 -15 -1 4 5.04 1.22
 15 1 -5 -1.83 1.09
 15 1 -5 1.99 1.15
 15 1 -5 -0.33 1.17
 15 1 -5 0.48 1.33
 -15 -1 5 1.95 1.14
 -15 -1 5 -0.24 1.12
 -15 -1 5 0.88 1.13
 16 1 1 -0.09 1.09
 16 1 1 -0.22 1.06
 16 1 1 0.02 1.01
 -16 -1 -1 2.1 1.16
 -16 -1 -1 0.42 1.07
 -16 -1 -1 -0.81 1.12
 -16 -1 -1 2.76 1.14
 -16 -1 -1 0.45 1.11
 16 1 0 0.81 1.04
 16 1 0 0.6 1.09
 16 1 0 -0.81 1.02
 -16 -1 0 0.97 1.07
 -16 -1 0 0.43 1
 -16 -1 0 0.71 0.86
 -16 -1 0 0.87 1.08
 -16 -1 0 0.68 1.1
 -16 -1 0 0.2 0.79
 -16 -1 0 -1.86 0.92
 16 1 -1 12.37 1.17
 16 1 -1 12.49 1.48
 16 1 -1 12.41 1.3
 16 1 -1 14.76 1.6
 16 1 -1 11.16 1.32
 -16 -1 1 14.64 1.63
 -16 -1 1 11.6 1.29
 -16 -1 1 11.56 1.29
 -16 -1 1 13.29 1.34
 -16 -1 1 9.54 1.06
 16 1 -2 5.57 1.16
 16 1 -2 3.96 0.86
 16 1 -2 5.06 0.91
 16 1 -2 4.22 1.1
 -16 -1 2 4.88 0.94
 -16 -1 2 4.12 1.09
 -16 -1 2 3.73 1.13
 -16 -1 2 4.6 1.16
 -16 -1 2 4.3 0.99
 16 1 -3 0.5 0.96
 16 1 -3 1.5 1.03
 16 1 -3 -0.21 1.2
 -16 -1 3 2.24 1.17
 -16 -1 3 1.34 1.02
 -16 -1 3 3.84 1.11
 -16 2 3 1.63 1.07
 -16 2 3 0.07 1.08
 -16 2 3 0.25 1.04
 16 -2 -3 1.18 1.01
 16 -2 -3 -1.07 1.12
 16 -2 -3 0.3 1.04
 -16 2 2 0.27 1.04
 -16 2 2 0.29 0.95
 -16 2 2 0.26 0.91
 -16 2 2 -2.57 0.94
 -16 2 2 -0.61 0.99
 16 -2 -2 0.46 0.9
 16 -2 -2 -1.13 0.73
 16 -2 -2 2.45 1
 16 -2 -2 -0.52 1.06
 -16 2 1 1.16 1.05
 -16 2 1 1.37 1.05
 -16 2 1 1.1 0.94
 -16 2 1 0.91 1.02
 -16 2 1 3.07 1.05
 16 -2 -1 2.98 1.12
 16 -2 -1 2.22 0.97
 16 -2 -1 1.66 0.83
 16 -2 -1 3.07 1.1
 -16 2 0 2.87 0.9
 -16 2 0 3.45 1.1
 -16 2 0 3.52 1.02
 -16 2 0 2.21 1.06
 -16 2 0 3.57 1.05
 -16 2 0 3.59 1.09
 16 -2 0 1.89 1.05
 16 -2 0 1.8 0.97
 16 -2 0 3.06 1.02
 16 -2 0 3.14 1.19
 16 -2 0 2.14 0.77
 -16 2 -1 6.2 1.15
 -16 2 -1 4.74 1.15
 -16 2 -1 4.73 1.19
 -16 2 -1 4.5 1.14
 -16 2 -1 5.4 1.25
 16 -2 1 6.68 1.18
 16 -2 1 4.02 1.13
 16 -2 1 6.96 1.24
 -15 2 5 0.13 1.2
 -15 2 5 1.56 1.14
 15 -2 -5 2.82 1.19
 15 -2 -5 1.56 1.22
 15 -2 -5 0.54 1.16
 -15 2 4 1.01 0.92
 -15 2 4 0.15 1
 -15 2 4 1.21 1.03
 -15 2 4 0.06 1
 15 -2 -4 0.03 0.98
 15 -2 -4 -2.61 0.89
 15 -2 -4 -0.06 1.01
 15 -2 -4 0.86 1.02
 -15 2 3 8.83 1.15
 -15 2 3 6.01 1
 -15 2 3 5.56 1.07
 -15 2 3 6.42 1.04
 15 -2 -3 6.83 1.09
 15 -2 -3 5.63 0.96
 15 -2 -3 4.47 1
 15 -2 -3 5.94 0.65
 -15 2 2 5.07 1
 -15 2 2 3.58 0.96
 -15 2 2 3.78 0.81
 -15 2 2 5.39 1.03
 -15 2 2 3.03 0.9
 15 -2 -2 4.71 1.11
 15 -2 -2 3.09 0.94
 15 -2 -2 3.91 0.84
 15 -2 -2 5.1 0.75
 -15 2 1 9.83 1.06
 -15 2 1 11.22 1.28
 -15 2 1 11.97 1.42
 -15 2 1 12.05 1.35
 -15 2 1 12.98 1.39
 15 -2 -1 11.99 1.25
 15 -2 -1 12.77 1.42
 15 -2 -1 12.49 1.4
 15 -2 -1 14.48 1.48
 -15 2 0 5.19 1.05
 -15 2 0 4.44 0.9
 -15 2 0 4.4 0.97
 -15 2 0 3.42 0.81
 -15 2 0 6.33 1.05
 15 -2 0 3.93 0.73
 15 -2 0 4.26 1.04
 15 -2 0 5.03 0.97
 15 -2 0 4.32 0.96
 -15 2 -1 5.41 1.04
 -15 2 -1 7.54 1.07
 -15 2 -1 6.7 1.06
 -15 2 -1 5.46 0.94
 -15 2 -1 5.04 0.95
 -15 2 -1 4.86 1.04
 15 -2 1 5.47 1.02
 15 -2 1 6.76 1.07
 15 -2 1 7.26 1.05
 15 -2 1 4.76 0.71
 15 -2 1 6.47 1.14
 15 -2 1 5.88 0.68
 -15 2 -2 3.95 0.95
 -15 2 -2 1.78 0.93
 -15 2 -2 1.4 0.99
 -15 2 -2 2.33 0.99
 -15 2 -2 2.19 1.1
 -15 2 -2 2.82 1.18
 15 -2 2 2.04 0.99
 15 -2 2 2.08 0.63
 15 -2 2 1.86 1.07
 15 -2 2 3.34 0.92
 15 -2 2 4.53 1.05
 -14 2 5 5.6 1.1
 -14 2 5 6.66 1.07
 -14 2 5 7.73 1
 -14 2 5 6.86 1.07
 14 -2 -5 7.2 1.2
 14 -2 -5 6.65 1.11
 14 -2 -5 5.87 1.03
 14 -2 -5 6.39 1.14
 -14 2 4 0.6 0.91
 -14 2 4 -0.27 0.77
 -14 2 4 -0.84 0.82
 -14 2 4 0.31 0.9
 14 -2 -4 1.55 0.81
 14 -2 -4 1.56 0.86
 14 -2 -4 1.07 0.87
 14 -2 -4 1.18 0.9
 -14 2 3 2.1 0.75
 -14 2 3 1.55 0.8
 -14 2 3 1.67 0.83
 -14 2 3 2 0.86
 14 -2 -3 1.82 0.82
 14 -2 -3 2.42 0.9
 14 -2 -3 2.89 0.8
 14 -2 -3 1.72 0.5
 14 -2 -3 2.06 0.86
 -14 2 2 2.4 0.82
 -14 2 2 1.44 0.75
 -14 2 2 2.16 0.77
 -14 2 2 1.5 0.79
 14 -2 -2 1.06 0.73
 14 -2 -2 1.63 0.69
 14 -2 -2 2.69 0.6
 14 -2 -2 0.16 0.79
 14 -2 -2 1.97 0.84
 -14 2 1 5.93 0.87
 -14 2 1 6.27 0.82
 -14 2 1 6.33 0.88
 -14 2 1 6.82 0.95
 -14 2 1 6.82 0.96
 -14 2 1 5.95 0.8
 14 -2 -1 6.1 0.95
 14 -2 -1 6.88 0.96
 14 -2 -1 5.64 0.71
 14 -2 -1 7.4 0.9
 -14 2 0 4.44 0.84
 -14 2 0 3.04 0.77
 -14 2 0 2.96 0.71
 -14 2 0 3.44 0.83
 -14 2 0 2.55 0.78
 -14 2 0 3.12 0.75
 14 -2 0 4.52 0.92
 14 -2 0 3.66 0.63
 14 -2 0 3.77 0.84
 14 -2 0 4.17 0.82
 -14 2 -1 1.52 0.68
 -14 2 -1 0.18 0.74
 -14 2 -1 0.32 0.74
 -14 2 -1 0.09 0.72
 -14 2 -1 -0.21 0.81
 -14 2 -1 -0.03 0.79
 14 -2 1 -0.47 0.76
 14 -2 1 0.07 0.73
 14 -2 1 -0.23 0.72
 14 -2 1 0.35 0.76
 14 -2 1 -0.4 0.67
 -14 2 -2 -0.05 0.92
 -14 2 -2 0.59 0.79
 -14 2 -2 0.23 0.74
 -14 2 -2 -0.3 0.78
 -14 2 -2 0.19 0.96
 -14 2 -2 -0.56 0.79
 14 -2 2 0.32 0.68
 14 -2 2 -1.05 0.85
 14 -2 2 -0.11 0.8
 14 -2 2 0.34 0.52
 14 -2 2 -1.59 0.74
 -14 2 -3 -0.64 0.86
 -14 2 -3 0.87 0.49
 -14 2 -3 0.31 0.82
 -14 2 -3 -0.77 0.88
 -14 2 -3 -0.5 0.89
 -14 2 -3 -0.1 1.13
 -14 2 -3 -0.2 1.06
 14 -2 3 0.35 0.58
 14 -2 3 -0.49 0.85
 14 -2 3 -0.83 0.94
 14 -2 3 0.41 0.8
 14 -2 3 0.07 0.88
 -14 2 -4 0.58 1.23
 -14 2 -4 -1.11 1.11
 -13 2 6 -0.15 0.6
 -13 2 6 -0.57 1
 -13 2 6 1.1 0.77
 -13 2 6 0.57 0.92
 -13 2 6 -0.85 0.98
 13 -2 -6 0.63 0.77
 13 -2 -6 2.48 0.97
 13 -2 -6 0.98 0.93
 13 -2 -6 -0.69 0.96
 -13 2 5 0.23 0.79
 -13 2 5 1.19 0.74
 -13 2 5 0.56 0.85
 -13 2 5 1.03 0.78
 13 -2 -5 2.47 0.67
 13 -2 -5 0.61 0.76
 13 -2 -5 1.47 0.86
 13 -2 -5 0.96 0.9
 13 -2 -5 0.6 0.83
 -13 2 4 0.91 0.74
 -13 2 4 1.14 0.81
 -13 2 4 -0.37 0.61
 -13 2 4 -0.54 0.69
 13 -2 -4 1.11 0.61
 13 -2 -4 -0.16 0.71
 13 -2 -4 -0.23 0.72
 13 -2 -4 0.96 0.76
 -13 2 3 6.55 0.86
 -13 2 3 6.06 0.85
 -13 2 3 7.28 0.82
 -13 2 3 6.89 0.87
 13 -2 -3 8.31 1.06
 13 -2 -3 6.47 0.83
 13 -2 -3 7.92 0.94
 13 -2 -3 7.72 0.84
 13 -2 -3 6.63 0.65
 -13 2 2 0.19 0.57
 -13 2 2 -0.29 0.57
 -13 2 2 -0.37 0.63
 -13 2 2 -0.48 0.63
 13 -2 -2 0.48 0.6
 13 -2 -2 0.51 0.61
 13 -2 -2 -0.52 0.67
 13 -2 -2 -0.2 0.7
 13 -2 -2 0.63 0.46
 -13 2 1 1.41 0.5
 -13 2 1 2.18 0.61
 -13 2 1 1.57 0.65
 -13 2 1 1.32 0.56
 -13 2 1 0.59 0.64
 -13 2 1 1.34 0.61
 13 -2 -1 1.15 0.55
 13 -2 -1 1.69 0.69
 13 -2 -1 1.02 0.69
 13 -2 -1 1.13 0.65
 -13 2 0 4.03 0.75
 -13 2 0 4.11 0.76
 -13 2 0 3.11 0.66
 -13 2 0 2.97 0.68
 -13 2 0 3.91 0.7
 -13 2 0 2.8 0.74
 13 -2 0 3.81 0.58
 13 -2 0 5.31 0.81
 13 -2 0 4.3 0.79
 13 -2 0 3.42 0.7
 -13 2 -1 0.14 0.61
 -13 2 -1 0.37 0.62
 -13 2 -1 0.82 0.7
 -13 2 -1 0.81 0.61
 -13 2 -1 -0.74 0.73
 -13 2 -1 0.48 0.6
 13 -2 1 0.31 0.3
 13 -2 1 0.51 0.6
 13 -2 1 0.24 0.63
 13 -2 1 0.29 0.67
 13 -2 1 -0.04 0.56
 -13 2 -2 1.21 0.74
 -13 2 -2 2.04 0.85
 -13 2 -2 1.41 0.65
 -13 2 -2 0.9 0.69
 -13 2 -2 2.24 0.83
 -13 2 -2 0.75 0.69
 13 -2 2 0.37 0.49
 13 -2 2 1.23 0.66
 13 -2 2 2.28 0.66
 13 -2 2 0.28 0.81
 13 -2 2 1.98 0.71
 -13 2 -3 15.4 1.53
 -13 2 -3 13.56 1.22
 -13 2 -3 13.99 1.94
 -13 2 -3 13.79 0.85
 -13 2 -3 11.67 1.12
 -13 2 -3 10.7 1.16
 -13 2 -3 13.63 1.37
 13 -2 3 15.43 1.32
 13 -2 3 14.37 1.25
 13 -2 3 12.85 0.97
 13 -2 3 11.72 1.33
 13 -2 3 12.08 1.44
 -13 2 -4 1.21 0.94
 -13 2 -4 1.81 0.92
 -13 2 -4 1.04 1.1
 -13 2 -4 1.72 0.76
 -13 2 -4 0.55 1.26
 -13 2 -4 1.62 0.73
 13 -2 4 3.21 0.86
 13 -2 4 1.66 0.95
 13 -2 4 1.95 0.96
 13 -2 4 1.97 0.69
 13 -2 4 0.79 0.8
 -12 2 7 6.86 1.27
 -12 2 7 9.15 1.22
 -12 2 7 8.15 1.23
 12 -2 -7 6.15 1.21
 12 -2 -7 5.72 1.19
 12 -2 -7 4.58 1.25
 -12 2 6 -0.56 0.83
 -12 2 6 0.37 0.85
 -12 2 6 -0.4 0.89
 12 -2 -6 0.37 0.62
 12 -2 -6 0.53 0.85
 12 -2 -6 -0.02 0.87
 12 -2 -6 0.49 0.83
 -12 2 5 3.05 0.82
 -12 2 5 4.76 0.86
 -12 2 5 4.09 0.48
 -12 2 5 3.54 0.67
 -12 2 5 4.1 0.79
 12 -2 -5 2.91 0.82
 12 -2 -5 4.06 0.88
 12 -2 -5 2.54 0.74
 12 -2 -5 2.07 0.68
 -12 2 4 5.31 0.79
 -12 2 4 3.81 0.72
 -12 2 4 4.49 0.78
 -12 2 4 5.2 0.75
 12 -2 -4 4.78 0.83
 12 -2 -4 5.01 0.81
 12 -2 -4 4.64 0.76
 -12 2 3 3.68 0.72
 -12 2 3 2.59 0.64
 -12 2 3 3.11 0.64
 -12 2 3 2.7 0.69
 12 -2 -3 3.28 0.39
 12 -2 -3 2.82 0.66
 12 -2 -3 3.16 0.68
 12 -2 -3 4.96 0.75
 12 -2 -3 3.7 0.67
 -12 2 2 11.91 1
 -12 2 2 10.52 0.92
 -12 2 2 11.94 0.97
 -12 2 2 10.84 0.97
 12 -2 -2 9.46 0.99
 12 -2 -2 11.14 1
 12 -2 -2 11.61 0.96
 12 -2 -2 11.7 0.96
 12 -2 -2 10.22 1.04
 -12 2 1 0.05 0.49
 -12 2 1 0.09 0.55
 -12 2 1 0.11 0.4
 -12 2 1 0.09 0.5
 -12 2 1 0.81 0.56
 12 -2 -1 0.59 0.55
 12 -2 -1 0.26 0.46
 12 -2 -1 -0.16 0.48
 12 -2 -1 0.27 0.58
 -12 2 0 2.23 0.58
 -12 2 0 1.16 0.54
 -12 2 0 2.06 0.6
 -12 2 0 1.69 0.59
 -12 2 0 2.24 0.54
 -12 2 0 2.64 0.62
 12 -2 0 1.81 0.64
 12 -2 0 1.34 0.57
 12 -2 0 2.05 0.62
 -12 2 -1 38.03 1.41
 -12 2 -1 39.03 1.65
 -12 2 -1 36.23 1.47
 -12 2 -1 37.64 1.42
 -12 2 -1 36.71 1.4
 -12 2 -1 38.73 1.29
 12 -2 1 38.24 1.41
 12 -2 1 35.11 1.31
 12 -2 1 37.67 1.37
 12 -2 1 36.79 1.41
 -12 2 -2 13.07 0.99
 -12 2 -2 11.66 0.95
 -12 2 -2 11.9 1.13
 -12 2 -2 11.09 1.09
 -12 2 -2 13.59 1.44
 -12 2 -2 11.77 0.95
 12 -2 2 14.64 1.07
 12 -2 2 13.8 0.98
 12 -2 2 11.14 0.82
 12 -2 2 12.54 1.08
 12 -2 2 11.62 0.97
 12 -2 2 12.81 1.15
 -12 2 -3 1.63 0.69
 -12 2 -3 1.45 0.78
 -12 2 -3 0.84 0.66
 -12 2 -3 2.09 0.66
 -12 2 -3 3.21 0.62
 -12 2 -3 1.35 0.42
 -12 2 -3 0.63 0.88
 12 -2 3 1.09 0.67
 12 -2 3 1.15 0.49
 12 -2 3 1.18 0.72
 12 -2 3 2.75 0.66
 12 -2 3 1.66 0.64
 -12 2 -4 1.12 0.85
 -12 2 -4 1.66 1.11
 -12 2 -4 3.28 0.77
 -12 2 -4 3.43 0.92
 -12 2 -4 3.48 0.73
 12 -2 4 2.67 0.63
 12 -2 4 2.79 0.87
 12 -2 4 3.1 0.71
 12 -2 4 2.61 0.88
 12 -2 4 2.88 0.77
 -12 2 -5 11.47 1.23
 -12 2 -5 8.91 1.56
 -12 2 -5 15.1 1.38
 -12 2 -5 16.05 1.76
 12 -2 5 15.3 1.45
 12 -2 5 12.13 1.51
 12 -2 5 13.27 1.34
 12 -2 5 14.15 1.69
 -11 2 7 0.64 0.95
 -11 2 7 0 0.94
 -11 2 7 1.35 0.95
 11 -2 -7 0.81 0.44
 11 -2 -7 0.09 0.83
 11 -2 -7 -0.37 1
 11 -2 -7 2.27 0.96
 11 -2 -7 0.18 0.95
 11 -2 -7 0.55 0.37
 -11 2 6 -0.51 0.78
 -11 2 6 -0.07 0.74
 -11 2 6 0.53 0.73
 11 -2 -6 -0.27 0.72
 11 -2 -6 -0.43 0.8
 11 -2 -6 0.16 0.82
 11 -2 -6 0.22 0.49
 11 -2 -6 0.39 0.75
 -11 2 5 19.62 1.18
 -11 2 5 21.3 1.26
 -11 2 5 20.44 1.27
 11 -2 -5 19.55 1.33
 11 -2 -5 19.39 1.07
 11 -2 -5 20.64 1.2
 11 -2 -5 19.91 1.22
 -11 2 4 22.61 1.18
 -11 2 4 19.48 1.12
 -11 2 4 20 0.62
 -11 2 4 22.63 1.2
 11 -2 -4 22.01 1.18
 11 -2 -4 21.87 1.17
 11 -2 -4 22.28 1.24
 -11 2 3 2.36 0.58
 -11 2 3 2.56 0.57
 -11 2 3 2.25 0.56
 -11 2 3 3.82 0.64
 11 -2 -3 2.72 0.32
 11 -2 -3 2.45 0.58
 11 -2 -3 3.04 0.6
 11 -2 -3 3.66 0.63
 -11 2 2 1.03 0.5
 -11 2 2 1.36 0.54
 -11 2 2 1.67 0.54
 -11 2 2 1.04 0.5
 11 -2 -2 0.82 0.54
 11 -2 -2 1.07 0.49
 11 -2 -2 0.33 0.52
 11 -2 -2 2.13 0.61
 11 -2 -2 1.4 0.55
 -11 2 1 49.32 1.4
 -11 2 1 51.02 1.5
 -11 2 1 47.69 1.49
 -11 2 1 50.71 1.42
 -11 2 1 50.47 1.5
 11 -2 -1 47.67 1.48
 11 -2 -1 50.06 1.5
 11 -2 -1 48.37 1.5
 11 -2 -1 49.28 1.34
 -11 2 0 14.94 0.86
 -11 2 0 17.09 0.96
 -11 2 0 13.03 0.91
 -11 2 0 15.06 0.97
 -11 2 0 17.11 0.98
 -11 2 0 17.57 1.02
 11 -2 0 15.01 0.95
 11 -2 0 15.18 0.99
 11 -2 0 17.2 0.96
 -11 2 -1 14.7 1.02
 -11 2 -1 12.88 0.93
 -11 2 -1 13.62 0.86
 -11 2 -1 14.36 0.94
 -11 2 -1 14.99 1.13
 -11 2 -1 15.69 0.98
 11 -2 1 13.88 0.95
 11 -2 1 13.49 0.93
 11 -2 1 14.71 0.92
 11 -2 1 14.83 0.95
 -11 2 -2 0.4 0.49
 -11 2 -2 -0.41 0.62
 -11 2 -2 -0.45 0.51
 -11 2 -2 0.14 0.6
 -11 2 -2 -0.46 0.44
 -11 2 -2 -0.45 0.46
 11 -2 2 -0.55 0.5
 11 -2 2 0.39 0.39
 11 -2 2 0.02 0.5
 11 -2 2 0.68 0.5
 11 -2 2 -0.05 0.45
 -11 2 -3 3.89 0.89
 -11 2 -3 3.8 0.77
 -11 2 -3 4.75 0.73
 -11 2 -3 2.49 0.63
 -11 2 -3 3.54 0.62
 -11 2 -3 4.12 0.43
 11 -2 3 3.9 0.52
 11 -2 3 4.79 0.72
 11 -2 3 3.29 0.72
 11 -2 3 4.75 0.72
 11 -2 3 3.39 0.63
 -11 2 -4 0.76 0.61
 -11 2 -4 -0.48 0.89
 -11 2 -4 -0.7 0.73
 -11 2 -4 0.57 0.71
 -11 2 -4 -0.94 0.52
 11 -2 4 -0.27 0.52
 11 -2 4 0.73 0.54
 11 -2 4 0 0.7
 11 -2 4 0.75 0.62
 11 -2 4 0.11 0.7
 -11 2 -5 11.95 1.22
 -11 2 -5 9.88 1.1
 -11 2 -5 10.77 1.23
 -11 2 -5 11.5 0.99
 -11 2 -5 12.7 1.96
 11 -2 5 10.46 1.26
 11 -2 5 11.34 1.24
 11 -2 5 11.56 1.17
 11 -2 5 11.45 1.13
 11 -2 5 13.76 1.2
 -11 2 -6 -1.01 1.1
 11 -2 6 0.35 0.88
 -10 2 8 -0.07 1.25
 -10 2 8 -0.19 1.06
 -10 2 8 -0.41 1.03
 10 -2 -8 -0.64 1.08
 10 -2 -8 1.09 1.15
 -10 2 7 21.61 1.53
 -10 2 7 19.77 1.49
 -10 2 7 22.1 1.5
 10 -2 -7 19.53 1.56
 10 -2 -7 25.9 1.43
 10 -2 -7 19.6 1.25
 10 -2 -7 22.56 1.62
 10 -2 -7 20.78 1.51
 -10 2 6 2.25 0.74
 -10 2 6 2.17 0.7
 -10 2 6 3.29 0.73
 10 -2 -6 2.31 0.41
 10 -2 -6 2.23 0.4
 10 -2 -6 3.45 0.81
 10 -2 -6 1.46 0.44
 10 -2 -6 2.99 0.76
 10 -2 -6 3.2 0.72
 10 -2 -6 2.3 0.72
 -10 2 5 1.44 0.59
 -10 2 5 0.66 0.56
 -10 2 5 0.62 0.56
 10 -2 -5 1.09 0.57
 10 -2 -5 0.53 0.62
 10 -2 -5 0.74 0.46
 10 -2 -5 0.34 0.59
 10 -2 -5 1.27 0.6
 -10 2 4 2.32 0.55
 -10 2 4 2.31 0.61
 -10 2 4 2.28 0.61
 10 -2 -4 2.57 0.57
 10 -2 -4 2.73 0.59
 10 -2 -4 2.63 0.61
 -10 2 3 7.7 0.79
 -10 2 3 8.19 0.85
 -10 2 3 9.45 0.76
 -10 2 3 9.31 0.79
 10 -2 -3 8.72 0.87
 10 -2 -3 8.93 0.41
 10 -2 -3 10.24 0.83
 10 -2 -3 8.88 0.81
 -10 2 2 1.36 0.45
 -10 2 2 1.75 0.49
 -10 2 2 1.46 0.49
 -10 2 2 0.75 0.45
 10 -2 -2 1.05 0.52
 10 -2 -2 2.18 0.49
 10 -2 -2 2.26 0.5
 10 -2 -2 1.02 0.43
 -10 2 1 22.79 1.02
 -10 2 1 22.16 0.94
 -10 2 1 23.47 0.96
 -10 2 1 22.75 0.9
 -10 2 1 22.44 0.93
 10 -2 -1 23.82 0.91
 10 -2 -1 22.07 0.93
 10 -2 -1 23.56 0.98
 10 -2 -1 22.32 1.03
 -10 2 0 9.05 0.8
 -10 2 0 8.63 0.79
 -10 2 0 9.05 0.76
 -10 2 0 7.75 0.74
 -10 2 0 8.72 0.82
 -10 2 0 7.68 0.69
 10 -2 0 7.46 0.78
 10 -2 0 8.39 0.75
 10 -2 0 8.48 0.74
 10 -2 0 8.61 0.78
 -10 2 -1 0.47 0.48
 -10 2 -1 0.09 0.45
 -10 2 -1 0.42 0.42
 -10 2 -1 -0.05 0.44
 -10 2 -1 -0.12 0.4
 -10 2 -1 0.18 0.45
 10 -2 1 0.08 0.43
 10 -2 1 0.64 0.4
 10 -2 1 0.41 0.41
 10 -2 1 -0.36 0.41
 -10 2 -2 5.7 0.68
 -10 2 -2 5.33 0.76
 -10 2 -2 5.1 0.58
 -10 2 -2 6.27 0.78
 -10 2 -2 4.42 0.63
 -10 2 -2 4.36 0.6
 10 -2 2 5.26 0.63
 10 -2 2 4.92 0.65
 10 -2 2 5.55 0.65
 10 -2 2 5.49 0.7
 10 -2 2 5.91 0.65
 -10 2 -3 29.14 1.2
 -10 2 -3 27.17 1.26
 -10 2 -3 34.2 1.69
 -10 2 -3 31.8 1.29
 -10 2 -3 32.68 0.89
 -10 2 -3 30.59 1.28
 10 -2 3 32.26 1.28
 10 -2 3 31.32 1.24
 10 -2 3 33.33 1.31
 10 -2 3 30.7 1.06
 10 -2 3 30.8 1.27
 -10 2 -4 -1.03 0.5
 -10 2 -4 0.98 0.63
 -10 2 -4 -0.28 0.74
 -10 2 -4 -0.69 0.47
 -10 2 -4 -0.12 0.63
 10 -2 4 -0.42 0.46
 10 -2 4 -0.6 0.58
 10 -2 4 0.04 0.52
 10 -2 4 0.18 0.58
 10 -2 4 -0.07 0.47
 -10 2 -5 1.21 0.8
 -10 2 -5 0.7 0.54
 -10 2 -5 1.01 0.63
 -10 2 -5 0.81 0.76
 10 -2 5 0.92 0.77
 10 -2 5 0.44 0.63
 10 -2 5 1.07 0.54
 10 -2 5 0.71 0.64
 10 -2 5 0.13 0.76
 10 -2 5 2.42 0.62
 -10 2 -6 0.22 0.92
 -10 2 -6 -1.02 0.92
 -10 2 -6 0.38 0.73
 10 -2 6 0.35 0.87
 10 -2 6 0.49 0.82
 10 -2 6 1.79 0.69
 10 -2 6 1.7 0.73
 10 -2 6 -0.01 0.94
 -9 2 8 1.41 1.08
 -9 2 8 1.18 1.05
 9 -2 -8 -0.51 0.95
 9 -2 -8 0.32 1.06
 9 -2 -8 -0.91 0.88
 -9 2 7 0.69 0.72
 -9 2 7 0.31 0.74
 -9 2 7 -0.15 0.77
 -9 2 7 0.48 0.82
 9 -2 -7 -0.14 0.73
 9 -2 -7 0.78 0.83
 9 -2 -7 0.99 0.68
 9 -2 -7 1.19 0.7
 9 -2 -7 -0.41 0.63
 -9 2 6 0.11 0.57
 -9 2 6 -0.15 0.58
 -9 2 6 0.46 0.59
 9 -2 -6 -0.52 0.52
 9 -2 -6 -0.16 0.63
 9 -2 -6 -0.39 0.46
 9 -2 -6 -0.45 0.58
 9 -2 -6 0.19 0.63
 -9 2 5 0.75 0.53
 -9 2 5 -0.01 0.47
 -9 2 5 0.36 0.53
 9 -2 -5 0.42 0.35
 9 -2 -5 0.65 0.54
 9 -2 -5 0.52 0.53
 9 -2 -5 -0.2 0.51
 9 -2 -5 0.55 0.3
 9 -2 -5 0.02 0.37
 9 -2 -5 0.55 0.52
 -9 2 4 1.37 0.47
 -9 2 4 1.87 0.49
 -9 2 4 1.73 0.47
 9 -2 -4 1.25 0.52
 9 -2 -4 1.73 0.22
 9 -2 -4 1.51 0.48
 9 -2 -4 1.56 0.5
 -9 2 3 44.35 1.22
 -9 2 3 46.41 1.35
 -9 2 3 46.52 1.31
 -9 2 3 44.76 1.27
 9 -2 -3 45.8 1.33
 9 -2 -3 44.75 1.29
 9 -2 -3 45.17 1.29
 -9 2 2 0.93 0.4
 -9 2 2 1.46 0.42
 -9 2 2 0.49 0.39
 -9 2 2 1.1 0.4
 9 -2 -2 0.41 0.39
 9 -2 -2 0.71 0.24
 9 -2 -2 1.25 0.42
 9 -2 -2 0.69 0.39
 9 -2 -2 0.64 0.42
 -9 2 1 3.75 0.53
 -9 2 1 3.59 0.48
 -9 2 1 4.18 0.49
 -9 2 1 3.55 0.5
 -9 2 1 3.93 0.53
 9 -2 -1 4.03 0.54
 9 -2 -1 4.09 0.47
 9 -2 -1 3.91 0.58
 9 -2 -1 3.89 0.49
 9 -2 -1 4.17 0.53
 -9 2 0 20.13 0.79
 -9 2 0 20.34 0.86
 -9 2 0 21.43 0.91
 -9 2 0 20.5 0.89
 -9 2 0 21 0.92
 -9 2 0 21.11 0.9
 9 -2 0 20.07 0.86
 9 -2 0 20.06 0.88
 9 -2 0 20.36 0.88
 9 -2 0 20.91 0.92
 -9 2 -1 47.53 1.36
 -9 2 -1 46.71 1.34
 -9 2 -1 45.49 1.16
 -9 2 -1 46.38 1.55
 -9 2 -1 46.46 1.34
 -9 2 -1 46.66 1.34
 9 -2 1 46.65 1.35
 9 -2 1 46.55 1.31
 9 -2 1 45.91 1.23
 9 -2 1 45.67 1.33
 -9 2 -2 0.03 0.42
 -9 2 -2 0.07 0.37
 -9 2 -2 -0.14 0.47
 -9 2 -2 -0.27 0.42
 -9 2 -2 0.21 0.45
 9 -2 2 0.26 0.32
 9 -2 2 -0.08 0.37
 9 -2 2 -0.01 0.37
 9 -2 2 -0.32 0.36
 9 -2 2 0.21 0.42
 -9 2 -3 0.69 0.58
 -9 2 -3 1.32 0.44
 -9 2 -3 0.39 0.45
 -9 2 -3 -0.1 0.42
 -9 2 -3 1.16 0.52
 -9 2 -3 1.25 0.3
 9 -2 3 1.01 0.5
 9 -2 3 0.88 0.38
 9 -2 3 1.52 0.48
 9 -2 3 0.64 0.44
 9 -2 3 0.42 0.44
 -9 2 -4 0.71 0.67
 -9 2 -4 2.26 0.56
 -9 2 -4 1.39 0.51
 -9 2 -4 1.67 0.56
 -9 2 -4 1.55 0.58
 9 -2 4 1.54 0.56
 9 -2 4 1.25 0.56
 9 -2 4 0.8 0.46
 9 -2 4 1.4 0.55
 9 -2 4 0.79 0.52
 9 -2 4 1.53 0.49
 -9 2 -5 9.32 0.94
 -9 2 -5 7.71 0.79
 -9 2 -5 5.67 0.96
 -9 2 -5 8.58 0.91
 9 -2 5 8.4 1.02
 9 -2 5 8.75 0.91
 9 -2 5 7.74 0.86
 9 -2 5 8.41 0.86
 9 -2 5 8.78 1.06
 9 -2 5 10.21 0.9
 -9 2 -6 -1.4 0.7
 -9 2 -6 0.38 0.61
 -9 2 -6 1.08 0.82
 -9 2 -6 1.69 0.74
 9 -2 6 -0.61 0.63
 9 -2 6 0.17 0.76
 9 -2 6 0.69 0.65
 9 -2 6 -0.14 0.82
 9 -2 6 0.05 0.74
 -9 2 -7 3.67 1.12
 -9 2 -7 1.31 1.1
 9 -2 7 2.19 1.12
 9 -2 7 2.31 1.03
 -8 2 8 -0.1 0.93
 -8 2 8 1.32 1.04
 8 -2 -8 0.24 0.91
 8 -2 -8 -0.72 0.94
 8 -2 -8 -1.58 0.87
 8 -2 -8 -1.13 0.87
 8 -2 -8 -1.24 0.67
 -8 2 7 4.59 0.78
 -8 2 7 3.33 0.91
 8 -2 -7 2.9 0.73
 8 -2 -7 2.99 0.74
 8 -2 -7 3.15 0.76
 8 -2 -7 3.26 0.76
 -8 2 6 2.22 0.6
 -8 2 6 2.53 0.66
 8 -2 -6 3.78 0.64
 8 -2 -6 3.03 0.66
 8 -2 -6 4.36 0.72
 8 -2 -6 3.21 0.6
 -8 2 5 14.23 0.94
 -8 2 5 13.46 0.86
 -8 2 5 13.22 0.88
 8 -2 -5 14.38 0.99
 8 -2 -5 14.25 0.62
 8 -2 -5 14.94 0.89
 8 -2 -5 11.19 0.9
 8 -2 -5 15.57 0.95
 8 -2 -5 13.77 0.92
 -8 2 4 0.53 0.4
 -8 2 4 0.49 0.38
 -8 2 4 0.02 0.36
 8 -2 -4 0.1 0.38
 8 -2 -4 0.07 0.43
 8 -2 -4 -0.08 0.24
 8 -2 -4 0.11 0.39
 8 -2 -4 0.14 0.41
 -8 2 3 26.58 0.9
 -8 2 3 26.5 0.96
 -8 2 3 26.68 0.94
 8 -2 -3 25.73 0.97
 8 -2 -3 25.89 0.7
 8 -2 -3 25.53 0.9
 8 -2 -3 26.84 0.97
 -8 2 2 25.74 0.83
 -8 2 2 25.08 0.9
 -8 2 2 24.22 0.87
 -8 2 2 24.55 0.94
 8 -2 -2 24.3 0.71
 8 -2 -2 25.3 0.91
 8 -2 -2 25.4 0.87
 8 -2 -2 24.59 0.88
 -8 2 1 41.08 1.17
 -8 2 1 39.48 1.09
 -8 2 1 38.96 1.03
 -8 2 1 38.85 1.13
 -8 2 1 39.05 1.13
 8 -2 -1 40.05 1.1
 8 -2 -1 40.3 1.05
 8 -2 -1 37.65 1.14
 8 -2 -1 39.54 1.12
 -8 2 0 0.21 0.33
 -8 2 0 0.08 0.31
 -8 2 0 -0.38 0.32
 -8 2 0 -0.23 0.33
 -8 2 0 0.11 0.35
 -8 2 0 0.16 0.29
 8 -2 0 0.29 0.34
 8 -2 0 0.23 0.32
 8 -2 0 0 0.32
 8 -2 0 0.01 0.32
 8 -2 0 0.39 0.32
 -8 2 -1 5.31 0.55
 -8 2 -1 5.88 0.64
 -8 2 -1 4.99 0.74
 -8 2 -1 6.4 0.62
 -8 2 -1 5.89 0.52
 -8 2 -1 5.82 0.63
 8 -2 1 6.86 0.66
 8 -2 1 5.25 0.58
 8 -2 1 5.75 0.63
 8 -2 1 5.8 0.55
 -8 2 -2 7.09 0.86
 -8 2 -2 7.61 0.66
 -8 2 -2 7.44 0.71
 -8 2 -2 6.77 0.69
 -8 2 -2 6.79 0.69
 8 -2 2 7.31 0.71
 8 -2 2 7.58 0.56
 8 -2 2 7.1 0.55
 8 -2 2 7.75 0.65
 8 -2 2 7.76 0.68
 -8 2 -3 10.84 0.82
 -8 2 -3 10.66 1.05
 -8 2 -3 10.6 0.79
 -8 2 -3 11.17 0.52
 -8 2 -3 9.09 0.8
 -8 2 -3 10.67 0.79
 8 -2 3 10.39 0.69
 8 -2 3 10.24 0.79
 8 -2 3 10.23 0.77
 8 -2 3 10.06 0.8
 8 -2 3 10.72 0.81
 -8 2 -4 0.44 0.5
 -8 2 -4 0.01 0.43
 -8 2 -4 0.24 0.4
 -8 2 -4 -0.49 0.42
 -8 2 -4 -0.63 0.48
 8 -2 4 0.65 0.51
 8 -2 4 0.29 0.4
 8 -2 4 0.23 0.44
 8 -2 4 0.56 0.44
 8 -2 4 0.39 0.42
 8 -2 4 0.16 0.46
 -8 2 -5 8.64 1.1
 -8 2 -5 9.14 0.99
 -8 2 -5 10.34 0.95
 -8 2 -5 11.8 1.04
 8 -2 5 10.74 0.98
 8 -2 5 9.31 0.77
 8 -2 5 8.59 0.98
 8 -2 5 10.65 0.99
 8 -2 5 11.54 0.92
 8 -2 5 11.28 1.02
 -8 2 -6 -0.39 0.67
 -8 2 -6 0.82 0.56
 -8 2 -6 1.54 0.68
 8 -2 6 -0.78 0.54
 8 -2 6 -0.16 0.71
 8 -2 6 1.62 0.68
 8 -2 6 0.1 0.65
 -8 2 -7 0.03 0.94
 -8 2 -7 1.42 0.78
 -8 2 -7 -0.86 0.93
 8 -2 7 -2 0.85
 8 -2 7 -0.06 0.96
 8 -2 7 2.26 0.71
 8 -2 7 1.09 0.9
 -7 2 8 -1.07 0.87
 -7 2 8 -0.66 0.87
 7 -2 -8 -0.96 0.9
 7 -2 -8 -0.46 0.88
 7 -2 -8 -1.26 0.6
 7 -2 -8 -1.92 0.81
 7 -2 -8 1.19 0.9
 -7 2 7 0.59 0.74
 -7 2 7 -1 0.65
 7 -2 -7 0.23 0.59
 7 -2 -7 0.65 0.71
 7 -2 -7 -0.03 0.7
 -7 2 6 -0.17 0.5
 -7 2 6 -0.1 0.5
 7 -2 -6 0.42 0.48
 7 -2 -6 0.05 0.53
 7 -2 -6 0.53 0.52
 7 -2 -6 0.84 0.55
 -7 2 5 4.79 0.61
 -7 2 5 5.07 0.54
 7 -2 -5 4.93 0.62
 7 -2 -5 4.11 0.35
 7 -2 -5 4.64 0.56
 7 -2 -5 4.49 0.57
 -7 2 4 4.18 0.49
 -7 2 4 4.41 0.47
 -7 2 4 4.32 0.51
 7 -2 -4 5.58 0.6
 7 -2 -4 4.38 0.52
 7 -2 -4 4.24 0.53
 -7 2 3 3.1 0.41
 -7 2 3 3.61 0.45
 -7 2 3 3.41 0.43
 7 -2 -3 3.32 0.45
 7 -2 -3 3.64 0.46
 7 -2 -3 3.36 0.38
 7 -2 -3 3.07 0.44
 7 -2 -3 3.11 0.4
 -7 2 2 14.11 0.68
 -7 2 2 14.01 0.65
 -7 2 2 14.25 0.69
 -7 2 2 14.45 0.64
 7 -2 -2 14.16 0.65
 7 -2 -2 15.24 0.67
 7 -2 -2 13.19 0.69
 7 -2 -2 13.39 0.51
 -7 2 1 0.84 0.33
 -7 2 1 0.58 0.3
 -7 2 1 0.63 0.32
 -7 2 1 0.58 0.25
 -7 2 1 1.08 0.35
 7 -2 -1 0.92 0.26
 7 -2 -1 0.86 0.31
 7 -2 -1 0.83 0.34
 7 -2 -1 0.94 0.32
 -7 2 0 5.17 0.54
 -7 2 0 4.66 0.52
 -7 2 0 4.74 0.46
 -7 2 0 4.72 0.48
 -7 2 0 4.41 0.55
 7 -2 0 4.37 0.52
 7 -2 0 4.66 0.56
 7 -2 0 4.88 0.6
 7 -2 0 4.46 0.53
 7 -2 0 4.68 0.54
 -7 2 -1 46.36 1.42
 -7 2 -1 49.02 1.22
 -7 2 -1 45.14 1.2
 -7 2 -1 47.15 1.21
 -7 2 -1 46.71 1.23
 -7 2 -1 44.65 1.04
 7 -2 1 46.42 1.23
 7 -2 1 46.94 1.21
 7 -2 1 44.47 1.15
 7 -2 1 47.27 1.44
 7 -2 1 46.31 1.08
 -7 2 -2 2.52 0.43
 -7 2 -2 2.08 0.43
 -7 2 -2 2.7 0.47
 -7 2 -2 2.9 0.42
 -7 2 -2 2.45 0.5
 7 -2 2 2.13 0.42
 7 -2 2 3.18 0.47
 7 -2 2 2.5 0.34
 7 -2 2 2.75 0.34
 7 -2 2 2.57 0.41
 -7 2 -3 46.98 0.99
 -7 2 -3 46.89 1.26
 -7 2 -3 45.49 1.34
 -7 2 -3 46.41 1.26
 -7 2 -3 47.11 1.33
 -7 2 -3 43.79 1.63
 7 -2 3 45.91 1.26
 7 -2 3 45.39 1.31
 7 -2 3 46.39 1.32
 7 -2 3 45.06 1.15
 7 -2 3 45.43 1.22
 -7 2 -4 5.24 0.66
 -7 2 -4 4.65 0.56
 -7 2 -4 5.33 0.6
 -7 2 -4 4.59 0.59
 -7 2 -4 4.1 0.71
 7 -2 4 4.83 0.62
 7 -2 4 4.76 0.52
 7 -2 4 4.83 0.58
 7 -2 4 4.27 0.59
 7 -2 4 4.04 0.52
 7 -2 4 4.64 0.6
 -7 2 -5 6.78 0.73
 -7 2 -5 7.54 0.92
 -7 2 -5 5.59 0.66
 -7 2 -5 6.25 0.87
 7 -2 5 7.45 0.93
 7 -2 5 6.06 0.68
 7 -2 5 6.39 0.71
 7 -2 5 7.23 0.79
 7 -2 5 6.79 0.62
 7 -2 5 7.9 0.78
 -7 2 -6 0.06 0.5
 -7 2 -6 0.67 0.66
 -7 2 -6 -0.79 0.62
 -7 2 -6 1.51 0.69
 -7 2 -6 0.62 0.57
 7 -2 6 0.43 0.49
 7 -2 6 1.57 0.66
 7 -2 6 0.74 0.61
 7 -2 6 2.33 0.53
 7 -2 6 1.71 0.69
 -7 2 -7 2.69 0.69
 -7 2 -7 2.58 0.73
 -7 2 -7 1.02 0.84
 -7 2 -7 1.39 0.86
 7 -2 7 1.18 0.84
 7 -2 7 1.8 0.87
 7 -2 7 2.86 0.94
 7 -2 7 2.25 0.62
 7 -2 7 0.84 0.66
 -6 2 9 2 1.12
 6 -2 -9 1.7 1.01
 6 -2 -9 1.77 1.2
 -6 2 8 0.9 0.59
 -6 2 8 0.84 0.82
 -6 2 8 1.52 0.87
 -6 2 8 0.2 0.76
 6 -2 -8 -0.41 0.89
 6 -2 -8 2.39 0.84
 6 -2 -8 -0.23 0.64
 6 -2 -8 2.01 0.83
 6 -2 -8 0.88 0.8
 -6 2 7 6.45 0.76
 -6 2 7 7.24 0.89
 -6 2 7 7.02 0.83
 6 -2 -7 8.42 0.87
 6 -2 -7 5.69 0.86
 6 -2 -7 8.33 0.98
 6 -2 -7 7.08 0.84
 -6 2 6 1.92 0.53
 -6 2 6 2.36 0.61
 -6 2 6 2.39 0.54
 6 -2 -6 1.93 0.62
 6 -2 -6 1.16 0.51
 6 -2 -6 2.76 0.6
 6 -2 -6 1.83 0.55
 -6 2 5 2.93 0.5
 -6 2 5 4.04 0.56
 -6 2 5 3.46 0.46
 6 -2 -5 3.68 0.54
 6 -2 -5 2.19 0.46
 6 -2 -5 4.04 0.54
 -6 2 4 7.64 0.58
 -6 2 4 7.33 0.58
 6 -2 -4 7.66 0.65
 6 -2 -4 7.87 0.62
 6 -2 -4 8.33 0.6
 6 -2 -4 6.65 0.42
 -6 2 3 -0.1 0.29
 -6 2 3 0.34 0.31
 -6 2 3 -0.19 0.26
 6 -2 -3 0.22 0.33
 6 -2 -3 0.28 0.34
 6 -2 -3 0.31 0.29
 -6 2 2 0.42 0.3
 -6 2 2 0.66 0.28
 -6 2 2 0.64 0.32
 6 -2 -2 0.71 0.14
 6 -2 -2 0.79 0.34
 6 -2 -2 0.6 0.19
 6 -2 -2 0.63 0.31
 6 -2 -2 1.22 0.34
 -6 2 1 82.59 1.66
 -6 2 1 81.56 1.65
 -6 2 1 79.79 1.52
 -6 2 1 82.31 1.77
 -6 2 1 82.34 1.63
 6 -2 -1 83.54 1.65
 6 -2 -1 83.48 1.67
 6 -2 -1 80.65 1.55
 6 -2 -1 82.21 1.76
 -6 2 0 34.61 0.97
 -6 2 0 35.29 0.97
 -6 2 0 34.93 1.03
 -6 2 0 33.76 0.83
 -6 2 0 34.44 0.98
 6 -2 0 34.55 1.04
 6 -2 0 36.17 0.96
 6 -2 0 33.35 0.91
 6 -2 0 34.46 1
 -6 2 -1 150.28 2.7
 -6 2 -1 152.29 2.64
 -6 2 -1 145.59 2.67
 -6 2 -1 148.22 3.22
 -6 2 -1 149.02 2.59
 6 -2 1 145.87 2.58
 6 -2 1 150.4 2.68
 6 -2 1 146.73 2.55
 6 -2 1 146.9 3.22
 6 -2 1 145.29 2.68
 -6 2 -2 -0.26 0.34
 -6 2 -2 0.16 0.38
 -6 2 -2 0.52 0.32
 -6 2 -2 0.07 0.33
 -6 2 -2 -0.19 0.26
 6 -2 2 0.11 0.3
 6 -2 2 0.04 0.34
 6 -2 2 -0.1 0.25
 6 -2 2 0.13 0.36
 6 -2 2 -0.32 0.31
 -6 2 -3 49.51 1.35
 -6 2 -3 50.04 1.25
 -6 2 -3 51.73 1.05
 -6 2 -3 51.25 1.28
 -6 2 -3 51.16 1.7
 -6 2 -3 51.6 1.38
 6 -2 3 50.23 1.27
 6 -2 3 52.05 1.38
 6 -2 3 50.96 1.26
 6 -2 3 52.86 1.39
 6 -2 3 50.77 1.21
 -6 2 -4 16.78 0.93
 -6 2 -4 15.43 0.5
 -6 2 -4 15.72 0.81
 -6 2 -4 15.8 1.13
 -6 2 -4 14.15 0.8
 6 -2 4 13.04 0.78
 6 -2 4 15.59 0.67
 6 -2 4 14.6 0.82
 6 -2 4 17.26 0.83
 6 -2 4 16.56 0.91
 6 -2 4 16.66 0.81
 -6 2 -5 0.61 0.25
 -6 2 -5 1.08 0.49
 -6 2 -5 0.23 0.56
 -6 2 -5 0.47 0.48
 -6 2 -5 -0.47 0.37
 6 -2 5 0.38 0.29
 6 -2 5 0.29 0.38
 6 -2 5 1.37 0.47
 6 -2 5 0.49 0.44
 6 -2 5 0.04 0.45
 6 -2 5 0.44 0.5
 -6 2 -6 -0.83 0.57
 -6 2 -6 0.46 0.26
 -6 2 -6 1.08 0.59
 -6 2 -6 0.07 0.46
 -6 2 -6 -0.48 0.52
 -6 2 -6 0.26 0.6
 6 -2 6 0.76 0.61
 6 -2 6 0.02 0.49
 6 -2 6 -0.26 0.48
 6 -2 6 1.12 0.54
 6 -2 6 0.08 0.61
 -6 2 -7 0.62 0.75
 -6 2 -7 2.46 0.58
 -6 2 -7 -0.37 0.7
 -6 2 -7 -0.04 0.64
 6 -2 7 0.41 0.54
 6 -2 7 0.47 0.65
 6 -2 7 0.26 0.81
 6 -2 7 0.49 0.8
 6 -2 7 0.09 0.56
 -6 2 -8 -0.98 0.88
 6 -2 8 0.05 1
 6 -2 8 0.78 1.14
 -5 2 9 -0.83 0.98
 -5 2 9 -2.6 1.1
 -5 2 9 -2.13 1.11
 5 -2 -9 -0.89 1.24
 5 -2 -9 -0.95 0.93
 5 -2 -9 0.7 1.06
 5 -2 -9 0.53 1.05
 -5 2 8 -1.31 0.57
 -5 2 8 0.23 0.74
 -5 2 8 1.29 0.71
 -5 2 8 0.23 0.8
 5 -2 -8 0.04 0.72
 5 -2 -8 0.55 0.77
 5 -2 -8 0.35 0.79
 5 -2 -8 -0.19 0.56
 5 -2 -8 -1.23 0.87
 -5 2 7 24.32 1.22
 -5 2 7 24 1.34
 -5 2 7 24.96 1.26
 -5 2 7 23.63 1.26
 5 -2 -7 22.97 1.22
 5 -2 -7 24.67 1.26
 5 -2 -7 25.01 1.63
 5 -2 -7 23.74 1.27
 5 -2 -7 24.92 1.27
 -5 2 6 5.14 0.61
 -5 2 6 5.35 0.63
 -5 2 6 5.95 0.69
 5 -2 -6 5.25 0.64
 5 -2 -6 5.49 0.66
 5 -2 -6 5.72 0.65
 5 -2 -6 5.83 0.74
 -5 2 5 -0.32 0.39
 -5 2 5 -0.49 0.36
 -5 2 5 0.58 0.36
 5 -2 -5 0.45 0.41
 5 -2 -5 0.12 0.39
 5 -2 -5 -0.2 0.4
 -5 2 4 1.99 0.33
 -5 2 4 1.4 0.39
 -5 2 4 1.95 0.37
 5 -2 -4 1.58 0.41
 5 -2 -4 1.62 0.36
 5 -2 -4 1.95 0.38
 5 -2 -4 1.8 0.24
 -5 2 3 202.06 3.38
 -5 2 3 195.21 3.11
 5 -2 -3 199.58 3.37
 5 -2 -3 199.17 3.25
 5 -2 -3 196.89 3.44
 -5 2 2 4.63 0.45
 -5 2 2 4.81 0.42
 -5 2 2 4.81 0.49
 5 -2 -2 4.74 0.4
 5 -2 -2 5.24 0.54
 5 -2 -2 4.31 0.45
 5 -2 -2 4.27 0.14
 5 -2 -2 5.04 0.38
 5 -2 -2 5.51 0.47
 -5 2 1 4.48 0.38
 -5 2 1 5.33 0.5
 -5 2 1 5.04 0.39
 -5 2 1 4.71 0.45
 -5 2 1 5 0.49
 5 -2 -1 5.09 0.42
 5 -2 -1 4.75 0.49
 5 -2 -1 4.51 0.46
 5 -2 -1 4.95 0.39
 -5 2 0 0.09 0.29
 -5 2 0 -0.04 0.3
 -5 2 0 0.03 0.22
 -5 2 0 -0.18 0.3
 -5 2 0 -0.26 0.24
 5 -2 0 0.02 0.3
 5 -2 0 0.24 0.29
 5 -2 0 -0.17 0.31
 5 -2 0 0.1 0.26
 -5 2 -1 119.85 2.21
 -5 2 -1 120.06 2.66
 -5 2 -1 119.08 2.19
 -5 2 -1 121.93 2.14
 -5 2 -1 120.37 2.11
 5 -2 1 120.95 2.07
 5 -2 1 121.85 2.67
 5 -2 1 115.99 2.2
 5 -2 1 118.33 2.18
 5 -2 1 120.66 2.11
 -5 2 -2 0.12 0.35
 -5 2 -2 0.04 0.19
 -5 2 -2 0.33 0.34
 -5 2 -2 0.04 0.28
 -5 2 -2 -0.01 0.33
 -5 2 -2 0.15 0.29
 5 -2 2 0.37 0.32
 5 -2 2 0.15 0.34
 5 -2 2 -0.1 0.23
 5 -2 2 0.11 0.29
 5 -2 2 0.73 0.44
 5 -2 2 0.07 0.26
 -5 2 -3 72.8 1.66
 -5 2 -3 72.09 1.3
 -5 2 -3 74.69 1.57
 -5 2 -3 74.86 1.64
 -5 2 -3 74.24 1.52
 -5 2 -3 75.12 2.09
 -5 2 -3 73.55 1.38
 5 -2 3 72.38 1.65
 5 -2 3 71.6 1.52
 5 -2 3 72.67 1.51
 5 -2 3 73.46 1.55
 5 -2 3 72.66 1.64
 -5 2 -4 2.16 0.42
 -5 2 -4 2.42 0.45
 -5 2 -4 2.16 0.24
 -5 2 -4 1.41 0.49
 -5 2 -4 2.2 0.48
 5 -2 4 1.81 0.44
 5 -2 4 1.86 0.42
 5 -2 4 2.03 0.45
 5 -2 4 2.46 0.45
 5 -2 4 1.83 0.39
 5 -2 4 1.63 0.29
 -5 2 -5 0.95 0.45
 -5 2 -5 1.37 0.53
 -5 2 -5 1.4 0.26
 -5 2 -5 1.02 0.6
 -5 2 -5 1.06 0.47
 -5 2 -5 1.29 0.46
 5 -2 5 1.21 0.44
 5 -2 5 1.83 0.45
 5 -2 5 0.81 0.45
 5 -2 5 0.99 0.44
 5 -2 5 1.11 0.49
 -5 2 -6 1.69 0.63
 -5 2 -6 3.98 0.63
 -5 2 -6 2.46 0.59
 -5 2 -6 3.32 0.33
 -5 2 -6 3.94 0.61
 -5 2 -6 2.63 0.63
 5 -2 6 3.25 0.66
 5 -2 6 3.96 0.64
 5 -2 6 2.75 0.62
 5 -2 6 3.7 0.55
 5 -2 6 4.39 0.59
 -5 2 -7 11.7 1.04
 -5 2 -7 11.71 0.57
 -5 2 -7 7.97 0.99
 -5 2 -7 10.47 1.18
 -5 2 -7 13.46 1.12
 5 -2 7 10.97 0.95
 5 -2 7 10.4 1.27
 5 -2 7 14.07 1.07
 5 -2 7 12.84 1.14
 5 -2 7 9.54 0.95
 -5 2 -8 3.27 0.92
 -5 2 -8 1.08 0.88
 -5 2 -8 -0.27 0.77
 5 -2 8 -0.97 0.91
 5 -2 8 -0.62 1.01
 5 -2 8 0.16 0.83
 -4 2 9 7.22 1.1
 -4 2 9 4.71 1.15
 4 -2 -9 6.33 1.21
 4 -2 -9 7.98 1.24
 4 -2 -9 6.39 1.1
 4 -2 -9 5.68 1.43
 -4 2 8 1.32 0.56
 -4 2 8 1.02 0.79
 -4 2 8 3.21 0.82
 -4 2 8 1.41 0.77
 4 -2 -8 2.36 0.76
 4 -2 -8 3.25 0.81
 4 -2 -8 1.96 0.73
 4 -2 -8 0.75 0.58
 4 -2 -8 0.88 0.94
 4 -2 -8 1.97 0.51
 -4 2 7 -0.19 0.54
 -4 2 7 -0.77 0.46
 -4 2 7 -0.32 0.54
 -4 2 7 0.04 0.5
 4 -2 -7 -0.93 0.51
 4 -2 -7 -0.47 0.52
 4 -2 -7 0.15 0.51
 4 -2 -7 0.62 0.73
 4 -2 -7 -0.19 0.48
 -4 2 6 2.3 0.52
 -4 2 6 2.42 0.55
 -4 2 6 3.07 0.57
 4 -2 -6 2.25 0.45
 4 -2 -6 2.02 0.5
 4 -2 -6 2.38 0.64
 4 -2 -6 1.76 0.55
 4 -2 -6 2.06 0.52
 -4 2 5 41.33 1.28
 -4 2 5 46.61 1.27
 -4 2 5 45.69 1.37
 4 -2 -5 43.05 1.3
 4 -2 -5 45.16 1.28
 -4 2 4 0.09 0.32
 -4 2 4 -0.02 0.26
 -4 2 4 -0.43 0.32
 4 -2 -4 0.28 0.34
 4 -2 -4 0.23 0.32
 4 -2 -4 0.16 0.32
 -4 2 3 35.75 1
 -4 2 3 36.71 0.98
 -4 2 3 36.26 0.84
 4 -2 -3 35.25 1
 4 -2 -3 36.43 0.95
 4 -2 -3 37.64 0.91
 -4 2 2 0.13 0.27
 -4 2 2 0.64 0.28
 4 -2 -2 0.16 0.29
 4 -2 -2 0.47 0.23
 4 -2 -2 0.65 0.28
 -4 2 1 15.95 0.6
 -4 2 1 15.62 0.48
 -4 2 1 16.13 0.58
 4 -2 -1 15.89 0.53
 4 -2 -1 15.93 0.53
 4 -2 -1 15.93 0.58
 4 -2 -1 15.06 0.56
 -4 2 0 10.3 0.57
 -4 2 0 10.91 0.55
 -4 2 0 10.35 0.55
 -4 2 0 10.17 0.41
 -4 2 0 11.29 0.58
 4 -2 0 10.6 0.52
 4 -2 0 10.87 0.58
 4 -2 0 9.8 0.52
 4 -2 0 11.52 0.56
 -4 2 -1 131.07 2.27
 -4 2 -1 130.68 2.17
 -4 2 -1 128.79 2.2
 -4 2 -1 131.23 2.8
 -4 2 -1 130.88 2.28
 4 -2 1 130.89 2.16
 4 -2 1 130.31 2.28
 4 -2 1 129.88 2.79
 4 -2 1 128.61 2.27
 4 -2 1 126.31 2.16
 -4 2 -2 17.99 0.61
 -4 2 -2 16.67 0.51
 -4 2 -2 16.93 0.9
 -4 2 -2 18.22 0.73
 -4 2 -2 17.07 0.69
 -4 2 -2 17.82 0.65
 4 -2 2 16.81 0.92
 4 -2 2 17.49 0.73
 4 -2 2 17.37 0.61
 4 -2 2 17.02 0.63
 4 -2 2 17.62 0.6
 4 -2 2 16.73 0.67
 -4 2 -3 2.59 0.42
 -4 2 -3 1.78 0.36
 -4 2 -3 1.73 0.4
 -4 2 -3 1.98 0.34
 -4 2 -3 1.65 0.19
 -4 2 -3 1.73 0.48
 4 -2 3 2.09 0.26
 4 -2 3 1.63 0.33
 4 -2 3 1.65 0.31
 4 -2 3 1.47 0.37
 4 -2 3 2.25 0.41
 4 -2 3 1.9 0.33
 -4 2 -4 1.92 0.38
 -4 2 -4 1.92 0.39
 -4 2 -4 1.61 0.51
 -4 2 -4 1.78 0.43
 -4 2 -4 1.99 0.45
 4 -2 4 1.24 0.36
 4 -2 4 2.14 0.38
 4 -2 4 1.83 0.23
 4 -2 4 1.79 0.4
 4 -2 4 2.07 0.41
 4 -2 4 1.67 0.42
 -4 2 -5 59.25 1.66
 -4 2 -5 70.18 1.73
 -4 2 -5 68.85 2.2
 -4 2 -5 70.79 1.75
 -4 2 -5 69.9 1.62
 -4 2 -5 72.92 1.71
 4 -2 5 69.47 1.68
 4 -2 5 67.62 1.45
 4 -2 5 61.9 1.68
 4 -2 5 69.07 1.65
 4 -2 5 69.04 1.73
 4 -2 5 69.06 1.59
 -4 2 -6 11.93 0.97
 -4 2 -6 11.77 0.95
 -4 2 -6 10.28 0.87
 -4 2 -6 8.5 1.14
 -4 2 -6 9.67 0.91
 4 -2 6 10.52 0.8
 4 -2 6 11.92 0.83
 4 -2 6 10.37 0.74
 4 -2 6 10.49 0.84
 4 -2 6 10.89 0.97
 4 -2 6 11.02 0.94
 -4 2 -7 0.04 0.61
 -4 2 -7 0.04 0.67
 -4 2 -7 -0.19 0.52
 -4 2 -7 0.62 0.57
 4 -2 7 0.05 0.54
 4 -2 7 0.28 0.69
 4 -2 7 0.26 0.6
 4 -2 7 1.09 0.68
 4 -2 7 0.58 0.51
 -4 2 -8 -0.25 0.95
 -4 2 -8 1.02 0.83
 -4 2 -8 -0.54 0.71
 -4 2 -8 -1.29 0.8
 -4 2 -8 0.04 0.69
 4 -2 8 -1.2 0.67
 4 -2 8 0.1 0.67
 4 -2 8 0.62 0.91
 4 -2 8 0.1 0.89
 4 -2 8 -0.84 0.78
 -3 2 9 0.82 0.99
 -3 2 9 0.56 1.06
 3 -2 -9 -1.13 0.87
 3 -2 -9 1.6 0.92
 3 -2 -9 -1.63 0.87
 3 -2 -9 -1.75 1.18
 -3 2 8 0.85 0.63
 -3 2 8 0.23 0.61
 -3 2 8 0.54 0.69
 -3 2 8 -1.19 0.7
 3 -2 -8 0.39 0.7
 3 -2 -8 1.01 0.68
 3 -2 -8 1.83 0.59
 3 -2 -8 -0.74 0.92
 3 -2 -8 0.49 0.66
 3 -2 -8 0.66 0.33
 -3 2 7 12.3 1.03
 -3 2 7 10.59 0.98
 -3 2 7 11.59 1.01
 -3 2 7 10.14 0.96
 3 -2 -7 10.75 0.94
 3 -2 -7 10 1.44
 3 -2 -7 9.34 0.86
 3 -2 -7 9.98 0.87
 3 -2 -7 10.69 0.9
 -3 2 6 0.44 0.47
 -3 2 6 0.39 0.45
 -3 2 6 -0.04 0.43
 -3 2 6 0.62 0.43
 3 -2 -6 0.07 0.59
 3 -2 -6 1.24 0.49
 3 -2 -6 0.66 0.44
 3 -2 -6 0.58 0.4
 3 -2 -6 0.71 0.46
 -3 2 5 39.28 1.2
 -3 2 5 39.61 1.15
 -3 2 5 39.31 1.18
 3 -2 -5 37.3 1.22
 3 -2 -5 39.19 0.99
 3 -2 -5 38.18 1.16
 -3 2 4 0.3 0.35
 -3 2 4 0.57 0.34
 3 -2 -4 0.46 0.31
 3 -2 -4 0.33 0.34
 3 -2 -4 -0.19 0.25
 -3 2 3 0.59 0.34
 -3 2 3 1.26 0.33
 -3 2 3 0.46 0.23
 3 -2 -3 0.89 0.33
 3 -2 -3 0.99 0.35
 -3 2 2 9.29 0.53
 -3 2 2 9.07 0.52
 -3 2 2 9.1 0.4
 3 -2 -2 8.49 0.47
 3 -2 -2 8.91 0.56
 3 -2 -2 9.14 0.45
 -3 2 1 147.54 2.29
 -3 2 1 150.15 2.43
 -3 2 1 145.53 2.42
 3 -2 -1 146.76 2.29
 3 -2 -1 148.12 2.89
 3 -2 -1 150.97 2.43
 -3 2 0 0.03 0.28
 -3 2 0 0.22 0.17
 -3 2 0 0.28 0.28
 -3 2 0 0.28 0.25
 -3 2 0 0.3 0.23
 3 -2 0 0.15 0.26
 3 -2 0 0.41 0.23
 3 -2 0 0.09 0.23
 3 -2 0 0.01 0.26
 3 -2 0 0.11 0.17
 -3 2 -1 32.04 0.99
 -3 2 -1 33.77 0.75
 -3 2 -1 31.76 0.74
 -3 2 -1 33.22 0.82
 -3 2 -1 34.21 0.85
 3 -2 1 33.86 0.65
 3 -2 1 32.42 0.73
 3 -2 1 34.14 1.04
 3 -2 1 33.64 0.84
 3 -2 1 32.93 0.84
 3 -2 1 33.13 0.75
 -3 2 -2 51.92 1.08
 -3 2 -2 51.35 1.47
 -3 2 -2 50.76 0.88
 -3 2 -2 51.55 1.03
 -3 2 -2 50.91 1.14
 -3 2 -2 51.72 1.01
 -3 2 -2 51.75 1.13
 3 -2 2 52.69 1.08
 3 -2 2 52.05 1.04
 3 -2 2 50.51 1.14
 3 -2 2 50.5 1.08
 3 -2 2 52.03 1.16
 3 -2 2 50.45 1.47
 -3 2 -3 100.05 1.92
 -3 2 -3 98.24 2.43
 -3 2 -3 93.04 1.87
 -3 2 -3 96.91 1.76
 -3 2 -3 97.29 1.84
 3 -2 3 93.57 1.74
 3 -2 3 96.9 1.88
 3 -2 3 95.18 1.88
 3 -2 3 96.6 1.63
 3 -2 3 95.18 1.8
 3 -2 3 96.54 1.84
 3 -2 3 94.1 1.75
 -3 2 -4 1.18 0.48
 -3 2 -4 1.26 0.35
 -3 2 -4 0.94 0.36
 -3 2 -4 1.26 0.34
 -3 2 -4 1.58 0.4
 -3 2 -4 1.26 0.36
 3 -2 4 1.42 0.29
 3 -2 4 1.09 0.32
 3 -2 4 2.26 0.39
 3 -2 4 1.38 0.37
 3 -2 4 1.24 0.39
 3 -2 4 1.33 0.37
 -3 2 -5 3.49 0.53
 -3 2 -5 2.64 0.5
 -3 2 -5 2.4 0.6
 -3 2 -5 2.82 0.48
 -3 2 -5 2.97 0.48
 3 -2 5 2.58 0.44
 3 -2 5 2.24 0.45
 3 -2 5 2.44 0.37
 3 -2 5 2.92 0.5
 3 -2 5 2.8 0.46
 3 -2 5 2.56 0.43
 -3 2 -6 1.3 0.52
 -3 2 -6 0.61 0.47
 -3 2 -6 0.3 0.46
 -3 2 -6 0.67 0.52
 -3 2 -6 0.25 0.57
 3 -2 6 1.29 0.5
 3 -2 6 0.94 0.42
 3 -2 6 0.4 0.42
 3 -2 6 0.93 0.46
 3 -2 6 0.72 0.5
 3 -2 6 0.21 0.43
 -3 2 -7 6.77 0.85
 -3 2 -7 5.99 0.75
 -3 2 -7 7.56 0.8
 -3 2 -7 6.57 0.79
 -3 2 -7 5.78 0.9
 3 -2 7 7.11 0.77
 3 -2 7 6.44 0.73
 3 -2 7 6.49 0.79
 3 -2 7 6.59 0.69
 3 -2 7 6.49 0.8
 -3 2 -8 -0.78 0.67
 -3 2 -8 -0.13 0.67
 -3 2 -8 -0.66 0.81
 -3 2 -8 -0.78 0.84
 -3 2 -8 -1.27 0.85
 3 -2 8 0.04 0.69
 3 -2 8 0.08 0.87
 3 -2 8 -1.48 0.77
 3 -2 8 0.77 0.69
 3 -2 8 0.38 0.67
 -2 2 9 0.51 0.94
 -2 2 9 0.57 1.16
 -2 2 9 1 0.82
 2 -2 -9 -2.06 1.23
 2 -2 -9 0.08 0.88
 2 -2 -9 0.07 0.95
 2 -2 -9 0.8 0.86
 -2 2 8 3.61 0.81
 -2 2 8 2.14 0.64
 -2 2 8 3.19 0.75
 2 -2 -8 1.88 1
 2 -2 -8 2.58 0.78
 2 -2 -8 1.26 0.73
 2 -2 -8 3.4 0.71
 2 -2 -8 2.28 0.68
 -2 2 7 25.55 1.18
 -2 2 7 24.9 1.2
 -2 2 7 23.78 1.19
 -2 2 7 24.85 1.25
 2 -2 -7 27.08 1.18
 2 -2 -7 26.47 1.22
 2 -2 -7 25.8 1.09
 2 -2 -7 25.81 1.64
 2 -2 -7 26.77 1.24
 -2 2 6 0.63 0.41
 -2 2 6 0.69 0.45
 -2 2 6 0.04 0.41
 -2 2 6 0.42 0.44
 2 -2 -6 0.19 0.4
 2 -2 -6 0.49 0.58
 2 -2 -6 0.37 0.43
 2 -2 -6 0.47 0.4
 2 -2 -6 0.39 0.38
 -2 2 5 4.11 0.58
 -2 2 5 3.1 0.47
 -2 2 5 3.89 0.48
 -2 2 5 3.63 0.46
 2 -2 -5 2.71 0.45
 2 -2 -5 4.39 0.51
 2 -2 -5 3.43 0.49
 2 -2 -5 2.85 0.37
 -2 2 4 49.58 1.23
 -2 2 4 52.51 1.25
 -2 2 4 52.8 1.33
 2 -2 -4 51.25 1.06
 2 -2 -4 52.12 1.27
 2 -2 -4 49.96 1.28
 -2 2 3 169.18 2.91
 -2 2 3 173.33 2.97
 2 -2 -3 175.26 2.65
 2 -2 -3 175.67 2.93
 2 -2 -3 168.91 2.96
 -2 2 2 61.75 1.22
 -2 2 2 60.78 1.23
 -2 2 2 60.5 1.03
 2 -2 -2 60.7 1.25
 2 -2 -2 61.09 1.21
 -2 2 1 44.54 0.9
 2 -2 -1 44.88 0.78
 -2 2 0 7.42 0.37
 -2 2 0 6.97 0.36
 -2 2 0 7.4 0.23
 -2 2 0 7.27 0.41
 -2 2 0 7.69 0.34
 2 -2 0 7.61 0.41
 2 -2 0 7.25 0.32
 2 -2 0 7.4 0.4
 2 -2 0 6.99 0.39
 2 -2 0 7.56 0.23
 -2 2 -1 135.78 2.13
 -2 2 -1 138.01 2.81
 -2 2 -1 136.8 2.23
 -2 2 -1 137.68 2.26
 -2 2 -1 135.98 2.14
 -2 2 -1 136.02 2.23
 2 -2 1 134.54 2.12
 2 -2 1 132.21 2.23
 2 -2 1 138.79 2.11
 2 -2 1 138.84 2.81
 2 -2 1 137.04 2.23
 2 -2 1 132.38 2.14
 -2 2 -2 0.22 0.3
 -2 2 -2 0.1 0.21
 -2 2 -2 -0.14 0.24
 -2 2 -2 0.32 0.35
 -2 2 -2 0.07 0.19
 -2 2 -2 0.31 0.28
 2 -2 2 0.07 0.19
 2 -2 2 -0.05 0.24
 2 -2 2 0.23 0.26
 2 -2 2 -0.1 0.28
 2 -2 2 -0.09 0.2
 2 -2 2 -0.07 0.26
 2 -2 2 0.28 0.35
 -2 2 -3 20.34 0.72
 -2 2 -3 18.62 0.69
 -2 2 -3 18.9 0.7
 -2 2 -3 18.12 0.63
 -2 2 -3 18.74 0.94
 -2 2 -3 19.65 0.72
 2 -2 3 18.35 0.69
 2 -2 3 17.95 0.69
 2 -2 3 19.58 0.71
 2 -2 3 19.12 0.7
 2 -2 3 19.07 0.61
 2 -2 3 18.55 0.62
 2 -2 3 18.89 0.37
 -2 2 -4 0.41 0.3
 -2 2 -4 0.1 0.33
 -2 2 -4 0.41 0.44
 -2 2 -4 0.15 0.31
 -2 2 -4 0.21 0.32
 2 -2 4 0.33 0.28
 2 -2 4 0.57 0.3
 2 -2 4 0.37 0.34
 2 -2 4 0.67 0.34
 2 -2 4 0.28 0.33
 2 -2 4 0.41 0.34
 -2 2 -5 0.73 0.42
 -2 2 -5 0.79 0.39
 -2 2 -5 0.49 0.48
 -2 2 -5 0.49 0.36
 -2 2 -5 0.47 0.43
 2 -2 5 1.18 0.43
 2 -2 5 1.07 0.41
 2 -2 5 0.78 0.36
 2 -2 5 0.76 0.39
 2 -2 5 1.08 0.4
 2 -2 5 0.49 0.38
 -2 2 -6 0.64 0.46
 -2 2 -6 1.14 0.46
 -2 2 -6 -0.15 0.53
 -2 2 -6 0.41 0.45
 -2 2 -6 -0.3 0.43
 2 -2 6 0.75 0.5
 2 -2 6 1.01 0.47
 2 -2 6 0.38 0.49
 2 -2 6 0.63 0.42
 2 -2 6 0.56 0.47
 -2 2 -7 25.58 1.3
 -2 2 -7 23.08 1.12
 -2 2 -7 22.34 1.19
 -2 2 -7 24.39 1.24
 -2 2 -7 22.38 1.56
 2 -2 7 22.47 1.26
 2 -2 7 23.9 1.14
 2 -2 7 23.26 1.12
 2 -2 7 24.53 1.27
 2 -2 7 23.39 1.19
 -2 2 -8 1.03 0.76
 -2 2 -8 1.19 0.66
 -2 2 -8 0.65 0.86
 -2 2 -8 0.79 0.7
 2 -2 8 -0.19 0.7
 2 -2 8 0.89 0.81
 2 -2 8 0.97 0.75
 2 -2 8 0.7 0.77
 2 -2 8 1.43 0.72
 -2 2 -9 0.57 1.04
 2 -2 9 -0.18 1.06
 2 -2 9 0.86 0.99
 2 -2 9 2.04 1.14
 -1 2 9 0.83 0.86
 -1 2 9 1.55 1.14
 1 -2 -9 2.43 0.95
 1 -2 -9 0.37 0.94
 1 -2 -9 0.61 1.34
 -1 2 8 -1.22 0.58
 -1 2 8 0.05 0.7
 -1 2 8 -0.26 0.74
 1 -2 -8 -0.47 0.61
 1 -2 -8 1.37 0.69
 1 -2 -8 -0.16 0.62
 1 -2 -8 -1.77 0.9
 1 -2 -8 -0.16 0.63
 -1 2 7 2.61 0.64
 -1 2 7 2.41 0.58
 -1 2 7 2.55 0.56
 1 -2 -7 2.59 0.82
 1 -2 -7 2.12 0.56
 1 -2 -7 2.51 0.56
 1 -2 -7 2.83 0.6
 1 -2 -7 2.15 0.56
 -1 2 6 1.31 0.49
 -1 2 6 0.78 0.47
 -1 2 6 2.29 0.51
 1 -2 -6 1.18 0.58
 1 -2 -6 1.08 0.4
 1 -2 -6 1.57 0.47
 1 -2 -6 2.14 0.5
 1 -2 -6 2.1 0.46
 -1 2 5 2.13 0.42
 -1 2 5 1.91 0.42
 -1 2 5 2.01 0.42
 -1 2 5 1.81 0.37
 1 -2 -5 1.42 0.41
 1 -2 -5 2.08 0.45
 1 -2 -5 1.67 0.34
 1 -2 -5 2.59 0.46
 -1 2 4 0.4 0.35
 -1 2 4 0.26 0.32
 -1 2 4 0.19 0.26
 -1 2 4 0.27 0.36
 1 -2 -4 -0.38 0.33
 1 -2 -4 0.08 0.25
 1 -2 -4 0.53 0.33
 1 -2 -4 0.39 0.32
 -1 2 3 7.93 0.45
 -1 2 3 7.78 0.56
 -1 2 3 7.87 0.51
 -1 2 3 8.24 0.58
 1 -2 -3 7.98 0.57
 1 -2 -3 8.24 0.52
 1 -2 -3 8.56 0.41
 -1 2 2 146.26 2.47
 -1 2 2 145.28 2.44
 1 -2 -2 143.7 2.46
 1 -2 -2 152.68 2.46
 1 -2 -2 151.97 2.21
 -1 2 1 36.27 0.73
 -1 2 1 37.35 0.61
 -1 2 1 38.16 0.6
 1 -2 -1 37.35 0.76
 1 -2 -1 38.23 0.75
 -1 2 -1 69.43 1.55
 -1 2 -1 69.36 1.12
 -1 2 -1 71.31 1.24
 -1 2 -1 71.31 1.22
 -1 2 -1 69.94 1.22
 1 -2 1 70.45 1.22
 1 -2 1 70.51 1.24
 1 -2 1 71.75 1.23
 1 -2 1 67.69 1.14
 1 -2 1 70.32 1.55
 1 -2 1 69.53 1.12
 1 -2 1 70.19 1.21
 -1 2 -2 325.75 6.47
 -1 2 -2 336.34 5.13
 -1 2 -2 324.89 5.12
 -1 2 -2 337.64 5.18
 -1 2 -2 332.66 5.77
 -1 2 -2 328.52 5.04
 1 -2 2 338.1 5.13
 1 -2 2 329.2 5.04
 1 -2 2 337.01 5.13
 1 -2 2 327.34 5.17
 1 -2 2 332.21 6.47
 1 -2 2 331.91 5.36
 -1 2 -3 0.19 0.27
 -1 2 -3 0.06 0.29
 -1 2 -3 0.1 0.27
 -1 2 -3 0.26 0.31
 -1 2 -3 0.16 0.38
 1 -2 3 0.05 0.29
 1 -2 3 0.16 0.31
 1 -2 3 0.1 0.3
 1 -2 3 0.46 0.25
 1 -2 3 0.06 0.25
 -1 2 -4 0.61 0.45
 -1 2 -4 0.48 0.36
 -1 2 -4 0.3 0.3
 -1 2 -4 0.39 0.33
 -1 2 -4 0.46 0.31
 1 -2 4 0.7 0.35
 1 -2 4 0.61 0.32
 1 -2 4 0.37 0.29
 1 -2 4 0.98 0.35
 1 -2 4 0.62 0.33
 -1 2 -5 26.71 1.24
 -1 2 -5 26.26 1
 -1 2 -5 27.58 1.02
 -1 2 -5 25.9 0.95
 -1 2 -5 26.84 0.96
 1 -2 5 25.02 0.91
 1 -2 5 26.69 0.95
 1 -2 5 27.71 1.01
 1 -2 5 25.29 0.92
 -1 2 -6 0.38 0.55
 -1 2 -6 1.91 0.49
 -1 2 -6 2 0.52
 -1 2 -6 1.82 0.51
 -1 2 -6 0.77 0.45
 1 -2 6 1.12 0.49
 1 -2 6 0.69 0.47
 1 -2 6 1.93 0.48
 1 -2 6 1.79 0.47
 1 -2 6 1.55 0.49
 -1 2 -7 0.02 0.5
 -1 2 -7 -0.29 0.51
 -1 2 -7 -0.58 0.5
 -1 2 -7 -0.56 0.49
 -1 2 -7 -1.36 0.58
 1 -2 7 -0.12 0.47
 1 -2 7 0.54 0.62
 1 -2 7 -0.21 0.49
 1 -2 7 0.02 0.54
 1 -2 7 1.02 0.53
 -1 2 -8 1.32 0.76
 -1 2 -8 -1.29 0.84
 -1 2 -8 0.54 0.68
 -1 2 -8 1.28 0.7
 -1 2 -8 2.22 0.75
 1 -2 8 0.82 0.68
 1 -2 8 1.1 0.81
 1 -2 8 1.43 0.79
 1 -2 8 0.09 0.63
 1 -2 8 1.12 0.67
 -1 2 -9 1.05 1.45
 -1 2 -9 2.47 1.09
 1 -2 9 1.71 1.02
 1 -2 9 3.44 1.15
 1 -2 9 3.06 1.14
 0 2 9 3.66 1.06
 0 2 9 5.55 1.19
 0 2 9 3.72 1.12
 0 -2 -9 0.99 1.24
 0 -2 -9 3.69 1.12
 0 -2 -9 3.41 0.99
 0 2 8 0.83 0.58
 0 2 8 0.38 0.8
 0 2 8 0.72 0.58
 0 2 8 1.42 0.77
 0 -2 -8 0.91 0.68
 0 -2 -8 -0.99 0.87
 0 -2 -8 0.83 0.71
 0 -2 -8 1.45 0.65
 0 -2 -8 1.2 0.61
 0 2 7 0.24 0.5
 0 2 7 0.19 0.59
 0 2 7 0.23 0.23
 0 2 7 0.11 0.5
 0 2 7 0.77 0.49
 0 -2 -7 0.47 0.48
 0 -2 -7 -0.27 0.7
 0 -2 -7 1.55 0.58
 0 -2 -7 -0.6 0.53
 0 -2 -7 0.51 0.51
 0 2 6 0.67 0.43
 0 2 6 -0.16 0.46
 0 2 6 0.26 0.43
 0 2 6 0.41 0.24
 0 -2 -6 0.23 0.44
 0 -2 -6 0.1 0.45
 0 -2 -6 0 0.39
 0 -2 -6 0.03 0.53
 0 -2 -6 -0.27 0.41
 0 2 5 17.66 0.86
 0 2 5 17.02 0.8
 0 2 5 16.09 0.75
 0 2 5 16.29 0.52
 0 -2 -5 16.72 0.85
 0 -2 -5 17.01 1.18
 0 -2 -5 16.28 0.69
 0 -2 -5 16.9 0.84
 0 -2 -5 16.49 0.8
 0 2 4 9.46 0.62
 0 2 4 8.98 0.61
 0 2 4 8.59 0.5
 0 2 4 9.53 0.66
 0 2 4 8.37 0.39
 0 -2 -4 9.58 0.6
 0 -2 -4 8.48 0.65
 0 -2 -4 8.58 0.6
 0 2 3 12.57 0.6
 0 2 3 12.7 0.62
 0 2 3 13.06 0.48
 0 2 3 13.27 0.41
 0 2 3 12.69 0.59
 0 -2 -3 13.07 0.62
 0 -2 -3 12.97 0.6
 0 -2 -3 13.09 0.58
 0 2 2 377.69 6.04
 0 2 2 381.03 6.58
 0 2 2 378.88 5.88
 0 2 2 383.19 5.86
 0 2 2 387.56 5.86
 0 -2 -2 379.61 5.85
 0 -2 -2 393.77 5.87
 0 -2 -2 376.3 5.88
 0 2 1 166.03 2.56
 0 2 1 168.12 2.63
 0 2 1 162.25 2.55
 0 2 1 162.59 2.55
 0 -2 -1 163.99 2.63
 0 -2 -1 163.05 2.56
 0 -2 -1 161.36 2.54
 0 -2 -1 163.16 2.55
 0 2 -1 163.97 2.56
 0 2 -1 164.91 2.89
 0 2 -1 162.89 2.58
 0 2 -1 166.48 3.21
 0 2 -1 163.97 2.52
 0 2 -1 163.81 2.52
 0 -2 1 163.64 3.2
 0 -2 1 160.51 2.58
 0 -2 1 166.33 2.52
 0 -2 1 163.1 2.51
 0 -2 1 167.16 2.7
 0 -2 1 162.04 2.89
 0 2 -2 379.5 5.86
 0 2 -2 387.92 6.65
 0 2 -2 389 5.87
 0 2 -2 392.11 5.96
 0 2 -2 388.41 7.41
 0 -2 2 388.63 5.87
 0 -2 2 377.73 5.82
 0 -2 2 382.91 5.86
 0 -2 2 392.48 7.41
 0 -2 2 378.95 6.65
 0 -2 2 382.6 5.95
 0 2 -3 13.15 0.6
 0 2 -3 12.97 0.81
 0 2 -3 12.65 0.56
 0 2 -3 12.64 0.59
 0 2 -3 13.27 0.61
 0 -2 3 13.32 0.6
 0 -2 3 13.35 0.65
 0 -2 3 13.52 0.54
 0 -2 3 13.37 0.61
 0 -2 3 13.74 0.61
 0 2 -4 9.77 0.62
 0 2 -4 9.85 0.64
 0 2 -4 9.51 0.65
 0 2 -4 8.73 0.57
 0 2 -4 8.96 0.85
 0 -2 4 9.79 0.59
 0 -2 4 9.54 0.62
 0 -2 4 9.73 0.55
 0 2 -5 16.44 1.09
 0 2 -5 17.5 0.82
 0 2 -5 16.81 0.74
 0 2 -5 17.29 0.85
 0 2 -5 16.64 0.82
 0 2 -5 15.41 0.82
 0 -2 5 17.12 0.76
 0 -2 5 16.26 0.8
 0 -2 5 16.27 0.86
 0 2 -6 -0.03 0.53
 0 2 -6 0.04 0.41
 0 2 -6 0.33 0.42
 0 2 -6 -0.09 0.43
 0 2 -6 -0.21 0.42
 0 -2 6 0.53 0.44
 0 -2 6 0.77 0.4
 0 -2 6 -0.1 0.43
 0 2 -7 1.62 0.59
 0 2 -7 0.37 0.57
 0 2 -7 -0.76 0.68
 0 2 -7 -0.07 0.51
 0 2 -7 1.61 0.52
 0 -2 7 -0.59 0.47
 0 -2 7 0.44 0.61
 0 -2 7 -0.28 0.56
 0 -2 7 0.64 0.49
 0 2 -8 1.15 0.77
 0 2 -8 1.38 0.73
 0 2 -8 -0.14 0.73
 0 2 -8 -0.31 0.87
 0 2 -8 0.57 0.65
 0 -2 8 0.75 0.3
 0 -2 8 1.14 0.69
 0 -2 8 1.56 0.63
 0 -2 8 -0.2 0.69
 0 -2 8 0.71 0.77
 0 -2 8 1.9 0.86
 0 2 -9 1.91 1.06
 0 2 -9 2.06 1.4
 0 2 -9 5.23 1.09
 0 2 -9 4.27 1.04
 0 -2 9 4.23 0.99
 0 -2 9 4.2 1.22
 0 -2 9 4.17 1.11
 0 -2 9 4.25 1.12
 1 2 9 0.41 0.97
 1 2 9 0.97 1.14
 1 2 9 3.06 1.19
 -1 -2 -9 3 1.03
 -1 -2 -9 1.19 1.06
 1 2 8 0.72 0.38
 1 2 8 1.55 0.58
 1 2 8 1.7 0.59
 1 2 8 1.84 0.83
 1 2 8 1.28 0.77
 1 2 8 -0.35 0.68
 -1 -2 -8 0.49 0.6
 -1 -2 -8 0.58 0.8
 -1 -2 -8 -0.45 0.8
 -1 -2 -8 1.37 0.71
 -1 -2 -8 1.13 0.65
 1 2 7 0.2 0.54
 1 2 7 0.81 0.47
 1 2 7 0.99 0.48
 1 2 7 0.53 0.35
 1 2 7 -0.58 0.58
 -1 -2 -7 0.09 0.48
 -1 -2 -7 -0.07 0.47
 -1 -2 -7 0.2 0.66
 -1 -2 -7 0.93 0.55
 -1 -2 -7 0.63 0.58
 1 2 6 1.93 0.49
 1 2 6 1.7 0.51
 1 2 6 1.63 0.56
 1 2 6 0.64 0.43
 1 2 6 1.35 0.33
 -1 -2 -6 1.17 0.5
 -1 -2 -6 1.67 0.66
 -1 -2 -6 1.15 0.48
 -1 -2 -6 1.5 0.49
 1 2 5 26.5 0.97
 1 2 5 25.92 0.93
 1 2 5 27.22 0.99
 1 2 5 25.56 0.98
 -1 -2 -5 26.84 0.97
 -1 -2 -5 25.86 0.96
 -1 -2 -5 28.38 0.97
 -1 -2 -5 25.18 0.53
 -1 -2 -5 28.65 1.37
 1 2 4 0.06 0.33
 1 2 4 1.12 0.37
 1 2 4 0.83 0.35
 1 2 4 0.98 0.35
 -1 -2 -4 0.33 0.34
 -1 -2 -4 0.37 0.34
 -1 -2 -4 0.53 0.35
 -1 -2 -4 0.72 0.24
 -1 -2 -4 0.59 0.17
 1 2 3 0.12 0.33
 1 2 3 0.35 0.29
 1 2 3 0.33 0.3
 1 2 3 0.19 0.29
 -1 -2 -3 0.29 0.33
 -1 -2 -3 0.46 0.16
 -1 -2 -3 0.43 0.3
 -1 -2 -3 0.61 0.29
 -1 -2 -3 0.08 0.18
 -1 -2 -3 0.37 0.33
 1 2 2 336.32 5.03
 1 2 2 326.59 5.13
 1 2 2 325.85 5.13
 1 2 2 332.76 5.14
 1 2 2 336.05 5.15
 -1 -2 -2 330.19 5.19
 -1 -2 -2 340.03 5.14
 -1 -2 -2 329.88 5.14
 -1 -2 -2 336.18 5.15
 -1 -2 -2 330.07 5.13
 -1 -2 -2 328.58 5.65
 1 2 1 68.85 1.22
 1 2 1 69.68 1.21
 1 2 1 72.35 1.21
 1 2 1 71.9 1.17
 1 2 1 70.07 1.21
 -1 -2 -1 70.59 1.16
 -1 -2 -1 72.22 1.23
 -1 -2 -1 70.22 1.19
 -1 -2 -1 69.04 1.21
 -1 -2 -1 69.05 1.21
 -1 -2 -1 68.96 1.2
 1 2 0 48 0.76
 1 2 0 39.93 0.8
 1 2 0 41.33 0.82
 1 2 0 42.88 0.81
 -1 -2 0 53.39 0.71
 1 2 -1 38.05 0.86
 1 2 -1 37.02 0.74
 1 2 -1 36.59 0.83
 1 2 -1 37.91 0.71
 1 2 -1 36.78 0.73
 1 2 -1 37.79 0.72
 1 2 -1 36.94 0.74
 1 2 -1 37.23 0.74
 1 2 -1 37.25 0.66
 -1 -2 1 38.47 0.71
 -1 -2 1 37.28 0.85
 -1 -2 1 37.4 0.74
 -1 -2 1 37.29 0.85
 -1 -2 1 37.45 0.71
 -1 -2 1 37.92 0.72
 -1 -2 1 36.74 0.73
 -1 -2 1 37.33 0.66
 1 2 -2 147.42 2.39
 1 2 -2 147.44 2.73
 1 2 -2 147.25 2.38
 1 2 -2 146.91 2.39
 1 2 -2 147.44 2.48
 1 2 -2 153.34 2.32
 1 2 -2 147.51 3.01
 -1 -2 2 145.77 2.74
 -1 -2 2 148.9 2.48
 -1 -2 2 148.27 3.01
 -1 -2 2 146.71 2.39
 1 2 -3 8.41 0.55
 1 2 -3 8.34 0.48
 1 2 -3 8.44 0.48
 1 2 -3 8.32 0.68
 1 2 -3 7.91 0.31
 1 2 -3 7.93 0.55
 1 2 -3 8.1 0.48
 -1 -2 3 7.72 0.55
 -1 -2 3 7.84 0.52
 -1 -2 3 6.99 0.57
 1 2 -4 0.09 0.14
 1 2 -4 0.15 0.4
 1 2 -4 0.04 0.32
 1 2 -4 0.11 0.32
 1 2 -4 0.08 0.27
 1 2 -4 -0.05 0.31
 -1 -2 4 -0.23 0.29
 -1 -2 4 0.26 0.3
 -1 -2 4 -0.24 0.33
 -1 -2 4 0.39 0.32
 1 2 -5 2.15 0.44
 1 2 -5 1.07 0.46
 1 2 -5 1.36 0.39
 1 2 -5 2.16 0.39
 1 2 -5 1.5 0.4
 -1 -2 5 1.11 0.38
 -1 -2 5 1.95 0.39
 -1 -2 5 1.82 0.42
 -1 -2 5 1.65 0.41
 1 2 -6 1.53 0.61
 1 2 -6 1.81 0.49
 1 2 -6 1.33 0.45
 1 2 -6 1.94 0.45
 1 2 -6 1.58 0.49
 -1 -2 6 2.02 0.49
 -1 -2 6 1.82 0.5
 -1 -2 6 1.28 0.45
 1 2 -7 2.36 0.65
 1 2 -7 1.78 0.81
 1 2 -7 2.8 0.66
 1 2 -7 3.45 0.59
 1 2 -7 2.82 0.62
 -1 -2 7 2.09 0.6
 -1 -2 7 3.18 0.62
 -1 -2 7 3.5 0.66
 1 2 -8 -1.07 0.85
 1 2 -8 0.24 0.7
 1 2 -8 0.9 0.68
 1 2 -8 2 0.63
 1 2 -8 -0.48 0.74
 -1 -2 8 -0.18 0.78
 -1 -2 8 1.11 0.62
 -1 -2 8 0.85 0.68
 -1 -2 8 0.55 0.8
 1 2 -9 0.62 1.33
 1 2 -9 0.87 0.94
 1 2 -9 1.46 1.06
 1 2 -9 2.21 1
 -1 -2 9 1.53 1.02
 -1 -2 9 1.29 1.12
 -1 -2 9 1.52 1.14
 -1 -2 9 1.67 0.87
 2 2 9 0.82 1.17
 2 2 9 1.46 1.18
 2 2 9 -0.7 0.98
 -2 -2 -9 0.59 1.14
 -2 -2 -9 1.38 1.04
 2 2 8 0.67 0.51
 2 2 8 1.06 0.7
 2 2 8 0.09 0.79
 2 2 8 0.67 0.82
 2 2 8 1.35 0.61
 2 2 8 2.65 0.62
 -2 -2 -8 0.68 0.72
 -2 -2 -8 0.31 0.78
 -2 -2 -8 0.09 0.8
 -2 -2 -8 -0.58 0.62
 -2 -2 -8 2.66 0.66
 2 2 7 24.52 1.13
 2 2 7 23.19 1.1
 2 2 7 22.87 0.96
 2 2 7 24.9 1.29
 2 2 7 23.36 1.15
 2 2 7 23.33 1.32
 -2 -2 -7 23.99 1.28
 -2 -2 -7 23.46 1.23
 -2 -2 -7 24.08 1.65
 -2 -2 -7 22.17 1.15
 2 2 6 0.24 0.45
 2 2 6 1.37 0.52
 2 2 6 0.4 0.45
 2 2 6 0.55 0.42
 -2 -2 -6 0.76 0.44
 -2 -2 -6 1.98 0.61
 -2 -2 -6 1.07 0.5
 -2 -2 -6 0.27 0.43
 2 2 5 0.64 0.38
 2 2 5 1.09 0.4
 2 2 5 1.7 0.41
 2 2 5 1.14 0.42
 -2 -2 -5 0.79 0.4
 -2 -2 -5 1 0.41
 -2 -2 -5 0.9 0.3
 -2 -2 -5 0.71 0.54
 -2 -2 -5 0.71 0.38
 2 2 4 0.49 0.31
 2 2 4 0.4 0.31
 2 2 4 0.51 0.33
 2 2 4 0.11 0.33
 2 2 4 0.91 0.37
 -2 -2 -4 0.63 0.19
 -2 -2 -4 0.47 0.24
 -2 -2 -4 0.91 0.46
 -2 -2 -4 0.13 0.37
 -2 -2 -4 0.33 0.35
 -2 -2 -4 0.76 0.37
 -2 -2 -4 0.39 0.31
 2 2 3 19.3 0.71
 2 2 3 18.79 0.71
 2 2 3 20.97 0.68
 2 2 3 19.17 0.74
 2 2 3 18.79 0.7
 -2 -2 -3 19.09 0.72
 -2 -2 -3 19.37 0.65
 -2 -2 -3 18.4 0.5
 -2 -2 -3 18.94 0.57
 -2 -2 -3 18.64 0.75
 -2 -2 -3 18.05 0.66
 2 2 2 0.03 0.21
 2 2 2 0.16 0.27
 2 2 2 0.37 0.27
 2 2 2 0.05 0.27
 2 2 2 0.28 0.3
 -2 -2 -2 -0.21 0.19
 -2 -2 -2 0.22 0.2
 -2 -2 -2 0.17 0.28
 -2 -2 -2 0.15 0.29
 -2 -2 -2 -0.06 0.27
 -2 -2 -2 0.27 0.28
 2 2 1 136.37 2.26
 2 2 1 136.65 2.11
 2 2 1 140.27 2.24
 2 2 1 130.86 2.16
 2 2 1 136.16 2.2
 -2 -2 -1 134.38 2.26
 -2 -2 -1 137.09 2.18
 -2 -2 -1 134.31 2.19
 -2 -2 -1 136.1 2.2
 -2 -2 -1 137.89 2.1
 -2 -2 -1 136.84 2.23
 2 2 0 7.72 0.3
 2 2 0 7.65 0.39
 2 2 0 7.85 0.42
 2 2 0 7.23 0.37
 2 2 0 7.74 0.41
 2 2 0 8.09 0.35
 -2 -2 0 7.6 0.29
 -2 -2 0 7.49 0.4
 -2 -2 0 7.69 0.41
 -2 -2 0 7.29 0.18
 -2 -2 0 7.26 0.28
 -2 -2 0 7.18 0.36
 -2 -2 0 8.4 0.42
 2 2 -1 45.6 0.91
 2 2 -1 45.05 0.91
 2 2 -1 44.3 0.92
 2 2 -1 43.68 0.86
 2 2 -1 43.87 0.87
 2 2 -1 44.16 0.87
 2 2 -1 44.93 0.78
 2 2 -1 45.94 0.92
 -2 -2 1 45.08 0.92
 -2 -2 1 44.73 0.85
 -2 -2 1 45.36 0.87
 -2 -2 1 43.1 0.86
 -2 -2 1 44.06 0.78
 -2 -2 1 45.15 0.85
 -2 -2 1 43.25 0.9
 -2 -2 1 43.68 0.78
 2 2 -2 61.95 1.38
 2 2 -2 60.67 1.18
 2 2 -2 61.11 1.22
 2 2 -2 61.21 1.13
 2 2 -2 61.86 1.12
 -2 -2 2 61.26 1.13
 -2 -2 2 58.14 1.33
 -2 -2 2 58.99 1.12
 -2 -2 2 61.43 1.21
 -2 -2 2 62.62 1.09
 2 2 -3 177.64 3.59
 2 2 -3 171.08 2.89
 2 2 -3 172.67 2.88
 2 2 -3 169.39 2.98
 2 2 -3 172.45 2.76
 -2 -2 3 178.38 3.01
 -2 -2 3 172.09 2.77
 -2 -2 3 177.73 2.89
 -2 -2 3 175.61 2.83
 -2 -2 3 174.37 3.29
 2 2 -4 50.58 1.21
 2 2 -4 51.72 1.32
 2 2 -4 51.68 1.02
 2 2 -4 51.58 1.15
 2 2 -4 51.41 1.2
 2 2 -4 52.44 1.52
 -2 -2 4 51.69 0.93
 -2 -2 4 50.14 1.2
 -2 -2 4 51.07 1.33
 -2 -2 4 51.12 1.31
 2 2 -5 3.55 0.43
 2 2 -5 2.97 0.55
 2 2 -5 3.13 0.46
 2 2 -5 3.22 0.45
 2 2 -5 3.41 0.36
 2 2 -5 3.34 0.47
 -2 -2 5 3.61 0.45
 -2 -2 5 3.23 0.24
 -2 -2 5 2.98 0.48
 -2 -2 5 3.03 0.46
 2 2 -6 -0.3 0.54
 2 2 -6 0.28 0.43
 2 2 -6 0.28 0.44
 2 2 -6 0.33 0.19
 2 2 -6 1.24 0.46
 2 2 -6 0.24 0.44
 -2 -2 6 0.74 0.49
 -2 -2 6 0.75 0.42
 -2 -2 6 0.27 0.46
 -2 -2 6 0.16 0.45
 2 2 -7 25.83 1.2
 2 2 -7 24.6 1.23
 2 2 -7 26.75 1.14
 2 2 -7 24.32 1.67
 2 2 -7 24.82 1.23
 -2 -2 7 24.64 1.29
 -2 -2 7 24.67 1.21
 -2 -2 7 24.57 1.18
 -2 -2 7 25.91 1.17
 2 2 -8 3.05 0.78
 2 2 -8 2.4 0.64
 2 2 -8 2.08 0.85
 2 2 -8 2.82 0.84
 2 2 -8 0.56 0.98
 -2 -2 8 3.19 0.88
 -2 -2 8 0.48 0.72
 -2 -2 8 3.23 0.69
 2 2 -9 1.52 0.95
 2 2 -9 1.07 1.01
 2 2 -9 1.21 1.05
 2 2 -9 -2.25 1.18
 -2 -2 9 -1.33 1.02
 -2 -2 9 0.1 1.15
 -2 -2 9 1.74 1.01
 3 2 8 0.79 0.64
 3 2 8 0.75 0.67
 3 2 8 -0.33 0.82
 3 2 8 0.03 0.62
 3 2 8 0.25 0.88
 3 2 8 0.36 0.62
 -3 -2 -8 -0.3 0.86
 -3 -2 -8 -0.8 0.58
 -3 -2 -8 0.34 0.68
 -3 -2 -8 -0.89 0.75
 3 2 7 10.2 0.94
 3 2 7 7.44 0.86
 3 2 7 9.02 1.11
 3 2 7 6.35 0.63
 3 2 7 7.38 0.83
 3 2 7 5.89 0.66
 -3 -2 -7 7.56 0.8
 -3 -2 -7 6.8 0.76
 -3 -2 -7 5.29 0.87
 -3 -2 -7 5.84 0.79
 3 2 6 1.15 0.5
 3 2 6 1.23 0.45
 3 2 6 0.93 0.43
 3 2 6 0.08 0.36
 3 2 6 0.05 0.49
 -3 -2 -6 1.02 0.51
 -3 -2 -6 0.39 0.37
 -3 -2 -6 -0.4 0.54
 -3 -2 -6 0.82 0.51
 -3 -2 -6 -0.3 0.41
 3 2 5 2.43 0.45
 3 2 5 2.93 0.52
 3 2 5 2.41 0.46
 3 2 5 1.93 0.42
 3 2 5 2.09 0.33
 3 2 5 2.71 0.45
 -3 -2 -5 2.95 0.48
 -3 -2 -5 2.3 0.45
 -3 -2 -5 2.2 0.36
 -3 -2 -5 2.68 0.48
 -3 -2 -5 1.45 0.45
 -3 -2 -5 2.34 0.57
 3 2 4 1.15 0.37
 3 2 4 2.01 0.39
 3 2 4 1.44 0.38
 3 2 4 1.41 0.23
 3 2 4 1.49 0.34
 3 2 4 1.6 0.38
 -3 -2 -4 1.93 0.29
 -3 -2 -4 1.6 0.53
 -3 -2 -4 1.64 0.4
 -3 -2 -4 1.87 0.43
 -3 -2 -4 1.49 0.33
 -3 -2 -4 1.46 0.38
 3 2 3 98.44 1.92
 3 2 3 97.47 1.91
 3 2 3 95.96 1.79
 3 2 3 95.93 1.63
 3 2 3 96.35 1.86
 3 2 3 96.89 1.84
 -3 -2 -3 97.9 1.87
 -3 -2 -3 95.95 1.9
 -3 -2 -3 97.84 1.89
 -3 -2 -3 99.2 1.79
 3 2 2 50.06 1.12
 3 2 2 52.06 1.01
 3 2 2 52.18 1.15
 3 2 2 52.59 1.05
 3 2 2 53.23 1.15
 3 2 2 52.72 1.16
 -3 -2 -2 51.74 1.14
 -3 -2 -2 53.62 1.17
 -3 -2 -2 52.3 1
 -3 -2 -2 50.42 1.11
 -3 -2 -2 51.22 1.12
 3 2 1 32.7 0.77
 3 2 1 34.69 0.8
 3 2 1 32.76 0.79
 3 2 1 33.75 0.61
 3 2 1 32.72 0.8
 3 2 1 32.34 0.79
 -3 -2 -1 32.72 0.77
 -3 -2 -1 33.86 0.8
 -3 -2 -1 33.64 0.79
 -3 -2 -1 34.23 0.83
 -3 -2 -1 33.06 0.78
 3 2 0 0.24 0.21
 3 2 0 0.32 0.22
 3 2 0 -0.38 0.27
 3 2 0 0.24 0.1
 3 2 0 0.09 0.28
 3 2 0 0.12 0.2
 3 2 0 -0.04 0.26
 -3 -2 0 0.6 0.27
 -3 -2 0 0.34 0.3
 -3 -2 0 -0.06 0.2
 -3 -2 0 0.18 0.26
 -3 -2 0 0.28 0.28
 -3 -2 0 0.12 0.21
 3 2 -1 150.38 2.51
 3 2 -1 147.84 2.25
 3 2 -1 146.91 2.52
 3 2 -1 149.02 2.37
 3 2 -1 143.34 2.43
 3 2 -1 145.95 2.32
 3 2 -1 151.03 2.39
 -3 -2 1 146.51 2.32
 -3 -2 1 148.4 2.25
 -3 -2 1 147.86 2.45
 -3 -2 1 147.59 2.36
 -3 -2 1 143.29 2.31
 -3 -2 1 148.97 2.38
 3 2 -2 9.23 0.52
 3 2 -2 9.65 0.54
 3 2 -2 8.68 0.42
 3 2 -2 8.79 0.52
 3 2 -2 8.8 0.42
 3 2 -2 9.33 0.39
 -3 -2 2 9 0.54
 -3 -2 2 9.03 0.34
 -3 -2 2 8.25 0.5
 -3 -2 2 8.69 0.42
 -3 -2 2 9.56 0.5
 3 2 -3 0.69 0.31
 3 2 -3 0.92 0.3
 3 2 -3 1.03 0.32
 3 2 -3 1.03 0.28
 3 2 -3 0.74 0.26
 -3 -2 3 0.61 0.29
 -3 -2 3 0.74 0.33
 -3 -2 3 0.84 0.32
 -3 -2 3 0.44 0.26
 3 2 -4 0.32 0.33
 3 2 -4 0.42 0.32
 3 2 -4 0.33 0.31
 3 2 -4 0.16 0.35
 3 2 -4 -0.2 0.31
 -3 -2 4 0.03 0.35
 -3 -2 4 -0.06 0.34
 -3 -2 4 1.03 0.31
 -3 -2 4 -0.11 0.29
 3 2 -5 38.85 0.94
 3 2 -5 39.89 1.07
 3 2 -5 38.28 1.13
 3 2 -5 38.86 1.39
 3 2 -5 39.01 1.14
 3 2 -5 38.1 1.22
 -3 -2 5 37.94 1.09
 -3 -2 5 38.1 1.19
 -3 -2 5 39.51 1.25
 3 2 -6 -0.45 0.54
 3 2 -6 0.5 0.49
 3 2 -6 0.37 0.29
 3 2 -6 1 0.47
 3 2 -6 0.69 0.45
 3 2 -6 0.78 0.43
 -3 -2 6 0.36 0.48
 -3 -2 6 0.13 0.46
 -3 -2 6 0.66 0.5
 3 2 -7 9.16 0.93
 3 2 -7 11.08 1.01
 3 2 -7 9.54 0.48
 3 2 -7 7.82 0.94
 3 2 -7 10.48 0.98
 3 2 -7 9.67 0.93
 -3 -2 7 9.79 1.04
 -3 -2 7 11.43 1.04
 -3 -2 7 12.72 0.96
 -3 -2 7 10.49 0.99
 3 2 -8 -0.36 0.93
 3 2 -8 -0.22 0.73
 3 2 -8 0.87 0.73
 3 2 -8 0.96 0.61
 3 2 -8 0.87 0.79
 -3 -2 8 0.33 0.8
 -3 -2 8 0.57 0.76
 -3 -2 8 -0.14 0.69
 -3 -2 8 1.05 0.55
 3 2 -9 0.14 0.94
 3 2 -9 -1.93 1.19
 3 2 -9 -0.08 1.01
 3 2 -9 1.12 0.87
 3 2 -9 -0.6 1.04
 -3 -2 9 0.77 0.95
 -3 -2 9 0.62 1.04
 4 2 8 -0.14 0.94
 4 2 8 -0.68 0.84
 4 2 8 -1.07 0.53
 4 2 8 1.12 0.66
 4 2 8 1.51 0.72
 4 2 8 -0.86 0.73
 -4 -2 -8 1.82 0.73
 -4 -2 -8 1.06 0.65
 -4 -2 -8 0.24 0.93
 4 2 7 0.25 0.56
 4 2 7 -0.22 0.42
 4 2 7 0.61 0.53
 4 2 7 0.11 0.65
 4 2 7 -0.38 0.65
 -4 -2 -7 -0.33 0.5
 -4 -2 -7 -1.12 0.64
 -4 -2 -7 0.26 0.54
 -4 -2 -7 0.44 0.5
 -4 -2 -7 0.82 0.73
 4 2 6 10.3 0.61
 4 2 6 10.51 0.96
 4 2 6 10.64 0.95
 4 2 6 12.21 0.87
 4 2 6 9.13 0.85
 -4 -2 -6 11.45 0.95
 -4 -2 -6 10.67 0.77
 -4 -2 -6 11.57 0.98
 -4 -2 -6 9.75 0.95
 -4 -2 -6 12.01 1.18
 -4 -2 -6 9.93 0.8
 4 2 5 72.12 1.77
 4 2 5 67.66 1.73
 4 2 5 70.84 1.7
 4 2 5 70 1.64
 4 2 5 65.72 1.32
 4 2 5 69.84 1.69
 -4 -2 -5 70.19 2.26
 -4 -2 -5 69.02 1.69
 -4 -2 -5 70.31 1.75
 -4 -2 -5 69.84 1.6
 -4 -2 -5 65.71 1.75
 -4 -2 -5 70.04 1.66
 4 2 4 1.84 0.37
 4 2 4 1.93 0.19
 4 2 4 2.06 0.45
 4 2 4 1.38 0.37
 4 2 4 1.39 0.39
 4 2 4 2.09 0.4
 -4 -2 -4 1.76 0.35
 -4 -2 -4 1.69 0.42
 -4 -2 -4 1.72 0.43
 -4 -2 -4 1.86 0.43
 -4 -2 -4 2.45 0.57
 4 2 3 1.99 0.38
 4 2 3 1.12 0.27
 4 2 3 1.9 0.28
 4 2 3 1.67 0.38
 4 2 3 1.38 0.37
 4 2 3 1.53 0.37
 -4 -2 -3 2.03 0.39
 -4 -2 -3 1.4 0.36
 -4 -2 -3 1.84 0.29
 -4 -2 -3 1.27 0.37
 -4 -2 -3 2.22 0.4
 -4 -2 -3 2.06 0.5
 4 2 2 16.64 0.51
 4 2 2 17.52 0.7
 4 2 2 16.55 0.64
 4 2 2 17.17 0.6
 4 2 2 17.03 0.69
 4 2 2 17.93 0.66
 -4 -2 -2 16.9 0.64
 -4 -2 -2 16.8 0.5
 -4 -2 -2 15.92 0.65
 -4 -2 -2 17.52 0.7
 -4 -2 -2 16.52 0.64
 -4 -2 -2 16.79 0.57
 4 2 1 126.26 2.2
 4 2 1 129.6 2.01
 4 2 1 126.48 2.21
 4 2 1 129.65 2.26
 4 2 1 129.11 2.29
 4 2 1 127.19 2.21
 -4 -2 -1 128.25 2.24
 -4 -2 -1 130.08 2.22
 -4 -2 -1 130.42 2.21
 -4 -2 -1 133.88 2.27
 -4 -2 -1 133.32 2.24
 4 2 0 10.06 0.47
 4 2 0 11.45 0.44
 4 2 0 10.66 0.54
 4 2 0 10.35 0.54
 4 2 0 10.26 0.55
 4 2 0 10.78 0.31
 4 2 0 10.81 0.5
 -4 -2 0 11.29 0.48
 -4 -2 0 11.38 0.58
 -4 -2 0 10.79 0.55
 -4 -2 0 10.73 0.55
 -4 -2 0 10.88 0.56
 -4 -2 0 10.96 0.48
 4 2 -1 15.09 0.62
 4 2 -1 16.21 0.62
 4 2 -1 15.92 0.46
 4 2 -1 15.78 0.49
 4 2 -1 16.09 0.52
 4 2 -1 15.4 0.49
 -4 -2 1 16.98 0.5
 -4 -2 1 15.81 0.51
 -4 -2 1 15.51 0.62
 -4 -2 1 15.82 0.48
 -4 -2 1 15.02 0.59
 -4 -2 1 15.53 0.49
 -4 -2 1 15.14 0.58
 4 2 -2 0.2 0.13
 4 2 -2 0.42 0.27
 4 2 -2 0.41 0.33
 4 2 -2 0.11 0.23
 4 2 -2 0.23 0.23
 4 2 -2 -0.01 0.28
 -4 -2 2 0.11 0.16
 -4 -2 2 -0.07 0.22
 -4 -2 2 0.44 0.29
 -4 -2 2 0.26 0.28
 -4 -2 2 0.46 0.27
 -4 -2 2 0.56 0.23
 4 2 -3 36.16 0.94
 4 2 -3 36.97 0.98
 4 2 -3 36.19 0.9
 4 2 -3 37.74 1.02
 4 2 -3 35.73 0.79
 -4 -2 3 35.93 0.91
 -4 -2 3 38.61 1.03
 -4 -2 3 36.85 0.73
 -4 -2 3 35.52 0.9
 4 2 -4 -0.11 0.31
 4 2 -4 -0.29 0.29
 4 2 -4 -0.14 0.32
 4 2 -4 0.07 0.29
 4 2 -4 -0.08 0.27
 -4 -2 4 -0.41 0.33
 -4 -2 4 0.15 0.29
 -4 -2 4 0.21 0.3
 -4 -2 4 -0.22 0.32
 4 2 -5 43.79 1.22
 4 2 -5 45.06 1.17
 4 2 -5 43.5 1.46
 4 2 -5 43.19 1.23
 4 2 -5 45.63 1.34
 4 2 -5 44.37 1.11
 4 2 -5 44.56 1.26
 -4 -2 5 43.79 1.32
 -4 -2 5 43.19 1.2
 -4 -2 5 44.16 1.4
 4 2 -6 1.82 0.53
 4 2 -6 1.9 0.53
 4 2 -6 1.68 0.39
 4 2 -6 2.13 0.48
 4 2 -6 1.98 0.51
 4 2 -6 1.57 0.58
 4 2 -6 2.67 0.52
 -4 -2 6 2.02 0.51
 -4 -2 6 2.35 0.51
 -4 -2 6 2.62 0.58
 4 2 -7 -0.29 0.69
 4 2 -7 0.46 0.57
 4 2 -7 0.3 0.35
 4 2 -7 -0.53 0.46
 4 2 -7 0.15 0.59
 4 2 -7 -0.13 0.56
 4 2 -7 0.77 0.61
 -4 -2 7 -0.69 0.58
 -4 -2 7 -0.39 0.48
 -4 -2 7 0.28 0.64
 -4 -2 7 0.11 0.61
 4 2 -8 2.02 0.78
 4 2 -8 2.16 0.63
 4 2 -8 1 0.97
 4 2 -8 3.2 0.85
 4 2 -8 2.63 0.88
 4 2 -8 2.27 0.74
 -4 -2 8 2.24 0.82
 -4 -2 8 2.83 0.83
 -4 -2 8 1.15 0.81
 -4 -2 8 2.58 0.65
 4 2 -9 7.13 1.27
 4 2 -9 7.7 1.12
 4 2 -9 6.38 1.13
 4 2 -9 6 1.43
 4 2 -9 6.65 1.18
 -4 -2 9 8.32 1.27
 -4 -2 9 7.61 1.21
 5 2 8 -1.48 0.81
 5 2 8 -1.29 1.02
 5 2 8 -0.27 0.91
 -5 -2 -8 -0.32 0.99
 -5 -2 -8 -1.12 0.73
 5 2 7 13.21 1.06
 5 2 7 14.1 1.04
 5 2 7 10.61 1.25
 5 2 7 10.96 1.27
 -5 -2 -7 13.72 1.06
 -5 -2 -7 11.62 1
 -5 -2 -7 12.67 1.42
 -5 -2 -7 12.08 1.26
 -5 -2 -7 12.83 0.98
 5 2 6 4.12 0.63
 5 2 6 3.06 0.6
 5 2 6 3.25 0.57
 5 2 6 2.95 0.58
 5 2 6 2.41 0.66
 -5 -2 -6 2.1 0.61
 -5 -2 -6 2.69 0.59
 -5 -2 -6 1.9 0.64
 -5 -2 -6 2.83 0.5
 -5 -2 -6 2.98 0.58
 -5 -2 -6 2.72 0.59
 5 2 5 1.73 0.44
 5 2 5 0.72 0.42
 5 2 5 2.3 0.48
 5 2 5 1.84 0.45
 5 2 5 1.01 0.48
 -5 -2 -5 1.19 0.46
 -5 -2 -5 1.36 0.4
 -5 -2 -5 0.88 0.56
 -5 -2 -5 0.92 0.45
 -5 -2 -5 1.61 0.51
 -5 -2 -5 2.16 0.54
 5 2 4 2.21 0.45
 5 2 4 1.15 0.42
 5 2 4 2.43 0.48
 5 2 4 1.81 0.36
 5 2 4 1.77 0.43
 -5 -2 -4 2.23 0.46
 -5 -2 -4 2.55 0.46
 -5 -2 -4 1.53 0.37
 -5 -2 -4 2.37 0.47
 -5 -2 -4 2.02 0.54
 5 2 3 71.73 1.43
 5 2 3 71.41 1.61
 5 2 3 72.51 1.62
 5 2 3 72.62 1.49
 5 2 3 72.76 1.6
 5 2 3 73.16 1.6
 -5 -2 -3 74.11 1.59
 -5 -2 -3 76.68 1.44
 -5 -2 -3 71.55 1.45
 -5 -2 -3 76.65 2.12
 -5 -2 -3 74.06 1.6
 -5 -2 -3 72.91 1.63
 -5 -2 -3 75.08 1.63
 5 2 2 0.02 0.32
 5 2 2 0.13 0.33
 5 2 2 0.3 0.3
 5 2 2 -0.25 0.29
 5 2 2 0.28 0.32
 5 2 2 0.05 0.18
 -5 -2 -2 -0.16 0.26
 -5 -2 -2 0.24 0.31
 -5 -2 -2 0 0.32
 -5 -2 -2 0.07 0.33
 -5 -2 -2 -0.07 0.31
 -5 -2 -2 0.67 0.4
 5 2 1 115.36 2.15
 5 2 1 119.61 2.14
 5 2 1 118.3 1.87
 5 2 1 118.8 2.12
 5 2 1 115.29 2.12
 5 2 1 120.28 2.2
 5 2 1 119.13 2.13
 -5 -2 -1 121.54 2.14
 -5 -2 -1 122.55 2.62
 -5 -2 -1 118.17 2.14
 -5 -2 -1 117.58 2.11
 -5 -2 -1 117.29 2.13
 -5 -2 -1 121.29 2.18
 5 2 0 0.14 0.21
 5 2 0 0.15 0.27
 5 2 0 0.2 0.14
 5 2 0 0.25 0.31
 5 2 0 0.27 0.27
 5 2 0 0.37 0.32
 -5 -2 0 0.02 0.3
 -5 -2 0 0.19 0.27
 -5 -2 0 0.09 0.33
 -5 -2 0 0.02 0.28
 -5 -2 0 0.24 0.3
 -5 -2 0 -0.06 0.26
 -5 -2 0 0.11 0.22
 5 2 -1 5.24 0.41
 5 2 -1 5.43 0.38
 5 2 -1 5.41 0.43
 5 2 -1 4.81 0.51
 5 2 -1 4.86 0.38
 5 2 -1 5.38 0.51
 -5 -2 1 5.09 0.5
 -5 -2 1 5.12 0.48
 -5 -2 1 4.56 0.4
 -5 -2 1 5.12 0.23
 -5 -2 1 5.3 0.41
 -5 -2 1 5.66 0.34
 -5 -2 1 4.9 0.52
 5 2 -2 4.61 0.48
 5 2 -2 5.97 0.51
 5 2 -2 5.03 0.32
 5 2 -2 5.2 0.47
 5 2 -2 4.99 0.43
 5 2 -2 4.94 0.47
 -5 -2 2 5.03 0.42
 -5 -2 2 4.83 0.51
 -5 -2 2 5.43 0.48
 -5 -2 2 4.94 0.42
 5 2 -3 201.98 3.33
 5 2 -3 196.96 3.84
 5 2 -3 197.65 3.28
 5 2 -3 194.59 3.42
 5 2 -3 200.07 3.35
 5 2 -3 200.86 3.42
 -5 -2 3 198.11 3.28
 -5 -2 3 199.61 3.4
 -5 -2 3 199.66 3
 -5 -2 3 193.96 3.18
 5 2 -4 2.47 0.41
 5 2 -4 1.75 0.39
 5 2 -4 1.38 0.31
 5 2 -4 1.82 0.35
 -5 -2 4 1.92 0.39
 -5 -2 4 2.2 0.39
 -5 -2 4 1.46 0.35
 -5 -2 4 1.81 0.24
 5 2 -5 0.05 0.35
 5 2 -5 0.74 0.43
 5 2 -5 -0.21 0.37
 5 2 -5 0.37 0.38
 -5 -2 5 0.7 0.4
 -5 -2 5 -0.11 0.38
 -5 -2 5 -0.17 0.43
 -5 -2 5 0.09 0.38
 5 2 -6 6.36 0.68
 5 2 -6 5.78 0.56
 5 2 -6 4.61 0.65
 5 2 -6 5.81 0.68
 5 2 -6 6.11 0.68
 5 2 -6 5.79 0.62
 5 2 -6 5.46 0.64
 -5 -2 6 4.59 0.59
 -5 -2 6 5.87 0.71
 -5 -2 6 6.37 0.68
 5 2 -7 22.16 1.22
 5 2 -7 24.12 0.98
 5 2 -7 24.35 1.26
 5 2 -7 23.36 1.18
 5 2 -7 22.68 1.19
 5 2 -7 25.35 1.16
 5 2 -7 22.99 1.57
 -5 -2 7 26.07 1.45
 -5 -2 7 25.23 1.26
 -5 -2 7 25.08 1.19
 5 2 -8 0.15 0.8
 5 2 -8 -0.64 0.6
 5 2 -8 -1.41 0.65
 5 2 -8 -0.44 0.75
 5 2 -8 -0.29 0.48
 5 2 -8 0.61 0.85
 5 2 -8 -1.21 0.87
 -5 -2 8 0.58 0.61
 -5 -2 8 -1.44 0.74
 -5 -2 8 0.17 0.83
 -5 -2 8 0.84 0.79
 5 2 -9 -0.43 1.29
 5 2 -9 -1.06 1.03
 5 2 -9 -0.89 1.12
 -5 -2 9 -0.49 1.1
 -5 -2 9 -0.05 1.03
 -5 -2 9 0.97 1.16
 6 2 8 -1.25 0.94
 6 2 8 2.08 1.16
 6 2 8 1.19 1
 -6 -2 -8 -0.06 1.06
 6 2 7 1.09 0.61
 6 2 7 1.67 0.83
 6 2 7 0.97 0.74
 -6 -2 -7 0.45 0.62
 -6 -2 -7 0.95 0.61
 -6 -2 -7 0.37 0.84
 -6 -2 -7 -1.26 0.71
 -6 -2 -7 1.46 0.78
 -6 -2 -7 -0.17 0.54
 -6 -2 -7 0.94 0.57
 6 2 6 -0.47 0.48
 6 2 6 -0.11 0.55
 6 2 6 0.79 0.64
 6 2 6 -0.24 0.45
 6 2 6 -0.3 0.48
 -6 -2 -6 0.31 0.48
 -6 -2 -6 -0.56 0.52
 -6 -2 -6 -0.33 0.49
 -6 -2 -6 0.64 0.57
 -6 -2 -6 0.4 0.59
 -6 -2 -6 0.03 0.46
 -6 -2 -6 -0.18 0.61
 6 2 5 0.8 0.53
 6 2 5 -0.19 0.4
 6 2 5 -0.04 0.42
 6 2 5 0.2 0.43
 6 2 5 0.9 0.46
 -6 -2 -5 0.26 0.48
 -6 -2 -5 -0.11 0.45
 -6 -2 -5 0.26 0.45
 -6 -2 -5 0.43 0.39
 -6 -2 -5 0.28 0.45
 -6 -2 -5 0.21 0.58
 6 2 4 16.74 0.75
 6 2 4 15.19 0.87
 6 2 4 17.12 0.89
 6 2 4 17.31 0.88
 6 2 4 15.96 0.86
 6 2 4 16.71 0.71
 -6 -2 -4 16.03 0.7
 -6 -2 -4 17.44 0.88
 -6 -2 -4 16.3 1.12
 -6 -2 -4 15.96 0.9
 -6 -2 -4 15.74 0.8
 -6 -2 -4 16.31 0.87
 6 2 3 49.51 1.31
 6 2 3 50.21 1.29
 6 2 3 51.49 1.22
 6 2 3 53.1 1.37
 6 2 3 51.03 1.11
 6 2 3 52.32 1.33
 -6 -2 -3 49.59 1.29
 -6 -2 -3 50.84 1.31
 -6 -2 -3 49.31 1.16
 -6 -2 -3 51.05 1.31
 -6 -2 -3 53.54 1.38
 -6 -2 -3 52.37 1.71
 6 2 2 -0.16 0.29
 6 2 2 0.08 0.32
 6 2 2 0.09 0.31
 6 2 2 0.31 0.32
 6 2 2 0.65 0.34
 6 2 2 -0.09 0.18
 -6 -2 -2 0.45 0.39
 -6 -2 -2 0.45 0.33
 -6 -2 -2 0.35 0.3
 -6 -2 -2 0.27 0.32
 -6 -2 -2 -0.07 0.32
 -6 -2 -2 0.3 0.31
 6 2 1 150.3 2.73
 6 2 1 146.6 2.6
 6 2 1 145.79 2.61
 6 2 1 146.57 2.63
 6 2 1 146.6 2.33
 6 2 1 147.7 2.63
 -6 -2 -1 152.14 3.21
 -6 -2 -1 149.95 2.61
 -6 -2 -1 149.82 2.62
 -6 -2 -1 150.43 2.69
 -6 -2 -1 147.26 2.64
 -6 -2 -1 147.79 2.64
 6 2 0 34.55 0.93
 6 2 0 34.1 0.81
 6 2 0 34.27 0.97
 6 2 0 34.49 0.7
 6 2 0 35.22 0.9
 6 2 0 33.6 0.95
 -6 -2 0 35.44 0.92
 -6 -2 0 34.11 0.89
 -6 -2 0 33.07 0.96
 -6 -2 0 34.28 0.97
 -6 -2 0 34.16 0.93
 -6 -2 0 34.84 1.01
 6 2 -1 80.08 1.47
 6 2 -1 81.33 1.55
 6 2 -1 79.93 1.69
 6 2 -1 81.71 1.57
 6 2 -1 84.04 1.65
 -6 -2 1 82.64 1.62
 -6 -2 1 81.09 1.56
 -6 -2 1 80.62 1.56
 -6 -2 1 80.65 1.64
 -6 -2 1 79.87 1.61
 -6 -2 1 81.14 1.63
 6 2 -2 0.7 0.28
 6 2 -2 0.47 0.21
 6 2 -2 1.09 0.39
 6 2 -2 0.95 0.3
 6 2 -2 1.19 0.37
 -6 -2 2 0.68 0.32
 -6 -2 2 0.36 0.23
 -6 -2 2 0.6 0.27
 -6 -2 2 1.07 0.27
 -6 -2 2 0.69 0.27
 6 2 -3 -0.38 0.29
 6 2 -3 -0.1 0.13
 6 2 -3 -0.07 0.36
 6 2 -3 0.02 0.32
 6 2 -3 -0.15 0.26
 6 2 -3 0.21 0.27
 -6 -2 3 0.19 0.3
 -6 -2 3 0.06 0.27
 -6 -2 3 -0.03 0.28
 -6 -2 3 0.07 0.29
 -6 -2 3 -0.14 0.31
 6 2 -4 7.11 0.53
 6 2 -4 7.84 0.64
 6 2 -4 7.29 0.6
 6 2 -4 6.33 0.63
 6 2 -4 7.92 0.7
 6 2 -4 7.46 0.47
 -6 -2 4 7.5 0.59
 -6 -2 4 7.98 0.69
 -6 -2 4 7.34 0.36
 -6 -2 4 7.79 0.62
 6 2 -5 3.2 0.5
 6 2 -5 2.7 0.5
 6 2 -5 2.62 0.45
 6 2 -5 2.6 0.48
 -6 -2 5 3.47 0.4
 -6 -2 5 2.92 0.48
 -6 -2 5 2.53 0.52
 -6 -2 5 3.49 0.5
 -6 -2 5 2.99 0.55
 6 2 -6 2.25 0.54
 6 2 -6 1.99 0.53
 6 2 -6 1.6 0.54
 6 2 -6 2.34 0.55
 6 2 -6 2.07 0.56
 -6 -2 6 2.68 0.59
 -6 -2 6 1.71 0.63
 -6 -2 6 3.81 0.6
 -6 -2 6 1.81 0.5
 6 2 -7 5.96 0.72
 6 2 -7 6.57 0.8
 6 2 -7 7.28 0.88
 6 2 -7 6.38 0.7
 6 2 -7 5.54 0.83
 6 2 -7 8.26 0.92
 -6 -2 7 4.86 0.71
 -6 -2 7 7.52 0.85
 -6 -2 7 6.38 0.91
 6 2 -8 1.82 0.83
 6 2 -8 0.09 0.65
 6 2 -8 0.95 0.58
 6 2 -8 0.64 0.85
 6 2 -8 0.75 0.8
 6 2 -8 -0.36 0.9
 -6 -2 8 0.6 0.83
 -6 -2 8 0.46 0.87
 -6 -2 8 2.65 0.66
 6 2 -9 1.45 1.19
 6 2 -9 1.35 1.11
 -6 -2 9 0.24 1.19
 -6 -2 9 0.56 1.18
 -6 -2 9 -0.02 1.15
 7 2 7 1.45 0.64
 7 2 7 1.5 0.86
 7 2 7 1.67 0.64
 7 2 7 1.66 0.64
 7 2 7 1.55 0.92
 -7 -2 -7 0.15 0.82
 -7 -2 -7 0.63 0.93
 -7 -2 -7 2.11 0.64
 -7 -2 -7 1.34 0.71
 -7 -2 -7 1.34 0.7
 7 2 6 1.09 0.53
 7 2 6 0.61 0.6
 7 2 6 0.1 0.52
 7 2 6 1.6 0.7
 7 2 6 0.67 0.55
 -7 -2 -6 0.81 0.69
 -7 -2 -6 -0.5 0.63
 -7 -2 -6 1.77 0.57
 -7 -2 -6 1.22 0.52
 -7 -2 -6 1.4 0.53
 -7 -2 -6 2.24 0.56
 7 2 5 6.51 0.79
 7 2 5 7.71 0.85
 7 2 5 5.86 0.65
 7 2 5 6.61 0.74
 7 2 5 6.94 0.75
 -7 -2 -5 7.48 0.71
 -7 -2 -5 5.28 0.79
 -7 -2 -5 7.63 0.92
 -7 -2 -5 8.62 0.75
 -7 -2 -5 6.18 0.76
 7 2 4 4.97 0.62
 7 2 4 4.83 0.6
 7 2 4 4.29 0.59
 7 2 4 4.45 0.54
 7 2 4 4.52 0.45
 7 2 4 5.07 0.64
 -7 -2 -4 4.81 0.61
 -7 -2 -4 5.13 0.62
 -7 -2 -4 4.88 0.58
 -7 -2 -4 2.98 0.65
 -7 -2 -4 6.19 0.72
 -7 -2 -4 4.1 0.6
 7 2 3 47.06 1.34
 7 2 3 47.17 1.34
 7 2 3 47.93 1.33
 7 2 3 45.39 1.05
 7 2 3 46.91 1.22
 7 2 3 49.46 1.34
 -7 -2 -3 46.29 1.65
 -7 -2 -3 44.98 1.15
 -7 -2 -3 47.1 1.34
 -7 -2 -3 49.56 1.34
 -7 -2 -3 45.93 1.28
 -7 -2 -3 46.55 1.31
 7 2 2 2.53 0.4
 7 2 2 2.78 0.43
 7 2 2 2.34 0.24
 7 2 2 2.28 0.41
 7 2 2 2.89 0.45
 7 2 2 2.87 0.45
 -7 -2 -2 2.93 0.4
 -7 -2 -2 2.02 0.44
 -7 -2 -2 2.59 0.43
 -7 -2 -2 1.77 0.4
 -7 -2 -2 2.13 0.39
 -7 -2 -2 2.78 0.46
 7 2 1 45.28 1.22
 7 2 1 46.97 1.16
 7 2 1 45.99 0.88
 7 2 1 46.93 1.21
 7 2 1 46.59 1.19
 7 2 1 45.79 1.2
 -7 -2 -1 47.99 1.2
 -7 -2 -1 46.45 1.16
 -7 -2 -1 47.11 1.19
 -7 -2 -1 47.73 1.39
 -7 -2 -1 48.31 1.26
 -7 -2 -1 48.17 1.27
 7 2 0 4.29 0.51
 7 2 0 4.46 0.4
 7 2 0 5.23 0.5
 7 2 0 4.68 0.34
 7 2 0 4.72 0.46
 7 2 0 4.71 0.54
 -7 -2 0 5.03 0.61
 -7 -2 0 5.11 0.52
 -7 -2 0 4.67 0.48
 -7 -2 0 3.45 0.39
 -7 -2 0 4.27 0.52
 -7 -2 0 4.55 0.52
 7 2 -1 0.8 0.33
 7 2 -1 0.49 0.39
 7 2 -1 0.76 0.3
 7 2 -1 0.69 0.34
 7 2 -1 0.68 0.25
 -7 -2 1 0.86 0.37
 -7 -2 1 0.75 0.38
 -7 -2 1 0.75 0.31
 -7 -2 1 0.36 0.31
 -7 -2 1 0.51 0.18
 -7 -2 1 0.64 0.36
 7 2 -2 13.77 0.64
 7 2 -2 14.12 0.79
 7 2 -2 13.63 0.62
 7 2 -2 14.38 0.73
 7 2 -2 12.88 0.5
 -7 -2 2 13.83 0.63
 -7 -2 2 13.28 0.74
 -7 -2 2 14.13 0.7
 -7 -2 2 12.75 0.62
 -7 -2 2 13.73 0.51
 7 2 -3 2.41 0.36
 7 2 -3 3.16 0.45
 7 2 -3 3.93 0.42
 7 2 -3 3.03 0.41
 7 2 -3 3.31 0.48
 -7 -2 3 2.7 0.39
 -7 -2 3 2.83 0.39
 -7 -2 3 3.61 0.46
 -7 -2 3 3.07 0.41
 -7 -2 3 2.77 0.39
 7 2 -4 4.66 0.5
 7 2 -4 4.74 0.56
 7 2 -4 4.31 0.39
 7 2 -4 3.55 0.49
 7 2 -4 4.2 0.5
 7 2 -4 3.75 0.38
 -7 -2 4 5.02 0.59
 -7 -2 4 3.86 0.51
 -7 -2 4 3.9 0.46
 -7 -2 4 4.23 0.5
 7 2 -5 4.71 0.64
 7 2 -5 4.56 0.55
 7 2 -5 4.26 0.64
 7 2 -5 4.49 0.55
 7 2 -5 5.16 0.62
 -7 -2 5 4.3 0.55
 -7 -2 5 5.04 0.57
 -7 -2 5 4.6 0.6
 -7 -2 5 4.78 0.37
 7 2 -6 0.81 0.52
 7 2 -6 0.47 0.52
 7 2 -6 -0.29 0.47
 7 2 -6 0.19 0.51
 7 2 -6 -0.06 0.47
 7 2 -6 -0.13 0.57
 -7 -2 6 0.55 0.61
 -7 -2 6 0.5 0.47
 -7 -2 6 0.39 0.28
 -7 -2 6 0.38 0.55
 -7 -2 6 -0.18 0.54
 7 2 -7 0.5 0.64
 7 2 -7 -0.47 0.62
 7 2 -7 0.97 0.73
 7 2 -7 -1.17 0.6
 7 2 -7 -0.95 0.51
 7 2 -7 -0.39 0.63
 7 2 -7 -1.22 0.57
 -7 -2 7 -0.46 0.53
 -7 -2 7 -0.19 0.35
 -7 -2 7 0.47 0.71
 -7 -2 7 1.11 0.78
 7 2 -8 -0.52 0.81
 7 2 -8 -0.18 0.71
 7 2 -8 -1.01 0.82
 7 2 -8 1.3 0.73
 7 2 -8 -0.22 0.91
 7 2 -8 -1.41 0.78
 7 2 -8 0.29 0.68
 -7 -2 8 0.09 0.47
 -7 -2 8 0.29 0.93
 -7 -2 8 -0.03 0.92
 -7 -2 8 -0.74 0.66
 8 2 7 -0.71 0.65
 8 2 7 0.42 0.84
 8 2 7 1.43 0.74
 8 2 7 0.63 0.98
 -8 -2 -7 -0.67 0.7
 -8 -2 -7 0.74 0.64
 -8 -2 -7 -1.52 0.97
 -8 -2 -7 -0.85 0.77
 8 2 6 -0.02 0.76
 8 2 6 2.11 0.63
 8 2 6 -1.01 0.56
 8 2 6 0.38 0.62
 8 2 6 1.11 0.61
 -8 -2 -6 1.62 0.59
 -8 -2 -6 1.45 0.76
 -8 -2 -6 -1.5 0.66
 -8 -2 -6 -0.77 0.54
 -8 -2 -6 0.95 0.56
 8 2 5 10.98 1.07
 8 2 5 10.59 0.84
 8 2 5 9.78 0.84
 8 2 5 9.96 0.96
 8 2 5 10.89 0.85
 8 2 5 9.06 0.89
 -8 -2 -5 12.9 1.03
 -8 -2 -5 10.16 1.07
 -8 -2 -5 10.03 0.82
 -8 -2 -5 8 1.19
 -8 -2 -5 9.49 0.83
 8 2 4 1.34 0.47
 8 2 4 0.39 0.44
 8 2 4 0.56 0.36
 8 2 4 0.42 0.44
 8 2 4 0.51 0.44
 8 2 4 0.45 0.5
 -8 -2 -4 0.43 0.48
 -8 -2 -4 -0.19 0.48
 -8 -2 -4 0.65 0.61
 -8 -2 -4 0.67 0.42
 -8 -2 -4 0.17 0.39
 -8 -2 -4 0.85 0.44
 8 2 3 10.68 0.78
 8 2 3 10.09 0.57
 8 2 3 10.76 0.81
 8 2 3 9.72 0.75
 8 2 3 8.33 0.77
 8 2 3 10.61 0.74
 -8 -2 -3 11.74 0.83
 -8 -2 -3 10.71 0.71
 -8 -2 -3 10.87 1.04
 -8 -2 -3 10.7 0.79
 -8 -2 -3 10.68 0.71
 -8 -2 -3 10.59 0.81
 8 2 2 6.74 0.4
 8 2 2 6.26 0.6
 8 2 2 8.44 0.72
 8 2 2 7.28 0.68
 8 2 2 7.14 0.63
 -8 -2 -2 7.11 0.63
 -8 -2 -2 6.25 0.62
 -8 -2 -2 6.72 0.83
 -8 -2 -2 9.01 0.74
 -8 -2 -2 7.92 0.67
 -8 -2 -2 6.41 0.71
 8 2 1 4.93 0.59
 8 2 1 4.66 0.57
 8 2 1 5.52 0.62
 8 2 1 5.91 0.57
 8 2 1 5.03 0.58
 -8 -2 -1 6.15 0.61
 -8 -2 -1 5.94 0.6
 -8 -2 -1 4.77 0.57
 -8 -2 -1 5.36 0.69
 -8 -2 -1 5.81 0.56
 -8 -2 -1 6.56 0.61
 8 2 0 0.1 0.32
 8 2 0 -0.02 0.36
 8 2 0 -0.32 0.35
 8 2 0 0.12 0.2
 8 2 0 0.11 0.23
 8 2 0 0.16 0.31
 -8 -2 0 -0.29 0.26
 -8 -2 0 0.01 0.3
 -8 -2 0 0.2 0.35
 -8 -2 0 -0.34 0.34
 -8 -2 0 0.2 0.3
 -8 -2 0 -0.34 0.35
 8 2 -1 38.88 0.93
 8 2 -1 39.25 1.06
 8 2 -1 39.17 1.19
 8 2 -1 38.51 1.08
 -8 -2 1 38.11 1.08
 -8 -2 1 40.39 1.08
 -8 -2 1 41.35 1.2
 -8 -2 1 39.68 1.07
 -8 -2 1 39.35 0.95
 -8 -2 1 39.94 1.12
 8 2 -2 25.04 0.91
 8 2 -2 24.45 0.7
 8 2 -2 23.15 0.83
 8 2 -2 24.63 0.82
 8 2 -2 26.05 1
 -8 -2 2 24.1 0.83
 -8 -2 2 25.15 0.86
 -8 -2 2 23.18 0.88
 -8 -2 2 24.34 0.91
 -8 -2 2 24.12 0.66
 8 2 -3 26.41 0.93
 8 2 -3 25.44 1.01
 8 2 -3 26.81 0.95
 8 2 -3 26.66 0.96
 8 2 -3 25.61 0.9
 -8 -2 3 27.62 0.91
 -8 -2 3 25.53 0.93
 -8 -2 3 26.43 0.79
 -8 -2 3 26.32 0.89
 8 2 -4 0.13 0.39
 8 2 -4 0.34 0.42
 8 2 -4 0.18 0.41
 8 2 -4 -0.04 0.35
 8 2 -4 -0.3 0.36
 -8 -2 4 -0.05 0.37
 -8 -2 4 -0.31 0.34
 -8 -2 4 -0.29 0.37
 -8 -2 4 0 0.38
 8 2 -5 14.19 0.91
 8 2 -5 14.08 0.66
 8 2 -5 15.53 1.02
 8 2 -5 14.27 0.9
 8 2 -5 13.54 0.66
 8 2 -5 14.05 0.91
 -8 -2 5 14.65 0.93
 -8 -2 5 13.38 0.95
 -8 -2 5 13.83 0.89
 -8 -2 5 14.85 0.91
 8 2 -6 2.26 0.62
 8 2 -6 2.34 0.6
 8 2 -6 1.87 0.66
 8 2 -6 2.35 0.49
 8 2 -6 2.2 0.6
 8 2 -6 3.66 0.65
 -8 -2 6 2.07 0.66
 -8 -2 6 2.99 0.66
 -8 -2 6 3.35 0.63
 -8 -2 6 1.03 0.55
 8 2 -7 3.81 0.83
 8 2 -7 3.23 0.74
 8 2 -7 4 0.81
 8 2 -7 5.09 0.78
 8 2 -7 3.05 0.7
 8 2 -7 3.33 0.77
 -8 -2 7 3.54 0.78
 -8 -2 7 2.93 0.8
 -8 -2 7 2.92 0.68
 -8 -2 7 3.91 0.93
 8 2 -8 0.8 0.91
 8 2 -8 -0.44 0.84
 8 2 -8 -0.93 0.86
 8 2 -8 -0.94 0.86
 8 2 -8 -0.91 0.68
 8 2 -8 -1.52 0.9
 8 2 -8 1.31 0.77
 -8 -2 8 0.32 1.02
 -8 -2 8 -1.06 0.89
 9 2 7 2.24 0.95
 9 2 7 1.63 1.17
 -9 -2 -7 3.15 1.19
 -9 -2 -7 3.61 0.98
 9 2 6 -0.14 0.66
 9 2 6 -0.18 0.58
 9 2 6 -1.48 0.6
 9 2 6 0.91 0.82
 9 2 6 1.18 0.65
 -9 -2 -6 0.32 0.57
 -9 -2 -6 -0.18 0.83
 -9 -2 -6 -1.03 0.66
 -9 -2 -6 0.24 0.59
 9 2 5 10.73 0.98
 9 2 5 10.76 0.91
 9 2 5 8.04 0.91
 9 2 5 10.57 0.97
 9 2 5 9.7 1.15
 9 2 5 9.67 0.89
 -9 -2 -5 9.51 0.88
 -9 -2 -5 6.45 0.97
 -9 -2 -5 9.77 0.91
 -9 -2 -5 9.33 0.96
 -9 -2 -5 9.76 0.96
 -9 -2 -5 10.57 1.2
 9 2 4 1.66 0.41
 9 2 4 2.49 0.55
 9 2 4 1.86 0.53
 9 2 4 0.75 0.54
 9 2 4 1.15 0.5
 9 2 4 1.15 0.57
 -9 -2 -4 0.52 0.65
 -9 -2 -4 1.55 0.5
 -9 -2 -4 1.69 0.47
 -9 -2 -4 1.21 0.49
 -9 -2 -4 1.63 0.57
 -9 -2 -4 1.34 0.6
 9 2 3 1.24 0.5
 9 2 3 1.02 0.48
 9 2 3 0.42 0.44
 9 2 3 0.97 0.3
 9 2 3 0.05 0.48
 9 2 3 0.25 0.5
 -9 -2 -3 1.3 0.52
 -9 -2 -3 0.68 0.42
 -9 -2 -3 1.16 0.53
 -9 -2 -3 0.66 0.58
 -9 -2 -3 0.12 0.44
 -9 -2 -3 0.36 0.46
 9 2 2 0.34 0.42
 9 2 2 0.08 0.38
 9 2 2 0.02 0.38
 9 2 2 0.08 0.21
 9 2 2 -0.23 0.38
 -9 -2 -2 0.04 0.4
 -9 -2 -2 -0.44 0.43
 -9 -2 -2 -0.37 0.37
 -9 -2 -2 -0.48 0.4
 9 2 1 46.69 1.27
 9 2 1 46.63 1.33
 9 2 1 45.6 1.3
 9 2 1 45.42 1.33
 9 2 1 45.53 1.36
 -9 -2 -1 45.22 1.25
 -9 -2 -1 46.34 1.34
 -9 -2 -1 47.95 1.31
 -9 -2 -1 46.86 1.49
 -9 -2 -1 48.3 1.33
 -9 -2 -1 46.39 1.36
 9 2 0 20.26 0.62
 9 2 0 22.1 0.95
 9 2 0 20.22 0.66
 9 2 0 21.53 0.92
 9 2 0 20.9 0.89
 9 2 0 20.2 0.86
 9 2 0 20.36 0.89
 -9 -2 0 20.5 0.93
 -9 -2 0 20.78 0.94
 -9 -2 0 20 0.86
 -9 -2 0 21.14 0.89
 -9 -2 0 21.45 0.88
 -9 -2 0 20.83 0.88
 9 2 -1 3.26 0.53
 9 2 -1 4.51 0.49
 9 2 -1 3.68 0.48
 9 2 -1 4.96 0.51
 -9 -2 1 4.58 0.54
 -9 -2 1 4.05 0.42
 -9 -2 1 4.23 0.5
 -9 -2 1 3.05 0.47
 -9 -2 1 4.14 0.51
 -9 -2 1 3.51 0.48
 9 2 -2 0.56 0.37
 9 2 -2 0.57 0.31
 9 2 -2 0.16 0.41
 9 2 -2 0.79 0.35
 9 2 -2 0.6 0.43
 9 2 -2 0.5 0.4
 -9 -2 2 0.61 0.36
 -9 -2 2 0.47 0.38
 -9 -2 2 0.63 0.4
 -9 -2 2 0.53 0.38
 9 2 -3 44.88 1.24
 9 2 -3 44.68 1.4
 9 2 -3 45.29 1.3
 9 2 -3 46.08 1.26
 9 2 -3 45.83 1.34
 -9 -2 3 43.19 1.05
 -9 -2 3 45.02 1.23
 -9 -2 3 44.47 1.32
 -9 -2 3 46.03 1.24
 -9 -2 3 43.48 1.29
 9 2 -4 1.59 0.45
 9 2 -4 1.52 0.53
 9 2 -4 1.32 0.48
 9 2 -4 2.21 0.5
 9 2 -4 3.42 0.61
 -9 -2 4 2.11 0.48
 -9 -2 4 2.02 0.49
 -9 -2 4 2.02 0.48
 -9 -2 4 2.01 0.53
 9 2 -5 0.04 0.39
 9 2 -5 0.71 0.53
 9 2 -5 -0.58 0.45
 9 2 -5 0.05 0.58
 9 2 -5 0.59 0.51
 -9 -2 5 0.93 0.54
 -9 -2 5 0.2 0.51
 -9 -2 5 0.34 0.51
 9 2 -6 -0.48 0.65
 9 2 -6 0.4 0.5
 9 2 -6 0.24 0.7
 9 2 -6 -1.13 0.64
 9 2 -6 -0.15 0.6
 9 2 -6 0.06 0.35
 -9 -2 6 -0.34 0.58
 -9 -2 6 -0.26 0.59
 -9 -2 6 -0.05 0.65
 -9 -2 6 0.24 0.6
 9 2 -7 0.94 0.58
 9 2 -7 -0.16 0.73
 9 2 -7 0.58 0.62
 9 2 -7 2.07 0.83
 9 2 -7 -0.25 0.86
 9 2 -7 0.21 0.68
 -9 -2 7 0.24 0.75
 -9 -2 7 0.62 0.75
 -9 -2 7 0.7 0.85
 -9 -2 7 -0.65 0.73
 -9 -2 7 0.4 0.68
 9 2 -8 -0.81 1.02
 9 2 -8 0.84 0.96
 9 2 -8 -0.1 0.99
 9 2 -8 0.89 1.04
 9 2 -8 0.51 0.84
 -9 -2 8 0.58 0.82
 -9 -2 8 0.74 1.03
 -9 -2 8 1.89 1.16
 10 2 6 0.5 0.74
 10 2 6 0.79 0.75
 10 2 6 0.71 0.74
 10 2 6 -0.57 0.73
 10 2 6 0.33 0.98
 -10 -2 -6 0.88 0.72
 -10 -2 -6 -0.46 0.72
 -10 -2 -6 -0.63 0.99
 10 2 5 1.98 0.68
 10 2 5 0.69 0.74
 10 2 5 1.03 0.68
 10 2 5 0.58 0.53
 10 2 5 1.52 0.67
 10 2 5 0.67 0.61
 -10 -2 -5 1.07 0.63
 -10 -2 -5 -0.79 0.79
 -10 -2 -5 0.05 0.84
 -10 -2 -5 -0.75 0.61
 -10 -2 -5 1.21 0.63
 10 2 4 -0.25 0.58
 10 2 4 0.58 0.52
 10 2 4 0.14 0.39
 10 2 4 0.01 0.63
 10 2 4 0.68 0.56
 10 2 4 1.47 0.58
 -10 -2 -4 0.3 0.52
 -10 -2 -4 0.26 0.54
 -10 -2 -4 0.27 0.64
 -10 -2 -4 -0.72 0.7
 -10 -2 -4 -0.15 0.52
 10 2 3 30.9 1.26
 10 2 3 30.32 1.26
 10 2 3 33.55 1.3
 10 2 3 30.15 0.86
 10 2 3 30.58 1.27
 -10 -2 -3 31.73 1.26
 -10 -2 -3 31.74 1.3
 -10 -2 -3 33.05 1.23
 -10 -2 -3 32.66 1.34
 -10 -2 -3 30.84 1.64
 10 2 2 5.6 0.67
 10 2 2 5.07 0.66
 10 2 2 5.71 0.63
 10 2 2 4.7 0.42
 10 2 2 5.24 0.61
 -10 -2 -2 5.09 0.73
 -10 -2 -2 3.55 0.57
 -10 -2 -2 4.69 0.62
 -10 -2 -2 3.58 0.58
 -10 -2 -2 4.02 0.58
 10 2 1 0.85 0.47
 10 2 1 -0.05 0.22
 10 2 1 -0.06 0.4
 10 2 1 0.29 0.43
 10 2 1 -0.01 0.48
 10 2 1 0.2 0.42
 -10 -2 -1 -0.15 0.44
 -10 -2 -1 -0.23 0.43
 -10 -2 -1 0.13 0.43
 -10 -2 -1 -0.8 0.42
 -10 -2 -1 0.69 0.42
 -10 -2 -1 -0.43 0.41
 10 2 0 8.11 0.75
 10 2 0 7.97 0.79
 10 2 0 7.56 0.49
 10 2 0 8.24 0.51
 10 2 0 9.01 0.76
 10 2 0 8.03 0.74
 10 2 0 9.95 0.76
 -10 -2 0 9.26 0.76
 -10 -2 0 8.5 0.79
 -10 -2 0 7.81 0.77
 -10 -2 0 7.78 0.79
 -10 -2 0 8.22 0.77
 -10 -2 0 7.5 0.73
 10 2 -1 21.06 0.98
 10 2 -1 21.76 0.94
 10 2 -1 22.79 0.79
 10 2 -1 23.58 1.02
 -10 -2 1 22.28 0.98
 -10 -2 1 23.23 1.01
 -10 -2 1 23.1 0.99
 -10 -2 1 22.58 0.76
 -10 -2 1 22.36 0.96
 -10 -2 1 22.97 0.94
 -10 -2 1 23.78 1.04
 10 2 -2 1.19 0.49
 10 2 -2 1.52 0.51
 10 2 -2 1.18 0.37
 10 2 -2 1.01 0.39
 10 2 -2 0.78 0.47
 10 2 -2 1.25 0.45
 -10 -2 2 1.24 0.48
 -10 -2 2 1.92 0.49
 -10 -2 2 1.25 0.47
 -10 -2 2 1.53 0.46
 10 2 -3 7.79 0.86
 10 2 -3 8.96 0.55
 10 2 -3 9.39 0.81
 10 2 -3 9.73 0.84
 10 2 -3 8.06 0.89
 10 2 -3 10.18 0.8
 -10 -2 3 8.88 0.78
 -10 -2 3 9.52 0.81
 -10 -2 3 8.7 0.77
 -10 -2 3 8.56 0.77
 -10 -2 3 8.96 0.53
 10 2 -4 3.39 0.59
 10 2 -4 2.55 0.54
 10 2 -4 1.62 0.57
 10 2 -4 2.14 0.55
 10 2 -4 3.29 0.62
 -10 -2 4 2.64 0.59
 -10 -2 4 2.42 0.44
 -10 -2 4 2.62 0.61
 -10 -2 4 1.98 0.54
 -10 -2 4 2.48 0.53
 -10 -2 4 3.05 0.58
 10 2 -5 0.58 0.61
 10 2 -5 0.58 0.48
 10 2 -5 2.08 0.63
 10 2 -5 0.24 0.63
 10 2 -5 1.03 0.57
 10 2 -5 0.95 0.58
 -10 -2 5 0.73 0.6
 -10 -2 5 1.19 0.63
 -10 -2 5 1.74 0.61
 10 2 -6 2.71 0.71
 10 2 -6 1.5 0.73
 10 2 -6 3.43 0.9
 10 2 -6 3.69 0.79
 10 2 -6 2.25 0.67
 10 2 -6 2.36 0.81
 -10 -2 6 2.56 0.74
 -10 -2 6 2.16 0.71
 -10 -2 6 1.53 0.69
 10 2 -7 21.35 1.65
 10 2 -7 21.1 1.57
 10 2 -7 20.37 0.88
 10 2 -7 19.59 1.73
 10 2 -7 24.97 1.64
 10 2 -7 21.24 1.46
 10 2 -7 21.68 1.25
 -10 -2 7 22.44 1.53
 -10 -2 7 21.95 1.85
 -10 -2 7 24.05 1.51
 -10 -2 7 21.28 1.54
 10 2 -8 2.28 1.44
 10 2 -8 0.29 1.12
 10 2 -8 0.15 1.07
 10 2 -8 -0.1 1.13
 10 2 -8 -0.11 1.15
 -10 -2 8 -0.43 1
 -10 -2 8 1.72 1.1
 -10 -2 8 -1.77 1.23
 11 2 6 -1.21 1.08
 11 2 6 0.84 0.78
 -11 -2 -6 0.6 1.12
 11 2 5 12.17 1.23
 11 2 5 11.74 1.29
 11 2 5 8.76 1.01
 11 2 5 11.24 1.32
 11 2 5 10.82 1.14
 11 2 5 12.5 1.17
 -11 -2 -5 8.86 1.34
 -11 -2 -5 12.69 1.54
 -11 -2 -5 10.01 1
 -11 -2 -5 10.4 1.07
 -11 -2 -5 9.95 1.22
 11 2 4 0.68 0.7
 11 2 4 -0.59 0.66
 11 2 4 0.59 0.56
 11 2 4 -0.09 0.42
 11 2 4 0.14 0.68
 -11 -2 -4 -0.26 0.63
 -11 -2 -4 -1.05 0.76
 -11 -2 -4 0.08 0.62
 -11 -2 -4 -0.8 0.78
 -11 -2 -4 0.55 0.69
 11 2 3 3.79 0.4
 11 2 3 4.83 0.72
 11 2 3 3.78 0.7
 11 2 3 3.18 0.6
 11 2 3 3.5 0.7
 -11 -2 -3 4.42 0.79
 -11 -2 -3 4.15 0.88
 -11 -2 -3 4.57 0.72
 -11 -2 -3 4.04 0.66
 -11 -2 -3 4.54 0.7
 11 2 2 -0.42 0.24
 11 2 2 0.04 0.54
 11 2 2 -0.26 0.46
 11 2 2 0.19 0.5
 11 2 2 0.69 0.57
 -11 -2 -2 -0.15 0.49
 -11 -2 -2 0.07 0.56
 -11 -2 -2 -0.82 0.47
 -11 -2 -2 0.22 0.52
 -11 -2 -2 -0.83 0.56
 -11 -2 -2 -0.44 0.5
 11 2 1 13.47 0.98
 11 2 1 13.8 0.93
 11 2 1 14.52 0.55
 11 2 1 12.83 1
 11 2 1 14.5 0.75
 11 2 1 14.31 0.98
 11 2 1 13.55 0.91
 11 2 1 14.01 0.57
 -11 -2 -1 13.78 0.94
 -11 -2 -1 13.55 0.93
 -11 -2 -1 14.15 0.93
 -11 -2 -1 14.39 0.99
 -11 -2 -1 14.67 0.94
 -11 -2 -1 14.74 1.1
 11 2 0 15.26 0.64
 11 2 0 15.57 0.93
 11 2 0 16.82 1.03
 11 2 0 15.26 0.98
 11 2 0 15.35 0.91
 11 2 0 15.08 0.99
 11 2 0 15.64 0.6
 -11 -2 0 16.45 0.93
 -11 -2 0 16.31 0.95
 -11 -2 0 14.45 0.94
 -11 -2 0 15.71 0.96
 -11 -2 0 16.15 0.97
 -11 -2 0 15.89 0.95
 11 2 -1 49.73 1.44
 11 2 -1 44.94 1.49
 11 2 -1 50.97 1.23
 11 2 -1 53.58 1.54
 -11 -2 1 51.16 1.47
 -11 -2 1 52.62 1.56
 -11 -2 1 50.72 1.29
 -11 -2 1 50.52 1.49
 -11 -2 1 50.38 1.51
 -11 -2 1 49.99 1.48
 -11 -2 1 50.09 1.47
 11 2 -2 1.62 0.58
 11 2 -2 1.82 0.62
 11 2 -2 0.99 0.41
 11 2 -2 0.96 0.49
 11 2 -2 1.47 0.45
 11 2 -2 0.28 0.53
 -11 -2 2 0.68 0.52
 -11 -2 2 0.83 0.49
 -11 -2 2 1.42 0.52
 -11 -2 2 1.66 0.52
 11 2 -3 3.73 0.7
 11 2 -3 2.79 0.41
 11 2 -3 2.22 0.61
 11 2 -3 3.67 0.58
 11 2 -3 3.4 0.59
 11 2 -3 3.32 0.67
 -11 -2 3 3.3 0.65
 -11 -2 3 2.89 0.59
 -11 -2 3 3.53 0.62
 -11 -2 3 3.3 0.6
 11 2 -4 19.1 1.16
 11 2 -4 18.98 1.14
 11 2 -4 20.57 1.14
 11 2 -4 21.12 1.08
 11 2 -4 20.85 1.08
 -11 -2 4 19.7 1.11
 -11 -2 4 20.04 1.14
 -11 -2 4 20.85 1.15
 -11 -2 4 20.75 0.8
 -11 -2 4 20.45 1.1
 -11 -2 4 19.16 1.1
 11 2 -5 19.04 1.18
 11 2 -5 18.91 1.36
 11 2 -5 20.08 1.13
 11 2 -5 22.37 1.44
 11 2 -5 20.31 1.23
 11 2 -5 21.89 1.14
 -11 -2 5 20.63 1.22
 -11 -2 5 20.41 1.22
 -11 -2 5 21.36 1.25
 -11 -2 5 19.04 1
 11 2 -6 -0.66 0.9
 11 2 -6 1.08 0.83
 11 2 -6 -0.12 0.51
 11 2 -6 1.43 0.75
 11 2 -6 0.17 0.64
 11 2 -6 0.6 0.79
 11 2 -6 -0.29 0.78
 -11 -2 6 1.09 0.78
 -11 -2 6 0.36 0.7
 -11 -2 6 -0.01 0.74
 11 2 -7 1.22 0.9
 11 2 -7 0.25 1.12
 11 2 -7 1.04 0.94
 11 2 -7 1 0.98
 11 2 -7 0.76 1.02
 11 2 -7 -0.28 0.68
 -11 -2 7 -0.45 0.9
 -11 -2 7 0.1 0.92
 -11 -2 7 -0.7 1.02
 -11 -2 7 0.35 0.95
 12 2 5 14.02 1.59
 12 2 5 13.58 1.45
 12 2 5 10.78 1.07
 -12 -2 -5 12.17 1.34
 -12 -2 -5 15.25 1.52
 -12 -2 -5 14.46 1.56
 -12 -2 -5 9.69 1.47
 -12 -2 -5 11.86 1.3
 12 2 4 2.06 0.89
 12 2 4 2.9 0.77
 12 2 4 2.5 0.78
 12 2 4 2.83 0.49
 12 2 4 4.72 0.82
 -12 -2 -4 0.92 1.01
 -12 -2 -4 2.42 0.78
 -12 -2 -4 1.71 0.91
 -12 -2 -4 1.47 0.79
 -12 -2 -4 1.05 0.71
 12 2 3 1.04 0.35
 12 2 3 2.33 0.7
 12 2 3 2.39 0.78
 12 2 3 1.72 0.56
 12 2 3 1.62 0.69
 -12 -2 -3 1.78 0.79
 -12 -2 -3 1.95 0.76
 -12 -2 -3 0.83 0.84
 -12 -2 -3 2.14 0.7
 -12 -2 -3 0.93 0.62
 -12 -2 -3 1.5 0.6
 12 2 2 12.55 0.95
 12 2 2 14.08 1.15
 12 2 2 11.44 0.54
 12 2 2 13.49 1.12
 12 2 2 14 1.16
 -12 -2 -2 9.33 1.04
 -12 -2 -2 11.47 1.13
 -12 -2 -2 12.29 1.11
 -12 -2 -2 13.85 1.37
 -12 -2 -2 13.26 1.14
 -12 -2 -2 11.01 1.05
 12 2 1 39.51 1.4
 12 2 1 35.81 1.46
 12 2 1 36.81 1.1
 12 2 1 38.27 1.42
 12 2 1 35.68 1.42
 12 2 1 36.21 0.86
 12 2 1 36.42 1.37
 12 2 1 36.32 0.89
 -12 -2 -1 37.74 1.58
 -12 -2 -1 35.42 1.39
 -12 -2 -1 37.91 1.36
 -12 -2 -1 37.76 1.37
 -12 -2 -1 36.69 1.41
 -12 -2 -1 36.18 1.43
 12 2 0 2.19 0.38
 12 2 0 1.41 0.51
 12 2 0 1.96 0.68
 12 2 0 1.16 0.56
 12 2 0 2 0.62
 12 2 0 2.66 0.6
 -12 -2 0 3.07 0.67
 -12 -2 0 1.49 0.51
 -12 -2 0 1.84 0.56
 -12 -2 0 2.46 0.63
 -12 -2 0 2.7 0.65
 -12 -2 0 2.13 0.55
 12 2 -1 0.95 0.55
 12 2 -1 0.41 0.55
 12 2 -1 0.31 0.55
 12 2 -1 0.5 0.39
 12 2 -1 0.42 0.54
 -12 -2 1 -0.55 0.5
 -12 -2 1 1.11 0.61
 -12 -2 1 -0.25 0.44
 -12 -2 1 0.17 0.33
 -12 -2 1 -0.3 0.53
 -12 -2 1 -0.14 0.53
 -12 -2 1 -0.29 0.44
 12 2 -2 11.56 0.88
 12 2 -2 10.24 0.99
 12 2 -2 9.93 1.05
 12 2 -2 10.86 0.79
 12 2 -2 10.78 0.94
 -12 -2 2 11.76 0.99
 -12 -2 2 10.59 1
 -12 -2 2 11.1 1
 -12 -2 2 11.99 0.91
 12 2 -3 2.92 0.73
 12 2 -3 3.3 0.66
 12 2 -3 3.13 0.47
 12 2 -3 3.24 0.77
 12 2 -3 2.92 0.66
 12 2 -3 3.3 0.61
 -12 -2 3 2.91 0.65
 -12 -2 3 2.74 0.66
 -12 -2 3 3.03 0.66
 -12 -2 3 3.45 0.7
 12 2 -4 5.16 0.81
 12 2 -4 5.74 0.77
 12 2 -4 3.65 0.76
 12 2 -4 4.3 0.74
 12 2 -4 5.19 0.84
 -12 -2 4 4.75 0.46
 -12 -2 4 3.14 0.66
 -12 -2 4 3.8 0.71
 -12 -2 4 4.37 0.75
 -12 -2 4 3.69 0.63
 -12 -2 4 3.46 0.74
 12 2 -5 2.69 0.82
 12 2 -5 2.31 0.82
 12 2 -5 3.03 0.73
 12 2 -5 3 0.8
 12 2 -5 2.44 0.78
 12 2 -5 3.83 0.95
 -12 -2 5 2.57 0.75
 -12 -2 5 2.54 0.76
 -12 -2 5 2.1 0.56
 -12 -2 5 1.67 0.6
 -12 -2 5 3.56 0.81
 12 2 -6 -0.2 0.63
 12 2 -6 -1.19 0.97
 12 2 -6 0.34 0.82
 12 2 -6 1.05 0.87
 12 2 -6 -0.88 0.91
 12 2 -6 1.02 0.76
 -12 -2 6 0.55 0.9
 -12 -2 6 -0.82 0.84
 -12 -2 6 -0.99 0.68
 -12 -2 6 0.87 0.84
 12 2 -7 7.02 1.37
 12 2 -7 6.86 1.31
 12 2 -7 7.47 1.22
 -12 -2 7 8.3 1.19
 -12 -2 7 8.07 1.23
 -12 -2 7 7.67 1.2
 -12 -2 7 4.35 1.29
 13 2 4 0.65 0.94
 13 2 4 2.33 0.82
 13 2 4 2.25 0.94
 13 2 4 1.71 0.45
 13 2 4 0.7 0.96
 -13 -2 -4 1.26 1.17
 -13 -2 -4 2.87 0.94
 -13 -2 -4 0.52 0.88
 -13 -2 -4 4.89 1.03
 -13 -2 -4 1.42 1.02
 13 2 3 13.17 1.39
 13 2 3 13.07 1.38
 13 2 3 11.1 1.11
 13 2 3 14.39 1.44
 13 2 3 11.84 0.6
 -13 -2 -3 15.27 1.44
 -13 -2 -3 13.92 1.38
 -13 -2 -3 13.35 1.1
 -13 -2 -3 12.59 1.35
 -13 -2 -3 12.29 1.23
 -13 -2 -3 11.7 1.8
 13 2 2 0.86 0.3
 13 2 2 0.88 0.27
 13 2 2 1.61 0.77
 13 2 2 1.5 0.59
 13 2 2 1.67 0.81
 13 2 2 1.47 0.76
 -13 -2 -2 2.25 0.8
 -13 -2 -2 1.34 0.62
 -13 -2 -2 1.16 0.75
 -13 -2 -2 0.25 0.78
 -13 -2 -2 0.85 0.74
 -13 -2 -2 2.12 0.77
 13 2 1 1.15 0.71
 13 2 1 1.24 0.64
 13 2 1 1.81 0.62
 13 2 1 0.54 0.32
 13 2 1 0.68 0.45
 13 2 1 -0.31 0.63
 13 2 1 0.46 0.29
 13 2 1 0.52 0.67
 -13 -2 -1 0.5 0.64
 -13 -2 -1 1.13 0.72
 -13 -2 -1 1.44 0.67
 -13 -2 -1 0.1 0.56
 -13 -2 -1 -0.08 0.66
 -13 -2 -1 0.19 0.7
 13 2 0 3.04 0.69
 13 2 0 3.91 0.75
 13 2 0 3.68 0.44
 13 2 0 5.3 0.84
 13 2 0 3.66 0.73
 -13 -2 0 4.77 0.69
 -13 -2 0 4.07 0.78
 -13 -2 0 3.98 0.72
 -13 -2 0 3.74 0.62
 -13 -2 0 3.17 0.7
 -13 -2 0 3.71 0.69
 13 2 -1 1.05 0.66
 13 2 -1 2.04 0.71
 13 2 -1 1.65 0.6
 13 2 -1 2 0.71
 13 2 -1 1.66 0.6
 13 2 -1 1.92 0.47
 -13 -2 1 1.41 0.56
 -13 -2 1 1.73 0.7
 -13 -2 1 1.84 0.7
 -13 -2 1 1.41 0.39
 -13 -2 1 1.8 0.67
 -13 -2 1 1.72 0.62
 -13 -2 1 1.66 0.68
 13 2 -2 1.29 0.61
 13 2 -2 -0.43 0.69
 13 2 -2 0.1 0.5
 13 2 -2 -0.08 0.57
 13 2 -2 -0.06 0.61
 13 2 -2 0.21 0.5
 -13 -2 2 0.25 0.5
 -13 -2 2 -0.18 0.7
 -13 -2 2 -0.45 0.62
 -13 -2 2 -0.19 0.58
 -13 -2 2 -1 0.54
 13 2 -3 6.72 0.94
 13 2 -3 7.24 0.92
 13 2 -3 6.44 0.84
 13 2 -3 6.91 0.83
 13 2 -3 7.35 0.8
 13 2 -3 9.05 0.99
 13 2 -3 7.06 0.76
 -13 -2 3 7.72 0.87
 -13 -2 3 7.82 0.87
 -13 -2 3 6.93 0.82
 -13 -2 3 8.09 0.93
 13 2 -4 1.03 0.71
 13 2 -4 -0.35 0.73
 13 2 -4 -0.38 0.72
 13 2 -4 0.95 0.73
 13 2 -4 1.45 0.73
 13 2 -4 0.08 0.78
 -13 -2 4 0.47 0.66
 -13 -2 4 0.65 0.78
 -13 -2 4 0.46 0.72
 -13 -2 4 -0.1 0.71
 -13 -2 4 -0.34 0.65
 13 2 -5 1.83 0.84
 13 2 -5 0.5 0.75
 13 2 -5 0.16 0.89
 13 2 -5 0.56 0.88
 13 2 -5 -1.13 0.73
 13 2 -5 0.48 0.82
 -13 -2 5 0.94 0.52
 -13 -2 5 1.29 0.81
 -13 -2 5 1.22 0.87
 -13 -2 5 0.76 0.83
 -13 -2 5 1.73 0.7
 13 2 -6 -0.46 0.95
 13 2 -6 -0.2 0.76
 13 2 -6 -1.18 1.14
 13 2 -6 0.57 0.97
 13 2 -6 -0.31 1.04
 -13 -2 6 -1.29 0.8
 -13 -2 6 -0.81 0.7
 -13 -2 6 -0.45 1.02
 -13 -2 6 -0.62 0.96
 -13 -2 6 0.05 0.9
 14 2 4 -0.27 1.17
 -14 -2 -4 -0.65 1.15
 14 2 3 1.18 0.89
 14 2 3 1.08 0.97
 14 2 3 1.94 0.8
 14 2 3 0.89 0.98
 -14 -2 -3 1.17 1.02
 -14 -2 -3 -0.96 0.98
 -14 -2 -3 -0.57 0.88
 -14 -2 -3 -0.83 0.85
 -14 -2 -3 1.65 0.83
 -14 -2 -3 -1.42 1.06
 14 2 2 0.28 0.88
 14 2 2 0.77 0.9
 14 2 2 0.59 0.84
 14 2 2 0.31 0.62
 14 2 2 0.74 0.63
 -14 -2 -2 -1.13 0.86
 -14 -2 -2 1.73 0.92
 -14 -2 -2 -0.08 0.66
 -14 -2 -2 -0.32 0.83
 -14 -2 -2 -1.28 0.79
 -14 -2 -2 -1 0.91
 14 2 1 0.95 0.74
 14 2 1 0.54 0.78
 14 2 1 0.09 0.27
 14 2 1 -0.37 0.69
 14 2 1 0.33 0.32
 14 2 1 1 0.63
 14 2 1 0.21 0.83
 14 2 1 -0.99 0.42
 -14 -2 -1 0.49 0.76
 -14 -2 -1 1.01 0.62
 -14 -2 -1 0.4 0.71
 -14 -2 -1 -0.58 0.73
 -14 -2 -1 0.21 0.82
 -14 -2 -1 1.34 0.77
 14 2 0 3.79 0.77
 14 2 0 2.6 0.74
 14 2 0 3.63 0.89
 14 2 0 4.1 0.89
 14 2 0 3.31 0.46
 -14 -2 0 4.29 0.75
 -14 -2 0 3.85 0.81
 -14 -2 0 3.44 0.85
 -14 -2 0 3.67 0.74
 -14 -2 0 4.26 0.85
 -14 -2 0 3.1 0.68
 14 2 -1 7.43 0.92
 14 2 -1 6.97 0.8
 14 2 -1 6 0.81
 14 2 -1 6.55 0.92
 14 2 -1 5.68 0.6
 14 2 -1 6.21 0.96
 -14 -2 1 6.38 0.78
 -14 -2 1 6.09 0.87
 -14 -2 1 7.35 0.82
 -14 -2 1 5.51 0.91
 -14 -2 1 6.5 0.94
 -14 -2 1 5.64 0.71
 -14 -2 1 7.37 0.9
 14 2 -2 1.26 0.75
 14 2 -2 1.46 0.61
 14 2 -2 1.67 0.64
 14 2 -2 0.78 0.78
 14 2 -2 3.48 0.83
 14 2 -2 1.59 0.72
 -14 -2 2 3.45 0.72
 -14 -2 2 2.72 0.81
 -14 -2 2 1.94 0.84
 -14 -2 2 1.89 0.78
 -14 -2 2 1.58 0.68
 14 2 -3 1.99 0.71
 14 2 -3 1.23 0.74
 14 2 -3 1.65 0.88
 14 2 -3 1.85 0.59
 14 2 -3 0.88 0.76
 14 2 -3 0.95 0.7
 -14 -2 3 2.12 0.9
 -14 -2 3 1.9 0.82
 -14 -2 3 0.93 0.79
 -14 -2 3 0.39 0.71
 14 2 -4 -0.43 0.74
 14 2 -4 0.42 0.82
 14 2 -4 -0.26 0.86
 14 2 -4 0.16 0.85
 14 2 -4 -1.4 0.75
 14 2 -4 -0.67 0.9
 -14 -2 4 0.33 0.93
 -14 -2 4 -0.54 0.7
 -14 -2 4 -0.62 0.79
 -14 -2 4 0.11 0.86
 -14 -2 4 0.17 0.84
 14 2 -5 3.71 0.87
 14 2 -5 6.96 1.13
 14 2 -5 7.4 1.11
 14 2 -5 7.19 1.09
 14 2 -5 8.1 1.22
 14 2 -5 5.76 1.25
 -14 -2 5 8.61 1.11
 -14 -2 5 5.52 0.93
 -14 -2 5 6.72 1.09
 -14 -2 5 5.75 1.07
 15 2 2 3.41 1.06
 15 2 2 2.06 0.99
 15 2 2 2.54 0.73
 15 2 2 2.8 1.13
 -15 -2 -2 5.09 1.15
 -15 -2 -2 2.75 1.16
 -15 -2 -2 3.02 1.15
 -15 -2 -2 3.14 1.07
 -15 -2 -2 2.23 1.11
 -15 -2 -2 1.06 0.85
 15 2 1 7.68 1.13
 15 2 1 6 1.09
 15 2 1 5.32 0.5
 15 2 1 5.02 1.08
 15 2 1 5.95 1.09
 15 2 1 5.82 0.85
 -15 -2 -1 5.43 0.93
 -15 -2 -1 5.72 1.09
 -15 -2 -1 5.35 1
 -15 -2 -1 5.88 1.07
 -15 -2 -1 6.14 1.08
 -15 -2 -1 6.39 1.08
 15 2 0 2.96 0.81
 15 2 0 4.88 1
 15 2 0 3.76 0.92
 15 2 0 4.02 0.49
 15 2 0 3.62 0.95
 -15 -2 0 4.47 0.75
 -15 -2 0 3.34 0.97
 -15 -2 0 3.99 0.97
 -15 -2 0 3.57 0.9
 -15 -2 0 4.23 0.77
 -15 -2 0 4.21 0.94
 15 2 -1 11.53 1.31
 15 2 -1 11.51 1.28
 15 2 -1 14.24 1.41
 15 2 -1 13.15 1.01
 15 2 -1 12.52 1.26
 15 2 -1 13.27 1.37
 -15 -2 1 10.33 1.22
 -15 -2 1 13.33 1.48
 -15 -2 1 13.88 1.43
 -15 -2 1 12.57 1.27
 -15 -2 1 12.59 1.41
 -15 -2 1 13.49 1.42
 15 2 -2 4.07 0.73
 15 2 -2 3 0.76
 15 2 -2 5.22 0.82
 15 2 -2 4.23 0.92
 15 2 -2 5.6 1.03
 -15 -2 2 4.49 0.99
 -15 -2 2 3.57 0.72
 -15 -2 2 4.72 1.02
 -15 -2 2 3.72 0.89
 -15 -2 2 4.61 0.8
 15 2 -3 5.43 1
 15 2 -3 5.45 1.17
 15 2 -3 5.91 0.76
 15 2 -3 4.49 0.94
 15 2 -3 3.82 0.9
 15 2 -3 5.25 1
 -15 -2 3 5.52 0.91
 -15 -2 3 7.49 1.1
 -15 -2 3 7.42 1.05
 -15 -2 3 7.54 1.05
 15 2 -4 -0.31 1.02
 15 2 -4 -0.62 1.02
 15 2 -4 0.77 0.97
 15 2 -4 1.41 1.01
 15 2 -4 0.41 0.8
 15 2 -4 -0.18 0.84
 -15 -2 4 -0.81 0.81
 -15 -2 4 1 1.13
 -15 -2 4 0.79 0.95
 -15 -2 4 0.48 1.03
 -15 -2 4 -0.53 0.91
 15 2 -5 1.74 1.13
 15 2 -5 2.81 1.28
 -15 -2 5 1.38 1.15
 -15 -2 5 1.49 1.14
 -15 -2 5 0.58 1.1
 16 2 1 4.94 1.19
 16 2 1 4.85 1.27
 16 2 1 6.82 1.3
 -16 -2 -1 6.62 1.3
 -16 -2 -1 3.06 1.19
 -16 -2 -1 4.94 1.15
 -16 -2 -1 5.73 1.27
 16 2 0 3.54 1.14
 16 2 0 4.01 1.2
 16 2 0 3.91 1.21
 -16 -2 0 3.5 1.15
 -16 -2 0 4.04 1.16
 -16 -2 0 3.34 1
 -16 -2 0 2.41 1.09
 -16 -2 0 3.35 1.16
 16 2 -1 0.84 0.69
 16 2 -1 2.86 1.08
 16 2 -1 2.76 1.02
 16 2 -1 1.65 1.07
 16 2 -1 0.44 0.93
 -16 -2 1 2.25 1.01
 -16 -2 1 2.1 0.81
 -16 -2 1 4.08 1.1
 -16 -2 1 1.51 0.8
 -16 -2 1 1.27 1.11
 16 2 -2 -0.15 1.07
 16 2 -2 -1.15 0.75
 16 2 -2 0.36 1.02
 16 2 -2 0.91 0.86
 16 2 -2 -0.27 1.12
 -16 -2 2 1.29 1.14
 -16 -2 2 1.53 1.07
 -16 -2 2 -1.78 0.96
 16 2 -3 0.57 0.95
 16 2 -3 -0.81 1.2
 16 2 -3 -0.25 0.8
 16 2 -3 1.31 1.05
 -16 -2 3 0.88 1.12
 -16 -2 3 0.53 1.12
 -16 -2 3 -0.63 1
 -16 3 3 0.51 1.13
 -16 3 3 0.15 1.07
 -16 3 3 2.07 1.11
 16 -3 -3 0.75 1.09
 16 -3 -3 0.73 1.22
 16 -3 -3 1.33 1.05
 -16 3 2 11.22 1.34
 -16 3 2 10.87 1.24
 -16 3 2 13.15 1.61
 -16 3 2 11.04 1.24
 -16 3 2 5.82 1.14
 16 -3 -2 10.85 1.35
 16 -3 -2 10.1 1.19
 16 -3 -2 9.06 0.94
 16 -3 -2 10.05 1.12
 -16 3 1 0.4 0.99
 -16 3 1 1.44 1.02
 -16 3 1 0.94 1.06
 -16 3 1 0.51 0.95
 -16 3 1 1.91 1.01
 16 -3 -1 1.89 1.1
 16 -3 -1 2.73 1.07
 16 -3 -1 -0.05 1.02
 16 -3 -1 0.95 0.88
 -16 3 0 1.02 1.04
 -16 3 0 -0.54 1.04
 -16 3 0 -0.3 1.02
 -16 3 0 0.64 0.88
 -16 3 0 0.97 1.11
 -16 3 0 0.54 0.97
 16 -3 0 -0.05 0.8
 16 -3 0 -0.62 1.05
 16 -3 0 1.31 1.02
 16 -3 0 1.38 1
 -16 3 -1 -0.33 1.07
 -16 3 -1 -0.29 1.2
 -16 3 -1 0.7 1.15
 -16 3 -1 -0.22 1.02
 16 -3 1 -0.75 1.09
 16 -3 1 -0.19 1.08
 -15 3 5 1.99 1.24
 -15 3 4 8.32 1.29
 -15 3 4 7.76 1.18
 -15 3 4 7.86 1.15
 -15 3 4 7.95 1.25
 15 -3 -4 8.44 1.21
 15 -3 -4 7.08 1.2
 15 -3 -4 9.33 1.21
 15 -3 -4 8.7 1.24
 -15 3 3 6.67 1.08
 -15 3 3 3.83 1.02
 -15 3 3 5.09 1.06
 -15 3 3 5.82 1.11
 15 -3 -3 6.71 1.11
 15 -3 -3 6.48 1.03
 15 -3 -3 6.04 1.12
 15 -3 -3 5.07 0.62
 -15 3 2 2.26 0.94
 -15 3 2 3.76 0.97
 -15 3 2 2.92 0.82
 -15 3 2 2.55 0.91
 -15 3 2 3.57 0.92
 15 -3 -2 3.97 0.97
 15 -3 -2 4.03 0.73
 15 -3 -2 3.53 1.1
 15 -3 -2 2.92 0.85
 -15 3 1 3.5 0.97
 -15 3 1 4.11 0.93
 -15 3 1 3.42 0.89
 -15 3 1 5.6 0.98
 -15 3 1 4.47 0.98
 15 -3 -1 3.33 1
 15 -3 -1 4.14 0.99
 15 -3 -1 3.3 0.94
 15 -3 -1 3.34 0.8
 -15 3 0 0.53 0.8
 -15 3 0 0.3 0.76
 -15 3 0 0.73 0.87
 -15 3 0 -0.72 0.82
 -15 3 0 0.31 0.84
 15 -3 0 -0.19 0.94
 15 -3 0 0.5 0.69
 15 -3 0 0.82 0.81
 15 -3 0 0.85 0.86
 -15 3 -1 2.71 0.92
 -15 3 -1 2.01 0.94
 -15 3 -1 0.99 0.91
 -15 3 -1 2.98 0.97
 -15 3 -1 2.36 0.98
 -15 3 -1 1.73 0.97
 15 -3 1 2.05 0.93
 15 -3 1 1.78 0.96
 15 -3 1 3.14 0.95
 15 -3 1 1.19 0.93
 -15 3 -2 2.01 1.15
 -15 3 -2 3.69 0.97
 -15 3 -2 1.19 0.98
 -15 3 -2 1.17 1.22
 -15 3 -2 1.52 0.99
 -15 3 -2 2.32 1
 15 -3 2 1.76 0.88
 15 -3 2 2.16 1.03
 15 -3 2 2.25 0.67
 15 -3 2 1.49 1.11
 15 -3 2 2.56 1.04
 -14 3 5 2.84 1.03
 -14 3 5 2.01 1.06
 -14 3 5 2.69 0.87
 -14 3 5 2.32 1.07
 14 -3 -5 1.74 0.95
 14 -3 -5 1.3 1.06
 14 -3 -5 4.73 1.11
 14 -3 -5 3.19 0.84
 14 -3 -5 2.31 1.07
 -14 3 4 -0.55 0.78
 -14 3 4 -0.58 0.87
 -14 3 4 0.45 0.9
 -14 3 4 -0.47 0.85
 14 -3 -4 -0.55 0.79
 14 -3 -4 1.1 0.76
 14 -3 -4 1.21 0.87
 14 -3 -4 0.14 0.89
 -14 3 3 5.38 0.88
 -14 3 3 6.34 0.96
 -14 3 3 7.22 1
 -14 3 3 7.79 1.03
 14 -3 -3 6.15 0.55
 14 -3 -3 7.04 0.99
 14 -3 -3 6.66 0.99
 14 -3 -3 6.11 1
 14 -3 -3 6.09 0.86
 -14 3 2 3.66 0.84
 -14 3 2 3.98 0.85
 -14 3 2 3.79 0.89
 -14 3 2 3.18 0.82
 14 -3 -2 3.74 0.86
 14 -3 -2 3.58 0.89
 14 -3 -2 3.43 0.74
 14 -3 -2 2.95 0.89
 -14 3 1 5.96 0.82
 -14 3 1 4.81 0.8
 -14 3 1 5.64 0.86
 -14 3 1 4.77 0.82
 -14 3 1 4.85 0.89
 14 -3 -1 5.69 0.77
 14 -3 -1 6.74 0.9
 14 -3 -1 5.87 0.85
 14 -3 -1 4.38 0.88
 -14 3 0 9.97 1.26
 -14 3 0 8.89 1.03
 -14 3 0 9.9 1.08
 -14 3 0 9.2 0.99
 -14 3 0 10.64 1.04
 14 -3 0 10.14 1.05
 14 -3 0 9.44 1.18
 14 -3 0 9.58 1
 14 -3 0 12.25 1.28
 -14 3 -1 6.57 0.98
 -14 3 -1 7.74 0.87
 -14 3 -1 7.88 0.87
 -14 3 -1 6.22 0.96
 -14 3 -1 7.28 1.05
 -14 3 -1 6.04 0.93
 14 -3 1 7.31 0.94
 14 -3 1 5.05 0.89
 14 -3 1 5.33 0.9
 14 -3 1 6.85 0.88
 -14 3 -2 19.02 1.32
 -14 3 -2 16.31 1.5
 -14 3 -2 18.88 1.4
 -14 3 -2 18.11 1.27
 -14 3 -2 20.71 1.94
 -14 3 -2 16.9 1.57
 14 -3 2 19.37 1.4
 14 -3 2 18.26 1.52
 14 -3 2 18.08 1.26
 14 -3 2 18.27 1.12
 14 -3 2 17.89 1.58
 -14 3 -3 3.44 1.14
 -14 3 -3 2.47 0.9
 -14 3 -3 1.14 1.21
 -14 3 -3 2.87 0.61
 -14 3 -3 1.64 0.89
 -14 3 -3 1.83 0.96
 -14 3 -3 2.24 0.84
 14 -3 3 2.11 0.67
 14 -3 3 0.98 1.04
 14 -3 3 2.57 1.03
 14 -3 3 2.09 0.82
 14 -3 3 3.45 0.81
 -13 3 6 1.99 0.86
 -13 3 6 0.64 1.01
 -13 3 6 -1.45 0.93
 -13 3 6 -0.4 1
 13 -3 -6 0.15 0.98
 13 -3 -6 0.13 0.77
 13 -3 -6 -1.01 1.06
 13 -3 -6 1.52 0.99
 -13 3 5 5.1 0.92
 -13 3 5 3.68 0.88
 -13 3 5 5.89 1.04
 -13 3 5 3.89 0.9
 13 -3 -5 3.87 1.01
 13 -3 -5 3.64 0.99
 13 -3 -5 3.85 0.89
 13 -3 -5 4.45 0.88
 -13 3 4 10.45 0.98
 -13 3 4 13.74 1.23
 -13 3 4 11.05 1.3
 -13 3 4 10.28 1.22
 13 -3 -4 11.82 1.25
 13 -3 -4 10.32 1.23
 13 -3 -4 9 0.97
 -13 3 3 0.56 0.67
 -13 3 3 1.33 0.67
 -13 3 3 1.01 0.69
 -13 3 3 0.49 0.64
 13 -3 -3 1.64 0.69
 13 -3 -3 0.65 0.67
 13 -3 -3 -0.55 0.66
 13 -3 -3 0.67 0.38
 13 -3 -3 0.6 0.75
 -13 3 2 17.42 1.22
 -13 3 2 17.16 1.24
 -13 3 2 13.75 1.15
 -13 3 2 14.82 1.16
 13 -3 -2 18.48 1.24
 13 -3 -2 14.07 1.27
 13 -3 -2 15.97 1.22
 13 -3 -2 16.39 1.15
 -13 3 1 9.04 1.04
 -13 3 1 9.22 1
 -13 3 1 11.03 1.07
 -13 3 1 8.62 1.02
 -13 3 1 8.14 0.99
 -13 3 1 9.55 0.94
 13 -3 -1 10.46 1.1
 13 -3 -1 8.34 0.96
 13 -3 -1 8.75 1.01
 13 -3 -1 10.36 1.15
 -13 3 0 13.63 1.1
 -13 3 0 10.32 1.05
 -13 3 0 13.54 1.08
 -13 3 0 12.95 1.16
 -13 3 0 12.62 1.1
 -13 3 0 12.65 1.19
 13 -3 0 10.78 1.08
 13 -3 0 12.52 1.09
 13 -3 0 14.47 1.14
 -13 3 -1 3.86 0.68
 -13 3 -1 2.84 0.67
 -13 3 -1 3.89 0.74
 -13 3 -1 3.94 0.75
 -13 3 -1 3.29 0.82
 -13 3 -1 2.66 0.81
 13 -3 1 4.79 0.74
 13 -3 1 3.11 0.71
 13 -3 1 3.23 0.31
 13 -3 1 2.73 0.69
 13 -3 1 3.76 0.76
 -13 3 -2 2.44 0.7
 -13 3 -2 3.46 0.83
 -13 3 -2 2.81 0.73
 -13 3 -2 3.04 0.84
 -13 3 -2 4.61 0.77
 -13 3 -2 2.89 0.92
 13 -3 2 4.8 0.8
 13 -3 2 3.59 0.59
 13 -3 2 3.39 0.75
 13 -3 2 4.36 0.75
 13 -3 2 3.68 0.75
 -13 3 -3 1.99 0.55
 -13 3 -3 2.6 0.74
 -13 3 -3 2.92 0.96
 -13 3 -3 2.46 0.8
 -13 3 -3 2.55 0.76
 -13 3 -3 2.47 0.76
 -13 3 -3 2.14 1.03
 13 -3 3 2.45 0.77
 13 -3 3 4.12 0.91
 13 -3 3 0.86 0.83
 13 -3 3 3.13 0.79
 13 -3 3 1.95 0.61
 -13 3 -4 0.85 1.03
 -13 3 -4 2.09 1.27
 -13 3 -4 1.09 0.93
 -13 3 -4 3.18 0.83
 -13 3 -4 3.74 0.8
 -13 3 -4 2.19 0.89
 13 -3 4 1.86 0.97
 13 -3 4 2.53 0.81
 13 -3 4 1.84 1
 13 -3 4 4.47 0.87
 13 -3 4 0.91 0.7
 -12 3 7 2.56 1.08
 -12 3 7 0.27 1.1
 -12 3 7 2.62 1.13
 12 -3 -7 3.92 1.18
 12 -3 -7 0.7 1.06
 -12 3 6 17.21 1.46
 -12 3 6 15.59 1.45
 -12 3 6 16.34 1.54
 12 -3 -6 16.15 1.45
 12 -3 -6 14.11 1.45
 12 -3 -6 14.57 1.31
 12 -3 -6 15.56 1.11
 -12 3 5 3.9 0.73
 -12 3 5 4.31 0.87
 -12 3 5 3.73 0.81
 -12 3 5 3.48 0.45
 -12 3 5 3.98 0.8
 12 -3 -5 3.5 0.82
 12 -3 -5 3.39 0.88
 12 -3 -5 4.26 0.85
 12 -3 -5 2.97 0.73
 -12 3 4 -0.44 0.59
 -12 3 4 -0.01 0.64
 -12 3 4 0.74 0.68
 12 -3 -4 -0.35 0.63
 12 -3 -4 0.43 0.69
 12 -3 -4 -0.14 0.66
 -12 3 3 1.91 0.65
 -12 3 3 3.36 0.67
 -12 3 3 4.37 0.74
 -12 3 3 2.66 0.65
 12 -3 -3 2.47 0.35
 12 -3 -3 1.81 0.63
 12 -3 -3 2.93 0.65
 12 -3 -3 2.45 0.63
 -12 3 2 7.7 0.9
 -12 3 2 8.31 0.97
 -12 3 2 7.62 0.79
 -12 3 2 8.74 0.97
 12 -3 -2 8.62 0.98
 12 -3 -2 7.94 0.96
 12 -3 -2 8.46 0.88
 12 -3 -2 7.43 0.73
 12 -3 -2 9.13 0.92
 -12 3 1 -0.54 0.52
 -12 3 1 -0.58 0.51
 -12 3 1 -0.5 0.49
 -12 3 1 -0.1 0.42
 -12 3 1 0.66 0.5
 12 -3 -1 0.34 0.52
 12 -3 -1 0.14 0.56
 12 -3 -1 -0.57 0.46
 12 -3 -1 -0.13 0.58
 -12 3 0 11.32 0.94
 -12 3 0 10.1 0.94
 -12 3 0 9.62 0.99
 -12 3 0 9.76 1.02
 -12 3 0 10.95 1
 -12 3 0 9.13 0.89
 12 -3 0 9.07 0.96
 12 -3 0 10.72 0.95
 12 -3 0 11.15 0.96
 -12 3 -1 0.36 0.61
 -12 3 -1 -1.1 0.52
 -12 3 -1 0.27 0.62
 -12 3 -1 0 0.51
 -12 3 -1 -0.56 0.51
 -12 3 -1 0.35 0.51
 12 -3 1 1.02 0.59
 12 -3 1 0.34 0.51
 12 -3 1 -0.21 0.57
 12 -3 1 1.03 0.5
 -12 3 -2 1.11 0.68
 -12 3 -2 1.21 0.76
 -12 3 -2 1.19 0.57
 -12 3 -2 1 0.58
 -12 3 -2 2.21 0.6
 -12 3 -2 0.67 0.68
 12 -3 2 0.83 0.6
 12 -3 2 1.33 0.49
 12 -3 2 0.65 0.63
 12 -3 2 0.44 0.57
 12 -3 2 2.12 0.63
 -12 3 -3 1.97 0.49
 -12 3 -3 1.68 0.83
 -12 3 -3 2.02 0.65
 -12 3 -3 2.4 0.74
 -12 3 -3 3.04 0.6
 -12 3 -3 2.21 0.68
 -12 3 -3 2.51 0.93
 12 -3 3 2.78 0.78
 12 -3 3 1.44 0.75
 12 -3 3 1.93 0.56
 12 -3 3 2.77 0.64
 12 -3 3 3.45 0.71
 -12 3 -4 13.51 1.09
 -12 3 -4 14.96 1.39
 -12 3 -4 13.82 1.05
 -12 3 -4 14.49 1.5
 -12 3 -4 9.88 1.33
 12 -3 4 13.01 1.09
 12 -3 4 15.44 1.11
 12 -3 4 12.46 1.36
 12 -3 4 13.16 1.21
 12 -3 4 10.61 1.11
 -12 3 -5 1.09 1.01
 -12 3 -5 -0.77 1.2
 -12 3 -5 0.89 1.07
 12 -3 5 1.56 1.02
 12 -3 5 -0.18 0.79
 12 -3 5 0.18 0.92
 -11 3 7 1.45 1.01
 -11 3 7 2.16 0.94
 -11 3 7 2.03 0.95
 11 -3 -7 1.57 0.47
 11 -3 -7 1.04 0.95
 11 -3 -7 5.11 1.01
 11 -3 -7 3.04 0.97
 11 -3 -7 1.75 0.58
 11 -3 -7 3.22 1.02
 -11 3 6 -0.26 0.74
 -11 3 6 1.83 0.84
 -11 3 6 1.1 0.74
 11 -3 -6 0.3 0.77
 11 -3 -6 1.05 0.81
 11 -3 -6 0.78 0.5
 11 -3 -6 0.95 0.75
 11 -3 -6 0.47 0.77
 -11 3 5 0.78 0.65
 -11 3 5 1.39 0.66
 -11 3 5 0.43 0.6
 11 -3 -5 -0.51 0.55
 11 -3 -5 0.53 0.64
 11 -3 -5 0.28 0.68
 11 -3 -5 -0.47 0.64
 -11 3 4 8.52 0.94
 -11 3 4 7 0.4
 -11 3 4 7.87 0.88
 -11 3 4 7.62 0.87
 11 -3 -4 7.74 0.94
 11 -3 -4 8.75 0.99
 11 -3 -4 8.5 1.07
 -11 3 3 37.47 1.31
 -11 3 3 38.96 1.39
 -11 3 3 36.58 1.25
 -11 3 3 38.21 1.37
 11 -3 -3 35.79 0.79
 11 -3 -3 38.78 1.34
 11 -3 -3 37.06 1.31
 11 -3 -3 36.12 1.35
 -11 3 2 3.28 0.59
 -11 3 2 3.07 0.58
 -11 3 2 4.33 0.65
 -11 3 2 3.36 0.57
 11 -3 -2 2.75 0.54
 11 -3 -2 2.81 0.57
 11 -3 -2 2.44 0.56
 11 -3 -2 1.89 0.6
 -11 3 1 2.88 0.57
 -11 3 1 2.21 0.53
 -11 3 1 2.39 0.45
 -11 3 1 3.05 0.6
 -11 3 1 2.81 0.54
 11 -3 -1 2.65 0.5
 11 -3 -1 2.37 0.58
 11 -3 -1 2.64 0.55
 11 -3 -1 3.31 0.61
 -11 3 0 11.16 0.81
 -11 3 0 11.1 0.93
 -11 3 0 10.51 0.92
 -11 3 0 9.6 0.86
 -11 3 0 10.5 0.92
 -11 3 0 11.58 0.9
 11 -3 0 10.4 0.9
 11 -3 0 11.27 0.92
 11 -3 0 9.42 0.82
 -11 3 -1 0.02 0.41
 -11 3 -1 0.36 0.55
 -11 3 -1 -0.7 0.48
 -11 3 -1 0.1 0.52
 -11 3 -1 0.7 0.46
 -11 3 -1 0.48 0.45
 11 -3 1 0.39 0.45
 11 -3 1 0.23 0.5
 11 -3 1 -0.41 0.41
 11 -3 1 0.03 0.5
 -11 3 -2 20.82 0.97
 -11 3 -2 22.53 1.07
 -11 3 -2 23.97 1.5
 -11 3 -2 20.24 1.16
 -11 3 -2 22.28 1.19
 -11 3 -2 24.13 1.16
 11 -3 2 23.57 1.13
 11 -3 2 22.54 1.18
 11 -3 2 21.15 1.12
 11 -3 2 21.37 0.95
 11 -3 2 22.68 0.98
 -11 3 -3 2.56 0.73
 -11 3 -3 2.69 0.59
 -11 3 -3 2.59 0.46
 -11 3 -3 3.32 0.58
 -11 3 -3 2.22 0.8
 -11 3 -3 2.35 0.61
 -11 3 -3 3.27 0.72
 11 -3 3 3.36 0.62
 11 -3 3 3.24 0.64
 11 -3 3 2.55 0.53
 11 -3 3 3.01 0.68
 11 -3 3 2.71 0.69
 -11 3 -4 2.43 0.73
 -11 3 -4 0.69 0.92
 -11 3 -4 1.11 0.58
 -11 3 -4 1.83 0.58
 -11 3 -4 1.67 0.78
 11 -3 4 0.92 0.69
 11 -3 4 1.18 0.62
 11 -3 4 0.5 0.57
 11 -3 4 2.33 0.63
 11 -3 4 2.13 0.77
 -11 3 -5 -0.54 1.03
 -11 3 -5 -0.14 0.91
 -11 3 -5 1.82 0.74
 -11 3 -5 0.22 0.85
 -11 3 -5 0.23 0.62
 11 -3 5 0.34 0.75
 11 -3 5 0 0.64
 11 -3 5 0.28 0.83
 11 -3 5 0.09 0.73
 11 -3 5 0.85 0.71
 -11 3 -6 1.49 1.11
 11 -3 6 3.46 1.22
 11 -3 6 2.89 0.95
 -10 3 8 0.89 1.04
 -10 3 8 0.8 1.33
 -10 3 8 3.18 1.19
 10 -3 -8 2.11 1.17
 10 -3 -8 3.65 1.19
 -10 3 7 4.23 0.91
 -10 3 7 3.75 0.93
 -10 3 7 4.31 0.95
 10 -3 -7 3.04 0.69
 10 -3 -7 3.81 0.83
 10 -3 -7 1.01 0.78
 10 -3 -7 4.4 0.95
 10 -3 -7 4.02 0.97
 -10 3 6 0.17 0.63
 -10 3 6 0.66 0.65
 -10 3 6 -0.64 0.63
 10 -3 -6 0.13 0.4
 10 -3 -6 1.09 0.73
 10 -3 -6 0.06 0.65
 10 -3 -6 -0.17 0.46
 10 -3 -6 -0.03 0.37
 10 -3 -6 0.26 0.59
 10 -3 -6 -0.57 0.62
 -10 3 5 0.44 0.52
 -10 3 5 0.04 0.54
 -10 3 5 0.33 0.59
 10 -3 -5 0.6 0.34
 10 -3 -5 0.41 0.59
 10 -3 -5 -0.48 0.45
 10 -3 -5 -0.15 0.58
 10 -3 -5 0.5 0.28
 10 -3 -5 0.83 0.61
 10 -3 -5 0.9 0.54
 -10 3 4 23.48 1.05
 -10 3 4 25.9 1.15
 -10 3 4 24.87 1.08
 10 -3 -4 23.81 1.12
 10 -3 -4 24.9 1.19
 10 -3 -4 23.95 0.67
 10 -3 -4 24.3 1.13
 -10 3 3 0.89 0.49
 -10 3 3 0.94 0.5
 -10 3 3 1.02 0.46
 -10 3 3 0.7 0.47
 10 -3 -3 -0.04 0.46
 10 -3 -3 0.91 0.23
 10 -3 -3 0.5 0.2
 10 -3 -3 0.82 0.49
 10 -3 -3 1.1 0.48
 -10 3 2 29.95 1.12
 -10 3 2 29.25 1.14
 -10 3 2 30.33 1.17
 -10 3 2 28.28 1
 10 -3 -2 30.09 0.94
 10 -3 -2 30.62 1.05
 10 -3 -2 29.47 1.17
 10 -3 -2 31.28 1.14
 10 -3 -2 29.01 1.1
 -10 3 1 0.37 0.42
 -10 3 1 0.26 0.42
 -10 3 1 -0.24 0.37
 -10 3 1 -0.15 0.38
 -10 3 1 0.04 0.33
 10 -3 -1 0.13 0.42
 10 -3 -1 -0.41 0.38
 10 -3 -1 0.35 0.42
 10 -3 -1 0.27 0.36
 -10 3 0 49.34 1.4
 -10 3 0 48.83 1.41
 -10 3 0 48.06 1.39
 -10 3 0 49 1.52
 -10 3 0 47.63 1.4
 -10 3 0 45.73 1.2
 10 -3 0 47.75 1.37
 10 -3 0 48.37 1.43
 10 -3 0 48.63 1.54
 10 -3 0 46.39 1.35
 -10 3 -1 1.35 0.5
 -10 3 -1 1.37 0.54
 -10 3 -1 1.13 0.42
 -10 3 -1 0.45 0.45
 -10 3 -1 1.92 0.53
 -10 3 -1 1.36 0.44
 10 -3 1 1.72 0.49
 10 -3 1 1.4 0.49
 10 -3 1 2.1 0.49
 10 -3 1 1.14 0.46
 -10 3 -2 2.42 0.68
 -10 3 -2 1.97 0.57
 -10 3 -2 2.64 0.52
 -10 3 -2 1.78 0.54
 -10 3 -2 1.93 0.56
 -10 3 -2 2.43 0.48
 10 -3 2 2.8 0.55
 10 -3 2 2.47 0.57
 10 -3 2 2.12 0.44
 10 -3 2 2.13 0.48
 10 -3 2 2.82 0.54
 -10 3 -3 0.22 0.63
 -10 3 -3 -0.18 0.56
 -10 3 -3 0.12 0.48
 -10 3 -3 -0.61 0.45
 -10 3 -3 0.3 0.48
 -10 3 -3 0.34 0.35
 10 -3 3 -0.4 0.46
 10 -3 3 0 0.42
 10 -3 3 0.12 0.53
 10 -3 3 -0.23 0.49
 -10 3 -4 7.04 0.84
 -10 3 -4 6.57 0.79
 -10 3 -4 5.02 0.77
 -10 3 -4 4.61 0.96
 -10 3 -4 6.94 0.77
 10 -3 4 6.5 0.67
 10 -3 4 5.46 0.72
 10 -3 4 8.01 0.85
 10 -3 4 5.51 0.77
 10 -3 4 5.75 0.73
 -10 3 -5 4.26 0.73
 -10 3 -5 4.45 0.9
 -10 3 -5 3.49 0.64
 -10 3 -5 2.46 0.92
 10 -3 5 2.09 0.7
 10 -3 5 2.15 0.78
 10 -3 5 4.03 0.7
 10 -3 5 3.79 0.7
 10 -3 5 3.32 0.69
 -10 3 -6 5.13 1.01
 -10 3 -6 4.12 1.06
 -10 3 -6 6.43 0.87
 10 -3 6 5.68 1.11
 10 -3 6 6.07 0.86
 10 -3 6 5.04 1.06
 10 -3 6 7.52 0.79
 10 -3 6 5.56 0.98
 -9 3 8 -1.11 1.03
 -9 3 8 0.84 1.14
 -9 3 8 1.48 1
 9 -3 -8 0.26 0.97
 9 -3 -8 -0.87 0.92
 9 -3 -8 1.18 1.04
 -9 3 7 2.38 0.73
 -9 3 7 3.28 0.87
 -9 3 7 3.62 0.85
 9 -3 -7 2.05 0.72
 9 -3 -7 1.19 0.74
 9 -3 -7 0.98 0.77
 9 -3 -7 2.81 0.9
 9 -3 -7 1.99 0.71
 -9 3 6 14.64 1.08
 -9 3 6 12.42 1.1
 -9 3 6 13.04 1
 9 -3 -6 15.4 1.14
 9 -3 -6 15.67 1.11
 9 -3 -6 15.85 1.12
 9 -3 -6 14.78 1.12
 9 -3 -6 15.32 1.13
 -9 3 5 2.8 0.59
 -9 3 5 2.23 0.57
 -9 3 5 1.81 0.55
 9 -3 -5 2.98 0.63
 9 -3 -5 3.04 0.6
 9 -3 -5 2.22 0.42
 9 -3 -5 2.71 0.6
 9 -3 -5 2.16 0.37
 9 -3 -5 2.2 0.61
 -9 3 4 14.69 0.91
 -9 3 4 14.96 0.84
 -9 3 4 12.26 0.87
 9 -3 -4 15.05 0.63
 9 -3 -4 14.07 0.91
 9 -3 -4 15.78 0.92
 9 -3 -4 14.29 0.96
 -9 3 3 15.05 0.84
 -9 3 3 14.35 0.78
 -9 3 3 14.94 0.85
 9 -3 -3 15.53 0.83
 9 -3 -3 15.01 0.84
 9 -3 -3 13.66 0.87
 9 -3 -3 14.78 0.58
 -9 3 2 4.39 0.54
 -9 3 2 5.29 0.65
 -9 3 2 5.35 0.61
 -9 3 2 5.43 0.58
 9 -3 -2 5.16 0.59
 9 -3 -2 5.57 0.66
 9 -3 -2 5.03 0.5
 9 -3 -2 5.24 0.61
 9 -3 -2 5.36 0.57
 -9 3 1 0.38 0.37
 -9 3 1 0.95 0.41
 -9 3 1 0.45 0.38
 -9 3 1 0.53 0.31
 -9 3 1 0.37 0.4
 9 -3 -1 0.37 0.32
 9 -3 -1 0.26 0.36
 9 -3 -1 0.69 0.39
 9 -3 -1 0.36 0.39
 -9 3 0 0.86 0.37
 -9 3 0 0.17 0.33
 -9 3 0 0.2 0.35
 -9 3 0 -0.05 0.35
 -9 3 0 -0.11 0.34
 -9 3 0 -0.26 0.36
 9 -3 0 -0.12 0.36
 9 -3 0 -0.24 0.35
 9 -3 0 -0.05 0.35
 9 -3 0 0.17 0.4
 9 -3 0 0.1 0.37
 -9 3 -1 16.16 0.71
 -9 3 -1 17.13 0.89
 -9 3 -1 17.31 1.04
 -9 3 -1 16.66 0.85
 -9 3 -1 16.55 0.83
 -9 3 -1 16.43 0.86
 9 -3 1 16.3 1.05
 9 -3 1 17.65 0.92
 9 -3 1 15.85 0.82
 9 -3 1 16.69 0.77
 9 -3 1 16.8 0.83
 -9 3 -2 0.15 0.39
 -9 3 -2 0.46 0.39
 -9 3 -2 0.81 0.42
 -9 3 -2 0.16 0.49
 -9 3 -2 0.21 0.46
 -9 3 -2 1.17 0.4
 9 -3 2 1.04 0.46
 9 -3 2 0.46 0.39
 9 -3 2 0.51 0.37
 9 -3 2 0.31 0.39
 9 -3 2 0.12 0.36
 -9 3 -3 0.63 0.46
 -9 3 -3 1.13 0.47
 -9 3 -3 0.71 0.32
 -9 3 -3 0.42 0.5
 -9 3 -3 -0.13 0.56
 -9 3 -3 0.42 0.44
 9 -3 3 1.11 0.54
 9 -3 3 0.57 0.42
 9 -3 3 0.36 0.43
 9 -3 3 0.38 0.38
 -9 3 -4 27.63 1.59
 -9 3 -4 29.19 1.2
 -9 3 -4 27.17 1.14
 -9 3 -4 29.43 1.25
 -9 3 -4 29.02 1.22
 9 -3 4 26.92 1.11
 9 -3 4 25.3 1.23
 9 -3 4 28.19 1.18
 9 -3 4 26.35 1.12
 9 -3 4 27.8 1.19
 -9 3 -5 6.31 0.83
 -9 3 -5 5.25 0.89
 -9 3 -5 7.59 0.92
 -9 3 -5 9.55 0.99
 9 -3 5 9.02 0.97
 9 -3 5 5.66 0.8
 9 -3 5 7.48 0.79
 9 -3 5 7.85 0.88
 9 -3 5 8.14 0.91
 9 -3 5 7.15 0.87
 -9 3 -6 1.01 0.88
 -9 3 -6 0.57 0.6
 -9 3 -6 0.96 0.68
 -9 3 -6 1.38 0.82
 9 -3 6 1.6 0.55
 9 -3 6 0.69 0.83
 9 -3 6 2.94 0.67
 9 -3 6 -0.05 0.65
 9 -3 6 0.93 0.77
 9 -3 6 1.12 0.83
 -9 3 -7 -0.12 1.03
 -9 3 -7 0.39 1.11
 9 -3 7 0.46 1.11
 9 -3 7 -0.64 0.97
 -8 3 8 1.33 0.95
 -8 3 8 2.73 1.08
 8 -3 -8 1.65 0.97
 8 -3 -8 1.51 0.7
 8 -3 -8 1.08 0.95
 8 -3 -8 1.87 0.96
 -8 3 7 4.92 0.83
 -8 3 7 5.96 0.93
 8 -3 -7 5.5 0.87
 8 -3 -7 5 0.72
 8 -3 -7 5.72 0.86
 8 -3 -7 7.7 0.9
 -8 3 6 0.9 0.55
 -8 3 6 1.1 0.59
 8 -3 -6 1.75 0.6
 8 -3 -6 2.07 0.65
 8 -3 -6 1.32 0.57
 8 -3 -6 2.43 0.64
 -8 3 5 2.99 0.52
 -8 3 5 1.96 0.53
 -8 3 5 3.45 0.59
 8 -3 -5 2.97 0.59
 8 -3 -5 2.79 0.57
 8 -3 -5 2.32 0.34
 8 -3 -5 3.33 0.61
 -8 3 4 1.08 0.41
 -8 3 4 1.03 0.4
 -8 3 4 0.79 0.4
 8 -3 -4 0.78 0.29
 8 -3 -4 0.96 0.45
 8 -3 -4 1.39 0.44
 8 -3 -4 0.7 0.44
 8 -3 -4 0.85 0.42
 -8 3 3 28.8 0.92
 -8 3 3 30.68 1.03
 -8 3 3 30.57 1
 8 -3 -3 29.62 1
 8 -3 -3 30.71 1.01
 8 -3 -3 29.15 0.84
 8 -3 -3 29.39 1.01
 -8 3 2 22.63 0.91
 -8 3 2 22.54 0.88
 -8 3 2 22.91 0.88
 -8 3 2 23.11 0.78
 8 -3 -2 23.27 0.75
 8 -3 -2 24.48 0.83
 8 -3 -2 24.21 0.91
 8 -3 -2 23.44 0.88
 -8 3 1 15.73 0.77
 -8 3 1 16.08 0.72
 -8 3 1 15.57 0.68
 -8 3 1 15.65 0.78
 -8 3 1 14.94 0.73
 8 -3 -1 15.63 0.68
 8 -3 -1 15.83 0.73
 8 -3 -1 15.61 0.79
 8 -3 -1 14.76 0.76
 -8 3 0 25.29 0.92
 -8 3 0 24.34 0.75
 -8 3 0 23.05 0.94
 -8 3 0 23.9 0.91
 -8 3 0 23.86 0.89
 8 -3 0 23.63 0.84
 8 -3 0 23.16 0.98
 8 -3 0 23.68 0.9
 8 -3 0 22.03 0.84
 8 -3 0 23.42 0.92
 -8 3 -1 27.05 0.97
 -8 3 -1 27.04 1.03
 -8 3 -1 29.76 1.18
 -8 3 -1 28.71 1.01
 -8 3 -1 27.13 0.8
 -8 3 -1 29.66 1
 8 -3 1 28.06 1
 8 -3 1 28.02 1.02
 8 -3 1 27.98 1.17
 8 -3 1 26.74 0.86
 8 -3 1 27.85 0.96
 -8 3 -2 40.24 1.25
 -8 3 -2 39.98 1.2
 -8 3 -2 40.43 1.19
 -8 3 -2 40.26 1.24
 -8 3 -2 40.72 1.5
 8 -3 2 40.83 1.08
 8 -3 2 39.86 1.01
 8 -3 2 39.57 1.17
 8 -3 2 40.78 1.28
 8 -3 2 40.08 1.22
 -8 3 -3 17.16 1.2
 -8 3 -3 15.56 0.86
 -8 3 -3 16.12 0.92
 -8 3 -3 16.76 0.92
 -8 3 -3 16.82 0.66
 -8 3 -3 17.14 0.9
 8 -3 3 16.99 0.93
 8 -3 3 16.7 0.87
 8 -3 3 15.89 0.8
 8 -3 3 16.43 0.91
 -8 3 -4 0.95 0.51
 -8 3 -4 0 0.5
 -8 3 -4 1.43 0.46
 -8 3 -4 0.57 0.6
 -8 3 -4 1.12 0.48
 8 -3 4 0.34 0.49
 8 -3 4 0.64 0.49
 8 -3 4 1.79 0.49
 8 -3 4 1.11 0.47
 8 -3 4 1.02 0.44
 8 -3 4 0.5 0.45
 -8 3 -5 4.22 0.77
 -8 3 -5 7.4 0.86
 -8 3 -5 5.22 0.72
 -8 3 -5 4.89 0.61
 8 -3 5 7.32 0.87
 8 -3 5 6.42 0.73
 8 -3 5 6.25 0.76
 8 -3 5 5.81 0.72
 8 -3 5 7.99 0.89
 8 -3 5 5.54 0.69
 -8 3 -6 4.78 0.73
 -8 3 -6 2.06 0.85
 -8 3 -6 4.74 0.84
 -8 3 -6 5.02 0.72
 8 -3 6 4.94 0.71
 8 -3 6 4.83 0.85
 8 -3 6 5.14 0.7
 8 -3 6 4.03 0.8
 8 -3 6 5.17 0.89
 -8 3 -7 -0.49 0.94
 -8 3 -7 1.42 0.98
 -8 3 -7 0.65 0.78
 8 -3 7 1.1 0.67
 8 -3 7 2.73 0.96
 8 -3 7 -0.23 0.89
 8 -3 7 0.64 0.97
 -7 3 8 -1.24 0.74
 -7 3 8 0.09 0.87
 -7 3 8 0.19 0.87
 7 -3 -8 0.45 0.63
 7 -3 -8 0.14 0.83
 7 -3 -8 -0.54 0.79
 7 -3 -8 -0.57 0.92
 7 -3 -8 1.28 0.86
 -7 3 7 1.51 0.76
 -7 3 7 2.22 0.7
 7 -3 -7 2.29 0.62
 7 -3 -7 0.99 0.66
 7 -3 -7 1.64 0.73
 7 -3 -7 2.04 0.78
 -7 3 6 1.97 0.56
 -7 3 6 2.99 0.55
 7 -3 -6 2.23 0.64
 7 -3 -6 3.34 0.63
 7 -3 -6 2.44 0.54
 7 -3 -6 2.12 0.56
 -7 3 5 12.19 0.72
 -7 3 5 11.13 0.82
 7 -3 -5 12.3 0.45
 7 -3 -5 13.86 0.85
 7 -3 -5 13.64 0.94
 7 -3 -5 11.81 0.83
 -7 3 4 16.11 0.77
 -7 3 4 16.49 0.72
 -7 3 4 16.88 0.81
 7 -3 -4 16.58 0.84
 7 -3 -4 16.29 0.84
 7 -3 -4 17.43 0.79
 -7 3 3 14.29 0.73
 -7 3 3 13.64 0.68
 7 -3 -3 14.72 0.67
 7 -3 -3 14.49 0.77
 7 -3 -3 13.61 0.7
 7 -3 -3 13.23 0.59
 7 -3 -3 13.33 0.73
 -7 3 2 85.99 1.78
 -7 3 2 84.91 1.76
 -7 3 2 83.27 1.6
 7 -3 -2 86.32 1.7
 7 -3 -2 82.38 1.74
 7 -3 -2 84.69 1.82
 7 -3 -2 85.9 1.76
 -7 3 1 12.03 0.61
 -7 3 1 12.12 0.64
 -7 3 1 10.98 0.57
 -7 3 1 11.54 0.66
 -7 3 1 11.24 0.67
 7 -3 -1 12.03 0.57
 7 -3 -1 12 0.6
 7 -3 -1 12.32 0.68
 7 -3 -1 11.84 0.65
 -7 3 0 59.29 1.54
 -7 3 0 58 1.38
 -7 3 0 56.86 1.38
 -7 3 0 60.06 1.36
 -7 3 0 56.92 1.19
 7 -3 0 58.95 1.33
 7 -3 0 56.99 1.38
 7 -3 0 61.05 1.55
 7 -3 0 59.19 1.38
 -7 3 -1 59.57 1.37
 -7 3 -1 57.15 1.39
 -7 3 -1 56.12 1.18
 -7 3 -1 57.89 1.43
 -7 3 -1 57.42 1.65
 -7 3 -1 55.06 1.33
 7 -3 1 59.05 1.65
 7 -3 1 59.28 1.44
 7 -3 1 57.09 1.25
 7 -3 1 57.25 1.34
 7 -3 1 56.03 1.41
 -7 3 -2 1.88 0.47
 -7 3 -2 1.96 0.42
 -7 3 -2 1.67 0.35
 -7 3 -2 2.07 0.43
 -7 3 -2 2.64 0.46
 7 -3 2 1.9 0.34
 7 -3 2 2.58 0.42
 7 -3 2 2.27 0.42
 7 -3 2 2.19 0.31
 7 -3 2 1.91 0.48
 7 -3 2 2.29 0.46
 -7 3 -3 28.92 1.04
 -7 3 -3 29.35 1.07
 -7 3 -3 27.07 1.27
 -7 3 -3 26.39 0.96
 -7 3 -3 27.61 0.78
 -7 3 -3 27.2 0.97
 7 -3 3 28.54 1
 7 -3 3 28.48 0.93
 7 -3 3 28.8 1.04
 7 -3 3 28.96 1.05
 7 -3 3 27.89 0.97
 -7 3 -4 -0.29 0.42
 -7 3 -4 0.36 0.44
 -7 3 -4 -0.58 0.46
 -7 3 -4 0.55 0.43
 -7 3 -4 0.35 0.4
 7 -3 4 0.43 0.42
 7 -3 4 -0.12 0.36
 7 -3 4 0.46 0.44
 7 -3 4 0.88 0.46
 7 -3 4 -0.15 0.4
 7 -3 4 0.78 0.45
 -7 3 -5 5.09 0.65
 -7 3 -5 3.09 0.6
 -7 3 -5 4.83 0.66
 -7 3 -5 2.85 0.67
 7 -3 5 3.92 0.62
 7 -3 5 4 0.64
 7 -3 5 3.99 0.45
 7 -3 5 4.93 0.65
 7 -3 5 5.23 0.62
 7 -3 5 4.58 0.68
 -7 3 -6 -0.15 0.67
 -7 3 -6 0.85 0.55
 -7 3 -6 -0.31 0.66
 -7 3 -6 0.82 0.57
 7 -3 6 -0.22 0.61
 7 -3 6 -0.05 0.67
 7 -3 6 0.56 0.66
 7 -3 6 -0.25 0.54
 -7 3 -7 2.13 0.92
 -7 3 -7 1.06 0.86
 -7 3 -7 2.12 0.64
 -7 3 -7 3.03 0.75
 7 -3 7 2.82 0.88
 7 -3 7 2.86 0.91
 7 -3 7 2.75 0.88
 7 -3 7 2.93 0.69
 7 -3 7 2.34 0.65
 -6 3 9 4.63 1.16
 6 -3 -9 5.2 1.24
 -6 3 8 6.57 0.97
 -6 3 8 7 0.97
 -6 3 8 6.67 1.03
 6 -3 -8 7.78 0.99
 6 -3 -8 5.98 0.97
 6 -3 -8 4.3 1.06
 6 -3 -8 6.01 0.99
 6 -3 -8 3.85 0.78
 -6 3 7 3.8 0.74
 -6 3 7 3.29 0.67
 -6 3 7 2.89 0.59
 6 -3 -7 3.99 0.7
 6 -3 -7 3.57 0.66
 6 -3 -7 4.75 0.79
 6 -3 -7 3.58 0.86
 -6 3 6 1.28 0.46
 -6 3 6 1.75 0.59
 -6 3 6 1.36 0.49
 6 -3 -6 2.62 0.6
 6 -3 -6 1.6 0.65
 6 -3 -6 1.65 0.49
 6 -3 -6 1.76 0.49
 -6 3 5 5.31 0.61
 -6 3 5 5.62 0.62
 6 -3 -5 5.51 0.63
 6 -3 -5 5.22 0.62
 6 -3 -5 6.05 0.69
 -6 3 4 5.76 0.54
 -6 3 4 7.67 0.64
 6 -3 -4 7.07 0.65
 6 -3 -4 6.43 0.63
 6 -3 -4 6.61 0.59
 -6 3 3 30.05 0.95
 -6 3 3 30.42 0.97
 6 -3 -3 31.33 0.85
 6 -3 -3 31.56 1.01
 6 -3 -3 31.07 0.97
 -6 3 2 -0.05 0.31
 -6 3 2 0.15 0.31
 -6 3 2 0.13 0.25
 6 -3 -2 0.27 0.31
 6 -3 -2 0.35 0.33
 6 -3 -2 0.07 0.31
 6 -3 -2 0.08 0.2
 -6 3 1 86.3 1.66
 -6 3 1 83.46 1.69
 -6 3 1 84.17 1.71
 -6 3 1 81.47 1.53
 -6 3 1 86.09 1.87
 6 -3 -1 81.96 1.68
 6 -3 -1 85.75 1.86
 6 -3 -1 86.5 1.74
 6 -3 -1 86.13 1.57
 -6 3 0 4.26 0.51
 -6 3 0 4.99 0.41
 -6 3 0 4.55 0.55
 -6 3 0 4.89 0.56
 -6 3 0 4.54 0.51
 6 -3 0 4.33 0.48
 6 -3 0 4.32 0.51
 6 -3 0 4.7 0.51
 6 -3 0 4.71 0.57
 -6 3 -1 2.96 0.39
 -6 3 -1 2.54 0.29
 -6 3 -1 2.91 0.39
 -6 3 -1 2.12 0.4
 -6 3 -1 2.85 0.42
 -6 3 -1 2.51 0.4
 6 -3 1 2.5 0.45
 6 -3 1 2.51 0.32
 6 -3 1 2.85 0.39
 6 -3 1 2.16 0.4
 6 -3 1 2.07 0.4
 -6 3 -2 7.03 0.54
 -6 3 -2 5.83 0.58
 -6 3 -2 8.06 0.72
 -6 3 -2 6.82 0.56
 -6 3 -2 6.08 0.57
 6 -3 2 6.14 0.53
 6 -3 2 5.13 0.56
 6 -3 2 6.46 0.4
 6 -3 2 6.88 0.83
 6 -3 2 6.6 0.53
 6 -3 2 7.54 0.59
 -6 3 -3 14.39 0.75
 -6 3 -3 14.48 0.83
 -6 3 -3 15.5 0.73
 -6 3 -3 14.67 0.7
 -6 3 -3 14.57 1.02
 -6 3 -3 15.22 0.57
 6 -3 3 15.43 0.83
 6 -3 3 15.05 0.71
 6 -3 3 16.24 0.79
 6 -3 3 15.29 0.75
 6 -3 3 14.55 0.7
 -6 3 -4 1.92 0.46
 -6 3 -4 2.53 0.46
 -6 3 -4 2.11 0.53
 -6 3 -4 0.91 0.5
 6 -3 4 3.03 0.54
 6 -3 4 2.42 0.38
 6 -3 4 2.05 0.45
 6 -3 4 2.19 0.43
 6 -3 4 2.7 0.51
 6 -3 4 1.98 0.48
 -6 3 -5 2.14 0.53
 -6 3 -5 1.42 0.59
 -6 3 -5 3.07 0.55
 -6 3 -5 3.08 0.53
 6 -3 5 2.77 0.51
 6 -3 5 3.62 0.57
 6 -3 5 1.95 0.54
 6 -3 5 2.48 0.54
 6 -3 5 2.65 0.34
 6 -3 5 2.61 0.54
 -6 3 -6 6.51 0.76
 -6 3 -6 6 0.69
 -6 3 -6 8.32 1.11
 -6 3 -6 6.5 0.76
 -6 3 -6 4.44 0.83
 6 -3 6 6.05 0.72
 6 -3 6 6.73 0.8
 6 -3 6 6.24 0.71
 6 -3 6 6.9 0.78
 6 -3 6 9.8 1.1
 -6 3 -7 2.1 0.84
 -6 3 -7 5.14 0.88
 -6 3 -7 4.65 0.76
 -6 3 -7 6.56 0.83
 6 -3 7 3.96 0.66
 6 -3 7 4.29 0.68
 6 -3 7 5.42 0.86
 6 -3 7 4.92 0.9
 6 -3 7 5.53 0.96
 -6 3 -8 -1.6 0.94
 6 -3 8 -0.37 1.03
 6 -3 8 0.35 1.14
 -5 3 9 -1.04 0.95
 5 -3 -9 0.77 1.11
 5 -3 -9 -0.53 1.01
 5 -3 -9 -1.11 1.22
 -5 3 8 0.12 0.67
 -5 3 8 1.27 0.83
 -5 3 8 0.93 0.82
 -5 3 8 0.55 0.57
 5 -3 -8 -0.14 0.68
 5 -3 -8 0.37 0.69
 5 -3 -8 -0.38 0.54
 5 -3 -8 1.02 0.82
 5 -3 -8 0.46 0.95
 -5 3 7 0.57 0.59
 -5 3 7 -0.19 0.49
 -5 3 7 0.89 0.62
 -5 3 7 -0.04 0.53
 5 -3 -7 1.21 0.57
 5 -3 -7 0.12 0.65
 5 -3 -7 -0.06 0.57
 5 -3 -7 -0.25 0.72
 5 -3 -7 0.08 0.53
 -5 3 6 3.05 0.54
 -5 3 6 2.97 0.6
 -5 3 6 3.81 0.57
 5 -3 -6 2.03 0.55
 5 -3 -6 3.17 0.58
 5 -3 -6 2.66 0.56
 -5 3 5 0.22 0.38
 -5 3 5 0.24 0.35
 -5 3 5 0.58 0.36
 5 -3 -5 0.46 0.39
 5 -3 -5 0.32 0.4
 5 -3 -5 0.28 0.4
 -5 3 4 3.98 0.38
 -5 3 4 3.6 0.46
 5 -3 -4 4.5 0.54
 5 -3 -4 4.1 0.51
 5 -3 -4 3.54 0.47
 -5 3 3 17.06 0.72
 -5 3 3 15.74 0.58
 5 -3 -3 16.66 0.64
 5 -3 -3 17.11 0.72
 5 -3 -3 15.37 0.74
 -5 3 2 7.24 0.5
 -5 3 2 6.28 0.43
 -5 3 2 6.76 0.54
 5 -3 -2 6.58 0.52
 5 -3 -2 7.09 0.43
 5 -3 -2 6.7 0.45
 5 -3 -2 7.13 0.51
 -5 3 1 15.38 0.62
 -5 3 1 15.41 0.5
 -5 3 1 15.7 0.62
 -5 3 1 15.5 0.62
 5 -3 -1 15.18 0.6
 5 -3 -1 15.33 0.54
 5 -3 -1 15.66 0.67
 5 -3 -1 15.33 0.61
 -5 3 0 187.75 3.71
 -5 3 0 178.12 2.89
 -5 3 0 186.32 2.99
 -5 3 0 185.82 3.1
 -5 3 0 181.32 3.07
 5 -3 0 175.47 3.07
 5 -3 0 184.29 3.7
 5 -3 0 183.65 3.09
 5 -3 0 179.8 2.96
 -5 3 -1 2.82 0.34
 -5 3 -1 2.86 0.34
 -5 3 -1 3.2 0.43
 -5 3 -1 3.02 0.41
 -5 3 -1 3.53 0.42
 5 -3 1 3.71 0.45
 5 -3 1 3.08 0.43
 5 -3 1 2.99 0.34
 5 -3 1 2.98 0.4
 5 -3 1 2.9 0.36
 -5 3 -2 38.07 1.29
 -5 3 -2 39.04 0.98
 -5 3 -2 39.58 0.95
 -5 3 -2 38.61 1.05
 -5 3 -2 38.07 0.88
 -5 3 -2 37.85 1.05
 5 -3 2 36.66 1.04
 5 -3 2 39.66 1.31
 5 -3 2 37.34 1.04
 5 -3 2 36.16 0.93
 5 -3 2 36.59 0.96
 5 -3 2 38.56 0.96
 -5 3 -3 22.21 0.8
 -5 3 -3 23.22 0.67
 -5 3 -3 22.23 0.88
 -5 3 -3 22.32 0.87
 -5 3 -3 21.99 1.14
 -5 3 -3 22.63 0.76
 5 -3 3 22.23 0.79
 5 -3 3 23.49 0.87
 5 -3 3 22.67 0.86
 5 -3 3 22.48 0.78
 5 -3 3 23.08 0.81
 -5 3 -4 60.24 1.39
 -5 3 -4 59.71 1.95
 -5 3 -4 59.15 1.52
 -5 3 -4 63.18 1.6
 5 -3 4 60.96 1.22
 5 -3 4 61.26 1.53
 5 -3 4 61.23 1.42
 5 -3 4 61.82 1.48
 5 -3 4 61.84 1.47
 5 -3 4 60.82 1.54
 -5 3 -5 11.96 0.34
 -5 3 -5 12.09 0.84
 -5 3 -5 13.91 0.95
 -5 3 -5 11.45 1.11
 -5 3 -5 12.96 0.81
 -5 3 -5 11.69 0.83
 5 -3 5 11.94 0.9
 5 -3 5 12.81 0.84
 5 -3 5 11.01 0.77
 5 -3 5 15.95 0.91
 5 -3 5 12.51 0.79
 -5 3 -6 2.53 0.64
 -5 3 -6 2.3 0.61
 -5 3 -6 2.48 0.59
 -5 3 -6 3.5 0.6
 -5 3 -6 1.84 0.65
 5 -3 6 3.44 0.63
 5 -3 6 3.37 0.56
 5 -3 6 2.61 0.64
 5 -3 6 3.15 0.66
 5 -3 6 2.6 0.59
 -5 3 -7 10.29 0.98
 -5 3 -7 7.72 0.89
 -5 3 -7 7.7 0.95
 5 -3 7 8.2 0.92
 5 -3 7 8.09 0.88
 5 -3 7 6.87 0.87
 5 -3 7 10.98 1
 5 -3 7 9.5 1.11
 -5 3 -8 7.95 0.98
 -5 3 -8 5.11 1
 5 -3 8 3.66 0.97
 5 -3 8 4.71 1.11
 5 -3 8 3.79 1.09
 -4 3 9 -1.19 1.06
 4 -3 -9 -0.22 1.26
 4 -3 -9 1.81 0.9
 4 -3 -9 -0.96 0.99
 -4 3 8 -0.38 0.72
 -4 3 8 -0.38 0.71
 -4 3 8 1.3 0.76
 4 -3 -8 0.2 0.94
 4 -3 -8 -0.47 0.57
 4 -3 -8 0.61 0.69
 4 -3 -8 0.47 0.65
 4 -3 -8 0.9 0.71
 -4 3 7 0.85 0.57
 -4 3 7 -0.14 0.45
 -4 3 7 -0.03 0.56
 -4 3 7 -0.44 0.56
 4 -3 -7 0.6 0.49
 4 -3 -7 0.52 0.48
 4 -3 -7 -0.02 0.76
 4 -3 -7 0.07 0.5
 4 -3 -7 0.89 0.53
 -4 3 6 15.22 0.86
 -4 3 6 15.11 0.96
 -4 3 6 16.29 0.97
 4 -3 -6 13.19 0.95
 4 -3 -6 16.55 0.93
 4 -3 -6 15.25 0.79
 -4 3 5 5.41 0.57
 -4 3 5 5.58 0.67
 -4 3 5 5.49 0.68
 4 -3 -5 6.82 0.67
 4 -3 -5 5 0.58
 -4 3 4 3.86 0.48
 -4 3 4 3.75 0.44
 -4 3 4 4.5 0.51
 4 -3 -4 3.25 0.42
 4 -3 -4 4.38 0.44
 4 -3 -4 3.15 0.43
 -4 3 3 2.46 0.29
 -4 3 3 2.8 0.37
 4 -3 -3 2.67 0.4
 4 -3 -3 3.54 0.43
 4 -3 -3 2.96 0.4
 -4 3 2 56.37 1.22
 -4 3 2 53.1 1.19
 4 -3 -2 56.11 1.06
 4 -3 -2 55.17 1.2
 4 -3 -2 54.72 1.23
 -4 3 1 4.98 0.34
 -4 3 1 5.61 0.45
 -4 3 1 4.94 0.49
 4 -3 -1 5.81 0.45
 4 -3 -1 5.92 0.43
 4 -3 -1 5.64 0.46
 4 -3 -1 6.2 0.41
 -4 3 0 25.28 0.57
 -4 3 0 26.72 0.77
 -4 3 0 25.86 0.72
 -4 3 0 25.92 0.78
 -4 3 0 26.19 0.83
 4 -3 0 26.78 0.84
 4 -3 0 25.57 0.58
 4 -3 0 25.53 0.76
 4 -3 0 25.45 0.69
 4 -3 0 25.82 0.75
 -4 3 -1 15.06 0.56
 -4 3 -1 14.23 0.66
 -4 3 -1 14.77 0.62
 -4 3 -1 14.7 0.56
 -4 3 -1 14.01 0.77
 4 -3 1 14.87 0.77
 4 -3 1 14.17 0.55
 4 -3 1 14.12 0.65
 4 -3 1 14.08 0.44
 4 -3 1 13.55 0.65
 -4 3 -2 30.56 0.92
 -4 3 -2 29.09 0.87
 -4 3 -2 30.06 0.74
 -4 3 -2 30.27 1.14
 -4 3 -2 29.58 0.79
 -4 3 -2 29.77 0.75
 4 -3 2 29.74 0.76
 4 -3 2 30.27 1.16
 4 -3 2 30.12 0.81
 4 -3 2 29.55 0.88
 4 -3 2 30.04 0.82
 4 -3 2 30.46 0.91
 -4 3 -3 17.05 0.59
 -4 3 -3 17.17 0.78
 -4 3 -3 16.17 0.64
 -4 3 -3 16.64 0.76
 -4 3 -3 17.1 0.95
 4 -3 3 18.33 1.08
 4 -3 3 17.47 0.78
 4 -3 3 15.91 0.75
 4 -3 3 15.48 0.67
 4 -3 3 15.94 0.62
 4 -3 3 15.63 0.67
 -4 3 -4 4.5 0.64
 -4 3 -4 5.82 0.63
 -4 3 -4 5.51 0.61
 -4 3 -4 5.82 0.26
 -4 3 -4 6.02 0.56
 4 -3 4 6.46 0.63
 4 -3 4 5.12 0.61
 4 -3 4 5.29 0.34
 4 -3 4 5.57 0.6
 4 -3 4 5.6 0.6
 4 -3 4 5.05 0.56
 -4 3 -5 0.69 0.55
 -4 3 -5 0.95 0.44
 -4 3 -5 0.42 0.44
 -4 3 -5 0.51 0.42
 -4 3 -5 0.23 0.42
 -4 3 -5 0.52 0.4
 4 -3 5 0.93 0.42
 4 -3 5 0.85 0.39
 4 -3 5 -0.32 0.37
 4 -3 5 0.4 0.43
 4 -3 5 0.37 0.33
 4 -3 5 -0.27 0.38
 -4 3 -6 1.3 0.59
 -4 3 -6 1.08 0.54
 -4 3 -6 1.24 0.46
 -4 3 -6 0.02 0.56
 -4 3 -6 1.12 0.53
 4 -3 6 0.9 0.44
 4 -3 6 1.68 0.5
 4 -3 6 1.19 0.51
 4 -3 6 1.34 0.47
 4 -3 6 1.2 0.52
 4 -3 6 1.37 0.54
 -4 3 -7 2.49 0.61
 -4 3 -7 0.95 0.74
 -4 3 -7 2.18 0.61
 -4 3 -7 3.03 0.75
 -4 3 -7 2.67 0.7
 4 -3 7 2.57 0.57
 4 -3 7 1.27 0.71
 4 -3 7 1.92 0.61
 4 -3 7 0.84 0.63
 4 -3 7 2.88 0.74
 4 -3 7 2.4 0.59
 -4 3 -8 10 1.02
 -4 3 -8 13.36 1.23
 -4 3 -8 11.98 1.24
 -4 3 -8 11.09 0.6
 -4 3 -8 12.01 1.47
 4 -3 8 12.14 1.22
 4 -3 8 10 1.13
 4 -3 8 9.31 0.98
 4 -3 8 11.2 1.17
 4 -3 8 11.66 1.16
 -3 3 9 1.25 1.07
 3 -3 -9 -0.83 0.87
 3 -3 -9 -0.05 1.27
 3 -3 -9 0.87 0.92
 -3 3 8 4.56 0.89
 -3 3 8 6.07 0.82
 -3 3 8 4.06 0.74
 -3 3 8 4.6 0.85
 3 -3 -8 5.46 0.73
 3 -3 -8 4.21 1.11
 3 -3 -8 5.59 0.77
 3 -3 -8 7.03 0.89
 3 -3 -8 5.78 0.86
 3 -3 -8 6.66 0.64
 -3 3 7 0.34 0.55
 -3 3 7 0.62 0.54
 -3 3 7 0.59 0.53
 -3 3 7 -0.15 0.49
 3 -3 -7 0.42 0.52
 3 -3 -7 0.15 0.53
 3 -3 -7 0.21 0.77
 3 -3 -7 0.11 0.51
 3 -3 -7 0.73 0.52
 -3 3 6 8.36 0.81
 -3 3 6 8.05 0.85
 -3 3 6 8.75 0.8
 -3 3 6 8.63 0.78
 3 -3 -6 8.12 0.68
 3 -3 -6 7.38 0.76
 3 -3 -6 7.37 0.7
 3 -3 -6 10.04 0.82
 -3 3 5 0.23 0.39
 -3 3 5 0.88 0.39
 -3 3 5 0.15 0.34
 3 -3 -5 -0.29 0.29
 3 -3 -5 -0.17 0.34
 3 -3 -5 0.54 0.35
 -3 3 4 45.06 1.19
 -3 3 4 44.34 1.24
 3 -3 -4 44.84 1.22
 3 -3 -4 45.66 1.17
 3 -3 -4 45.81 0.97
 -3 3 3 1.24 0.23
 -3 3 3 1.44 0.34
 -3 3 3 0.83 0.33
 3 -3 -3 0.99 0.34
 3 -3 -3 1.54 0.36
 -3 3 2 13.33 0.42
 -3 3 2 13.74 0.56
 3 -3 -2 13.54 0.6
 3 -3 -2 12.82 0.59
 3 -3 -2 14.3 0.49
 -3 3 1 3.15 0.27
 -3 3 1 3.81 0.41
 -3 3 1 4.35 0.4
 3 -3 -1 4.05 0.4
 3 -3 -1 4.05 0.27
 3 -3 -1 4.08 0.42
 -3 3 0 16.96 0.53
 -3 3 0 16.68 0.66
 -3 3 0 16.63 0.6
 -3 3 0 16.88 0.61
 3 -3 0 16.98 0.39
 3 -3 0 16.88 0.61
 3 -3 0 17.81 0.66
 3 -3 0 17.06 0.59
 3 -3 0 17.41 0.51
 -3 3 -1 11.37 0.53
 -3 3 -1 11.17 0.54
 -3 3 -1 10.86 0.45
 -3 3 -1 11.05 0.44
 -3 3 -1 11.3 0.7
 3 -3 1 11.47 0.71
 3 -3 1 10.91 0.52
 3 -3 1 10.81 0.45
 3 -3 1 10.09 0.57
 -3 3 -2 11.98 0.46
 -3 3 -2 11.08 0.52
 -3 3 -2 12 0.58
 -3 3 -2 10.88 0.73
 -3 3 -2 11.62 0.46
 -3 3 -2 11.2 0.56
 3 -3 2 11.74 0.83
 3 -3 2 11.53 0.56
 3 -3 2 11.44 0.6
 3 -3 2 11.07 0.46
 3 -3 2 11.57 0.52
 3 -3 2 11.84 0.54
 -3 3 -3 2.47 0.49
 -3 3 -3 2.36 0.17
 -3 3 -3 2.29 0.35
 -3 3 -3 2.78 0.4
 -3 3 -3 2.32 0.3
 -3 3 -3 3.04 0.43
 3 -3 3 2.76 0.39
 3 -3 3 3.28 0.33
 3 -3 3 2.47 0.52
 3 -3 3 3.03 0.38
 3 -3 3 2.55 0.29
 3 -3 3 3.12 0.4
 3 -3 3 2.74 0.35
 -3 3 -4 8.01 0.64
 -3 3 -4 7.69 0.57
 -3 3 -4 8.44 0.68
 -3 3 -4 8.45 0.66
 -3 3 -4 7.54 0.59
 -3 3 -4 8.08 0.83
 3 -3 4 8.58 0.61
 3 -3 4 7.68 0.53
 3 -3 4 7.96 0.62
 3 -3 4 7.84 0.59
 3 -3 4 8.37 0.65
 3 -3 4 7.53 0.52
 -3 3 -5 4.19 0.51
 -3 3 -5 4.44 0.56
 -3 3 -5 3.99 0.52
 -3 3 -5 2.76 0.59
 -3 3 -5 5.36 0.6
 3 -3 5 3.62 0.49
 3 -3 5 4.32 0.49
 3 -3 5 4.51 0.53
 3 -3 5 3.57 0.43
 3 -3 5 5.84 0.63
 -3 3 -6 38.37 1.36
 -3 3 -6 37.04 1.76
 -3 3 -6 37.73 1.27
 -3 3 -6 37.19 1.3
 -3 3 -6 37.99 1.37
 3 -3 6 38.12 1.34
 3 -3 6 38.24 1.29
 3 -3 6 40.3 1.25
 3 -3 6 37.68 1.38
 3 -3 6 38.59 1.3
 3 -3 6 37.33 1.19
 -3 3 -7 1.49 0.61
 -3 3 -7 1.21 0.61
 -3 3 -7 -0.01 0.67
 -3 3 -7 -0.04 0.57
 -3 3 -7 -0.51 0.62
 3 -3 7 0.1 0.6
 3 -3 7 1.11 0.55
 3 -3 7 0.2 0.56
 3 -3 7 0.64 0.63
 3 -3 7 0.94 0.55
 -3 3 -8 -0.25 0.83
 -3 3 -8 2.06 0.82
 -3 3 -8 0.06 0.79
 -3 3 -8 -0.83 0.67
 -3 3 -8 -0.03 0.76
 3 -3 8 -0.37 0.71
 3 -3 8 0.01 0.72
 3 -3 8 -0.53 0.78
 3 -3 8 0.92 0.73
 3 -3 8 -0.05 0.82
 -2 3 9 1.4 0.86
 -2 3 9 2.26 1.11
 2 -3 -9 1.19 1.26
 2 -3 -9 3.49 0.93
 2 -3 -9 2.81 0.87
 -2 3 8 3.22 0.72
 -2 3 8 3.49 0.82
 -2 3 8 3.63 0.7
 2 -3 -8 3.36 0.72
 2 -3 -8 4.25 0.73
 2 -3 -8 4.27 0.78
 2 -3 -8 2.89 1.05
 2 -3 -8 3.61 0.7
 -2 3 7 1.52 0.51
 -2 3 7 0.76 0.48
 -2 3 7 1.84 0.58
 -2 3 7 1.41 0.61
 2 -3 -7 1.55 0.79
 2 -3 -7 0.73 0.49
 2 -3 -7 1.22 0.53
 2 -3 -7 1.3 0.59
 2 -3 -7 2.1 0.56
 -2 3 6 9.65 0.76
 -2 3 6 9.55 0.86
 -2 3 6 9.03 0.79
 -2 3 6 8.92 0.75
 2 -3 -6 9.49 1.23
 2 -3 -6 11.1 0.85
 2 -3 -6 9.53 0.79
 2 -3 -6 10.07 0.8
 2 -3 -6 9.41 0.68
 -2 3 5 8.11 0.62
 -2 3 5 8.75 0.65
 -2 3 5 7.92 0.74
 -2 3 5 8.31 0.7
 2 -3 -5 7.84 0.69
 2 -3 -5 8.75 0.75
 2 -3 -5 7.68 0.55
 2 -3 -5 7.87 0.65
 -2 3 4 31.3 0.99
 -2 3 4 33.27 1.04
 -2 3 4 30.9 0.96
 -2 3 4 32.01 0.91
 2 -3 -4 30.62 1.01
 2 -3 -4 32.22 0.77
 2 -3 -4 31.21 0.98
 -2 3 3 2.41 0.37
 -2 3 3 2.11 0.36
 2 -3 -3 1.61 0.34
 2 -3 -3 2.7 0.25
 2 -3 -3 1.81 0.35
 -2 3 2 1.33 0.18
 -2 3 2 0.86 0.29
 2 -3 -2 1 0.3
 2 -3 -2 0.88 0.3
 -2 3 1 82.77 1.45
 2 -3 -1 84.32 1.47
 2 -3 -1 82.4 1.26
 2 -3 -1 84.04 1.31
 -2 3 0 259.87 3.81
 -2 3 0 258.95 4.95
 -2 3 0 258.2 3.97
 -2 3 0 260.58 3.97
 2 -3 0 250.4 4.19
 2 -3 0 257.89 3.97
 2 -3 0 262.95 3.97
 2 -3 0 255.66 4.94
 2 -3 0 261.97 3.8
 2 -3 0 251.45 3.9
 -2 3 -1 0.1 0.25
 -2 3 -1 -0.53 0.29
 -2 3 -1 0.11 0.16
 -2 3 -1 -0.14 0.25
 -2 3 -1 0 0.19
 -2 3 -1 0.2 0.2
 2 -3 1 0.42 0.26
 2 -3 1 0.03 0.25
 2 -3 1 -0.06 0.15
 2 -3 1 0.32 0.31
 2 -3 1 0.3 0.18
 -2 3 -2 4.6 0.34
 -2 3 -2 4.31 0.4
 -2 3 -2 4.45 0.49
 -2 3 -2 4.4 0.61
 -2 3 -2 4.26 0.42
 -2 3 -2 3.9 0.42
 2 -3 2 4.11 0.32
 2 -3 2 4 0.43
 2 -3 2 4.5 0.41
 2 -3 2 4.51 0.49
 2 -3 2 4.49 0.39
 2 -3 2 4.57 0.41
 2 -3 2 6.15 0.74
 -2 3 -3 10.62 0.62
 -2 3 -3 9.51 0.77
 -2 3 -3 10.55 0.49
 -2 3 -3 10.45 0.58
 -2 3 -3 10.26 0.57
 -2 3 -3 10.61 0.61
 2 -3 3 10.25 0.56
 2 -3 3 10.67 0.47
 2 -3 3 10.33 0.59
 2 -3 3 10.76 0.57
 2 -3 3 10.79 0.61
 2 -3 3 11.98 0.83
 2 -3 3 10.5 0.51
 -2 3 -4 22.81 0.87
 -2 3 -4 20.82 0.84
 -2 3 -4 22.24 0.87
 -2 3 -4 21.41 0.84
 -2 3 -4 21.64 1.14
 2 -3 4 21.79 0.76
 2 -3 4 20.91 0.84
 2 -3 4 21.91 0.8
 2 -3 4 21.43 0.76
 2 -3 4 22.4 0.86
 2 -3 4 21.92 0.73
 -2 3 -5 2.31 0.45
 -2 3 -5 2.65 0.51
 -2 3 -5 2.24 0.47
 -2 3 -5 1.68 0.54
 -2 3 -5 2.32 0.46
 2 -3 5 3.71 0.51
 2 -3 5 3.14 0.48
 2 -3 5 2.73 0.46
 2 -3 5 1.88 0.42
 2 -3 5 2.39 0.42
 2 -3 5 2.55 0.43
 -2 3 -6 0.05 0.46
 -2 3 -6 -0.41 0.44
 -2 3 -6 0.24 0.46
 -2 3 -6 -0.26 0.53
 -2 3 -6 -0.06 0.44
 2 -3 6 0.1 0.47
 2 -3 6 0.12 0.48
 2 -3 6 -0.36 0.47
 2 -3 6 0.53 0.47
 2 -3 6 0.39 0.45
 -2 3 -7 1.95 0.64
 -2 3 -7 2.95 0.68
 -2 3 -7 1.17 0.68
 -2 3 -7 2.69 0.65
 -2 3 -7 2.43 0.59
 2 -3 7 1.22 0.64
 2 -3 7 2.33 0.68
 2 -3 7 2 0.62
 2 -3 7 2.46 0.64
 2 -3 7 2.2 0.58
 -2 3 -8 6.18 0.87
 -2 3 -8 5.11 0.93
 -2 3 -8 2.72 1.05
 -2 3 -8 5.44 0.83
 -2 3 -8 6.19 0.94
 2 -3 8 6.56 0.93
 2 -3 8 6.65 0.97
 2 -3 8 5.61 0.81
 2 -3 8 5.45 0.88
 2 -3 8 7.07 0.9
 -2 3 -9 2.69 1.1
 2 -3 9 -0.09 1.01
 2 -3 9 0.78 1.12
 -1 3 9 0.4 0.97
 -1 3 9 2.82 1.12
 1 -3 -9 1.38 1.24
 1 -3 -9 3.57 0.97
 -1 3 8 0.55 0.57
 -1 3 8 0.78 0.83
 -1 3 8 0.26 0.67
 1 -3 -8 -0.14 0.58
 1 -3 -8 -0.27 0.93
 1 -3 -8 -0.42 0.67
 1 -3 -8 0.7 0.65
 1 -3 -8 1.35 0.65
 -1 3 7 1.33 0.49
 -1 3 7 0.47 0.51
 -1 3 7 0.65 0.57
 1 -3 -7 0.26 0.49
 1 -3 -7 0.12 0.48
 1 -3 -7 0.97 0.76
 1 -3 -7 0.35 0.22
 1 -3 -7 0.74 0.53
 1 -3 -7 0.73 0.54
 -1 3 6 5.11 0.62
 -1 3 6 6.18 0.74
 -1 3 6 6.27 0.73
 1 -3 -6 7.21 0.67
 1 -3 -6 7.28 0.82
 1 -3 -6 5.5 0.78
 1 -3 -6 5.95 0.67
 1 -3 -6 6.1 0.67
 -1 3 5 17.65 0.83
 -1 3 5 15.77 0.69
 -1 3 5 15.57 0.78
 -1 3 5 16.51 0.81
 1 -3 -5 15.53 0.78
 1 -3 -5 16.56 0.83
 1 -3 -5 16.69 0.66
 1 -3 -5 16.5 0.87
 -1 3 4 63.83 1.37
 -1 3 4 63.03 1.45
 -1 3 4 64.7 1.49
 -1 3 4 64.59 1.44
 1 -3 -4 63.78 1.46
 1 -3 -4 62.09 1.45
 1 -3 -4 63.81 1.21
 1 -3 -4 64.21 1.48
 -1 3 3 54.59 1.14
 -1 3 3 53.93 1.21
 -1 3 3 52.74 1.22
 -1 3 3 55.42 1.22
 1 -3 -3 54.03 1.23
 1 -3 -3 54.82 0.99
 1 -3 -3 53.86 1.2
 -1 3 2 973.25 14.95
 -1 3 2 946.78 14.88
 1 -3 -2 962.75 15
 1 -3 -2 967.72 15.51
 1 -3 -2 1000 14.98
 1 -3 -2 998.03 14.03
 -1 3 1 331.71 4.87
 -1 3 1 343.48 5.08
 1 -3 -1 339.93 5.07
 1 -3 -1 324.23 4.92
 -1 3 0 71.38 1.52
 -1 3 0 73.6 1.28
 -1 3 0 70.93 1.21
 -1 3 0 73.56 1.21
 1 -3 0 71.68 1.2
 1 -3 0 75.99 1.54
 1 -3 0 73.39 1.2
 1 -3 0 72.18 1.29
 -1 3 -1 193.87 2.98
 -1 3 -1 192.24 2.86
 -1 3 -1 194.89 3.79
 -1 3 -1 195.99 3.15
 -1 3 -1 189.56 2.98
 1 -3 1 187.12 2.88
 1 -3 1 187.16 3.78
 1 -3 1 186.15 2.85
 1 -3 1 192.28 2.98
 1 -3 1 195.93 2.98
 1 -3 1 189.08 3.15
 1 -3 1 195.39 3.03
 1 -3 1 189.17 2.96
 -1 3 -2 5.07 0.49
 -1 3 -2 5.56 0.35
 -1 3 -2 5.58 0.47
 -1 3 -2 6.09 0.6
 -1 3 -2 5.41 0.42
 -1 3 -2 6.66 0.5
 1 -3 2 6.66 0.68
 1 -3 2 7 0.34
 1 -3 2 5.68 0.44
 1 -3 2 5.31 0.43
 1 -3 2 5.88 0.42
 1 -3 2 5.3 0.46
 -1 3 -3 27.24 0.87
 -1 3 -3 28.73 0.85
 -1 3 -3 28.17 1.11
 -1 3 -3 27.24 0.8
 -1 3 -3 29.11 0.87
 1 -3 3 27.53 0.71
 1 -3 3 26.96 0.79
 1 -3 3 26.55 0.8
 1 -3 3 27.87 0.83
 1 -3 3 27.91 0.8
 1 -3 3 27.41 1.06
 -1 3 -4 1.71 0.46
 -1 3 -4 3.33 0.43
 -1 3 -4 2.32 0.39
 -1 3 -4 2.52 0.41
 -1 3 -4 2.4 0.39
 1 -3 4 2.63 0.4
 1 -3 4 2.82 0.4
 1 -3 4 2.58 0.36
 1 -3 4 2.22 0.4
 1 -3 4 2.94 0.36
 -1 3 -5 10.93 0.76
 -1 3 -5 10.83 0.77
 -1 3 -5 10.3 0.71
 -1 3 -5 10.61 0.99
 -1 3 -5 11.43 0.69
 1 -3 5 10.39 0.68
 1 -3 5 10.25 0.66
 1 -3 5 10.72 0.72
 1 -3 5 11.58 0.69
 1 -3 5 11.43 0.76
 -1 3 -6 1.28 0.48
 -1 3 -6 0.76 0.52
 -1 3 -6 1.36 0.46
 -1 3 -6 1.55 0.49
 -1 3 -6 1.41 0.5
 -1 3 -6 0.99 0.48
 1 -3 6 1.77 0.51
 1 -3 6 1.84 0.51
 1 -3 6 1.68 0.47
 1 -3 6 1.38 0.48
 1 -3 6 2.45 0.53
 -1 3 -7 4.79 0.72
 -1 3 -7 3.72 0.68
 -1 3 -7 2.83 0.81
 -1 3 -7 4.7 0.67
 -1 3 -7 5.29 0.74
 1 -3 7 5.42 0.74
 1 -3 7 5 0.74
 1 -3 7 3.93 0.68
 1 -3 7 4.46 0.69
 1 -3 7 5.32 0.74
 -1 3 -8 1.26 0.71
 -1 3 -8 1.68 0.71
 -1 3 -8 -0.18 0.91
 -1 3 -8 2.64 0.8
 -1 3 -8 2.45 0.76
 1 -3 8 2.12 0.8
 1 -3 8 2.14 0.82
 1 -3 8 2.62 0.88
 1 -3 8 2.43 0.71
 1 -3 8 2.11 0.72
 -1 3 -9 0.52 1.06
 -1 3 -9 0.57 1.06
 1 -3 9 0.81 1.11
 1 -3 9 2.1 1.14
 0 3 9 -1.31 0.92
 0 3 9 -0.1 1.14
 0 -3 -9 2.15 1.05
 0 -3 -9 -0.34 0.88
 0 -3 -9 -0.97 1.24
 0 3 8 0.39 0.58
 0 3 8 0.99 0.78
 0 3 8 2.59 0.63
 0 3 8 0.73 0.71
 0 -3 -8 1.63 1.02
 0 -3 -8 0.64 0.68
 0 -3 -8 1.63 0.63
 0 -3 -8 1.56 0.69
 0 3 7 26.44 1.14
 0 3 7 27.68 1.31
 0 3 7 27.67 1.2
 0 3 7 25.41 1.27
 0 -3 -7 28.64 1.25
 0 -3 -7 28.08 1.14
 0 -3 -7 27.52 1.16
 0 -3 -7 27.54 1.18
 0 -3 -7 27.19 1.73
 0 3 6 6.46 0.68
 0 3 6 5.7 0.65
 0 3 6 5.15 0.42
 0 3 6 4.97 0.62
 0 -3 -6 4.19 0.57
 0 -3 -6 5 0.35
 0 -3 -6 5.91 0.81
 0 -3 -6 5.36 0.61
 0 -3 -6 4.8 0.61
 0 -3 -6 5.4 0.53
 0 3 5 18.24 0.83
 0 3 5 18.22 0.55
 0 3 5 18.46 0.8
 0 3 5 18.57 0.84
 0 -3 -5 20.03 0.89
 0 -3 -5 17.59 0.69
 0 -3 -5 18.1 0.83
 0 -3 -5 18.63 0.84
 0 3 4 79.19 1.68
 0 3 4 77.3 1.41
 0 3 4 75.66 1.65
 0 3 4 76.36 1.62
 0 -3 -4 76.59 1.66
 0 -3 -4 79.33 1.67
 0 -3 -4 78.89 1.69
 0 3 3 33.21 0.74
 0 3 3 33.27 0.7
 0 3 3 32.89 0.9
 0 3 3 30.89 0.89
 0 3 3 33.26 0.88
 0 -3 -3 33.56 0.91
 0 -3 -3 32.38 0.89
 0 -3 -3 32.28 0.92
 0 3 2 78.76 1.49
 0 3 2 82.25 1.41
 0 3 2 80.98 1.44
 0 3 2 81.18 1.49
 0 3 2 79.64 1.47
 0 -3 -2 80.61 1.48
 0 -3 -2 82.04 1.49
 0 3 1 4.7 0.29
 0 3 1 4.61 0.36
 0 3 1 4.32 0.33
 0 -3 -1 4.87 0.36
 0 -3 -1 4.83 0.31
 0 -3 -1 4.73 0.34
 0 -3 -1 4.68 0.3
 0 3 0 0.16 0.14
 0 -3 0 0.09 0.09
 0 -3 0 0.08 0.09
 0 -3 0 0.1 0.08
 0 3 -1 5.03 0.34
 0 3 -1 4.71 0.37
 0 3 -1 5.18 0.46
 0 3 -1 4.78 0.28
 0 3 -1 4.62 0.26
 0 3 -1 4.71 0.34
 0 3 -1 4.67 0.27
 0 -3 1 4.39 0.42
 0 -3 1 4.65 0.26
 0 -3 1 4.91 0.26
 0 -3 1 4.93 0.38
 0 -3 1 4.53 0.26
 0 -3 1 4.65 0.33
 0 -3 1 5.09 0.44
 0 3 -2 81.82 1.54
 0 3 -2 79.46 1.87
 0 3 -2 81.62 1.66
 0 3 -2 82.13 1.45
 0 3 -2 82.2 1.46
 0 -3 2 81.39 1.34
 0 -3 2 84.6 1.89
 0 -3 2 82.17 1.54
 0 -3 2 83.77 1.56
 0 -3 2 79.54 1.45
 0 -3 2 81.66 1.68
 0 -3 2 80.17 1.44
 0 3 -3 32.77 0.91
 0 3 -3 32.57 0.87
 0 3 -3 33.05 1.15
 0 3 -3 32.27 0.88
 0 3 -3 32.97 0.95
 0 -3 3 33.66 0.88
 0 -3 3 32.98 0.78
 0 -3 3 33.14 0.96
 0 -3 3 32.58 0.87
 0 -3 3 32.61 0.94
 0 -3 3 35.23 1.18
 0 3 -4 80.35 1.72
 0 3 -4 76.5 1.54
 0 3 -4 79.09 1.77
 0 3 -4 78.38 2.1
 0 3 -4 75.63 1.6
 0 3 -4 76.12 1.61
 0 -3 4 76.77 1.62
 0 -3 4 79.48 1.71
 0 -3 4 76.49 1.53
 0 3 -5 18.49 0.85
 0 3 -5 20.66 0.91
 0 3 -5 17.24 1.1
 0 3 -5 17.34 0.77
 0 3 -5 19.28 0.86
 0 3 -5 18.76 0.89
 0 -3 5 18.46 0.89
 0 -3 5 18.92 0.8
 0 -3 5 20.72 0.85
 0 3 -6 4.66 0.73
 0 3 -6 6.49 0.67
 0 3 -6 6.19 0.71
 0 3 -6 6.19 0.61
 0 3 -6 5.27 0.6
 0 -3 6 6.93 0.74
 0 -3 6 5.9 0.62
 0 -3 6 5.13 0.62
 0 -3 6 5.12 0.61
 0 3 -7 26.11 1.17
 0 3 -7 26.69 1.2
 0 3 -7 27.24 1.27
 0 3 -7 27.67 1.29
 0 3 -7 25.35 1.66
 0 -3 7 27.94 1.25
 0 -3 7 25.79 1.25
 0 -3 7 26.64 1.32
 0 -3 7 29.14 1.27
 0 3 -8 -0.44 0.9
 0 3 -8 0.93 0.69
 0 3 -8 0.92 0.76
 0 3 -8 1.38 0.72
 0 3 -8 0.83 0.73
 0 -3 8 1.48 0.65
 0 -3 8 1.43 0.8
 0 -3 8 2.42 0.83
 0 -3 8 1.74 0.73
 0 -3 8 1.92 0.87
 0 3 -9 -0.73 0.97
 0 3 -9 -1.66 0.91
 0 3 -9 -1.88 1.3
 0 3 -9 0.46 0.96
 0 -3 9 0.93 1.15
 0 -3 9 0.84 0.85
 0 -3 9 0.28 1.1
 0 -3 9 1.76 1.01
 1 3 9 -0.6 0.97
 1 3 9 1.01 1.03
 1 3 9 1.14 1.16
 -1 -3 -9 0.87 0.99
 -1 -3 -9 2.39 1.15
 1 3 8 3.42 0.63
 1 3 8 1.67 0.85
 1 3 8 1.24 0.62
 1 3 8 3.18 0.85
 1 3 8 1.98 0.38
 -1 -3 -8 3.03 0.76
 -1 -3 -8 2.8 0.83
 -1 -3 -8 2.81 0.69
 -1 -3 -8 0.83 0.92
 -1 -3 -8 2.43 0.61
 1 3 7 4.86 0.61
 1 3 7 4.4 0.62
 1 3 7 4.48 0.59
 1 3 7 4.04 0.72
 1 3 7 5.64 0.78
 -1 -3 -7 5.34 0.66
 -1 -3 -7 4.17 0.71
 -1 -3 -7 4.79 0.62
 -1 -3 -7 4.36 0.73
 -1 -3 -7 4.54 0.86
 1 3 6 1.25 0.33
 1 3 6 1.2 0.48
 1 3 6 1.78 0.54
 1 3 6 2.17 0.48
 1 3 6 1.68 0.46
 -1 -3 -6 1.68 0.53
 -1 -3 -6 2.23 0.52
 -1 -3 -6 1.55 0.48
 -1 -3 -6 1.38 0.58
 1 3 5 10.32 0.74
 1 3 5 11.35 0.7
 1 3 5 11.69 0.77
 1 3 5 9.97 0.54
 1 3 5 11.17 0.75
 -1 -3 -5 10.24 0.7
 -1 -3 -5 10.88 0.71
 -1 -3 -5 11.49 0.76
 -1 -3 -5 10.69 0.41
 1 3 4 2.49 0.43
 1 3 4 3.09 0.42
 1 3 4 2.39 0.37
 1 3 4 3.01 0.4
 1 3 4 2.31 0.39
 -1 -3 -4 2.68 0.44
 -1 -3 -4 3.16 0.46
 -1 -3 -4 2.42 0.38
 -1 -3 -4 2.67 0.25
 1 3 3 27.64 0.71
 1 3 3 28.13 0.85
 1 3 3 26.96 0.83
 1 3 3 29.04 0.82
 1 3 3 27.59 0.84
 -1 -3 -3 26.81 0.8
 -1 -3 -3 27.63 0.8
 -1 -3 -3 28.76 0.88
 -1 -3 -3 28.22 0.84
 -1 -3 -3 28.16 0.64
 1 3 2 6.28 0.43
 1 3 2 5.83 0.49
 1 3 2 5.47 0.45
 1 3 2 6.33 0.48
 1 3 2 6.18 0.4
 -1 -3 -2 5.98 0.42
 -1 -3 -2 5.51 0.49
 -1 -3 -2 7.16 0.49
 -1 -3 -2 5.73 0.22
 -1 -3 -2 5.68 0.45
 1 3 1 189.32 2.97
 1 3 1 183.68 2.99
 1 3 1 189.97 2.91
 1 3 1 196.09 3.14
 -1 -3 -1 194.89 2.97
 -1 -3 -1 192.06 3.14
 -1 -3 -1 187.52 2.99
 -1 -3 -1 191.68 2.94
 -1 -3 -1 190.26 2.96
 -1 -3 -1 193.3 2.91
 1 3 0 74.18 1.35
 1 3 0 71.78 1.21
 1 3 0 73.28 1.28
 1 3 0 73.08 1.19
 1 3 0 73.77 1.13
 1 3 0 72.84 1.19
 1 3 0 72.25 1.27
 1 3 0 72.66 1.3
 -1 -3 0 75.23 1.13
 -1 -3 0 74.94 1.18
 -1 -3 0 73 1.27
 -1 -3 0 75.07 1.29
 -1 -3 0 74 1.21
 -1 -3 0 75.97 1.2
 -1 -3 0 74.8 1.13
 -1 -3 0 72.98 1.31
 -1 -3 0 74.64 1.36
 -1 -3 0 72.49 1.34
 1 3 -1 337.12 5.22
 1 3 -1 335.04 4.82
 1 3 -1 347.74 5.77
 1 3 -1 323.81 5
 1 3 -1 334.84 6.3
 1 3 -1 332 4.98
 1 3 -1 332.08 5.1
 1 3 -1 327.24 5
 1 3 -1 342.77 5.1
 1 3 -1 337.74 5.28
 -1 -3 1 336.02 5.76
 -1 -3 1 343.2 4.83
 -1 -3 1 327.04 5.09
 -1 -3 1 340.01 4.99
 -1 -3 1 327.37 5.11
 -1 -3 1 330.78 5.23
 -1 -3 1 328.67 6.3
 -1 -3 1 330.31 5.09
 -1 -3 1 333.94 5.22
 1 3 -2 977.73 14.93
 1 3 -2 939.57 18.25
 1 3 -2 981.3 16.8
 1 3 -2 970.73 14.85
 1 3 -2 972.87 13.77
 1 3 -2 966.01 14.92
 1 3 -2 967.56 15.26
 -1 -3 2 949.52 18.31
 -1 -3 2 986.95 16.97
 -1 -3 2 952.26 14.76
 -1 -3 2 971.21 14.87
 1 3 -3 56.51 1.33
 1 3 -3 54.37 1.47
 1 3 -3 56.3 1.15
 1 3 -3 55 0.99
 1 3 -3 55.31 1.26
 1 3 -3 55.57 1.16
 1 3 -3 54.41 1.16
 -1 -3 3 54.59 1.16
 -1 -3 3 54.74 1.33
 -1 -3 3 53.92 1.23
 1 3 -4 64.18 1.41
 1 3 -4 62.8 1.1
 1 3 -4 63.35 1.39
 1 3 -4 62.61 1.47
 1 3 -4 65.43 1.36
 1 3 -4 63.99 1.55
 1 3 -4 62.33 1.78
 -1 -3 4 65.11 1.49
 -1 -3 4 64.14 1.34
 -1 -3 4 62.46 1.39
 -1 -3 4 63.31 1.55
 1 3 -5 15.52 1.05
 1 3 -5 17.23 0.8
 1 3 -5 15.13 0.74
 1 3 -5 18.6 0.83
 1 3 -5 16.6 0.79
 -1 -3 5 15.44 0.85
 -1 -3 5 16.15 0.78
 -1 -3 5 17.09 0.86
 -1 -3 5 15.97 0.74
 1 3 -6 7.86 0.79
 1 3 -6 4.38 0.7
 1 3 -6 5.78 0.63
 1 3 -6 6.87 0.76
 1 3 -6 6.27 0.72
 -1 -3 6 6.67 0.75
 -1 -3 6 6.47 0.68
 -1 -3 6 5.21 0.6
 1 3 -7 0.88 0.59
 1 3 -7 0.65 0.73
 1 3 -7 0.77 0.61
 1 3 -7 1.64 0.5
 1 3 -7 0.76 0.58
 -1 -3 7 0.71 0.59
 -1 -3 7 0.48 0.6
 -1 -3 7 0.79 0.52
 -1 -3 7 1.07 0.58
 1 3 -8 -1 0.73
 1 3 -8 0.66 0.69
 1 3 -8 -0.38 0.93
 1 3 -8 -0.53 0.72
 1 3 -8 -0.81 0.61
 -1 -3 8 -0.67 0.78
 -1 -3 8 0.96 0.78
 -1 -3 8 -0.23 0.81
 -1 -3 8 -0.22 0.55
 1 3 -9 1.87 0.97
 1 3 -9 1.34 1.04
 1 3 -9 0.98 1.05
 1 3 -9 0.34 1.37
 -1 -3 9 1.21 1.11
 -1 -3 9 0.51 1.09
 -1 -3 9 3.11 1.08
 2 3 9 1.34 1.17
 2 3 9 1.43 1.15
 -2 -3 -9 1.17 1.01
 -2 -3 -9 -0.25 1.13
 2 3 8 5.13 0.95
 2 3 8 8.63 0.96
 2 3 8 5.83 1.01
 2 3 8 8.31 0.98
 2 3 8 4.07 0.75
 2 3 8 5.57 0.6
 -2 -3 -8 2.41 0.95
 -2 -3 -8 3.46 0.7
 -2 -3 -8 5.75 0.86
 -2 -3 -8 5.19 0.97
 -2 -3 -8 5.66 0.82
 2 3 7 2.6 0.7
 2 3 7 2.1 0.62
 2 3 7 3.12 0.6
 2 3 7 1.77 0.5
 2 3 7 1.93 0.55
 2 3 7 1.98 0.48
 -2 -3 -7 2.44 0.54
 -2 -3 -7 3.03 0.7
 -2 -3 -7 2.52 0.73
 -2 -3 -7 1.45 0.54
 2 3 6 0.54 0.4
 2 3 6 -0.6 0.48
 2 3 6 -0.11 0.45
 2 3 6 -0.08 0.36
 2 3 6 0.32 0.41
 -2 -3 -6 0.22 0.59
 -2 -3 -6 -0.23 0.42
 -2 -3 -6 0.99 0.47
 -2 -3 -6 -0.4 0.46
 2 3 5 2.54 0.49
 2 3 5 2.81 0.49
 2 3 5 2.17 0.47
 2 3 5 2.45 0.44
 -2 -3 -5 2.36 0.46
 -2 -3 -5 2.62 0.25
 -2 -3 -5 2.2 0.46
 -2 -3 -5 3.36 0.65
 -2 -3 -5 2.58 0.48
 -2 -3 -5 2.89 0.34
 2 3 4 21.66 0.82
 2 3 4 20.91 0.83
 2 3 4 22.95 0.85
 2 3 4 22.48 0.81
 -2 -3 -4 21.62 0.58
 -2 -3 -4 22.46 0.84
 -2 -3 -4 22.31 0.64
 -2 -3 -4 21.6 0.88
 -2 -3 -4 21.85 0.81
 -2 -3 -4 21.57 0.83
 2 3 3 10.28 0.56
 2 3 3 10.04 0.59
 2 3 3 11.21 0.59
 2 3 3 9.42 0.58
 2 3 3 10.44 0.54
 -2 -3 -3 11.29 0.41
 -2 -3 -3 11.07 0.6
 -2 -3 -3 9.96 0.58
 -2 -3 -3 11.28 0.62
 -2 -3 -3 10.44 0.43
 -2 -3 -3 10.61 0.53
 2 3 2 4.38 0.37
 2 3 2 4.79 0.48
 2 3 2 3.91 0.43
 2 3 2 4.25 0.49
 2 3 2 4.61 0.43
 -2 -3 -2 4.9 0.37
 -2 -3 -2 4.2 0.49
 -2 -3 -2 4.66 0.44
 -2 -3 -2 4.3 0.37
 -2 -3 -2 4.44 0.44
 -2 -3 -2 4.8 0.5
 2 3 1 -0.08 0.24
 2 3 1 -0.06 0.23
 2 3 1 0.11 0.09
 2 3 1 0.03 0.22
 2 3 1 -0.11 0.26
 2 3 1 -0.04 0.21
 2 3 1 0.13 0.13
 -2 -3 -1 0.1 0.13
 -2 -3 -1 0 0.21
 -2 -3 -1 -0.05 0.24
 -2 -3 -1 0.28 0.24
 -2 -3 -1 0.06 0.24
 -2 -3 -1 -0.04 0.22
 2 3 0 253.97 3.85
 2 3 0 263.34 4.12
 2 3 0 256.8 4.08
 2 3 0 253.13 3.96
 2 3 0 263.13 3.84
 2 3 0 250.84 3.84
 2 3 0 259.55 4.19
 2 3 0 252.58 3.87
 2 3 0 250.76 4.25
 -2 -3 0 255.51 4.19
 -2 -3 0 264.92 3.96
 -2 -3 0 256.46 3.85
 -2 -3 0 261.08 3.9
 -2 -3 0 251.72 3.84
 -2 -3 0 254.26 4.12
 -2 -3 0 265.98 3.88
 -2 -3 0 255.89 4.09
 2 3 -1 81.92 1.48
 2 3 -1 83.56 1.42
 2 3 -1 85.64 1.49
 2 3 -1 81.29 1.3
 2 3 -1 82.83 1.41
 2 3 -1 83.74 1.48
 2 3 -1 80.94 1.49
 2 3 -1 84.36 1.66
 -2 -3 1 82.07 1.49
 -2 -3 1 84.3 1.66
 -2 -3 1 79.54 1.48
 -2 -3 1 83.72 1.48
 -2 -3 1 81.79 1.3
 -2 -3 1 82.43 1.38
 -2 -3 1 79.83 1.46
 -2 -3 1 83.8 1.35
 -2 -3 1 84.03 1.44
 -2 -3 1 83.99 1.41
 2 3 -2 1.21 0.3
 2 3 -2 0.85 0.25
 2 3 -2 0.91 0.28
 2 3 -2 0.86 0.31
 2 3 -2 1.18 0.23
 2 3 -2 1 0.24
 -2 -3 2 0.75 0.2
 -2 -3 2 1.24 0.26
 -2 -3 2 0.9 0.22
 -2 -3 2 0.91 0.28
 -2 -3 2 0.75 0.29
 -2 -3 2 0.61 0.31
 2 3 -3 2.13 0.35
 2 3 -3 2.55 0.27
 2 3 -3 2.89 0.39
 2 3 -3 2.44 0.31
 2 3 -3 2.34 0.33
 2 3 -3 2.27 0.31
 -2 -3 3 2.36 0.29
 -2 -3 3 2.68 0.39
 -2 -3 3 3.03 0.35
 -2 -3 3 2.4 0.36
 -2 -3 3 2.24 0.31
 2 3 -4 31.58 1.17
 2 3 -4 32.86 1.01
 2 3 -4 31.64 0.73
 2 3 -4 32.53 0.91
 2 3 -4 30.87 0.92
 2 3 -4 32.03 0.92
 -2 -3 4 30.97 1.05
 -2 -3 4 32.66 0.7
 -2 -3 4 32.43 1
 -2 -3 4 31.96 0.92
 2 3 -5 7.07 0.86
 2 3 -5 6.87 0.39
 2 3 -5 8.23 0.65
 2 3 -5 7.77 0.65
 2 3 -5 8.26 0.68
 2 3 -5 7.33 0.61
 -2 -3 5 7.44 0.71
 -2 -3 5 7.27 0.35
 -2 -3 5 7.29 0.65
 -2 -3 5 7.67 0.71
 2 3 -6 9.61 0.84
 2 3 -6 10.9 0.86
 2 3 -6 9.18 0.8
 2 3 -6 9.5 0.76
 2 3 -6 9.84 1.12
 -2 -3 6 9.8 0.81
 -2 -3 6 11.27 0.85
 -2 -3 6 9.32 0.8
 -2 -3 6 9.54 0.37
 -2 -3 6 9.46 0.91
 2 3 -7 2.65 0.67
 2 3 -7 1.87 0.58
 2 3 -7 1.28 0.58
 2 3 -7 0.64 0.73
 2 3 -7 2.28 0.51
 -2 -3 7 1.5 0.65
 -2 -3 7 1.67 0.61
 -2 -3 7 2.82 0.57
 -2 -3 7 1.74 0.64
 2 3 -8 3.12 0.88
 2 3 -8 2.39 0.87
 2 3 -8 2.74 0.77
 2 3 -8 4.62 0.76
 2 3 -8 1.17 0.98
 -2 -3 8 3.64 0.85
 -2 -3 8 2.03 0.66
 -2 -3 8 4.22 0.81
 -2 -3 8 1.5 0.86
 2 3 -9 2.75 1.11
 2 3 -9 1.64 1.33
 2 3 -9 4.33 1.18
 2 3 -9 5.03 1.08
 -2 -3 9 2.59 1.22
 -2 -3 9 1.55 1.16
 -2 -3 9 3.23 1.08
 3 3 8 -0.33 0.56
 3 3 8 0.5 0.64
 3 3 8 0.32 0.87
 3 3 8 1.13 0.63
 3 3 8 0.64 0.87
 3 3 8 2.05 0.68
 -3 -3 -8 -0.02 0.89
 -3 -3 -8 -1.11 0.63
 -3 -3 -8 -0.64 0.82
 -3 -3 -8 1.14 0.62
 3 3 7 0.24 0.49
 3 3 7 1.48 0.53
 3 3 7 0.45 0.52
 3 3 7 0.76 0.48
 3 3 7 1.03 0.64
 3 3 7 1.95 0.65
 -3 -3 -7 1.32 0.52
 -3 -3 -7 0.11 0.66
 -3 -3 -7 1.47 0.54
 -3 -3 -7 1.29 0.69
 3 3 6 34.14 1.03
 3 3 6 37.66 1.3
 3 3 6 37.8 1.29
 3 3 6 38.14 1.31
 3 3 6 39.71 1.35
 -3 -3 -6 38.66 1.35
 -3 -3 -6 37.81 1.73
 -3 -3 -6 36.84 1.34
 -3 -3 -6 38.58 1.09
 -3 -3 -6 37.23 1.29
 3 3 5 2.95 0.5
 3 3 5 4.08 0.52
 3 3 5 3.92 0.52
 3 3 5 3.27 0.48
 3 3 5 3.5 0.45
 -3 -3 -5 4.29 0.53
 -3 -3 -5 4.04 0.49
 -3 -3 -5 3.41 0.62
 -3 -3 -5 3.72 0.55
 -3 -3 -5 4.07 0.5
 -3 -3 -5 3.8 0.38
 3 3 4 8.53 0.65
 3 3 4 8.17 0.61
 3 3 4 7.57 0.6
 3 3 4 7.54 0.61
 3 3 4 9.28 0.63
 -3 -3 -4 8.06 0.68
 -3 -3 -4 8.66 0.59
 -3 -3 -4 7.39 0.59
 -3 -3 -4 7.08 0.61
 -3 -3 -4 8.89 0.48
 3 3 3 3.25 0.4
 3 3 3 2.64 0.38
 3 3 3 2.78 0.32
 3 3 3 2.59 0.39
 3 3 3 3.21 0.4
 -3 -3 -3 2.98 0.41
 -3 -3 -3 3.06 0.4
 -3 -3 -3 2.74 0.31
 -3 -3 -3 3.07 0.39
 -3 -3 -3 3.29 0.44
 3 3 2 11.08 0.49
 3 3 2 11.46 0.44
 3 3 2 11.41 0.55
 3 3 2 12.15 0.61
 3 3 2 11.65 0.58
 3 3 2 11.02 0.57
 -3 -3 -2 11.67 0.42
 -3 -3 -2 11.21 0.55
 -3 -3 -2 11.97 0.5
 -3 -3 -2 11.53 0.59
 -3 -3 -2 11.31 0.54
 -3 -3 -2 11.15 0.59
 3 3 1 11.37 0.52
 3 3 1 11.08 0.55
 3 3 1 10.76 0.48
 3 3 1 10.04 0.48
 3 3 1 11.01 0.28
 3 3 1 11.34 0.55
 -3 -3 -1 10.95 0.28
 -3 -3 -1 10.94 0.51
 -3 -3 -1 10.85 0.49
 -3 -3 -1 10.71 0.48
 -3 -3 -1 11.29 0.53
 -3 -3 -1 10.95 0.52
 -3 -3 -1 10.29 0.51
 -3 -3 -1 10.7 0.28
 3 3 0 17.59 0.62
 3 3 0 16.47 0.33
 3 3 0 17.25 0.57
 3 3 0 17.93 0.55
 3 3 0 17.2 0.46
 3 3 0 17.57 0.63
 3 3 0 17.5 0.49
 -3 -3 0 17.02 0.63
 -3 -3 0 16.61 0.6
 -3 -3 0 17 0.32
 -3 -3 0 17.18 0.47
 -3 -3 0 16.31 0.47
 -3 -3 0 16.78 0.58
 -3 -3 0 17.49 0.59
 3 3 -1 3.81 0.35
 3 3 -1 4.52 0.45
 3 3 -1 4.04 0.41
 3 3 -1 3.36 0.34
 3 3 -1 3.71 0.43
 3 3 -1 3.75 0.28
 3 3 -1 3.35 0.42
 3 3 -1 3.07 0.35
 -3 -3 1 3.96 0.26
 -3 -3 1 4 0.27
 -3 -3 1 3.84 0.32
 -3 -3 1 3.11 0.37
 -3 -3 1 3.94 0.33
 -3 -3 1 3.18 0.35
 -3 -3 1 3.7 0.4
 -3 -3 1 3.53 0.27
 3 3 -2 14.17 0.51
 3 3 -2 13.47 0.56
 3 3 -2 13.68 0.54
 3 3 -2 13.37 0.57
 3 3 -2 13.84 0.47
 3 3 -2 13.17 0.59
 3 3 -2 14.23 0.49
 -3 -3 2 13.62 0.46
 -3 -3 2 12.9 0.53
 -3 -3 2 13.54 0.49
 -3 -3 2 14.2 0.59
 -3 -3 2 13.2 0.59
 -3 -3 2 14.96 0.51
 -3 -3 2 13.33 0.44
 3 3 -3 1.1 0.29
 3 3 -3 0.99 0.28
 3 3 -3 0.96 0.32
 3 3 -3 0.96 0.3
 3 3 -3 1.1 0.33
 3 3 -3 1.6 0.29
 -3 -3 3 1.46 0.21
 -3 -3 3 1.66 0.33
 -3 -3 3 1.14 0.32
 -3 -3 3 1.35 0.28
 -3 -3 3 0.96 0.37
 3 3 -4 42.91 1.1
 3 3 -4 45.71 1.09
 3 3 -4 44.6 1.34
 3 3 -4 45.61 1.16
 3 3 -4 43.55 1.09
 3 3 -4 45.02 1.2
 3 3 -4 43.88 1
 -3 -3 4 44.17 1.09
 -3 -3 4 44.59 1.22
 -3 -3 4 44.33 1.28
 -3 -3 4 45.66 1.1
 -3 -3 4 43.91 0.87
 3 3 -5 -0.1 0.36
 3 3 -5 -0.24 0.35
 3 3 -5 -0.35 0.4
 3 3 -5 0.13 0.37
 3 3 -5 -0.03 0.36
 3 3 -5 -0.09 0.26
 3 3 -5 0.04 0.34
 -3 -3 5 0.08 0.4
 -3 -3 5 0.21 0.35
 -3 -3 5 -0.29 0.35
 3 3 -6 8.89 0.77
 3 3 -6 7.59 0.83
 3 3 -6 8.52 0.81
 3 3 -6 7.87 0.81
 3 3 -6 7.14 0.5
 3 3 -6 7.24 1.08
 -3 -3 6 7.09 0.69
 -3 -3 6 7.28 0.91
 -3 -3 6 7.74 0.82
 3 3 -7 0.45 0.6
 3 3 -7 0.57 0.61
 3 3 -7 0.88 0.58
 3 3 -7 1 0.51
 3 3 -7 0.27 0.71
 -3 -3 7 -0.1 0.54
 -3 -3 7 0.28 0.45
 -3 -3 7 0.7 0.58
 -3 -3 7 0.26 0.6
 3 3 -8 6.12 0.9
 3 3 -8 6.91 0.9
 3 3 -8 5.86 0.74
 3 3 -8 6.27 0.98
 3 3 -8 7.39 0.87
 3 3 -8 4.25 1.05
 -3 -3 8 5.25 0.95
 -3 -3 8 5.35 0.9
 -3 -3 8 4.77 0.88
 -3 -3 8 6.73 0.81
 3 3 -9 0.4 1.01
 3 3 -9 -1.56 1.02
 3 3 -9 0.15 1.03
 3 3 -9 -0.42 1.28
 -3 -3 9 2.89 1.01
 -3 -3 9 -0.51 1.12
 -3 -3 9 2.05 1.09
 4 3 8 8.85 0.9
 4 3 8 9.84 1.24
 4 3 8 9.34 1.13
 4 3 8 9 1.05
 4 3 8 10.9 1.02
 4 3 8 9.38 1.16
 -4 -3 -8 11.07 1.18
 -4 -3 -8 11.65 1.05
 -4 -3 -8 6.45 1.01
 -4 -3 -8 9.64 0.99
 4 3 7 2.1 0.44
 4 3 7 2.59 0.58
 4 3 7 1.96 0.64
 4 3 7 2.27 0.75
 4 3 7 3.14 0.62
 4 3 7 1.26 0.68
 -4 -3 -7 1.81 0.53
 -4 -3 -7 2.61 0.65
 -4 -3 -7 2.16 0.74
 -4 -3 -7 1.99 0.72
 4 3 6 1.62 0.46
 4 3 6 1.07 0.54
 4 3 6 1.3 0.56
 4 3 6 2.64 0.55
 4 3 6 1.16 0.32
 -4 -3 -6 0.27 0.53
 -4 -3 -6 1.18 0.6
 -4 -3 -6 1.3 0.39
 -4 -3 -6 1.86 0.56
 -4 -3 -6 1.38 0.57
 -4 -3 -6 1.62 0.54
 4 3 5 0.33 0.4
 4 3 5 0.14 0.38
 4 3 5 -0.07 0.35
 4 3 5 0.59 0.41
 4 3 5 -0.14 0.22
 4 3 5 0.5 0.4
 -4 -3 -5 0.41 0.32
 -4 -3 -5 0.29 0.56
 -4 -3 -5 1.1 0.43
 -4 -3 -5 0.09 0.38
 -4 -3 -5 -0.11 0.39
 -4 -3 -5 0.46 0.41
 4 3 4 6.33 0.59
 4 3 4 6.57 0.64
 4 3 4 7.05 0.65
 4 3 4 5.43 0.56
 4 3 4 5.26 0.25
 4 3 4 5.15 0.59
 -4 -3 -4 5.59 0.56
 -4 -3 -4 6.07 0.57
 -4 -3 -4 5.63 0.62
 -4 -3 -4 5.42 0.71
 -4 -3 -4 5.82 0.63
 4 3 3 16.58 0.75
 4 3 3 16.41 0.71
 4 3 3 15.64 0.72
 4 3 3 16.4 0.59
 4 3 3 16.32 0.71
 4 3 3 16.61 0.61
 -4 -3 -3 16.34 0.6
 -4 -3 -3 16.54 0.73
 -4 -3 -3 17.93 0.73
 -4 -3 -3 16.18 0.71
 -4 -3 -3 16.34 0.73
 4 3 2 30.04 0.88
 4 3 2 29.64 0.79
 4 3 2 29.99 0.84
 4 3 2 29.15 0.66
 4 3 2 30.61 0.88
 4 3 2 28.85 0.85
 -4 -3 -2 29.15 0.66
 -4 -3 -2 30.12 0.85
 -4 -3 -2 29.14 0.87
 -4 -3 -2 28.5 0.77
 -4 -3 -2 30.24 0.88
 -4 -3 -2 29.71 0.86
 4 3 1 14.67 0.61
 4 3 1 14.01 0.56
 4 3 1 14 0.59
 4 3 1 14.97 0.63
 4 3 1 14.35 0.57
 4 3 1 14.51 0.3
 -4 -3 -1 14.01 0.57
 -4 -3 -1 13.96 0.63
 -4 -3 -1 13.51 0.55
 -4 -3 -1 15.31 0.66
 -4 -3 -1 13.5 0.58
 4 3 0 27.31 0.81
 4 3 0 26.68 0.78
 4 3 0 26.62 0.77
 4 3 0 26.9 0.68
 4 3 0 26.96 0.7
 4 3 0 26.14 0.65
 4 3 0 27.88 0.48
 -4 -3 0 25.35 0.76
 -4 -3 0 26.83 0.67
 -4 -3 0 26.41 0.67
 -4 -3 0 25.55 0.76
 -4 -3 0 26.51 0.81
 -4 -3 0 24.92 0.74
 4 3 -1 5.6 0.37
 4 3 -1 6.05 0.48
 4 3 -1 5.7 0.37
 4 3 -1 5.57 0.49
 4 3 -1 6.52 0.55
 4 3 -1 6.14 0.38
 4 3 -1 5.71 0.55
 4 3 -1 5.69 0.36
 -4 -3 1 5.78 0.48
 -4 -3 1 5.58 0.48
 -4 -3 1 5.36 0.51
 -4 -3 1 5.69 0.36
 -4 -3 1 6.56 0.35
 -4 -3 1 5.48 0.39
 -4 -3 1 5.84 0.34
 4 3 -2 55.46 1.18
 4 3 -2 54.93 1.14
 4 3 -2 54.34 1.06
 4 3 -2 55.31 1.26
 4 3 -2 54.31 1.16
 4 3 -2 54.41 1.14
 4 3 -2 53.99 1.22
 4 3 -2 55.19 1.21
 -4 -3 2 55.34 1.14
 -4 -3 2 55.14 1.15
 -4 -3 2 55.51 1.19
 -4 -3 2 54.08 0.99
 -4 -3 2 54.42 1.05
 -4 -3 2 54.7 1.07
 4 3 -3 3.17 0.43
 4 3 -3 3.03 0.36
 4 3 -3 2.59 0.31
 4 3 -3 2.45 0.26
 4 3 -3 2.15 0.36
 4 3 -3 2.67 0.42
 4 3 -3 2.61 0.37
 -4 -3 3 2.4 0.35
 -4 -3 3 3.09 0.33
 -4 -3 3 2.81 0.26
 -4 -3 3 2.75 0.38
 4 3 -4 5.34 0.54
 4 3 -4 4.4 0.45
 4 3 -4 3.98 0.51
 4 3 -4 4.54 0.59
 4 3 -4 4.12 0.49
 4 3 -4 4 0.49
 -4 -3 4 3.16 0.43
 -4 -3 4 5.06 0.55
 -4 -3 4 4.31 0.49
 -4 -3 4 3.76 0.42
 4 3 -5 5.8 0.64
 4 3 -5 5.7 0.58
 4 3 -5 5.56 0.67
 4 3 -5 6.11 0.64
 4 3 -5 5.5 0.8
 4 3 -5 6.56 0.71
 4 3 -5 6.18 0.62
 -4 -3 5 6.23 0.65
 -4 -3 5 6.89 0.76
 -4 -3 5 5.8 0.61
 4 3 -6 15.98 0.92
 4 3 -6 15.49 0.88
 4 3 -6 15.53 1.18
 4 3 -6 14.28 0.91
 4 3 -6 14.83 0.73
 4 3 -6 15.22 0.95
 4 3 -6 15.79 0.91
 -4 -3 6 15.97 1.09
 -4 -3 6 15.33 0.97
 -4 -3 6 17.23 0.95
 4 3 -7 -0.58 0.7
 4 3 -7 0.37 0.62
 4 3 -7 0.27 0.5
 4 3 -7 0.85 0.57
 4 3 -7 0.04 0.56
 4 3 -7 0.3 0.35
 4 3 -7 -0.46 0.58
 -4 -3 7 -0.79 0.59
 -4 -3 7 0.2 0.51
 -4 -3 7 -0.26 0.64
 -4 -3 7 -0.58 0.56
 4 3 -8 0.58 0.73
 4 3 -8 -0.45 0.64
 4 3 -8 0.61 0.59
 4 3 -8 -0.94 0.91
 4 3 -8 -0.1 0.79
 4 3 -8 0.84 0.74
 -4 -3 8 1.23 0.63
 -4 -3 8 0.32 0.82
 -4 -3 8 0.93 0.76
 -4 -3 8 -0.41 0.79
 4 3 -9 1.07 1
 4 3 -9 0.51 1.01
 4 3 -9 0.82 1.34
 4 3 -9 1.12 1.12
 -4 -3 9 -1.34 1.05
 -4 -3 9 0.15 1.07
 5 3 8 3.83 1.04
 5 3 8 4.21 1.12
 5 3 8 2.85 0.91
 -5 -3 -8 5.1 1.12
 -5 -3 -8 5.47 0.8
 5 3 7 8.81 0.86
 5 3 7 7.11 0.88
 5 3 7 8.29 0.97
 5 3 7 9.99 1.01
 5 3 7 7.2 0.85
 -5 -3 -7 11.27 1.08
 -5 -3 -7 6.77 0.96
 -5 -3 -7 8.05 0.91
 -5 -3 -7 7.03 0.85
 -5 -3 -7 8.46 0.87
 5 3 6 2.88 0.63
 5 3 6 3.3 0.56
 5 3 6 1.83 0.63
 5 3 6 3.11 0.57
 5 3 6 3.45 0.52
 -5 -3 -6 2.46 0.63
 -5 -3 -6 3.2 0.69
 -5 -3 -6 2.17 0.52
 -5 -3 -6 2.14 0.46
 -5 -3 -6 1.82 0.68
 -5 -3 -6 3.12 0.53
 5 3 5 12.97 0.87
 5 3 5 10.37 0.86
 5 3 5 12.32 0.84
 5 3 5 13.68 0.8
 5 3 5 11.47 0.83
 -5 -3 -5 12.34 0.72
 -5 -3 -5 12.5 0.83
 -5 -3 -5 13.42 0.87
 -5 -3 -5 12.4 0.77
 -5 -3 -5 13.01 1.25
 -5 -3 -5 13.53 0.89
 5 3 4 61.36 1.49
 5 3 4 61.13 1.56
 5 3 4 63.2 1.54
 5 3 4 60.4 1.56
 5 3 4 60.21 1.37
 -5 -3 -4 62.22 1.38
 -5 -3 -4 60.11 1.51
 -5 -3 -4 62.23 1.98
 -5 -3 -4 61.78 1.53
 -5 -3 -4 62.16 1.59
 5 3 3 23.96 0.88
 5 3 3 20.6 0.85
 5 3 3 22.67 0.83
 5 3 3 22.72 0.86
 5 3 3 23.29 0.76
 5 3 3 22.52 0.69
 -5 -3 -3 22.09 0.74
 -5 -3 -3 22.73 0.88
 -5 -3 -3 22.64 0.86
 -5 -3 -3 23.98 1.21
 -5 -3 -3 22.72 0.68
 -5 -3 -3 22.62 0.84
 -5 -3 -3 23.46 0.87
 5 3 2 38.19 1.03
 5 3 2 39.64 0.99
 5 3 2 38.03 1.05
 5 3 2 38.24 1.03
 5 3 2 39.05 0.79
 5 3 2 38.12 1.04
 -5 -3 -2 38.69 1.05
 -5 -3 -2 37.65 1.02
 -5 -3 -2 38.66 1.05
 -5 -3 -2 37.22 1.03
 -5 -3 -2 37.14 0.95
 5 3 1 3.07 0.17
 5 3 1 3.29 0.36
 5 3 1 3.13 0.4
 5 3 1 3.37 0.41
 5 3 1 3.08 0.35
 5 3 1 2.84 0.36
 -5 -3 -1 3.16 0.4
 -5 -3 -1 2.92 0.36
 -5 -3 -1 2.91 0.33
 -5 -3 -1 3.69 0.38
 -5 -3 -1 4.05 0.43
 5 3 0 183.48 2.81
 5 3 0 184.29 3.17
 5 3 0 185.95 3.22
 5 3 0 183.41 3.18
 5 3 0 184.99 3.01
 5 3 0 182.62 2.98
 5 3 0 181.91 3.07
 -5 -3 0 184.51 3.17
 -5 -3 0 186.95 3.14
 -5 -3 0 182.15 3.11
 -5 -3 0 185.64 3
 -5 -3 0 181.88 2.99
 -5 -3 0 187.54 3.08
 5 3 -1 15.67 0.68
 5 3 -1 15.89 0.5
 5 3 -1 16.33 0.72
 5 3 -1 15.33 0.63
 5 3 -1 15.34 0.53
 5 3 -1 15.17 0.54
 5 3 -1 16.04 0.55
 -5 -3 1 15.58 0.64
 -5 -3 1 15.42 0.52
 -5 -3 1 16.47 0.49
 -5 -3 1 16.01 0.69
 -5 -3 1 16.06 0.55
 -5 -3 1 16.56 0.53
 -5 -3 1 15.62 0.65
 -5 -3 1 15.22 0.42
 5 3 -2 6.35 0.49
 5 3 -2 7.39 0.55
 5 3 -2 5.56 0.48
 5 3 -2 6.43 0.53
 5 3 -2 6.16 0.37
 5 3 -2 6.34 0.43
 5 3 -2 7.87 0.63
 -5 -3 2 6.42 0.5
 -5 -3 2 7.11 0.48
 -5 -3 2 5.95 0.42
 -5 -3 2 5.76 0.39
 5 3 -3 16.15 0.55
 5 3 -3 16.67 0.76
 5 3 -3 15.34 0.58
 5 3 -3 16.65 0.73
 5 3 -3 16.09 0.73
 5 3 -3 16.79 0.61
 -5 -3 3 16.49 0.72
 -5 -3 3 15.77 0.68
 -5 -3 3 15.73 0.49
 -5 -3 3 15.95 0.62
 -5 -3 3 16.31 0.69
 5 3 -4 3.44 0.39
 5 3 -4 2.87 0.36
 5 3 -4 3.92 0.45
 5 3 -4 3.66 0.53
 5 3 -4 3.13 0.46
 5 3 -4 4.16 0.46
 -5 -3 4 3.2 0.45
 -5 -3 4 2.9 0.41
 -5 -3 4 3.29 0.37
 -5 -3 4 3.19 0.39
 -5 -3 4 2.9 0.48
 5 3 -5 0.52 0.4
 5 3 -5 0.22 0.39
 5 3 -5 0.53 0.4
 5 3 -5 0.74 0.39
 5 3 -5 -0.13 0.36
 -5 -3 5 -0.13 0.4
 -5 -3 5 0.81 0.44
 -5 -3 5 0.6 0.41
 -5 -3 5 0.13 0.38
 5 3 -6 2.3 0.59
 5 3 -6 4.27 0.59
 5 3 -6 2.88 0.48
 5 3 -6 3.91 0.61
 5 3 -6 3.47 0.57
 5 3 -6 2.57 0.55
 5 3 -6 3.16 0.58
 -5 -3 6 2.45 0.54
 -5 -3 6 3.07 0.62
 -5 -3 6 2.74 0.56
 5 3 -7 0.56 0.57
 5 3 -7 0.32 0.61
 5 3 -7 0.32 0.62
 5 3 -7 -0.37 0.67
 5 3 -7 0.07 0.44
 5 3 -7 -0.73 0.48
 5 3 -7 0.85 0.56
 -5 -3 7 -0.06 0.66
 -5 -3 7 -0.1 0.66
 -5 -3 7 0.21 0.52
 5 3 -8 1.09 0.49
 5 3 -8 0.64 0.6
 5 3 -8 0.05 0.74
 5 3 -8 1.29 0.78
 5 3 -8 0.34 0.84
 5 3 -8 0.69 0.79
 5 3 -8 -0.12 0.94
 -5 -3 8 1.22 0.56
 -5 -3 8 1.02 0.85
 -5 -3 8 1.66 0.86
 -5 -3 8 0.99 0.8
 5 3 -9 -2.15 1.27
 5 3 -9 -1.38 1.06
 5 3 -9 -1.22 1.1
 -5 -3 9 -1.15 1.09
 -5 -3 9 -0.91 1.02
 -5 -3 9 0.42 1.11
 6 3 8 0.37 1.09
 6 3 8 -0.36 1.02
 6 3 8 -0.35 0.96
 -6 -3 -8 0.42 1.08
 6 3 7 4.7 0.83
 6 3 7 5.28 0.68
 6 3 7 5.27 0.97
 6 3 7 4.27 0.68
 -6 -3 -7 3.55 0.83
 -6 -3 -7 4.42 0.64
 -6 -3 -7 4.02 0.69
 -6 -3 -7 7.82 0.89
 -6 -3 -7 4.93 0.72
 -6 -3 -7 5.31 0.88
 -6 -3 -7 5.87 0.97
 6 3 6 7.81 0.83
 6 3 6 5.87 0.68
 6 3 6 7.07 0.86
 6 3 6 5.9 0.72
 6 3 6 5.47 0.7
 -6 -3 -6 6.09 0.68
 -6 -3 -6 5.71 0.81
 -6 -3 -6 5.8 0.89
 -6 -3 -6 6.74 0.72
 -6 -3 -6 6.42 0.65
 -6 -3 -6 6.33 0.73
 -6 -3 -6 6.86 0.86
 6 3 5 2.57 0.49
 6 3 5 2.78 0.5
 6 3 5 2.37 0.56
 6 3 5 1.97 0.47
 6 3 5 2.66 0.51
 -6 -3 -5 3.04 0.59
 -6 -3 -5 2.73 0.52
 -6 -3 -5 3.33 0.61
 -6 -3 -5 2.95 0.53
 -6 -3 -5 2.58 0.49
 -6 -3 -5 1.92 0.66
 6 3 4 2.34 0.46
 6 3 4 2.43 0.45
 6 3 4 2.4 0.4
 6 3 4 2.11 0.38
 6 3 4 2.98 0.52
 6 3 4 1.72 0.45
 -6 -3 -4 2.39 0.6
 -6 -3 -4 2.21 0.41
 -6 -3 -4 2.53 0.48
 -6 -3 -4 2.29 0.38
 -6 -3 -4 2.29 0.48
 -6 -3 -4 2.54 0.49
 -6 -3 -4 2.42 0.48
 6 3 3 14.42 0.68
 6 3 3 14.84 0.77
 6 3 3 15.35 0.78
 6 3 3 14.46 0.58
 6 3 3 14.12 0.73
 6 3 3 16.32 0.79
 -6 -3 -3 15.04 0.73
 -6 -3 -3 14.26 0.75
 -6 -3 -3 14.27 0.67
 -6 -3 -3 15.97 0.81
 -6 -3 -3 14.58 0.77
 -6 -3 -3 16.23 1.07
 6 3 2 6.73 0.6
 6 3 2 7.45 0.61
 6 3 2 5.66 0.59
 6 3 2 6.77 0.57
 6 3 2 6.47 0.56
 6 3 2 6.45 0.35
 -6 -3 -2 6.72 0.6
 -6 -3 -2 5.28 0.53
 -6 -3 -2 6.83 0.8
 -6 -3 -2 6.42 0.55
 -6 -3 -2 6.51 0.57
 -6 -3 -2 6.91 0.62
 6 3 1 2.53 0.37
 6 3 1 3.17 0.41
 6 3 1 2.41 0.19
 6 3 1 2.28 0.37
 6 3 1 3.05 0.44
 6 3 1 2.75 0.4
 6 3 1 2.95 0.41
 -6 -3 -1 2.35 0.38
 -6 -3 -1 3.09 0.44
 -6 -3 -1 2.9 0.42
 -6 -3 -1 2.1 0.37
 -6 -3 -1 2.67 0.38
 -6 -3 -1 2.61 0.4
 6 3 0 5 0.53
 6 3 0 5.24 0.48
 6 3 0 4.68 0.59
 6 3 0 5.12 0.28
 6 3 0 4.56 0.45
 6 3 0 4.63 0.54
 6 3 0 4.78 0.42
 -6 -3 0 3.71 0.42
 -6 -3 0 4.43 0.48
 -6 -3 0 5.58 0.51
 -6 -3 0 4.67 0.48
 -6 -3 0 4.79 0.54
 -6 -3 0 5.04 0.56
 -6 -3 0 4.81 0.59
 6 3 -1 82.47 1.51
 6 3 -1 83.95 1.7
 6 3 -1 88.56 1.79
 6 3 -1 84.4 1.5
 6 3 -1 83.86 1.6
 6 3 -1 81.74 1.75
 6 3 -1 83.24 1.57
 -6 -3 1 80.59 1.64
 -6 -3 1 84.25 1.67
 -6 -3 1 85.57 1.59
 -6 -3 1 84.49 1.58
 -6 -3 1 83.46 1.57
 -6 -3 1 83.28 1.68
 -6 -3 1 84.63 1.71
 6 3 -2 -0.17 0.32
 6 3 -2 0.06 0.28
 6 3 -2 0.25 0.25
 6 3 -2 -0.05 0.37
 6 3 -2 0.3 0.28
 6 3 -2 -0.07 0.2
 -6 -3 2 0.2 0.32
 -6 -3 2 0.01 0.23
 -6 -3 2 -0.14 0.31
 -6 -3 2 0.11 0.25
 -6 -3 2 0.11 0.24
 -6 -3 2 0.29 0.26
 6 3 -3 30.18 0.85
 6 3 -3 29.03 0.83
 6 3 -3 28.84 0.65
 6 3 -3 30.43 0.95
 6 3 -3 29.99 0.98
 6 3 -3 30.56 0.94
 -6 -3 3 29.18 0.87
 -6 -3 3 29.97 0.83
 -6 -3 3 29 0.83
 -6 -3 3 28.92 0.68
 -6 -3 3 29.73 0.93
 -6 -3 3 30.65 0.95
 6 3 -4 5.52 0.47
 6 3 -4 6.84 0.69
 6 3 -4 5.08 0.55
 6 3 -4 5.75 0.52
 6 3 -4 6.42 0.59
 6 3 -4 6.78 0.64
 -6 -3 4 5.5 0.64
 -6 -3 4 5.62 0.6
 -6 -3 4 5.62 0.57
 -6 -3 4 5.75 0.4
 6 3 -5 4.36 0.56
 6 3 -5 5.74 0.65
 6 3 -5 5.37 0.71
 6 3 -5 5.44 0.62
 6 3 -5 4.99 0.57
 6 3 -5 5 0.52
 -6 -3 5 4.92 0.53
 -6 -3 5 4.57 0.52
 -6 -3 5 4.99 0.46
 -6 -3 5 5.31 0.59
 -6 -3 5 4.15 0.64
 6 3 -6 2.05 0.51
 6 3 -6 2.08 0.54
 6 3 -6 2.11 0.51
 6 3 -6 1.76 0.55
 6 3 -6 1.35 0.56
 6 3 -6 1.51 0.53
 -6 -3 6 3.4 0.54
 -6 -3 6 1.29 0.54
 -6 -3 6 1.52 0.65
 -6 -3 6 1.66 0.37
 -6 -3 6 1.87 0.55
 6 3 -7 3.95 0.64
 6 3 -7 3.51 0.71
 6 3 -7 3.64 0.78
 6 3 -7 3.5 0.75
 6 3 -7 4.02 0.64
 6 3 -7 3.53 0.69
 -6 -3 7 4.38 0.82
 -6 -3 7 4.1 0.76
 -6 -3 7 3.34 0.65
 6 3 -8 7.19 0.96
 6 3 -8 5.83 1
 6 3 -8 5.82 1.09
 6 3 -8 5.75 0.71
 6 3 -8 3.83 0.71
 6 3 -8 8.44 1.03
 -6 -3 8 4.7 0.96
 -6 -3 8 5.67 0.79
 -6 -3 8 6.57 1.1
 6 3 -9 3.65 1.23
 6 3 -9 3.81 1.19
 -6 -3 9 3.7 1.25
 -6 -3 9 2.03 1.29
 -6 -3 9 4.57 1.33
 7 3 7 1.35 0.69
 7 3 7 1.77 0.83
 7 3 7 2.38 0.67
 7 3 7 2.52 1.01
 -7 -3 -7 2.85 0.92
 -7 -3 -7 3.69 0.69
 -7 -3 -7 1.46 0.65
 -7 -3 -7 2.89 0.7
 -7 -3 -7 2.27 0.7
 7 3 6 0.46 0.58
 7 3 6 -0.68 0.58
 7 3 6 -0.53 0.66
 7 3 6 -0.35 0.49
 7 3 6 -0.79 0.53
 -7 -3 -6 -0.27 0.62
 -7 -3 -6 0.37 0.63
 -7 -3 -6 -0.39 0.54
 -7 -3 -6 -0.73 0.52
 -7 -3 -6 0.69 0.52
 -7 -3 -6 0.61 0.51
 7 3 5 4.2 0.59
 7 3 5 4.85 0.67
 7 3 5 3.63 0.55
 7 3 5 4.01 0.57
 7 3 5 4.68 0.69
 -7 -3 -5 5.73 0.66
 -7 -3 -5 4.17 0.63
 -7 -3 -5 2.62 0.7
 -7 -3 -5 4.32 0.55
 -7 -3 -5 3.45 0.63
 7 3 4 0.01 0.36
 7 3 4 0.54 0.39
 7 3 4 0.76 0.35
 7 3 4 0.32 0.41
 7 3 4 0.43 0.4
 7 3 4 0.36 0.45
 -7 -3 -4 0.54 0.56
 -7 -3 -4 -0.66 0.43
 -7 -3 -4 1.43 0.46
 -7 -3 -4 0.05 0.39
 -7 -3 -4 0.08 0.4
 -7 -3 -4 0.74 0.41
 7 3 3 27.8 0.97
 7 3 3 30.84 1.06
 7 3 3 29.74 1.06
 7 3 3 28.46 0.77
 7 3 3 28.53 1.04
 7 3 3 30.41 1.08
 -7 -3 -3 28.14 1.34
 -7 -3 -3 28.84 1.05
 -7 -3 -3 28.61 1.05
 -7 -3 -3 28.16 0.93
 -7 -3 -3 28.85 1.04
 -7 -3 -3 30.1 1.09
 7 3 2 1.64 0.4
 7 3 2 1.84 0.39
 7 3 2 1.76 0.38
 7 3 2 1.78 0.21
 7 3 2 1.62 0.38
 7 3 2 1.8 0.41
 -7 -3 -2 1.68 0.37
 -7 -3 -2 1.34 0.37
 -7 -3 -2 1.53 0.41
 -7 -3 -2 2.12 0.45
 -7 -3 -2 1.93 0.38
 -7 -3 -2 1.74 0.4
 7 3 1 59.84 1.37
 7 3 1 58.83 1.35
 7 3 1 58.46 1.42
 7 3 1 57.53 0.99
 7 3 1 57.35 1.43
 7 3 1 59.3 1.37
 -7 -3 -1 57.83 1.34
 -7 -3 -1 59.17 1.44
 -7 -3 -1 59.12 1.42
 -7 -3 -1 60.67 1.63
 -7 -3 -1 58.68 1.36
 -7 -3 -1 58.64 1.36
 7 3 0 59.86 1.41
 7 3 0 59.3 1.46
 7 3 0 59.18 1.33
 7 3 0 60.16 1.3
 7 3 0 60.26 1.43
 7 3 0 59.29 1.05
 7 3 0 59.23 1.26
 -7 -3 0 59.73 1.43
 -7 -3 0 58.29 1.31
 -7 -3 0 57.79 1.36
 -7 -3 0 60.38 1.45
 -7 -3 0 59.11 1.46
 -7 -3 0 60.2 1.33
 7 3 -1 12.63 0.7
 7 3 -1 14.03 0.73
 7 3 -1 12.62 0.63
 7 3 -1 12.64 0.51
 7 3 -1 11.65 0.68
 7 3 -1 12.05 0.59
 7 3 -1 12.37 0.57
 -7 -3 1 12.36 0.44
 -7 -3 1 11.18 0.67
 -7 -3 1 11.61 0.68
 -7 -3 1 12.13 0.59
 -7 -3 1 12.24 0.61
 -7 -3 1 11.91 0.7
 7 3 -2 84.31 1.78
 7 3 -2 86.1 1.87
 7 3 -2 84.39 1.65
 7 3 -2 84.87 1.66
 7 3 -2 85.17 1.8
 7 3 -2 85.11 1.52
 -7 -3 2 85.02 1.73
 -7 -3 2 85.98 1.65
 -7 -3 2 85.55 1.64
 -7 -3 2 84.91 1.81
 -7 -3 2 83.93 1.77
 -7 -3 2 85.47 1.65
 7 3 -3 14.1 0.78
 7 3 -3 13.02 0.67
 7 3 -3 12.89 0.71
 7 3 -3 14.21 0.65
 7 3 -3 14.52 0.77
 7 3 -3 15.29 0.75
 -7 -3 3 13.03 0.66
 -7 -3 3 13.69 0.66
 -7 -3 3 13.01 0.62
 -7 -3 3 13.4 0.74
 -7 -3 3 14.15 0.7
 7 3 -4 16.41 0.76
 7 3 -4 16.81 0.86
 7 3 -4 16.22 0.54
 7 3 -4 17.14 0.79
 7 3 -4 16.98 0.89
 7 3 -4 16.45 0.69
 -7 -3 4 18.24 0.88
 -7 -3 4 17.12 0.75
 -7 -3 4 17.17 0.78
 -7 -3 4 17.16 0.81
 7 3 -5 12.51 0.94
 7 3 -5 13.35 0.81
 7 3 -5 12.3 0.75
 7 3 -5 12.55 0.8
 7 3 -5 12.23 0.82
 7 3 -5 12.45 0.84
 -7 -3 5 12.33 0.51
 -7 -3 5 12.08 0.79
 -7 -3 5 13.36 0.93
 -7 -3 5 13.16 0.85
 7 3 -6 2.71 0.61
 7 3 -6 2.37 0.6
 7 3 -6 2.27 0.64
 7 3 -6 2 0.53
 7 3 -6 2.35 0.57
 7 3 -6 3.14 0.6
 -7 -3 6 3.36 0.63
 -7 -3 6 3.6 0.72
 -7 -3 6 3.03 0.61
 -7 -3 6 2.85 0.36
 -7 -3 6 2.9 0.63
 7 3 -7 1.49 0.68
 7 3 -7 1.54 0.69
 7 3 -7 2.42 0.76
 7 3 -7 1.59 0.67
 7 3 -7 1.7 0.68
 7 3 -7 2.08 0.63
 7 3 -7 1.61 0.67
 -7 -3 7 2.25 0.81
 -7 -3 7 2.65 0.74
 -7 -3 7 3.38 0.71
 -7 -3 7 2.42 0.43
 7 3 -8 -1.2 0.87
 7 3 -8 0.86 0.92
 7 3 -8 -0.06 0.67
 7 3 -8 -0.72 0.82
 7 3 -8 -1.09 0.69
 7 3 -8 -0.87 0.8
 7 3 -8 0.98 0.73
 -7 -3 8 0.28 0.52
 -7 -3 8 1.79 0.96
 -7 -3 8 -0.19 0.67
 -7 -3 8 1.53 1.03
 8 3 7 1.9 1.03
 8 3 7 1.46 0.85
 8 3 7 0.31 0.71
 -8 -3 -7 0.09 0.72
 -8 -3 -7 -0.06 0.96
 -8 -3 -7 1.59 0.71
 -8 -3 -7 0.43 0.74
 8 3 6 3.45 0.69
 8 3 6 6.18 0.96
 8 3 6 5.78 0.76
 8 3 6 3.91 0.71
 8 3 6 4.58 0.69
 -8 -3 -6 4.32 0.69
 -8 -3 -6 3.39 0.87
 -8 -3 -6 4.81 0.85
 -8 -3 -6 4.55 0.77
 -8 -3 -6 5.2 0.7
 8 3 5 4.56 0.57
 8 3 5 6.45 0.7
 8 3 5 6.85 0.85
 8 3 5 5.86 0.75
 8 3 5 7.04 0.82
 -8 -3 -5 4.49 0.82
 -8 -3 -5 6.39 0.78
 -8 -3 -5 5.65 0.64
 -8 -3 -5 6.68 0.74
 -8 -3 -5 7.36 0.9
 8 3 4 1.13 0.37
 8 3 4 0.6 0.46
 8 3 4 0.93 0.5
 8 3 4 0.87 0.45
 8 3 4 0.5 0.5
 8 3 4 1.18 0.48
 -8 -3 -4 1.22 0.46
 -8 -3 -4 0.82 0.5
 -8 -3 -4 0.75 0.48
 -8 -3 -4 0.48 0.58
 -8 -3 -4 0.47 0.47
 -8 -3 -4 1.49 0.48
 8 3 3 18.91 0.93
 8 3 3 17.36 0.88
 8 3 3 16.2 0.91
 8 3 3 18.02 0.93
 8 3 3 16.42 0.9
 8 3 3 16.54 0.62
 -8 -3 -3 15.35 0.89
 -8 -3 -3 16.66 0.82
 -8 -3 -3 18.2 0.95
 -8 -3 -3 16.54 1.14
 -8 -3 -3 15.25 0.86
 -8 -3 -3 17.11 0.9
 8 3 2 39.61 0.81
 8 3 2 40.44 1.18
 8 3 2 39.36 1.22
 8 3 2 40.78 1.2
 8 3 2 38.41 1.16
 8 3 2 41.08 1.23
 -8 -3 -2 42.89 1.52
 -8 -3 -2 40.58 1.17
 -8 -3 -2 39.65 1.24
 -8 -3 -2 39.2 1.14
 -8 -3 -2 39.09 1.18
 -8 -3 -2 42.31 1.23
 8 3 1 26.8 0.56
 8 3 1 27.94 0.96
 8 3 1 25.55 0.91
 8 3 1 28.59 0.93
 8 3 1 26.94 0.99
 8 3 1 26.06 0.99
 -8 -3 -1 27.43 1.09
 -8 -3 -1 25.56 1
 -8 -3 -1 27.81 1.01
 -8 -3 -1 26.83 0.94
 -8 -3 -1 26.25 0.94
 -8 -3 -1 27.18 0.93
 -8 -3 -1 28.01 0.95
 8 3 0 25.49 0.97
 8 3 0 24.07 0.93
 8 3 0 23.8 0.87
 8 3 0 23.67 0.83
 8 3 0 23.83 0.58
 8 3 0 23.44 0.91
 8 3 0 22.72 0.72
 -8 -3 0 23.68 0.93
 -8 -3 0 23.76 0.88
 -8 -3 0 24.21 0.86
 -8 -3 0 23.71 0.84
 -8 -3 0 23.19 0.9
 -8 -3 0 22.98 0.87
 8 3 -1 15.63 0.58
 8 3 -1 16.43 0.65
 8 3 -1 15.84 0.81
 8 3 -1 16 0.74
 8 3 -1 15.36 0.68
 8 3 -1 16.51 0.86
 -8 -3 1 16.46 0.72
 -8 -3 1 15 0.76
 -8 -3 1 15.31 0.54
 -8 -3 1 15.39 0.83
 -8 -3 1 15.73 0.72
 -8 -3 1 15.85 0.77
 8 3 -2 24.22 0.8
 8 3 -2 21.92 0.98
 8 3 -2 23.56 0.8
 8 3 -2 23.31 0.71
 8 3 -2 23.62 0.87
 -8 -3 2 24.02 0.95
 -8 -3 2 24.23 0.95
 -8 -3 2 23.69 0.8
 -8 -3 2 22.61 0.8
 -8 -3 2 22.08 0.88
 -8 -3 2 22.85 0.69
 8 3 -3 29.71 0.99
 8 3 -3 29.35 0.92
 8 3 -3 29.37 1.12
 8 3 -3 30.11 1.06
 8 3 -3 30.28 0.99
 -8 -3 3 28.23 0.92
 -8 -3 3 28.2 0.87
 -8 -3 3 29.23 0.95
 -8 -3 3 29.69 0.98
 -8 -3 3 29.76 0.94
 8 3 -4 0.3 0.44
 8 3 -4 1.07 0.38
 8 3 -4 0.8 0.44
 8 3 -4 0.92 0.43
 8 3 -4 1.32 0.49
 8 3 -4 0.52 0.43
 -8 -3 4 1.42 0.41
 -8 -3 4 1.05 0.41
 -8 -3 4 0.69 0.4
 -8 -3 4 0.48 0.41
 8 3 -5 2.6 0.64
 8 3 -5 2.8 0.55
 8 3 -5 2.89 0.57
 8 3 -5 2.31 0.32
 8 3 -5 3.02 0.55
 8 3 -5 2.87 0.39
 8 3 -5 2.82 0.52
 -8 -3 5 2.11 0.51
 -8 -3 5 2.42 0.52
 -8 -3 5 3.59 0.6
 -8 -3 5 2.03 0.54
 8 3 -6 0.09 0.56
 8 3 -6 1.46 0.61
 8 3 -6 1.55 0.46
 8 3 -6 0.77 0.67
 8 3 -6 1.55 0.57
 8 3 -6 2.18 0.6
 -8 -3 6 1.42 0.3
 -8 -3 6 1.11 0.56
 -8 -3 6 0.32 0.56
 -8 -3 6 1.22 0.64
 -8 -3 6 2.11 0.6
 8 3 -7 6.21 0.77
 8 3 -7 7.3 0.93
 8 3 -7 6.27 0.84
 8 3 -7 7.26 0.88
 8 3 -7 5.97 0.84
 8 3 -7 5.63 0.8
 8 3 -7 5.56 0.87
 -8 -3 7 6.77 1.05
 -8 -3 7 3.93 0.73
 -8 -3 7 6.92 0.88
 -8 -3 7 7.38 0.55
 -8 -3 7 7.85 0.91
 8 3 -8 3.08 0.94
 8 3 -8 2.91 1.16
 8 3 -8 0.59 0.96
 8 3 -8 0.04 0.79
 8 3 -8 2.79 0.94
 8 3 -8 1.64 0.93
 8 3 -8 0.64 0.73
 8 3 -8 2.27 0.86
 -8 -3 8 3.52 1.17
 -8 -3 8 2.41 1.01
 -8 -3 8 0.41 0.78
 -8 -3 8 2.11 0.43
 9 3 7 -0.47 1.17
 9 3 7 -0.47 0.9
 -9 -3 -7 -0.4 0.9
 -9 -3 -7 -0.04 1.18
 9 3 6 -0.42 0.63
 9 3 6 2.69 0.69
 9 3 6 2.66 0.7
 9 3 6 0.07 0.65
 9 3 6 0.48 0.81
 -9 -3 -6 1.35 0.72
 -9 -3 -6 0.54 0.67
 -9 -3 -6 -0.31 0.87
 -9 -3 -6 -0.51 0.85
 -9 -3 -6 0.3 0.59
 9 3 5 6.48 0.78
 9 3 5 9.67 0.98
 9 3 5 8.43 0.96
 9 3 5 7.54 0.89
 9 3 5 10 0.99
 9 3 5 6.02 0.7
 -9 -3 -5 7.15 0.91
 -9 -3 -5 11.04 1
 -9 -3 -5 7.55 0.98
 -9 -3 -5 5.3 0.96
 -9 -3 -5 7.65 0.94
 -9 -3 -5 7.93 0.86
 9 3 4 29.51 1.28
 9 3 4 27.51 1.21
 9 3 4 27.18 1.18
 9 3 4 27.26 0.93
 9 3 4 28.44 1.22
 9 3 4 28.31 1.18
 -9 -3 -4 27.36 1.1
 -9 -3 -4 27.76 1.22
 -9 -3 -4 28.98 1.21
 -9 -3 -4 28.43 1.61
 -9 -3 -4 29.2 1.29
 -9 -3 -4 27.7 1.28
 9 3 3 0.53 0.27
 9 3 3 1.34 0.49
 9 3 3 0.02 0.42
 9 3 3 0.34 0.5
 9 3 3 0.37 0.45
 9 3 3 0.05 0.44
 -9 -3 -3 0.59 0.43
 -9 -3 -3 0.26 0.46
 -9 -3 -3 -0.16 0.51
 -9 -3 -3 -0.23 0.48
 -9 -3 -3 0.9 0.47
 -9 -3 -3 -0.57 0.45
 9 3 2 0.84 0.43
 9 3 2 0.83 0.46
 9 3 2 0.66 0.39
 9 3 2 0.49 0.19
 9 3 2 0.37 0.44
 -9 -3 -2 0.05 0.41
 -9 -3 -2 0.46 0.43
 -9 -3 -2 0.92 0.46
 -9 -3 -2 0.56 0.5
 -9 -3 -2 -0.56 0.43
 -9 -3 -2 0.37 0.43
 9 3 1 16.63 0.88
 9 3 1 16.1 0.83
 9 3 1 16.83 0.44
 9 3 1 17.27 0.85
 9 3 1 16.64 0.83
 9 3 1 14.72 0.85
 -9 -3 -1 16.04 0.84
 -9 -3 -1 17.35 0.96
 -9 -3 -1 17.65 0.9
 -9 -3 -1 17.49 0.82
 -9 -3 -1 16.1 0.84
 -9 -3 -1 16.35 0.83
 9 3 0 0.14 0.34
 9 3 0 0.16 0.41
 9 3 0 0.12 0.21
 9 3 0 -0.09 0.27
 9 3 0 0.81 0.37
 9 3 0 -0.7 0.35
 9 3 0 -0.05 0.37
 -9 -3 0 0.11 0.39
 -9 -3 0 -0.37 0.39
 -9 -3 0 -0.01 0.32
 -9 -3 0 0.21 0.34
 -9 -3 0 0.13 0.36
 -9 -3 0 0.67 0.38
 9 3 -1 0.62 0.37
 9 3 -1 0.05 0.4
 9 3 -1 0.26 0.34
 9 3 -1 0.09 0.26
 9 3 -1 0.36 0.37
 9 3 -1 0.15 0.41
 -9 -3 1 0.38 0.35
 -9 -3 1 0.59 0.41
 -9 -3 1 0.31 0.22
 -9 -3 1 0.66 0.4
 -9 -3 1 0.2 0.38
 -9 -3 1 0.02 0.37
 -9 -3 1 0.07 0.35
 9 3 -2 5.2 0.52
 9 3 -2 4.76 0.58
 9 3 -2 4.27 0.59
 9 3 -2 5.18 0.59
 9 3 -2 5.19 0.51
 -9 -3 2 4.73 0.51
 -9 -3 2 5.48 0.57
 -9 -3 2 5.84 0.67
 -9 -3 2 5.42 0.59
 -9 -3 2 5.28 0.62
 9 3 -3 15.82 0.95
 9 3 -3 16.34 0.9
 9 3 -3 14.6 0.83
 9 3 -3 15.16 0.77
 9 3 -3 15.16 0.84
 -9 -3 3 14.77 0.67
 -9 -3 3 15.23 0.85
 -9 -3 3 15.04 0.76
 -9 -3 3 15.89 0.87
 -9 -3 3 14.62 0.78
 9 3 -4 15.19 0.85
 9 3 -4 16.62 1.04
 9 3 -4 14.42 0.87
 9 3 -4 13.62 0.9
 9 3 -4 15.91 0.98
 9 3 -4 16.01 1
 -9 -3 4 14.91 0.86
 -9 -3 4 15.92 0.87
 -9 -3 4 15.84 0.94
 -9 -3 4 13.97 0.87
 9 3 -5 2.06 0.56
 9 3 -5 3.33 0.69
 9 3 -5 1.85 0.68
 9 3 -5 2.48 0.61
 9 3 -5 2.28 0.46
 9 3 -5 2.65 0.58
 9 3 -5 2.19 0.61
 -9 -3 5 2.32 0.6
 -9 -3 5 3.33 0.62
 -9 -3 5 2.44 0.59
 -9 -3 5 2.67 0.58
 9 3 -6 14.34 1.21
 9 3 -6 16.62 1.22
 9 3 -6 14.53 0.72
 9 3 -6 13.67 1.08
 9 3 -6 16.06 0.97
 9 3 -6 16.3 1.14
 9 3 -6 14.14 1.3
 -9 -3 6 14.79 1.14
 -9 -3 6 14.45 1.17
 -9 -3 6 12.93 1.15
 -9 -3 6 14.93 1.1
 -9 -3 6 14.79 1.1
 9 3 -7 2.86 0.9
 9 3 -7 3.28 0.85
 9 3 -7 1.95 0.57
 9 3 -7 3.6 0.71
 9 3 -7 2.09 0.87
 9 3 -7 1.9 0.77
 9 3 -7 2.59 0.84
 -9 -3 7 1.12 0.71
 -9 -3 7 1.56 0.83
 -9 -3 7 2.9 0.89
 -9 -3 7 2.62 0.86
 -9 -3 7 3.01 0.83
 9 3 -8 -0.04 1.01
 9 3 -8 1.36 1.21
 9 3 -8 0.87 0.98
 9 3 -8 0.26 1.02
 9 3 -8 0.06 0.85
 9 3 -8 0.06 0.95
 -9 -3 8 -0.89 0.78
 -9 -3 8 1.83 1.05
 -9 -3 8 1.66 1.13
 10 3 6 5.44 0.86
 10 3 6 5.64 0.91
 10 3 6 6.04 0.84
 10 3 6 5.11 0.81
 10 3 6 6.53 1.18
 -10 -3 -6 4.85 0.86
 -10 -3 -6 5.93 0.89
 -10 -3 -6 5.26 0.81
 -10 -3 -6 5.63 1.16
 10 3 5 2.15 0.66
 10 3 5 4.74 0.78
 10 3 5 3.8 0.77
 10 3 5 3.53 0.59
 10 3 5 5.6 0.8
 10 3 5 1.79 0.79
 -10 -3 -5 4.28 0.76
 -10 -3 -5 3.42 0.72
 -10 -3 -5 4.23 0.96
 -10 -3 -5 3.01 0.7
 -10 -3 -5 3.66 0.7
 -10 -3 -5 1.79 0.95
 10 3 4 6.64 0.76
 10 3 4 6.36 0.78
 10 3 4 5.59 0.73
 10 3 4 6.25 0.74
 10 3 4 5.05 0.78
 10 3 4 6.09 0.68
 -10 -3 -4 7.04 0.78
 -10 -3 -4 6.25 0.76
 -10 -3 -4 4.24 0.74
 -10 -3 -4 3.75 0.9
 -10 -3 -4 5.72 0.69
 -10 -3 -4 5.06 0.79
 10 3 3 0.32 0.49
 10 3 3 0.07 0.27
 10 3 3 0.01 0.47
 10 3 3 0.24 0.52
 10 3 3 0.06 0.47
 -10 -3 -3 -0.49 0.62
 -10 -3 -3 -0.23 0.43
 -10 -3 -3 0.19 0.48
 -10 -3 -3 -0.27 0.5
 -10 -3 -3 1.59 0.54
 -10 -3 -3 -0.11 0.49
 10 3 2 2.42 0.57
 10 3 2 2.22 0.23
 10 3 2 2.21 0.54
 10 3 2 2.05 0.56
 10 3 2 2.34 0.47
 -10 -3 -2 2.33 0.53
 -10 -3 -2 2.74 0.54
 -10 -3 -2 1.7 0.53
 -10 -3 -2 2.21 0.58
 -10 -3 -2 1.44 0.62
 10 3 1 1.38 0.51
 10 3 1 1.58 0.53
 10 3 1 1.35 0.48
 10 3 1 1.49 0.5
 10 3 1 2.13 0.47
 10 3 1 1.7 0.21
 10 3 1 1.81 0.42
 10 3 1 1.63 0.22
 -10 -3 -1 1 0.5
 -10 -3 -1 0.77 0.43
 -10 -3 -1 1.55 0.48
 -10 -3 -1 1.03 0.48
 -10 -3 -1 1.92 0.49
 -10 -3 -1 1.51 0.48
 10 3 0 45.84 1.36
 10 3 0 47.55 1.32
 10 3 0 48.69 1.43
 10 3 0 46.01 1.12
 10 3 0 48.23 1.37
 10 3 0 47.2 0.99
 10 3 0 45.61 1.41
 -10 -3 0 49 1.35
 -10 -3 0 48.67 1.41
 -10 -3 0 47.39 1.43
 -10 -3 0 49.29 1.44
 -10 -3 0 51.82 1.38
 -10 -3 0 47.25 1.36
 10 3 -1 0.4 0.29
 10 3 -1 0.21 0.42
 10 3 -1 -0.09 0.45
 10 3 -1 -0.35 0.37
 10 3 -1 0.23 0.42
 10 3 -1 0.17 0.39
 -10 -3 1 -0.5 0.38
 -10 -3 1 -0.04 0.25
 -10 -3 1 0.13 0.39
 -10 -3 1 -0.03 0.38
 -10 -3 1 0.01 0.41
 -10 -3 1 0.34 0.45
 -10 -3 1 0.54 0.4
 10 3 -2 30.74 1.22
 10 3 -2 29.75 0.98
 10 3 -2 30.04 1.04
 10 3 -2 29.45 1.09
 10 3 -2 31.18 0.93
 10 3 -2 27.88 1.17
 10 3 -2 29.84 1.09
 -10 -3 2 30.81 1.15
 -10 -3 2 30.5 1.13
 -10 -3 2 29.88 1.06
 -10 -3 2 28.37 1.1
 -10 -3 2 30.15 1.07
 10 3 -3 1.37 0.51
 10 3 -3 1.06 0.49
 10 3 -3 0.48 0.43
 10 3 -3 0.8 0.34
 10 3 -3 -0.09 0.5
 10 3 -3 1.04 0.48
 10 3 -3 0.72 0.48
 -10 -3 3 1.03 0.45
 -10 -3 3 0.52 0.44
 -10 -3 3 0.68 0.46
 -10 -3 3 0.55 0.34
 -10 -3 3 0.54 0.44
 10 3 -4 25.16 1.13
 10 3 -4 24.18 1.09
 10 3 -4 26.42 1.25
 10 3 -4 23.35 1.03
 10 3 -4 24.67 1.24
 10 3 -4 24.98 1.17
 -10 -3 4 24.99 1.06
 -10 -3 4 24.23 1.03
 -10 -3 4 24.3 0.91
 -10 -3 4 23.49 1.05
 -10 -3 4 24.42 1.12
 -10 -3 4 24.94 1.15
 10 3 -5 0.4 0.63
 10 3 -5 -0.03 0.66
 10 3 -5 -0.12 0.55
 10 3 -5 0.52 0.57
 10 3 -5 -0.44 0.51
 10 3 -5 0.05 0.47
 10 3 -5 0.7 0.62
 -10 -3 5 0.98 0.58
 -10 -3 5 0.46 0.55
 -10 -3 5 0.93 0.6
 10 3 -6 0.47 0.69
 10 3 -6 -0.83 0.55
 10 3 -6 -0.14 0.69
 10 3 -6 -0.98 0.78
 10 3 -6 0.42 0.69
 10 3 -6 -0.07 0.64
 -10 -3 6 -0.81 0.62
 -10 -3 6 0.03 0.65
 -10 -3 6 0.7 0.69
 10 3 -7 4.38 1.04
 10 3 -7 4.25 0.91
 10 3 -7 4.69 0.99
 10 3 -7 3.77 0.93
 10 3 -7 4.37 1.04
 10 3 -7 3.38 0.78
 -10 -3 7 4.36 0.93
 -10 -3 7 3.79 0.94
 -10 -3 7 4.02 0.91
 -10 -3 7 3.4 1.08
 10 3 -8 1.58 1.22
 10 3 -8 1.96 1.19
 10 3 -8 1.75 1.12
 10 3 -8 3.73 1.38
 10 3 -8 2.98 1.16
 -10 -3 8 2.36 1.23
 -10 -3 8 0.2 1.1
 -10 -3 8 2.64 1.19
 11 3 6 2.62 1.19
 -11 -3 -6 2.73 1.19
 11 3 5 1.54 0.8
 11 3 5 0.4 0.68
 11 3 5 -0.07 0.79
 11 3 5 -0.05 0.52
 11 3 5 0.25 0.68
 11 3 5 0.83 0.92
 -11 -3 -5 -0.74 0.65
 -11 -3 -5 0.15 0.76
 -11 -3 -5 1.09 0.94
 -11 -3 -5 -1.66 0.95
 -11 -3 -5 -1.15 0.7
 11 3 4 1.05 0.72
 11 3 4 0.56 0.68
 11 3 4 1.64 0.42
 11 3 4 1.19 0.7
 11 3 4 1.93 0.6
 -11 -3 -4 2.19 0.77
 -11 -3 -4 1.91 0.69
 -11 -3 -4 1.04 0.86
 -11 -3 -4 1 0.63
 -11 -3 -4 0.9 0.75
 11 3 3 3.05 0.72
 11 3 3 3.57 0.65
 11 3 3 3.47 0.71
 11 3 3 2.39 0.32
 11 3 3 3.74 0.74
 -11 -3 -3 2.97 0.67
 -11 -3 -3 2.35 0.69
 -11 -3 -3 1.87 0.78
 -11 -3 -3 2.58 0.69
 -11 -3 -3 2.95 0.58
 11 3 2 20.65 0.54
 11 3 2 22.11 1.19
 11 3 2 21.87 1.08
 11 3 2 23.04 1.17
 11 3 2 22.39 1.19
 -11 -3 -2 21.55 1.08
 -11 -3 -2 21.84 1.41
 -11 -3 -2 22.72 1.12
 -11 -3 -2 23.28 1.18
 -11 -3 -2 20.27 1.15
 -11 -3 -2 20.53 1.11
 11 3 1 -0.07 0.47
 11 3 1 0.4 0.52
 11 3 1 0.07 0.21
 11 3 1 0.27 0.19
 11 3 1 1.33 0.55
 11 3 1 0.72 0.57
 11 3 1 0.4 0.41
 11 3 1 0.61 0.42
 -11 -3 -1 -0.24 0.52
 -11 -3 -1 -0.37 0.43
 -11 -3 -1 -0.3 0.46
 -11 -3 -1 0.36 0.53
 -11 -3 -1 0.51 0.49
 -11 -3 -1 -0.46 0.47
 11 3 0 11.32 0.91
 11 3 0 11.68 0.55
 11 3 0 11.67 0.84
 11 3 0 10.21 0.85
 11 3 0 13.6 0.89
 11 3 0 11.33 0.93
 11 3 0 11.01 0.59
 -11 -3 0 10.06 0.91
 -11 -3 0 9.07 0.89
 -11 -3 0 11.44 0.87
 -11 -3 0 12.49 0.9
 -11 -3 0 11.03 0.87
 -11 -3 0 10.77 0.89
 11 3 -1 3.25 0.51
 11 3 -1 3.57 0.61
 11 3 -1 2.81 0.61
 11 3 -1 3.27 0.54
 11 3 -1 3 0.58
 11 3 -1 2.95 0.4
 -11 -3 1 2.6 0.53
 -11 -3 1 2.29 0.53
 -11 -3 1 2.87 0.35
 -11 -3 1 2.65 0.57
 -11 -3 1 3.34 0.64
 -11 -3 1 3.33 0.57
 -11 -3 1 2.02 0.52
 11 3 -2 2.8 0.53
 11 3 -2 2.66 0.46
 11 3 -2 2.49 0.57
 11 3 -2 5.15 0.68
 11 3 -2 2.96 0.48
 11 3 -2 3.57 0.65
 -11 -3 2 3.18 0.58
 -11 -3 2 3.01 0.57
 -11 -3 2 3.05 0.62
 -11 -3 2 2.06 0.6
 -11 -3 2 2.98 0.58
 11 3 -3 38.87 1.4
 11 3 -3 37.2 1.28
 11 3 -3 37.51 1.39
 11 3 -3 36.71 1.42
 11 3 -3 37.58 1.26
 11 3 -3 37.39 1.03
 11 3 -3 38.85 1.46
 -11 -3 3 39.13 1.27
 -11 -3 3 36.72 1.34
 -11 -3 3 36.33 1.25
 -11 -3 3 38.18 1.4
 11 3 -4 7.42 0.78
 11 3 -4 8.51 1.05
 11 3 -4 7.68 0.92
 11 3 -4 7.59 0.99
 11 3 -4 7.3 0.87
 11 3 -4 8.38 0.92
 -11 -3 4 7.91 0.8
 -11 -3 4 7.18 0.81
 -11 -3 4 8.53 0.69
 -11 -3 4 8.05 0.88
 -11 -3 4 9.02 0.92
 -11 -3 4 7.46 0.76
 11 3 -5 0.62 0.8
 11 3 -5 0.47 0.6
 11 3 -5 0.6 0.71
 11 3 -5 0.32 0.69
 11 3 -5 0.25 0.56
 11 3 -5 1.86 0.63
 -11 -3 5 0.26 0.63
 -11 -3 5 0.74 0.53
 -11 -3 5 0.19 0.54
 -11 -3 5 0.95 0.64
 -11 -3 5 0.7 0.61
 11 3 -6 0.73 0.78
 11 3 -6 -0.23 0.93
 11 3 -6 -0.31 0.52
 11 3 -6 0.28 0.76
 11 3 -6 0.98 0.78
 11 3 -6 0.77 0.66
 11 3 -6 -0.06 0.77
 -11 -3 6 0.49 0.76
 -11 -3 6 -0.32 0.73
 -11 -3 6 -0.69 0.71
 11 3 -7 1.53 1.02
 11 3 -7 1.19 0.77
 11 3 -7 2 1.02
 11 3 -7 1.91 1.13
 11 3 -7 2.88 1.06
 11 3 -7 1.95 0.98
 -11 -3 7 2.21 1.02
 -11 -3 7 3.58 0.96
 -11 -3 7 2.46 1.12
 -11 -3 7 2.6 0.96
 12 3 5 1.71 0.97
 12 3 5 0.31 0.87
 12 3 5 -0.26 0.99
 12 3 5 0.14 0.56
 -12 -3 -5 1.32 1.05
 -12 -3 -5 -0.66 0.82
 -12 -3 -5 -0.97 1.2
 -12 -3 -5 0.62 0.94
 -12 -3 -5 1.13 0.97
 12 3 4 11.34 1.21
 12 3 4 13.27 1.42
 12 3 4 13.16 0.73
 12 3 4 12.92 1.24
 12 3 4 14.77 1.25
 -12 -3 -4 13.72 1.27
 -12 -3 -4 10.87 1.13
 -12 -3 -4 14.62 1.22
 -12 -3 -4 9.12 1.27
 -12 -3 -4 12.52 1.22
 12 3 3 2.26 0.28
 12 3 3 2.19 0.59
 12 3 3 2.71 0.76
 12 3 3 2.58 0.75
 12 3 3 2.4 0.71
 -12 -3 -3 3.15 0.8
 -12 -3 -3 1.39 0.66
 -12 -3 -3 1.38 0.88
 -12 -3 -3 2 0.61
 -12 -3 -3 2.9 0.78
 12 3 2 2.52 0.68
 12 3 2 2.12 0.68
 12 3 2 1.39 0.7
 12 3 2 1.27 0.54
 -12 -3 -2 0.86 0.62
 -12 -3 -2 0.62 0.68
 -12 -3 -2 1.35 0.64
 -12 -3 -2 1.82 0.72
 -12 -3 -2 1.94 0.66
 -12 -3 -2 1.02 0.66
 12 3 1 0.17 0.45
 12 3 1 0.24 0.63
 12 3 1 0.05 0.43
 12 3 1 -0.5 0.52
 12 3 1 0.38 0.59
 12 3 1 -0.08 0.22
 12 3 1 -0.07 0.19
 12 3 1 -0.45 0.56
 -12 -3 -1 -0.56 0.57
 -12 -3 -1 -0.35 0.55
 -12 -3 -1 -0.13 0.5
 -12 -3 -1 -0.1 0.57
 -12 -3 -1 0.44 0.55
 -12 -3 -1 0.32 0.6
 12 3 0 10.33 0.57
 12 3 0 9.97 0.98
 12 3 0 8.15 0.92
 12 3 0 9.19 0.89
 12 3 0 9.44 0.97
 12 3 0 9.25 0.59
 12 3 0 9.08 0.98
 -12 -3 0 11.89 0.98
 -12 -3 0 9.15 0.99
 -12 -3 0 9.29 0.94
 -12 -3 0 8.62 0.92
 -12 -3 0 8.11 0.9
 -12 -3 0 11.11 0.95
 12 3 -1 0.52 0.55
 12 3 -1 -0.42 0.52
 12 3 -1 -0.02 0.51
 12 3 -1 0.38 0.52
 12 3 -1 -0.3 0.54
 12 3 -1 0.39 0.36
 -12 -3 1 -0.16 0.46
 -12 -3 1 -0.34 0.59
 -12 -3 1 -0.31 0.5
 -12 -3 1 -0.08 0.54
 -12 -3 1 1.04 0.56
 -12 -3 1 0.4 0.47
 -12 -3 1 0.08 0.32
 12 3 -2 8.74 0.93
 12 3 -2 8.51 0.8
 12 3 -2 7.49 0.79
 12 3 -2 8.95 0.82
 12 3 -2 8.39 0.89
 12 3 -2 6.67 0.85
 -12 -3 2 8.43 0.8
 -12 -3 2 8.8 0.9
 -12 -3 2 7.71 0.83
 -12 -3 2 8.76 0.93
 12 3 -3 2.62 0.49
 12 3 -3 2.47 0.64
 12 3 -3 2.62 0.62
 12 3 -3 1.71 0.62
 12 3 -3 2.56 0.7
 12 3 -3 2.8 0.67
 12 3 -3 1.3 0.68
 -12 -3 3 2.68 0.66
 -12 -3 3 2.08 0.61
 -12 -3 3 3.02 0.66
 -12 -3 3 3.05 0.62
 12 3 -4 0.78 0.61
 12 3 -4 1.02 0.64
 12 3 -4 -0.05 0.66
 12 3 -4 -1.47 0.56
 12 3 -4 -0.84 0.59
 12 3 -4 0.1 0.64
 -12 -3 4 -0.18 0.4
 -12 -3 4 0.72 0.62
 -12 -3 4 -0.31 0.6
 -12 -3 4 0.37 0.56
 -12 -3 4 0.12 0.53
 -12 -3 4 -0.27 0.65
 12 3 -5 3.15 0.75
 12 3 -5 4.6 0.79
 12 3 -5 2.56 0.93
 12 3 -5 4.46 0.77
 12 3 -5 3.33 0.9
 12 3 -5 3.38 0.77
 -12 -3 5 3.28 0.82
 -12 -3 5 4.28 0.86
 -12 -3 5 3.45 0.62
 -12 -3 5 1.8 0.71
 -12 -3 5 3.29 0.72
 12 3 -6 14.43 1.63
 12 3 -6 16.96 1.29
 12 3 -6 14.74 1.74
 12 3 -6 18.04 1.37
 12 3 -6 14.34 1.16
 12 3 -6 17.34 1.45
 -12 -3 6 14.4 1.26
 -12 -3 6 15.93 1.38
 -12 -3 6 14.91 1.47
 -12 -3 6 17.94 1.5
 12 3 -7 0.94 1.2
 12 3 -7 2.19 1.19
 12 3 -7 2.42 1.11
 -12 -3 7 2.78 1.09
 -12 -3 7 0.99 1.07
 -12 -3 7 1.96 1.11
 13 3 4 1.11 0.94
 13 3 4 1.92 1.03
 13 3 4 2.19 0.99
 13 3 4 2.83 0.86
 -13 -3 -4 2.46 1.09
 -13 -3 -4 -0.86 1.1
 -13 -3 -4 2.23 0.97
 -13 -3 -4 0.11 0.78
 -13 -3 -4 3.53 0.98
 13 3 3 1.28 0.85
 13 3 3 2.79 0.9
 13 3 3 1.22 0.88
 13 3 3 2.66 0.69
 -13 -3 -3 2.96 0.81
 -13 -3 -3 0.04 0.91
 -13 -3 -3 2.17 0.88
 -13 -3 -3 2.04 0.9
 -13 -3 -3 2.64 0.66
 -13 -3 -3 1.34 0.88
 13 3 2 4.05 0.69
 13 3 2 4.23 0.85
 13 3 2 4.61 0.72
 13 3 2 3.75 0.84
 13 3 2 3.84 0.85
 -13 -3 -2 1.67 0.78
 -13 -3 -2 2.86 0.88
 -13 -3 -2 3.1 0.81
 -13 -3 -2 4.66 0.85
 -13 -3 -2 2.81 0.84
 -13 -3 -2 2.25 0.64
 13 3 1 4.29 0.81
 13 3 1 3.22 0.76
 13 3 1 4 0.65
 13 3 1 4.51 0.81
 13 3 1 3.59 0.55
 13 3 1 3.53 0.77
 -13 -3 -1 4.55 0.67
 -13 -3 -1 3.24 0.78
 -13 -3 -1 3.05 0.74
 -13 -3 -1 3.73 0.74
 -13 -3 -1 2.75 0.73
 -13 -3 -1 3.59 0.81
 13 3 0 11.71 1.12
 13 3 0 10.25 1.08
 13 3 0 13.57 0.64
 13 3 0 12.7 1.18
 13 3 0 12.86 1.19
 -13 -3 0 14.14 1.07
 -13 -3 0 12.22 1.11
 -13 -3 0 12.01 1
 -13 -3 0 13.39 1.04
 -13 -3 0 14.59 1.16
 -13 -3 0 13.2 1.13
 13 3 -1 9.85 1.13
 13 3 -1 9.39 0.98
 13 3 -1 9.18 1.05
 13 3 -1 10.86 1.11
 13 3 -1 9.16 0.95
 13 3 -1 9.58 0.75
 -13 -3 1 9.46 0.94
 -13 -3 1 8.93 0.9
 -13 -3 1 9.71 1.13
 -13 -3 1 9.1 0.68
 -13 -3 1 10.16 1.06
 -13 -3 1 9.92 0.99
 -13 -3 1 9.86 1.08
 13 3 -2 16.91 0.99
 13 3 -2 15.59 0.99
 13 3 -2 18.07 1.2
 13 3 -2 15.42 1.24
 13 3 -2 15.64 1.15
 13 3 -2 15.96 1.11
 -13 -3 2 13.65 1.09
 -13 -3 2 14.85 1.22
 -13 -3 2 13.99 1
 -13 -3 2 16.64 1.01
 -13 -3 2 15.63 1.18
 13 3 -3 -0.43 0.59
 13 3 -3 0.75 0.76
 13 3 -3 0.19 0.73
 13 3 -3 1.21 0.64
 13 3 -3 0.55 0.63
 13 3 -3 0.05 0.52
 13 3 -3 0.78 0.65
 -13 -3 3 1.4 0.72
 -13 -3 3 0.88 0.69
 -13 -3 3 1.78 0.61
 -13 -3 3 1.44 0.69
 13 3 -4 9.79 1.18
 13 3 -4 12.55 1.34
 13 3 -4 11.93 1.08
 13 3 -4 10.26 1.09
 13 3 -4 10.12 0.97
 13 3 -4 10.87 1.3
 -13 -3 4 11.25 1.02
 -13 -3 4 9.92 1.05
 -13 -3 4 10.29 1.24
 -13 -3 4 10.12 0.96
 -13 -3 4 9.03 0.93
 13 3 -5 2.72 1.01
 13 3 -5 2.22 0.81
 13 3 -5 4.18 0.98
 13 3 -5 4.59 0.91
 13 3 -5 4.46 0.88
 13 3 -5 5.47 0.99
 -13 -3 5 4.69 0.63
 -13 -3 5 4.58 0.94
 -13 -3 5 3.55 0.89
 -13 -3 5 4.97 0.74
 -13 -3 5 2.71 0.86
 13 3 -6 0.54 0.95
 13 3 -6 -0.98 1.12
 13 3 -6 1.51 0.9
 13 3 -6 0.23 1.04
 13 3 -6 0.08 0.77
 -13 -3 6 -0.9 0.72
 -13 -3 6 -0.34 0.95
 -13 -3 6 -1.12 0.98
 -13 -3 6 -0.52 0.88
 14 3 3 2.69 1.09
 14 3 3 4.43 1.11
 14 3 3 2.75 0.86
 14 3 3 2.72 0.97
 -14 -3 -3 3.4 0.99
 -14 -3 -3 2 0.77
 -14 -3 -3 1.33 1.02
 -14 -3 -3 1.69 1.15
 -14 -3 -3 2.06 0.95
 -14 -3 -3 2.54 0.99
 14 3 2 18.48 1.51
 14 3 2 18.22 1.61
 14 3 2 14.54 1.23
 14 3 2 17.79 1.55
 14 3 2 19.34 1.19
 -14 -3 -2 15.91 1.51
 -14 -3 -2 17.13 1.82
 -14 -3 -2 17.09 1.55
 -14 -3 -2 15.93 1.39
 -14 -3 -2 15.14 1.26
 -14 -3 -2 21.1 1.58
 14 3 1 9.21 1.06
 14 3 1 6.66 0.92
 14 3 1 6.79 0.63
 14 3 1 6.1 0.78
 14 3 1 9.94 1.27
 14 3 1 8.29 1.02
 -14 -3 -1 8.73 1.07
 -14 -3 -1 6.71 0.82
 -14 -3 -1 6.7 0.98
 -14 -3 -1 6.37 0.94
 -14 -3 -1 7.94 0.94
 -14 -3 -1 6.73 0.98
 14 3 0 8.25 0.96
 14 3 0 8.73 1.07
 14 3 0 8.87 0.61
 14 3 0 8.23 0.95
 14 3 0 9.81 1.26
 -14 -3 0 10.03 1.02
 -14 -3 0 9.22 0.94
 -14 -3 0 10.28 1.12
 -14 -3 0 9.53 1.03
 -14 -3 0 10.27 1.22
 -14 -3 0 10.72 1.21
 14 3 -1 5.5 0.81
 14 3 -1 5.83 0.87
 14 3 -1 5.08 0.82
 14 3 -1 4.85 0.86
 14 3 -1 6.25 0.94
 14 3 -1 5.24 0.56
 -14 -3 1 7.11 0.89
 -14 -3 1 6.53 0.78
 -14 -3 1 5.97 0.88
 -14 -3 1 5.88 0.93
 -14 -3 1 5.77 0.82
 -14 -3 1 6.04 0.87
 -14 -3 1 5.41 0.66
 14 3 -2 4.05 0.72
 14 3 -2 3.69 0.89
 14 3 -2 4.49 0.8
 14 3 -2 2.86 0.9
 14 3 -2 4.32 0.8
 14 3 -2 4.18 0.65
 14 3 -2 2.35 0.72
 -14 -3 2 2.8 0.86
 -14 -3 2 4.48 0.71
 -14 -3 2 4.24 0.86
 -14 -3 2 3.1 0.82
 -14 -3 2 4.25 0.76
 14 3 -3 6.74 0.92
 14 3 -3 6.61 0.72
 14 3 -3 4.67 0.81
 14 3 -3 6.04 0.88
 14 3 -3 6.24 1.02
 14 3 -3 5.86 0.81
 -14 -3 3 7.25 0.91
 -14 -3 3 6.66 0.94
 -14 -3 3 8.19 0.97
 -14 -3 3 6.3 0.82
 14 3 -4 -0.1 0.78
 14 3 -4 0.65 0.93
 14 3 -4 0.45 0.84
 14 3 -4 -0.76 0.82
 14 3 -4 0.34 0.93
 14 3 -4 -0.17 0.79
 -14 -3 4 0.27 0.89
 -14 -3 4 0.82 0.89
 -14 -3 4 0.73 0.65
 -14 -3 4 -0.18 0.83
 -14 -3 4 -1.35 0.76
 14 3 -5 2.99 1.07
 14 3 -5 1.92 1.02
 14 3 -5 3.7 0.98
 14 3 -5 3.37 0.93
 14 3 -5 0.47 1.08
 14 3 -5 3.38 1.02
 -14 -3 5 1.95 0.97
 -14 -3 5 3.21 1.03
 -14 -3 5 2.21 0.93
 -14 -3 5 4.16 0.82
 15 3 2 2.39 1.1
 15 3 2 1.14 0.76
 15 3 2 1.35 1.07
 15 3 2 1.86 1.09
 -15 -3 -2 1.75 1.11
 -15 -3 -2 1.04 0.77
 -15 -3 -2 2.71 1.04
 -15 -3 -2 3.31 1.16
 -15 -3 -2 0.32 1.12
 -15 -3 -2 1.24 1.03
 15 3 1 2.9 0.99
 15 3 1 0.43 0.73
 15 3 1 2 0.97
 15 3 1 1.7 0.51
 15 3 1 2.97 0.99
 -15 -3 -1 2.9 1.02
 -15 -3 -1 2.46 0.93
 -15 -3 -1 2.35 0.92
 -15 -3 -1 1.61 0.99
 -15 -3 -1 2.44 0.95
 -15 -3 -1 2.02 0.79
 15 3 0 0.1 0.85
 15 3 0 0.21 0.86
 15 3 0 -1.64 0.71
 15 3 0 -0.08 0.31
 15 3 0 0.16 0.29
 15 3 0 0.73 0.93
 -15 -3 0 -0.65 0.69
 -15 -3 0 1.36 0.68
 -15 -3 0 0.29 0.68
 -15 -3 0 -0.36 0.84
 -15 -3 0 -0.41 0.87
 -15 -3 0 1.14 0.89
 15 3 -1 3.11 0.56
 15 3 -1 3.49 0.9
 15 3 -1 2.65 0.84
 15 3 -1 4.19 1.12
 15 3 -1 3.2 0.86
 15 3 -1 4.55 0.93
 -15 -3 1 3.75 1.07
 -15 -3 1 4.31 0.93
 -15 -3 1 3.45 0.74
 -15 -3 1 3.85 0.92
 -15 -3 1 3.48 0.96
 -15 -3 1 3.32 0.73
 15 3 -2 2.01 1.04
 15 3 -2 3.61 0.92
 15 3 -2 3.2 0.83
 15 3 -2 4.76 1.08
 15 3 -2 3.32 0.7
 15 3 -2 4.22 0.81
 -15 -3 2 2.73 0.99
 -15 -3 2 3.54 0.97
 -15 -3 2 3.43 0.9
 -15 -3 2 3.13 0.76
 -15 -3 2 4.25 0.79
 15 3 -3 6.39 1.01
 15 3 -3 6.65 0.94
 15 3 -3 5.06 0.79
 15 3 -3 4.92 0.99
 15 3 -3 4.79 0.92
 15 3 -3 4.01 1.09
 -15 -3 3 7.37 1.14
 -15 -3 3 5.88 1.07
 -15 -3 3 4.7 0.76
 -15 -3 3 5.18 0.99
 -15 -3 3 5.8 0.89
 15 3 -4 6.45 1.01
 15 3 -4 6.05 1.11
 15 3 -4 8.16 1.11
 15 3 -4 8.96 1.28
 15 3 -4 9.14 1.14
 -15 -3 4 8.84 1.19
 -15 -3 4 7.39 1.24
 -15 -3 4 6.75 1.1
 -15 -3 4 7.43 1.12
 15 3 -5 0.69 1.06
 16 3 1 -0.82 1.1
 16 3 1 0.03 1.09
 -16 -3 -1 0.12 1.1
 -16 -3 -1 -0.21 1.11
 -16 -3 -1 -0.23 1.01
 -16 -3 -1 0.23 1.17
 16 3 0 1.51 1.14
 16 3 0 1.37 1.07
 16 3 0 1.04 1.14
 16 3 0 2.77 1.11
 16 3 0 1.57 1.06
 -16 -3 0 1.34 1.11
 -16 -3 0 0.78 1.07
 -16 -3 0 0.32 1.06
 -16 -3 0 0.82 1.13
 16 3 -1 1.16 1.06
 16 3 -1 0.1 1.08
 16 3 -1 1.06 0.98
 16 3 -1 1.44 0.92
 16 3 -1 1.61 1.11
 -16 -3 1 2.37 1.07
 -16 -3 1 0.62 1.09
 -16 -3 1 1.28 1.01
 16 3 -2 7.9 1.43
 16 3 -2 10.31 1.34
 16 3 -2 11.75 1.24
 16 3 -2 10.91 1.25
 16 3 -2 12.25 1.41
 -16 -3 2 11.06 1.27
 -16 -3 2 10.29 1.32
 -16 -3 2 10.7 1.29
 16 3 -3 1.04 0.86
 16 3 -3 1.02 0.93
 16 3 -3 1.19 1.19
 16 3 -3 1.85 1.07
 -16 -3 3 -1.2 1.03
 -16 -3 3 2.38 1.13
 -16 -3 3 2.91 1.17
 -16 4 3 0.26 1.11
 -16 4 3 -1.31 1.18
 -16 4 3 -0.6 1.06
 -16 4 3 2.54 1.18
 16 -4 -3 -0.86 1.16
 16 -4 -3 0.83 1.09
 16 -4 -3 -0.48 1.04
 -16 4 2 0.63 1.09
 -16 4 2 0.88 1.03
 -16 4 2 -1.93 0.88
 -16 4 2 1.53 1.05
 -16 4 2 1.01 1.07
 16 -4 -2 -0.83 1.11
 16 -4 -2 -1.63 0.9
 16 -4 -2 -1.03 0.96
 16 -4 -2 0.18 0.78
 -16 4 1 0.5 1.03
 -16 4 1 -1.7 0.94
 -16 4 1 -0.78 1
 -16 4 1 0.04 0.93
 -16 4 1 1.12 1.06
 16 -4 -1 1.17 1.08
 16 -4 -1 0.4 0.88
 16 -4 -1 0.57 1.07
 16 -4 -1 1.3 1.06
 -16 4 0 1.58 0.98
 -16 4 0 1.77 1.07
 -16 4 0 1.43 1.19
 -16 4 0 1.97 1.08
 -16 4 0 1.24 1.07
 -16 4 0 2.28 0.98
 16 -4 0 0.74 0.86
 16 -4 0 -0.01 1.11
 16 -4 0 3.6 1.08
 16 -4 0 1.34 1.06
 -16 4 -1 0.05 1.14
 -16 4 -1 0.29 1.14
 16 -4 1 1.01 1.14
 16 -4 1 0.53 1.09
 -15 4 4 10.23 1.28
 -15 4 4 8.38 1.29
 -15 4 4 7.77 1.18
 15 -4 -4 7.54 1.18
 15 -4 -4 8.43 1.25
 15 -4 -4 6.43 1.16
 15 -4 -4 8.76 1.26
 -15 4 3 4.58 1.08
 -15 4 3 2.35 0.95
 -15 4 3 3.93 1
 -15 4 3 3.27 1.02
 15 -4 -3 3.33 1.01
 15 -4 -3 3.37 1.02
 15 -4 -3 2.56 0.55
 15 -4 -3 2.38 1.02
 -15 4 2 0.69 0.86
 -15 4 2 -0.99 0.89
 -15 4 2 -0.47 0.86
 -15 4 2 1.56 0.88
 15 -4 -2 -0.83 0.89
 15 -4 -2 -0.93 0.78
 15 -4 -2 0.4 0.87
 -15 4 1 4.33 0.95
 -15 4 1 6.09 0.95
 -15 4 1 6.03 1.01
 -15 4 1 4.68 1.01
 -15 4 1 5.77 0.99
 15 -4 -1 6.16 1.04
 15 -4 -1 4.26 0.86
 15 -4 -1 4.91 1.06
 15 -4 -1 6.91 1
 -15 4 0 16.38 1.55
 -15 4 0 15.97 1.48
 -15 4 0 12.8 1.42
 -15 4 0 16.02 1.51
 -15 4 0 15.38 1.43
 15 -4 0 16.98 1.52
 15 -4 0 15.37 1.3
 15 -4 0 14.43 1.49
 15 -4 0 14.3 1.41
 -15 4 -1 3.87 0.89
 -15 4 -1 2.93 0.99
 -15 4 -1 3.54 0.96
 -15 4 -1 2.85 1.05
 -15 4 -1 4.04 1.07
 15 -4 1 4.12 1.02
 15 -4 1 3.23 0.87
 15 -4 1 4.61 1.01
 -15 4 -2 0.3 1.19
 -15 4 -2 -0.27 0.87
 -15 4 -2 0.37 1
 -15 4 -2 -0.46 1.12
 -15 4 -2 -0.02 0.84
 15 -4 2 0.51 1.03
 15 -4 2 0.36 1.06
 15 -4 2 1.34 0.85
 15 -4 2 0.34 0.7
 -14 4 5 1.48 1.01
 -14 4 5 1.16 0.99
 -14 4 5 2.13 1.02
 -14 4 5 2.32 0.9
 14 -4 -5 2.73 1.09
 14 -4 -5 2.69 1.07
 14 -4 -5 1.88 1.05
 -14 4 4 -1.09 0.87
 -14 4 4 -1.08 0.79
 -14 4 4 -0.42 0.84
 14 -4 -4 0.41 0.86
 14 -4 -4 -0.17 0.87
 14 -4 -4 0.15 0.82
 14 -4 -4 0.82 0.73
 -14 4 3 7.33 1.02
 -14 4 3 6.82 0.97
 -14 4 3 7.78 0.94
 -14 4 3 9.35 1.12
 14 -4 -3 7.36 0.7
 14 -4 -3 6.68 0.94
 14 -4 -3 6.87 0.96
 14 -4 -3 6.04 0.91
 14 -4 -3 8.73 1.05
 -14 4 2 13 1.25
 -14 4 2 12.64 1.29
 -14 4 2 11.68 1.14
 -14 4 2 13.25 1.32
 14 -4 -2 14.61 1.27
 14 -4 -2 11.27 1.15
 14 -4 -2 11.47 1.26
 14 -4 -2 12.67 1.36
 -14 4 1 3.33 0.78
 -14 4 1 4.57 0.83
 -14 4 1 3.63 0.81
 -14 4 1 5.56 0.88
 -14 4 1 5.07 0.87
 14 -4 -1 4.61 0.85
 14 -4 -1 3.37 0.79
 14 -4 -1 3.69 0.9
 14 -4 -1 3.74 0.72
 -14 4 0 1.75 0.72
 -14 4 0 1.54 0.74
 -14 4 0 3.64 0.79
 -14 4 0 2.97 0.83
 -14 4 0 2.79 0.89
 14 -4 0 2.57 0.75
 14 -4 0 1.19 0.66
 14 -4 0 2.95 0.83
 -14 4 -1 0.21 0.85
 -14 4 -1 0.49 0.75
 -14 4 -1 1 0.69
 -14 4 -1 1.53 0.73
 -14 4 -1 1.93 0.85
 -14 4 -1 2.45 0.71
 14 -4 1 0.79 0.69
 14 -4 1 0.49 0.63
 14 -4 1 1.07 0.82
 -14 4 -2 3.01 0.79
 -14 4 -2 2.13 0.96
 -14 4 -2 0.55 1.04
 -14 4 -2 1.4 0.78
 -14 4 -2 0.75 0.89
 -14 4 -2 2.62 0.77
 14 -4 2 2.48 0.68
 14 -4 2 2.55 0.85
 14 -4 2 1.12 0.65
 14 -4 2 3.11 0.83
 14 -4 2 2.54 0.89
 -14 4 -3 0.12 1.03
 -14 4 -3 -0.86 0.91
 -14 4 -3 -0.7 0.81
 -14 4 -3 0.23 0.62
 -14 4 -3 1.14 0.72
 -14 4 -3 -0.24 1.18
 -14 4 -3 0.07 0.77
 14 -4 3 2.21 0.77
 14 -4 3 -1.09 0.95
 14 -4 3 -0.42 1.01
 14 -4 3 -1.32 0.83
 14 -4 3 0.08 0.68
 -13 4 6 -1.2 0.97
 -13 4 6 0.18 1.03
 -13 4 6 1.43 0.93
 -13 4 6 1.77 0.92
 13 -4 -6 -0.25 0.98
 13 -4 -6 -0.72 1.08
 13 -4 -6 0.5 0.94
 13 -4 -6 0.64 0.77
 -13 4 5 -1.61 0.76
 -13 4 5 0.77 0.83
 -13 4 5 0.23 0.83
 -13 4 5 -1.24 0.77
 13 -4 -5 1.82 0.91
 13 -4 -5 -0.12 0.85
 13 -4 -5 1.13 0.88
 -13 4 4 6.76 0.95
 -13 4 4 6.86 0.96
 -13 4 4 7.95 0.98
 13 -4 -4 7.97 0.99
 13 -4 -4 5.81 0.91
 13 -4 -4 8.62 1.02
 -13 4 3 0.5 0.73
 -13 4 3 0.01 0.59
 -13 4 3 -0.79 0.63
 -13 4 3 0.14 0.66
 13 -4 -3 -0.01 0.35
 13 -4 -3 -1.15 0.67
 13 -4 -3 -1.57 0.58
 13 -4 -3 0.49 0.66
 13 -4 -3 -0.46 0.7
 -13 4 2 1.24 0.66
 -13 4 2 1.39 0.68
 -13 4 2 1.98 0.73
 -13 4 2 2.5 0.7
 13 -4 -2 1.61 0.71
 13 -4 -2 1.63 0.67
 13 -4 -2 2.91 0.72
 13 -4 -2 2.6 0.77
 -13 4 1 -0.02 0.53
 -13 4 1 -0.63 0.57
 -13 4 1 0.37 0.52
 -13 4 1 0.54 0.62
 -13 4 1 0.18 0.57
 -13 4 1 0.58 0.59
 13 -4 -1 0.27 0.66
 13 -4 -1 0.2 0.6
 13 -4 -1 0.2 0.53
 13 -4 -1 0.88 0.58
 -13 4 0 0.79 0.58
 -13 4 0 0.79 0.59
 -13 4 0 1.41 0.69
 -13 4 0 1.48 0.66
 -13 4 0 1.64 0.66
 13 -4 0 1.99 0.72
 13 -4 0 1.47 0.65
 13 -4 0 2.51 0.64
 -13 4 -1 4.97 0.86
 -13 4 -1 4.06 0.84
 -13 4 -1 4.64 0.7
 -13 4 -1 5.52 0.72
 -13 4 -1 4.6 0.66
 -13 4 -1 5.43 0.87
 13 -4 1 5.56 0.83
 13 -4 1 4.88 0.7
 13 -4 1 4.11 0.74
 13 -4 1 3.76 0.77
 -13 4 -2 12.36 1.67
 -13 4 -2 12.64 1.07
 -13 4 -2 12.51 1.31
 -13 4 -2 10.9 1.24
 -13 4 -2 11.99 1.05
 -13 4 -2 13.03 1.05
 13 -4 2 10.67 1.03
 13 -4 2 12.74 0.99
 13 -4 2 13.16 1.25
 13 -4 2 13.12 1.12
 13 -4 2 12.13 1.03
 -13 4 -3 4.49 0.79
 -13 4 -3 4.28 1.05
 -13 4 -3 4.77 0.96
 -13 4 -3 3.42 1.11
 -13 4 -3 5.14 0.79
 -13 4 -3 4.2 0.65
 -13 4 -3 3.7 0.73
 13 -4 3 4.94 0.79
 13 -4 3 3.63 0.94
 13 -4 3 3.81 0.7
 13 -4 3 4.96 0.76
 13 -4 3 6.49 1.04
 -13 4 -4 0.63 0.74
 -13 4 -4 1.66 0.98
 -13 4 -4 -0.58 0.85
 -13 4 -4 -0.4 1.02
 -13 4 -4 1.56 1.23
 13 -4 4 -0.93 0.93
 13 -4 4 1.08 0.72
 13 -4 4 -0.75 0.72
 13 -4 4 -0.26 0.96
 -12 4 7 1.94 1.14
 -12 4 7 1.13 1.14
 -12 4 7 0.97 1.03
 12 -4 -7 0.46 1.07
 12 -4 -7 -0.16 1.15
 -12 4 6 5.4 1.02
 -12 4 6 4.71 1.01
 -12 4 6 3.22 0.9
 12 -4 -6 5.1 1.07
 12 -4 -6 4.39 1
 12 -4 -6 4.72 0.7
 12 -4 -6 3.4 0.97
 -12 4 5 1.73 0.78
 -12 4 5 1.1 0.7
 -12 4 5 1.04 0.74
 -12 4 5 2 0.72
 12 -4 -5 0.14 0.75
 12 -4 -5 0.82 0.73
 12 -4 -5 -0.27 0.81
 -12 4 4 -0.15 0.63
 -12 4 4 0.1 0.64
 -12 4 4 0.32 0.59
 12 -4 -4 -0.5 0.67
 12 -4 -4 -0.73 0.65
 12 -4 -4 1.14 0.65
 -12 4 3 -0.39 0.56
 -12 4 3 -0.53 0.57
 -12 4 3 0.39 0.6
 -12 4 3 0.1 0.54
 12 -4 -3 0.08 0.62
 12 -4 -3 0.17 0.29
 12 -4 -3 0.13 0.6
 12 -4 -3 0.08 0.59
 -12 4 2 1.18 0.55
 -12 4 2 0.73 0.57
 -12 4 2 0.87 0.59
 -12 4 2 1.23 0.61
 12 -4 -2 0.62 0.61
 12 -4 -2 1.01 0.57
 12 -4 -2 1.31 0.6
 12 -4 -2 1.86 0.59
 12 -4 -2 1.74 0.59
 -12 4 1 6.51 0.68
 -12 4 1 5.5 0.71
 -12 4 1 6.5 0.88
 -12 4 1 7.29 0.87
 -12 4 1 6.22 0.7
 12 -4 -1 5.3 0.75
 12 -4 -1 5.66 0.74
 12 -4 -1 5.27 0.67
 12 -4 -1 6.33 0.66
 -12 4 0 14.13 1.03
 -12 4 0 11.23 0.87
 -12 4 0 13.5 0.97
 -12 4 0 14.37 1.04
 -12 4 0 13.43 1.11
 12 -4 0 13.52 1
 12 -4 0 14.09 1.05
 12 -4 0 12.12 0.89
 -12 4 -1 0.35 0.59
 -12 4 -1 0.18 0.61
 -12 4 -1 0.64 0.52
 -12 4 -1 0.06 0.49
 -12 4 -1 0.16 0.51
 -12 4 -1 0.49 0.64
 12 -4 1 0.38 0.58
 12 -4 1 1.51 0.51
 12 -4 1 1.06 0.59
 12 -4 1 0.32 0.49
 -12 4 -2 1.26 0.7
 -12 4 -2 1.19 0.53
 -12 4 -2 0.72 0.56
 -12 4 -2 0.83 0.65
 -12 4 -2 2.12 0.6
 -12 4 -2 -0.16 0.73
 12 -4 2 1.67 0.56
 12 -4 2 1.11 0.57
 12 -4 2 0.78 0.53
 12 -4 2 1.16 0.64
 12 -4 2 1.05 0.5
 -12 4 -3 10.63 1
 -12 4 -3 10.97 1.02
 -12 4 -3 11.79 1.3
 -12 4 -3 11.46 1.08
 -12 4 -3 15.33 1.76
 -12 4 -3 11.69 1.23
 -12 4 -3 11.97 0.95
 12 -4 3 12.83 1.27
 12 -4 3 15.43 1.12
 12 -4 3 12.52 1.05
 12 -4 3 13.97 1.28
 12 -4 3 12.79 1.04
 -12 4 -4 3.87 0.76
 -12 4 -4 3.07 0.92
 -12 4 -4 3.96 0.89
 -12 4 -4 3.22 1.14
 -12 4 -4 5.73 0.71
 -12 4 -4 5.17 0.75
 12 -4 4 5.26 0.82
 12 -4 4 4.79 0.75
 12 -4 4 3.37 0.91
 12 -4 4 4.6 0.95
 12 -4 4 3.79 0.77
 -12 4 -5 -0.4 1.01
 -12 4 -5 0.56 1.04
 -12 4 -5 -1.01 1.31
 12 -4 5 0.51 0.92
 12 -4 5 0.22 1.06
 12 -4 5 0.39 0.84
 -11 4 7 3.32 0.97
 -11 4 7 2.32 0.94
 -11 4 7 2.37 1.05
 11 -4 -7 3.3 1.04
 11 -4 -7 3.09 0.98
 11 -4 -7 1.98 0.67
 11 -4 -7 2.71 0.95
 11 -4 -7 2.07 0.57
 11 -4 -7 3.22 1
 -11 4 6 1.93 0.77
 -11 4 6 1.49 0.72
 -11 4 6 2.61 0.84
 11 -4 -6 1.27 0.8
 11 -4 -6 1.42 0.82
 11 -4 -6 1.85 0.41
 11 -4 -6 1.99 0.78
 11 -4 -6 0.91 0.45
 11 -4 -6 1.86 0.53
 -11 4 5 11.3 1.05
 -11 4 5 10.66 1.1
 -11 4 5 11.58 1.13
 11 -4 -5 9.44 1.14
 11 -4 -5 9.68 0.6
 11 -4 -5 8.54 0.89
 11 -4 -5 10.11 1.15
 -11 4 4 2.32 0.64
 -11 4 4 2.31 0.67
 -11 4 4 2.76 0.67
 11 -4 -4 1.26 0.64
 11 -4 -4 1.29 0.63
 11 -4 -4 1.98 0.61
 -11 4 3 12.27 0.9
 -11 4 3 11.26 0.88
 -11 4 3 10.52 0.93
 -11 4 3 11.94 0.97
 11 -4 -3 11.19 0.46
 11 -4 -3 12.14 0.98
 11 -4 -3 13.06 0.95
 11 -4 -3 10.92 1
 11 -4 -3 11.08 0.61
 -11 4 2 13.15 0.95
 -11 4 2 13.51 0.88
 -11 4 2 13.24 1
 -11 4 2 14.6 0.93
 11 -4 -2 12.34 0.99
 11 -4 -2 13.63 0.79
 11 -4 -2 14.44 0.93
 11 -4 -2 13.66 0.93
 11 -4 -2 13.3 0.92
 -11 4 1 18.09 0.97
 -11 4 1 17.07 0.94
 -11 4 1 14.18 0.99
 -11 4 1 17.64 0.95
 -11 4 1 19.08 0.93
 11 -4 -1 18.34 1.03
 11 -4 -1 18.37 0.93
 11 -4 -1 18.66 1
 11 -4 -1 19.61 1.05
 -11 4 0 0.68 0.51
 -11 4 0 0.69 0.51
 -11 4 0 1.06 0.46
 -11 4 0 -0.1 0.43
 -11 4 0 0.99 0.54
 -11 4 0 1.54 0.52
 11 -4 0 0.65 0.54
 11 -4 0 1.8 0.54
 11 -4 0 1.03 0.45
 11 -4 0 1.33 0.54
 -11 4 -1 7.55 0.72
 -11 4 -1 10.39 1.12
 -11 4 -1 10.82 0.9
 -11 4 -1 10.75 0.98
 -11 4 -1 9.84 0.75
 -11 4 -1 9.32 0.79
 11 -4 1 10.42 0.91
 11 -4 1 10.13 0.85
 11 -4 1 10.15 0.85
 11 -4 1 9.64 0.86
 -11 4 -2 9.06 0.78
 -11 4 -2 12.19 0.88
 -11 4 -2 8.96 0.95
 -11 4 -2 8 0.99
 -11 4 -2 9.18 0.89
 11 -4 2 10.02 0.8
 11 -4 2 8.69 0.83
 11 -4 2 11.43 0.85
 11 -4 2 11.34 1.01
 11 -4 2 11.4 0.86
 -11 4 -3 -0.94 0.56
 -11 4 -3 0.24 0.56
 -11 4 -3 0.22 0.44
 -11 4 -3 -0.52 0.51
 -11 4 -3 0.31 0.5
 -11 4 -3 0.59 0.76
 -11 4 -3 0.39 0.69
 11 -4 3 -0.36 0.46
 11 -4 3 0.65 0.56
 11 -4 3 0.46 0.53
 11 -4 3 -0.73 0.53
 -11 4 -4 1.78 0.66
 -11 4 -4 1.14 0.93
 -11 4 -4 1.82 0.7
 -11 4 -4 2.56 0.66
 -11 4 -4 3.09 0.44
 -11 4 -4 3.06 0.81
 11 -4 4 2.45 0.68
 11 -4 4 2.73 0.82
 11 -4 4 3.04 0.63
 11 -4 4 1.87 0.73
 11 -4 4 3.1 0.64
 -11 4 -5 3.73 0.77
 -11 4 -5 3.2 0.66
 -11 4 -5 3.15 1.03
 -11 4 -5 1.29 1.04
 11 -4 5 2.16 0.7
 11 -4 5 3.05 0.67
 11 -4 5 3.04 0.96
 11 -4 5 2.95 0.8
 11 -4 5 2.88 0.8
 -11 4 -6 0.21 1.03
 11 -4 6 0.97 1.16
 11 -4 6 1.52 0.97
 -10 4 8 -0.81 1.24
 -10 4 8 1.23 1.14
 10 -4 -8 0.72 1.09
 10 -4 -8 1.46 1.11
 -10 4 7 2.88 0.92
 -10 4 7 2.93 0.86
 -10 4 7 2.3 0.93
 10 -4 -7 2.24 0.73
 10 -4 -7 2.25 0.75
 10 -4 -7 3.64 0.92
 10 -4 -7 1.78 0.93
 10 -4 -7 2.77 0.94
 -10 4 6 6.63 0.86
 -10 4 6 9.53 1.13
 -10 4 6 9.36 1.06
 10 -4 -6 7.58 0.9
 10 -4 -6 7 0.86
 10 -4 -6 7.73 0.92
 10 -4 -6 7.97 0.91
 10 -4 -6 8.36 0.65
 10 -4 -6 8.3 1.01
 10 -4 -6 8.1 0.93
 -10 4 5 8.46 0.99
 -10 4 5 8.83 0.98
 -10 4 5 8.93 0.9
 10 -4 -5 8.7 0.89
 10 -4 -5 9.31 1.02
 10 -4 -5 8.65 0.69
 10 -4 -5 9.57 1.01
 -10 4 4 0.61 0.53
 -10 4 4 1.07 0.54
 10 -4 -4 1.19 0.51
 10 -4 -4 0.1 0.54
 10 -4 -4 0.7 0.28
 10 -4 -4 1.01 0.54
 -10 4 3 1.75 0.47
 -10 4 3 2.19 0.53
 -10 4 3 1.96 0.51
 -10 4 3 1.9 0.47
 10 -4 -3 1.27 0.51
 10 -4 -3 1.75 0.2
 10 -4 -3 1.4 0.47
 10 -4 -3 1.59 0.5
 10 -4 -3 1.67 0.3
 -10 4 2 0.47 0.42
 -10 4 2 0.43 0.42
 -10 4 2 0.45 0.45
 -10 4 2 0.91 0.42
 10 -4 -2 0.84 0.44
 10 -4 -2 0.19 0.46
 10 -4 -2 0.28 0.45
 10 -4 -2 0.83 0.46
 10 -4 -2 0.26 0.32
 -10 4 1 0.29 0.43
 -10 4 1 -0.13 0.39
 -10 4 1 -0.01 0.39
 -10 4 1 -0.61 0.38
 -10 4 1 0.22 0.37
 10 -4 -1 0.38 0.38
 10 -4 -1 0.89 0.47
 10 -4 -1 0.36 0.42
 -10 4 0 13.37 0.84
 -10 4 0 11.79 0.82
 -10 4 0 13.68 0.88
 -10 4 0 13.21 0.87
 -10 4 0 13.12 0.93
 -10 4 0 11.98 0.73
 10 -4 0 11.48 0.96
 10 -4 0 12.56 0.83
 10 -4 0 10.7 0.78
 10 -4 0 11.89 0.85
 -10 4 -1 7.36 0.75
 -10 4 -1 6.65 0.69
 -10 4 -1 6.36 0.66
 -10 4 -1 6.73 0.65
 -10 4 -1 6.28 0.76
 -10 4 -1 7.39 0.95
 10 -4 1 7.31 0.72
 10 -4 1 7.67 0.78
 10 -4 1 6.96 1
 10 -4 1 7.38 0.77
 10 -4 1 6.46 0.69
 -10 4 -2 11.73 0.74
 -10 4 -2 11.84 0.9
 -10 4 -2 14.11 0.88
 -10 4 -2 12.76 0.97
 -10 4 -2 14.28 0.91
 -10 4 -2 14.03 1.22
 10 -4 2 12.23 0.85
 10 -4 2 14.36 0.95
 10 -4 2 11.91 0.74
 10 -4 2 11.75 0.92
 -10 4 -3 6.47 0.72
 -10 4 -3 8.32 0.8
 -10 4 -3 7.33 0.71
 -10 4 -3 7.89 0.95
 -10 4 -3 6.86 0.93
 -10 4 -3 8.15 0.81
 10 -4 3 8.01 0.82
 10 -4 3 8.95 0.88
 10 -4 3 7.57 0.8
 10 -4 3 7.58 0.77
 -10 4 -4 8.59 0.66
 -10 4 -4 6.79 1.04
 -10 4 -4 7.49 0.84
 -10 4 -4 7.54 0.79
 -10 4 -4 7.65 0.84
 -10 4 -4 6.41 0.78
 10 -4 4 6.65 0.68
 10 -4 4 9.23 1.1
 10 -4 4 8.56 0.84
 10 -4 4 8.77 0.92
 10 -4 4 5.76 0.73
 -10 4 -5 4.87 0.69
 -10 4 -5 3.37 0.85
 -10 4 -5 4.85 0.75
 -10 4 -5 2.83 0.97
 10 -4 5 2.15 0.65
 10 -4 5 4.26 0.78
 10 -4 5 4.53 0.75
 10 -4 5 3.32 0.87
 10 -4 5 4.18 0.73
 -10 4 -6 -0.94 0.99
 -10 4 -6 2.1 0.92
 -10 4 -6 2.44 0.83
 10 -4 6 2 0.71
 10 -4 6 1.77 0.9
 10 -4 6 0.96 0.69
 10 -4 6 2.28 0.97
 -9 4 8 1.82 1.13
 -9 4 8 4.85 1.13
 -9 4 8 0.38 0.95
 9 -4 -8 1.74 1.08
 9 -4 -8 1.29 0.96
 9 -4 -8 1.79 1.07
 -9 4 7 -0.67 0.66
 -9 4 7 0.31 0.76
 -9 4 7 -0.37 0.77
 9 -4 -7 0.9 0.83
 9 -4 -7 0.04 0.65
 9 -4 -7 -0.15 0.73
 9 -4 -7 0.38 0.78
 -9 4 6 9.49 0.92
 -9 4 6 7.19 0.8
 -9 4 6 8.43 0.97
 9 -4 -6 7.85 0.87
 9 -4 -6 8.74 1.06
 9 -4 -6 9.05 1.13
 9 -4 -6 7.14 0.8
 9 -4 -6 7.53 0.39
 -9 4 5 3.2 0.58
 -9 4 5 3.64 0.62
 -9 4 5 3.43 0.62
 9 -4 -5 3.87 0.66
 9 -4 -5 2.88 0.6
 9 -4 -5 4.21 0.71
 9 -4 -5 2.77 0.43
 9 -4 -5 2.64 0.65
 -9 4 4 0.19 0.42
 -9 4 4 -0.08 0.44
 -9 4 4 0.21 0.38
 9 -4 -4 0.39 0.49
 9 -4 -4 0.62 0.44
 9 -4 -4 0.5 0.29
 9 -4 -4 0.83 0.49
 -9 4 3 7.99 0.67
 -9 4 3 7.19 0.67
 -9 4 3 7.41 0.72
 9 -4 -3 7.73 0.71
 9 -4 -3 7.75 0.77
 9 -4 -3 7.5 0.54
 9 -4 -3 7.71 0.68
 -9 4 2 83.65 1.86
 -9 4 2 84.68 1.9
 -9 4 2 82.45 1.68
 -9 4 2 83.36 1.88
 9 -4 -2 82.77 1.83
 9 -4 -2 82.42 1.75
 9 -4 -2 82.09 1.9
 9 -4 -2 80.12 1.88
 9 -4 -2 84.13 1.9
 -9 4 1 51.64 1.41
 -9 4 1 50.06 1.24
 -9 4 1 50.27 1.36
 -9 4 1 53.75 1.44
 -9 4 1 51.22 1.46
 9 -4 -1 52.67 1.44
 9 -4 -1 52.69 1.25
 9 -4 -1 53.83 1.41
 9 -4 -1 53.26 1.45
 -9 4 0 1.14 0.39
 -9 4 0 1.06 0.37
 -9 4 0 0.9 0.39
 -9 4 0 1.51 0.42
 -9 4 0 1.03 0.35
 9 -4 0 0.3 0.4
 9 -4 0 0.91 0.41
 9 -4 0 0.83 0.42
 9 -4 0 0.37 0.33
 -9 4 -1 10.99 0.73
 -9 4 -1 10.04 0.76
 -9 4 -1 9.03 0.76
 -9 4 -1 10.15 0.61
 -9 4 -1 10.15 0.93
 -9 4 -1 8.16 0.71
 9 -4 1 10.88 0.75
 9 -4 1 9.9 0.68
 9 -4 1 9.32 0.68
 9 -4 1 9.2 0.95
 9 -4 1 9.77 0.71
 -9 4 -2 33.74 1.5
 -9 4 -2 32.86 1.15
 -9 4 -2 30.91 1.18
 -9 4 -2 31.69 0.94
 -9 4 -2 32.91 1.17
 -9 4 -2 32.73 1.14
 9 -4 2 32.72 1.14
 9 -4 2 28.69 1.16
 9 -4 2 33.48 0.95
 9 -4 2 33.91 1.19
 -9 4 -3 14.84 1.3
 -9 4 -3 15.38 0.74
 -9 4 -3 14.94 0.97
 -9 4 -3 15.48 0.94
 -9 4 -3 14.66 0.94
 -9 4 -3 15.14 0.95
 9 -4 3 13.41 0.96
 9 -4 3 16.54 0.98
 9 -4 3 16.61 0.97
 9 -4 3 15.24 0.87
 -9 4 -4 2.59 0.61
 -9 4 -4 3.8 0.67
 -9 4 -4 4.73 0.6
 -9 4 -4 3.5 0.59
 -9 4 -4 1.63 0.69
 -9 4 -4 4.06 0.66
 9 -4 4 3.71 0.6
 9 -4 4 3.16 0.61
 9 -4 4 3.02 0.62
 9 -4 4 4.92 0.66
 9 -4 4 2.74 0.58
 -9 4 -5 0.27 0.48
 -9 4 -5 0.15 0.65
 -9 4 -5 0.74 0.61
 -9 4 -5 -0.49 0.66
 9 -4 5 -0.56 0.51
 9 -4 5 1.44 0.65
 9 -4 5 -0.15 0.53
 9 -4 5 1.39 0.69
 9 -4 5 0.67 0.62
 9 -4 5 1.23 0.54
 -9 4 -6 4.55 0.76
 -9 4 -6 3.45 0.92
 -9 4 -6 5.81 0.92
 -9 4 -6 4.59 0.85
 9 -4 6 6.13 0.73
 9 -4 6 3.62 0.91
 9 -4 6 4.57 0.92
 9 -4 6 4.91 0.77
 9 -4 6 5.91 0.94
 9 -4 6 6.66 0.85
 -9 4 -7 1.87 1.19
 -9 4 -7 1.08 1.11
 9 -4 7 -0.12 1.07
 9 -4 7 0.84 1.01
 9 -4 7 0.51 1.08
 -8 4 8 7.23 1.16
 -8 4 8 5.8 1.02
 8 -4 -8 5.4 1.08
 8 -4 -8 9.17 1.17
 8 -4 -8 7.76 1.08
 8 -4 -8 5.38 0.87
 -8 4 7 -1.17 0.68
 -8 4 7 -0.41 0.74
 8 -4 -7 0.6 0.59
 8 -4 -7 -0.8 0.65
 8 -4 -7 0.02 0.71
 8 -4 -7 0.39 0.75
 -8 4 6 0.31 0.51
 -8 4 6 1.27 0.55
 -8 4 6 1.28 0.54
 8 -4 -6 1.42 0.54
 8 -4 -6 0.84 0.6
 8 -4 -6 0.63 0.49
 -8 4 5 6.16 0.58
 -8 4 5 4.55 0.58
 -8 4 5 6.3 0.68
 8 -4 -5 6.1 0.63
 8 -4 -5 5.22 0.66
 8 -4 -5 4.93 0.6
 8 -4 -5 4.58 0.51
 -8 4 4 49.86 1.4
 -8 4 4 50.9 1.39
 -8 4 4 51.34 1.25
 8 -4 -4 51.89 1.42
 8 -4 -4 50.31 1.36
 8 -4 -4 48.52 1.38
 8 -4 -4 52.45 1.29
 8 -4 -4 50.98 1.49
 -8 4 3 31.89 1.07
 -8 4 3 31.37 0.93
 -8 4 3 31.53 1.03
 8 -4 -3 30.38 1.07
 8 -4 -3 31.83 0.95
 8 -4 -3 32.42 1.11
 8 -4 -3 31.99 1.03
 -8 4 2 3.18 0.39
 -8 4 2 2.95 0.43
 -8 4 2 3.09 0.46
 -8 4 2 2.76 0.43
 8 -4 -2 2.48 0.33
 8 -4 -2 3.25 0.45
 8 -4 -2 3.2 0.41
 8 -4 -2 3.47 0.43
 -8 4 1 0.8 0.32
 -8 4 1 0.84 0.32
 -8 4 1 0.81 0.38
 -8 4 1 0.6 0.34
 -8 4 1 1.03 0.38
 8 -4 -1 0.97 0.31
 8 -4 -1 0.79 0.36
 8 -4 -1 0.75 0.31
 8 -4 -1 0.84 0.38
 -8 4 0 17.95 0.65
 -8 4 0 19.49 0.82
 -8 4 0 18.83 0.88
 -8 4 0 18.93 0.79
 -8 4 0 19.04 0.8
 8 -4 0 17.29 0.77
 8 -4 0 17.84 0.81
 8 -4 0 17.52 0.8
 8 -4 0 18.25 0.91
 8 -4 0 17.88 0.4
 -8 4 -1 6.46 0.49
 -8 4 -1 5.53 0.77
 -8 4 -1 7.44 0.66
 -8 4 -1 6.39 0.62
 -8 4 -1 6.8 0.65
 -8 4 -1 5.98 0.66
 8 -4 1 5.76 0.55
 8 -4 1 7.2 0.69
 8 -4 1 5.86 0.79
 8 -4 1 6.52 0.67
 8 -4 1 6.71 0.62
 -8 4 -2 19.8 0.92
 -8 4 -2 19.24 0.85
 -8 4 -2 20.23 1.16
 -8 4 -2 22.34 0.95
 -8 4 -2 20.55 0.9
 8 -4 2 20.27 0.87
 8 -4 2 19.47 1.13
 8 -4 2 18.57 0.87
 8 -4 2 19.66 0.95
 8 -4 2 19.61 0.7
 -8 4 -3 0.9 0.44
 -8 4 -3 0.71 0.43
 -8 4 -3 1.17 0.34
 -8 4 -3 0.24 0.52
 -8 4 -3 1.93 0.46
 -8 4 -3 1.3 0.44
 8 -4 3 1.37 0.46
 8 -4 3 0.93 0.38
 8 -4 3 0.71 0.44
 8 -4 3 0.69 0.47
 -8 4 -4 1.11 0.59
 -8 4 -4 1.32 0.51
 -8 4 -4 0.85 0.52
 -8 4 -4 0.74 0.5
 -8 4 -4 1.02 0.52
 8 -4 4 1.47 0.48
 8 -4 4 0.79 0.47
 8 -4 4 1.54 0.52
 8 -4 4 1.46 0.52
 8 -4 4 1.06 0.46
 8 -4 4 1.93 0.51
 -8 4 -5 2.13 0.62
 -8 4 -5 1.05 0.62
 -8 4 -5 0.53 0.48
 -8 4 -5 1.48 0.6
 8 -4 5 1.06 0.59
 8 -4 5 1.11 0.46
 8 -4 5 1.13 0.51
 8 -4 5 1.48 0.58
 8 -4 5 0.61 0.52
 8 -4 5 1.75 0.61
 -8 4 -6 10.19 1.02
 -8 4 -6 11.05 1.47
 -8 4 -6 10.36 1.22
 -8 4 -6 9.16 0.98
 8 -4 6 12.93 1.05
 8 -4 6 11.68 0.96
 8 -4 6 10.9 1.21
 8 -4 6 9.42 0.96
 8 -4 6 10.04 1.21
 -8 4 -7 5.04 0.95
 -8 4 -7 4.68 1.07
 -8 4 -7 6.45 1.11
 8 -4 7 7.71 1.16
 8 -4 7 3.27 1.05
 8 -4 7 4.01 0.78
 8 -4 7 4.88 1.08
 -7 4 8 2.5 0.79
 -7 4 8 1.16 0.83
 -7 4 8 2.8 0.95
 7 -4 -8 1.73 0.94
 7 -4 -8 1.58 0.87
 7 -4 -8 2.55 0.67
 7 -4 -8 3.12 1.01
 7 -4 -8 0.76 1.01
 -7 4 7 5.15 0.87
 -7 4 7 6.08 0.78
 7 -4 -7 4.61 0.73
 7 -4 -7 5.18 0.74
 7 -4 -7 5.38 0.91
 7 -4 -7 6.39 0.87
 -7 4 6 13.76 0.97
 -7 4 6 13.92 0.88
 7 -4 -6 14.15 0.98
 7 -4 -6 12.7 0.98
 7 -4 -6 12.9 0.92
 -7 4 5 0.55 0.39
 -7 4 5 0.3 0.43
 7 -4 -5 0.53 0.47
 7 -4 -5 0.66 0.44
 7 -4 -5 0.38 0.22
 7 -4 -5 0.56 0.46
 -7 4 4 0.91 0.35
 -7 4 4 1.05 0.39
 -7 4 4 0.63 0.35
 7 -4 -4 1.42 0.4
 7 -4 -4 1.03 0.44
 7 -4 -4 1.21 0.38
 -7 4 3 0.78 0.36
 -7 4 3 1.01 0.38
 7 -4 -3 1.31 0.34
 7 -4 -3 1.08 0.36
 7 -4 -3 0.64 0.38
 7 -4 -3 0.66 0.28
 7 -4 -3 0.72 0.4
 -7 4 2 42.13 1.14
 -7 4 2 43.27 0.79
 -7 4 2 42.11 0.98
 -7 4 2 44.93 1.19
 7 -4 -2 42.37 1.13
 7 -4 -2 43.7 1.07
 7 -4 -2 44.05 1.17
 7 -4 -2 42.38 1.16
 -7 4 1 2.23 0.33
 -7 4 1 2.18 0.31
 -7 4 1 2.3 0.4
 -7 4 1 1.66 0.37
 -7 4 1 2.55 0.38
 7 -4 -1 2.62 0.41
 7 -4 -1 2.26 0.33
 7 -4 -1 2.15 0.41
 7 -4 -1 2.37 0.33
 -7 4 0 66.38 1.52
 -7 4 0 66.51 1.45
 -7 4 0 65.76 1.53
 -7 4 0 65.2 1.27
 -7 4 0 68.08 1.71
 7 -4 0 66.94 1.7
 7 -4 0 66.01 1.5
 7 -4 0 66.47 1.43
 7 -4 0 64.95 1.51
 -7 4 -1 2.95 0.47
 -7 4 -1 3.14 0.47
 -7 4 -1 3 0.31
 -7 4 -1 2.93 0.43
 -7 4 -1 3.34 0.42
 -7 4 -1 3.24 0.46
 7 -4 1 2.92 0.46
 7 -4 1 2.74 0.46
 7 -4 1 2.64 0.44
 7 -4 1 2.45 0.39
 7 -4 1 2.89 0.37
 -7 4 -2 6.42 0.67
 -7 4 -2 7.47 0.82
 -7 4 -2 7.79 0.66
 -7 4 -2 7.49 0.61
 -7 4 -2 7.18 0.61
 7 -4 2 7.52 0.45
 7 -4 2 7.67 0.62
 7 -4 2 9.11 0.66
 7 -4 2 8.08 0.87
 7 -4 2 7.17 0.62
 -7 4 -3 13.77 0.8
 -7 4 -3 14.73 0.64
 -7 4 -3 15.21 0.8
 -7 4 -3 15.66 1.09
 -7 4 -3 14.81 0.75
 -7 4 -3 14.91 0.79
 7 -4 3 13.23 0.79
 7 -4 3 13.81 0.83
 7 -4 3 14.14 0.75
 7 -4 3 13.87 0.77
 -7 4 -4 21.02 1.33
 -7 4 -4 21.56 0.95
 -7 4 -4 21.01 0.99
 -7 4 -4 22.42 1.02
 -7 4 -4 21.9 1.04
 7 -4 4 21.67 1.05
 7 -4 4 21.27 0.84
 7 -4 4 24.34 1.07
 7 -4 4 20.6 0.94
 7 -4 4 21.25 0.98
 7 -4 4 20.75 0.96
 -7 4 -5 3.64 0.65
 -7 4 -5 3.54 0.7
 -7 4 -5 2.33 0.55
 -7 4 -5 3.64 0.59
 7 -4 5 3.45 0.58
 7 -4 5 3.14 0.58
 7 -4 5 3.23 0.59
 7 -4 5 3.07 0.59
 7 -4 5 3.33 0.43
 7 -4 5 3.19 0.55
 -7 4 -6 4.81 0.77
 -7 4 -6 2.82 0.81
 -7 4 -6 3.4 0.72
 -7 4 -6 3.02 0.8
 -7 4 -6 4.54 0.69
 7 -4 6 3.63 0.76
 7 -4 6 5.14 0.71
 7 -4 6 3.74 0.8
 7 -4 6 2.32 0.58
 7 -4 6 3.98 0.76
 -7 4 -7 1.76 0.74
 -7 4 -7 -0.47 0.79
 -7 4 -7 0.01 0.65
 -7 4 -7 -1.12 0.84
 7 -4 7 -0.44 0.8
 7 -4 7 0.53 0.86
 7 -4 7 2.22 0.68
 7 -4 7 2.74 0.73
 7 -4 7 -0.88 0.86
 6 -4 -9 1.75 1.21
 -6 4 8 11.26 1.15
 -6 4 8 7.93 1
 -6 4 8 7.8 0.54
 -6 4 8 8.52 0.94
 6 -4 -8 7.39 0.96
 6 -4 -8 9.73 1.12
 6 -4 -8 8.66 0.98
 6 -4 -8 6.13 0.8
 6 -4 -8 6.09 1.17
 -6 4 7 2.37 0.69
 -6 4 7 1.79 0.23
 -6 4 7 2.79 0.74
 6 -4 -7 2.07 0.84
 6 -4 -7 1.61 0.55
 6 -4 -7 2.54 0.73
 6 -4 -7 1.46 0.59
 -6 4 6 1.86 0.5
 6 -4 -6 1.47 0.5
 6 -4 -6 2.89 0.55
 6 -4 -6 2.57 0.58
 -6 4 5 -0.27 0.34
 -6 4 5 -0.42 0.39
 6 -4 -5 -0.34 0.42
 6 -4 -5 0.39 0.43
 6 -4 -5 0.02 0.37
 -6 4 4 36.26 0.94
 -6 4 4 37.81 1.14
 6 -4 -4 36.83 1.12
 6 -4 -4 36.34 1.01
 6 -4 -4 37 1.2
 -6 4 3 41.24 1.11
 -6 4 3 43.31 1.15
 6 -4 -3 40.38 1.17
 6 -4 -3 41.53 0.98
 6 -4 -3 41.73 1.12
 -6 4 2 30.84 0.95
 -6 4 2 30.23 0.77
 -6 4 2 30.5 0.94
 6 -4 -2 30.7 0.91
 6 -4 -2 32.19 0.96
 6 -4 -2 31.01 0.87
 6 -4 -2 31.02 0.93
 -6 4 1 143.87 2.49
 -6 4 1 150.38 2.62
 -6 4 1 145.18 3.02
 -6 4 1 142.48 2.37
 -6 4 1 146.02 2.61
 6 -4 -1 143.88 2.99
 6 -4 -1 146.49 2.44
 6 -4 -1 140.81 2.58
 6 -4 -1 143.5 2.6
 -6 4 0 42.84 1.24
 -6 4 0 42.86 1.12
 -6 4 0 41.09 1.09
 -6 4 0 41.4 0.87
 -6 4 0 41 1.04
 6 -4 0 42.36 1.02
 6 -4 0 43.39 1.22
 6 -4 0 42.83 1.11
 6 -4 0 43 1.1
 -6 4 -1 139.39 2.35
 -6 4 -1 146.91 2.65
 -6 4 -1 142.02 3.18
 -6 4 -1 144.19 2.5
 -6 4 -1 146.97 2.67
 -6 4 -1 142.93 2.53
 6 -4 1 139.64 2.62
 6 -4 1 146.77 2.65
 6 -4 1 143.64 2.49
 6 -4 1 143.07 2.47
 6 -4 1 146.45 3.2
 -6 4 -2 57.38 1.28
 -6 4 -2 57.12 1.28
 -6 4 -2 57.06 1.4
 -6 4 -2 57.06 1.41
 -6 4 -2 57.33 1.71
 6 -4 2 57.12 1.28
 6 -4 2 56.57 1.09
 6 -4 2 56.8 1.73
 6 -4 2 55.83 1.38
 6 -4 2 56.23 1.39
 6 -4 2 54.99 1.27
 -6 4 -3 20.28 0.89
 -6 4 -3 19.54 0.92
 -6 4 -3 19.39 1.12
 -6 4 -3 19.77 0.69
 -6 4 -3 20.06 0.8
 -6 4 -3 19.47 0.76
 6 -4 3 18.91 0.76
 6 -4 3 19.68 0.89
 6 -4 3 20.78 0.81
 6 -4 3 22.02 1.21
 6 -4 3 19.8 0.81
 6 -4 3 20.33 0.9
 -6 4 -4 1.57 0.48
 -6 4 -4 2.21 0.46
 -6 4 -4 1.88 0.56
 -6 4 -4 2.22 0.5
 6 -4 4 2.34 0.47
 6 -4 4 1.26 0.41
 6 -4 4 2.41 0.52
 6 -4 4 2.89 0.47
 6 -4 4 2.04 0.37
 6 -4 4 2.42 0.47
 -6 4 -5 5.3 0.64
 -6 4 -5 6.11 0.7
 -6 4 -5 4.9 0.75
 -6 4 -5 7.26 0.8
 6 -4 5 7.09 0.77
 6 -4 5 6.92 0.72
 6 -4 5 6.71 0.78
 6 -4 5 6.33 0.68
 6 -4 5 5.61 0.63
 6 -4 5 5.7 0.5
 -6 4 -6 15.89 1.43
 -6 4 -6 16.06 0.96
 -6 4 -6 17.62 1.26
 -6 4 -6 16.2 1.09
 -6 4 -6 17.4 1.12
 6 -4 6 15.86 1.12
 6 -4 6 13.86 0.93
 6 -4 6 16.45 1.05
 6 -4 6 16.31 1.19
 6 -4 6 17.47 1.11
 -6 4 -7 1.02 0.65
 -6 4 -7 0.53 0.79
 -6 4 -7 -0.42 0.71
 -6 4 -7 1.35 0.65
 6 -4 7 0.81 0.79
 6 -4 7 1.73 0.61
 6 -4 7 2.13 0.62
 6 -4 7 0.27 0.81
 6 -4 7 1.77 0.77
 -6 4 -8 1.65 1.05
 6 -4 8 1.6 1.09
 6 -4 8 3.82 1.17
 6 -4 8 -0.67 1.08
 -5 4 9 -0.12 0.98
 5 -4 -9 0.3 1.11
 5 -4 -9 -1.17 1.3
 -5 4 8 7.56 0.91
 -5 4 8 7.38 0.9
 -5 4 8 7.53 0.94
 5 -4 -8 5.51 1.13
 5 -4 -8 7.69 0.93
 5 -4 -8 8.91 1.09
 5 -4 -8 8.7 0.95
 5 -4 -8 7.36 0.87
 -5 4 7 1.15 0.55
 -5 4 7 1.08 0.62
 -5 4 7 -0.27 0.57
 -5 4 7 0.61 0.5
 5 -4 -7 0.69 0.53
 5 -4 -7 0.23 0.68
 5 -4 -7 0.05 0.53
 5 -4 -7 0.32 0.54
 5 -4 -7 -0.14 0.79
 -5 4 6 0.48 0.49
 -5 4 6 0.61 0.46
 -5 4 6 0.82 0.45
 5 -4 -6 0.63 0.51
 5 -4 -6 0.27 0.48
 5 -4 -6 0.76 0.5
 -5 4 5 51.96 1.4
 -5 4 5 53.01 1.19
 -5 4 5 53.24 0.89
 5 -4 -5 52.86 1.48
 5 -4 -5 54.4 1.35
 5 -4 -5 52.84 1.43
 -5 4 4 33.61 0.84
 -5 4 4 32.65 1.02
 5 -4 -4 33.34 0.94
 5 -4 -4 31.34 1
 5 -4 -4 32.3 1.07
 -5 4 3 0.33 0.32
 -5 4 3 -0.08 0.23
 5 -4 -3 0.13 0.32
 5 -4 -3 -0.18 0.29
 5 -4 -3 0.07 0.25
 -5 4 2 9.46 0.59
 -5 4 2 10.49 0.57
 5 -4 -2 11.45 0.65
 5 -4 -2 9.72 0.44
 5 -4 -2 9.6 0.57
 5 -4 -2 10.23 0.55
 -5 4 1 125.02 2.1
 -5 4 1 119.58 1.97
 -5 4 1 120.7 2.21
 -5 4 1 120.54 2.2
 5 -4 -1 123.22 2.55
 5 -4 -1 123.33 2.21
 5 -4 -1 121.53 2.22
 5 -4 -1 122.84 2.06
 -5 4 0 36.5 1.1
 -5 4 0 36.75 1.02
 -5 4 0 39.19 0.93
 -5 4 0 36.53 1
 -5 4 0 36.76 0.75
 5 -4 0 39.18 1.1
 5 -4 0 38.07 1.01
 5 -4 0 37.16 1.01
 5 -4 0 36.81 0.88
 -5 4 -1 10.21 0.54
 -5 4 -1 10.34 0.55
 -5 4 -1 9.69 0.64
 -5 4 -1 9.81 0.71
 -5 4 -1 9.92 0.61
 5 -4 1 10.11 0.61
 5 -4 1 9.87 0.6
 5 -4 1 10.53 0.75
 5 -4 1 10.23 0.53
 -5 4 -2 48.7 1.07
 -5 4 -2 47.28 1.19
 -5 4 -2 46.41 1.23
 -5 4 -2 47.17 1.09
 -5 4 -2 47.93 1.07
 -5 4 -2 48.11 1.52
 5 -4 2 49.93 1.55
 5 -4 2 49.04 1.22
 5 -4 2 45.76 1.09
 5 -4 2 47.06 0.88
 5 -4 2 45.56 1.18
 5 -4 2 48.97 1.13
 -5 4 -3 11.44 0.56
 -5 4 -3 11.76 0.65
 -5 4 -3 10.79 0.68
 -5 4 -3 12.93 0.6
 -5 4 -3 12.15 0.74
 -5 4 -3 13.19 0.98
 5 -4 3 13.34 1
 5 -4 3 11.55 0.63
 5 -4 3 12.77 0.74
 5 -4 3 13.09 0.61
 5 -4 3 12.32 0.73
 5 -4 3 12.39 0.67
 -5 4 -4 0.83 0.41
 -5 4 -4 0.34 0.43
 -5 4 -4 1 0.36
 -5 4 -4 0.98 0.44
 5 -4 4 0.94 0.38
 5 -4 4 0.45 0.27
 5 -4 4 1.44 0.39
 5 -4 4 0.5 0.38
 5 -4 4 0.44 0.37
 5 -4 4 0.74 0.36
 -5 4 -5 17.72 0.93
 -5 4 -5 16.15 1.27
 -5 4 -5 17.1 1.02
 -5 4 -5 17.08 0.88
 -5 4 -5 16.84 0.93
 5 -4 5 17.76 0.97
 5 -4 5 17.27 0.89
 5 -4 5 17.03 0.95
 5 -4 5 16.54 0.94
 5 -4 5 18.09 0.96
 5 -4 5 17.17 0.49
 -5 4 -6 16.02 1
 -5 4 -6 13.43 1.14
 -5 4 -6 12.94 1.04
 -5 4 -6 11.93 1.29
 5 -4 6 14.74 0.93
 5 -4 6 12.96 0.87
 5 -4 6 13.81 1.01
 5 -4 6 14.79 1.11
 5 -4 6 14.47 1.05
 -5 4 -7 12.07 1.13
 -5 4 -7 7.24 1.07
 -5 4 -7 14.91 1.09
 -5 4 -7 9.36 1.27
 5 -4 7 9.41 0.96
 5 -4 7 12.58 1.23
 5 -4 7 12.18 1.28
 5 -4 7 10.53 1.24
 5 -4 7 11.38 1.07
 -5 4 -8 0.78 0.8
 -5 4 -8 0.23 0.88
 5 -4 8 -0.48 0.92
 5 -4 8 1.08 0.89
 5 -4 8 0.76 0.98
 4 -4 -9 0.66 1.01
 4 -4 -9 -1.12 1.29
 -4 4 8 0.07 0.72
 -4 4 8 1.75 0.71
 -4 4 8 0.1 0.56
 -4 4 8 0.32 0.71
 4 -4 -8 0.65 0.69
 4 -4 -8 -0.24 0.59
 4 -4 -8 1.56 0.71
 4 -4 -8 0.24 1.01
 -4 4 7 17.14 1.03
 -4 4 7 17.98 1.13
 -4 4 7 19.43 1.13
 -4 4 7 19.42 1.06
 4 -4 -7 17.7 1.05
 4 -4 -7 17.82 1.12
 4 -4 -7 18.48 1.65
 4 -4 -7 17.71 1.15
 -4 4 6 2.21 0.52
 -4 4 6 2.91 0.54
 -4 4 6 2.46 0.52
 -4 4 6 2.87 0.53
 4 -4 -6 2.67 0.53
 4 -4 -6 2.16 0.51
 -4 4 5 0.17 0.38
 -4 4 5 0.02 0.38
 4 -4 -5 -0.02 0.38
 4 -4 -5 0.16 0.36
 -4 4 4 0.33 0.15
 -4 4 4 0.48 0.25
 -4 4 4 0.7 0.36
 4 -4 -4 0.23 0.34
 4 -4 -4 1.24 0.39
 -4 4 3 13.44 0.68
 -4 4 3 13.49 0.49
 4 -4 -3 13.02 0.66
 4 -4 -3 13.72 0.73
 4 -4 -3 13.99 0.56
 -4 4 2 9.19 0.54
 -4 4 2 7.9 0.51
 4 -4 -2 9.18 0.41
 4 -4 -2 7.91 0.56
 4 -4 -2 9.01 0.56
 -4 4 1 4.61 0.3
 -4 4 1 4.69 0.26
 -4 4 1 4.2 0.45
 -4 4 1 4.99 0.45
 4 -4 -1 4.59 0.5
 4 -4 -1 4.41 0.46
 4 -4 -1 4.67 0.45
 -4 4 0 16.9 0.58
 -4 4 0 16.4 0.67
 -4 4 0 15.62 0.66
 -4 4 0 16.46 0.73
 4 -4 0 15.82 0.41
 4 -4 0 15.62 0.63
 4 -4 0 16.12 0.44
 4 -4 0 16.19 0.7
 4 -4 0 15.37 0.62
 4 -4 0 15.87 0.54
 -4 4 -1 0.76 0.26
 -4 4 -1 0.9 0.33
 -4 4 -1 0.67 0.26
 -4 4 -1 0.89 0.33
 -4 4 -1 1.04 0.33
 4 -4 1 0.7 0.34
 4 -4 1 1.08 0.35
 4 -4 1 0.57 0.25
 4 -4 1 0.33 0.33
 -4 4 -2 7.58 0.46
 -4 4 -2 7.78 0.44
 -4 4 -2 8.19 0.6
 -4 4 -2 7.44 0.48
 -4 4 -2 6.92 0.53
 -4 4 -2 7.57 0.77
 4 -4 2 7.99 0.59
 4 -4 2 8.59 0.74
 4 -4 2 7.33 0.48
 4 -4 2 7.53 0.54
 4 -4 2 7.59 0.43
 4 -4 2 7.46 0.52
 -4 4 -3 55.75 1.35
 -4 4 -3 59.04 1.23
 -4 4 -3 55.79 1.72
 -4 4 -3 57.13 1.19
 -4 4 -3 58.01 1.36
 4 -4 3 56.22 1.35
 4 -4 3 57.56 1.2
 4 -4 3 56.97 1.73
 4 -4 3 58.36 1.33
 4 -4 3 57.37 1.27
 4 -4 3 56.8 1.35
 -4 4 -4 5.6 0.54
 -4 4 -4 6.21 0.6
 -4 4 -4 4.8 0.59
 -4 4 -4 4.66 0.64
 4 -4 4 5.23 0.62
 4 -4 4 5.06 0.55
 4 -4 4 6.51 0.61
 4 -4 4 4.42 0.34
 4 -4 4 6.05 0.64
 4 -4 4 4.67 0.48
 -4 4 -5 13.73 1.17
 -4 4 -5 15.27 0.94
 -4 4 -5 15.82 0.84
 -4 4 -5 16.13 0.96
 -4 4 -5 14.93 0.82
 4 -4 5 14.81 0.9
 4 -4 5 14.81 0.74
 4 -4 5 13.28 0.82
 4 -4 5 14.9 0.87
 4 -4 5 15.44 0.78
 4 -4 5 16.57 0.88
 -4 4 -6 4.18 0.67
 -4 4 -6 3.25 0.63
 -4 4 -6 2.2 0.64
 -4 4 -6 2.37 0.6
 -4 4 -6 3.34 0.57
 4 -4 6 3.73 0.56
 4 -4 6 4.32 0.65
 4 -4 6 3.73 0.63
 4 -4 6 3.99 0.62
 4 -4 6 4.28 0.59
 4 -4 6 4.04 0.53
 -4 4 -7 3.86 0.66
 -4 4 -7 3.78 0.79
 -4 4 -7 2.72 0.69
 -4 4 -7 0.95 0.73
 -4 4 -7 3.26 0.74
 4 -4 7 2.69 0.7
 4 -4 7 3.26 0.71
 4 -4 7 2.22 0.7
 4 -4 7 3.33 0.67
 4 -4 7 2.95 0.64
 4 -4 7 2.46 0.61
 -4 4 -8 2.17 0.78
 -4 4 -8 2.24 0.95
 -4 4 -8 0.63 0.91
 -4 4 -8 3.06 0.88
 4 -4 8 4.14 0.98
 4 -4 8 2.06 0.77
 4 -4 8 1.77 0.91
 4 -4 8 2.07 0.95
 4 -4 8 2.73 0.82
 -3 4 9 2.58 1.08
 3 -4 -9 2.24 0.91
 3 -4 -9 -0.35 1.32
 3 -4 -9 1.03 0.96
 -3 4 8 -0.12 0.72
 -3 4 8 -1.05 0.61
 -3 4 8 -0.59 0.52
 -3 4 8 0.82 0.67
 3 -4 -8 0.07 0.96
 3 -4 -8 2.65 0.71
 3 -4 -8 1.54 0.67
 3 -4 -8 0.84 0.67
 3 -4 -8 -0.09 0.58
 -3 4 7 3.16 0.64
 -3 4 7 1.52 0.58
 -3 4 7 2.96 0.59
 -3 4 7 2.97 0.63
 3 -4 -7 1.9 0.55
 3 -4 -7 2.74 0.9
 3 -4 -7 3.61 0.64
 3 -4 -7 2.36 0.55
 3 -4 -7 2.83 0.54
 -3 4 6 2.08 0.48
 -3 4 6 1.06 0.45
 -3 4 6 1.87 0.51
 -3 4 6 1.79 0.49
 3 -4 -6 1.28 0.4
 3 -4 -6 1.96 0.49
 3 -4 -6 0.92 0.49
 3 -4 -6 1.52 0.48
 -3 4 5 1.61 0.42
 -3 4 5 1.88 0.39
 -3 4 5 2.01 0.46
 -3 4 5 1.98 0.46
 3 -4 -5 1.8 0.41
 3 -4 -5 1.82 0.33
 3 -4 -5 2.69 0.45
 -3 4 4 43.41 1.2
 -3 4 4 45.01 1.19
 3 -4 -4 44.97 1.19
 3 -4 -4 43.58 1.2
 -3 4 3 13.31 0.63
 -3 4 3 14.39 0.46
 -3 4 3 14.49 0.36
 3 -4 -3 13.98 0.72
 3 -4 -3 14.98 0.68
 -3 4 2 6.03 0.46
 3 -4 -2 6.74 0.37
 3 -4 -2 6.19 0.47
 3 -4 -2 6.21 0.5
 -3 4 1 36.19 0.86
 -3 4 1 37.44 0.87
 -3 4 1 35.8 0.66
 3 -4 -1 37.65 0.89
 3 -4 -1 35.7 0.98
 3 -4 -1 37.32 0.66
 -3 4 0 40.5 0.92
 -3 4 0 40.08 1.08
 -3 4 0 40.5 0.81
 -3 4 0 38.96 0.9
 3 -4 0 40.33 0.68
 3 -4 0 39.04 0.93
 3 -4 0 39.35 1.08
 3 -4 0 40.25 0.91
 3 -4 0 40.66 0.81
 3 -4 0 40.13 0.79
 -3 4 -1 11.2 0.54
 -3 4 -1 10.8 0.58
 -3 4 -1 11.23 0.71
 -3 4 -1 10.93 0.42
 -3 4 -1 10.68 0.43
 3 -4 1 11.1 0.44
 3 -4 1 10.89 0.58
 3 -4 1 10.83 0.58
 3 -4 1 11.48 0.72
 -3 4 -2 0.35 0.24
 -3 4 -2 -0.06 0.22
 -3 4 -2 0.28 0.35
 -3 4 -2 0.18 0.19
 -3 4 -2 -0.12 0.3
 -3 4 -2 0.17 0.31
 3 -4 2 0.31 0.2
 3 -4 2 0.05 0.24
 3 -4 2 0.13 0.28
 3 -4 2 0.4 0.29
 3 -4 2 0.37 0.36
 3 -4 2 -0.3 0.29
 -3 4 -3 -0.15 0.23
 -3 4 -3 0.11 0.33
 -3 4 -3 -0.27 0.32
 -3 4 -3 -0.22 0.37
 -3 4 -3 0.14 0.25
 3 -4 3 0.18 0.32
 3 -4 3 -0.12 0.26
 3 -4 3 -0.43 0.22
 3 -4 3 0.22 0.42
 3 -4 3 0.09 0.24
 3 -4 3 -0.18 0.33
 3 -4 3 0.03 0.27
 -3 4 -4 5.34 0.64
 -3 4 -4 5.24 0.6
 -3 4 -4 4.94 0.51
 -3 4 -4 5.64 0.64
 -3 4 -4 4.83 0.58
 -3 4 -4 4.88 0.65
 3 -4 4 5.81 0.56
 3 -4 4 5 0.59
 3 -4 4 4.82 0.5
 3 -4 4 5.86 0.57
 3 -4 4 4.92 0.49
 3 -4 4 4.66 0.22
 3 -4 4 4.9 0.49
 -3 4 -5 16.43 0.89
 -3 4 -5 15.8 0.82
 -3 4 -5 15.67 0.92
 -3 4 -5 15.35 0.88
 -3 4 -5 14.21 1.08
 3 -4 5 15.81 0.85
 3 -4 5 14.16 0.78
 3 -4 5 14.45 0.75
 3 -4 5 14.52 0.87
 3 -4 5 16.12 0.82
 3 -4 5 15.45 0.76
 -3 4 -6 -0.25 0.44
 -3 4 -6 -0.4 0.51
 -3 4 -6 0.44 0.48
 -3 4 -6 -0.11 0.5
 -3 4 -6 -0.48 0.49
 3 -4 6 0.54 0.51
 3 -4 6 -0.26 0.46
 3 -4 6 0.21 0.46
 3 -4 6 -0.34 0.44
 3 -4 6 0.95 0.49
 3 -4 6 0.1 0.44
 -3 4 -7 -1.1 0.64
 -3 4 -7 0.81 0.64
 -3 4 -7 1.18 0.6
 -3 4 -7 0.23 0.57
 -3 4 -7 0.24 0.65
 3 -4 7 0.06 0.55
 3 -4 7 0.4 0.59
 3 -4 7 -0.67 0.53
 3 -4 7 0.25 0.61
 3 -4 7 0.45 0.64
 -3 4 -8 -1.44 0.65
 -3 4 -8 0.98 0.85
 -3 4 -8 0.09 0.83
 -3 4 -8 1.27 0.82
 -3 4 -8 1.02 0.85
 -3 4 -8 0.23 0.44
 -3 4 -8 -1.63 0.77
 3 -4 8 -0.54 0.7
 3 -4 8 0.14 0.84
 3 -4 8 -0.2 0.74
 3 -4 8 -0.41 0.81
 3 -4 8 0.49 0.79
 -2 4 9 1.89 1.17
 -2 4 9 -1.73 0.85
 2 -4 -9 0.94 0.87
 2 -4 -9 -1.02 1.27
 -2 4 8 -0.13 0.57
 -2 4 8 1.3 0.78
 2 -4 -8 0.68 0.67
 2 -4 -8 -0.99 0.61
 2 -4 -8 0.41 0.64
 2 -4 -8 -1.22 0.63
 2 -4 -8 0.9 1.03
 -2 4 7 0.02 0.52
 -2 4 7 -0.88 0.49
 -2 4 7 -0.07 0.47
 -2 4 7 -0.45 0.53
 2 -4 -7 0.54 0.47
 2 -4 -7 -0.16 0.45
 2 -4 -7 -0.15 0.49
 2 -4 -7 1.56 0.5
 2 -4 -7 -0.31 0.72
 -2 4 6 14.33 0.9
 -2 4 6 14.94 0.93
 -2 4 6 14.8 0.95
 -2 4 6 14.43 0.81
 2 -4 -6 14.34 0.95
 2 -4 -6 15.29 0.86
 2 -4 -6 15.01 0.76
 2 -4 -6 15.06 0.88
 -2 4 5 29.18 1.08
 -2 4 5 29.48 1.01
 -2 4 5 29.19 0.93
 -2 4 5 30.95 1.03
 2 -4 -5 28.98 1.04
 2 -4 -5 30.01 0.82
 2 -4 -5 30.13 1.07
 2 -4 -5 30.4 1.03
 -2 4 4 8.72 0.63
 -2 4 4 9.62 0.63
 -2 4 4 10.14 0.65
 -2 4 4 9.28 0.53
 2 -4 -4 9.29 0.66
 2 -4 -4 8.94 0.46
 2 -4 -4 9.8 0.69
 -2 4 3 32.67 0.93
 -2 4 3 31.93 0.92
 2 -4 -3 32.68 0.67
 2 -4 -3 33.3 0.93
 2 -4 -3 31.4 0.61
 2 -4 -3 31.83 0.92
 -2 4 2 103.47 1.55
 -2 4 2 104.94 1.59
 -2 4 2 101.74 1.84
 2 -4 -2 99.97 1.83
 2 -4 -2 104.36 1.89
 -2 4 1 50.94 1.02
 2 -4 -1 49.49 1
 2 -4 -1 49.52 0.83
 -2 4 0 14.37 0.52
 -2 4 0 14.42 0.53
 -2 4 0 14.48 0.38
 2 -4 0 14.59 0.64
 2 -4 0 13.49 0.45
 2 -4 0 13.79 0.49
 2 -4 0 14.31 0.5
 -2 4 -1 23.93 0.85
 -2 4 -1 24.28 0.55
 -2 4 -1 24.55 0.67
 -2 4 -1 24.24 0.5
 -2 4 -1 25.13 0.69
 -2 4 -1 24.55 0.66
 2 -4 1 26.06 0.69
 2 -4 1 23.42 0.54
 2 -4 1 24.81 0.86
 2 -4 1 23.75 0.69
 -2 4 -2 7.51 0.66
 -2 4 -2 8.52 0.35
 -2 4 -2 8.17 0.47
 -2 4 -2 8.08 0.53
 -2 4 -2 8.21 0.52
 2 -4 2 8.68 0.75
 2 -4 2 8.68 0.52
 2 -4 2 8.35 0.53
 2 -4 2 7.17 0.52
 2 -4 2 8.48 0.45
 2 -4 2 7.71 0.34
 2 -4 2 8.14 0.46
 -2 4 -3 17.72 0.76
 -2 4 -3 18.1 0.72
 -2 4 -3 19.01 0.75
 -2 4 -3 18.71 0.97
 -2 4 -3 18.12 0.58
 -2 4 -3 18.13 0.7
 2 -4 3 17.73 0.65
 2 -4 3 18.55 0.72
 2 -4 3 18.24 0.66
 2 -4 3 19.05 0.57
 2 -4 3 20.06 1.02
 2 -4 3 17.88 0.69
 2 -4 3 18.37 0.72
 -2 4 -4 24.26 1.19
 -2 4 -4 24.25 0.88
 -2 4 -4 25.51 0.93
 -2 4 -4 25.85 0.95
 -2 4 -4 24.67 0.87
 2 -4 4 25.88 0.92
 2 -4 4 25.21 0.76
 2 -4 4 24.06 0.89
 2 -4 4 26.1 0.9
 2 -4 4 24.58 0.84
 2 -4 4 24.44 0.81
 -2 4 -5 18.7 0.95
 -2 4 -5 20.1 0.87
 -2 4 -5 20.54 1.24
 -2 4 -5 20.11 0.94
 -2 4 -5 20.5 0.9
 2 -4 5 20.03 0.82
 2 -4 5 19.33 0.87
 2 -4 5 20.56 0.87
 2 -4 5 20.32 0.84
 2 -4 5 20.41 0.86
 2 -4 5 21.4 0.94
 -2 4 -6 -0.43 0.42
 -2 4 -6 0.71 0.48
 -2 4 -6 0.81 0.53
 -2 4 -6 0.15 0.6
 -2 4 -6 1.34 0.47
 2 -4 6 0.92 0.48
 2 -4 6 0.67 0.49
 2 -4 6 1.12 0.47
 2 -4 6 1.05 0.48
 2 -4 6 0.77 0.45
 2 -4 6 1.34 0.48
 -2 4 -7 0.19 0.59
 -2 4 -7 -0.38 0.57
 -2 4 -7 -0.06 0.56
 -2 4 -7 -1.32 0.58
 -2 4 -7 -0.6 0.51
 -2 4 -7 -0.82 0.56
 2 -4 7 0.45 0.61
 2 -4 7 0.56 0.57
 2 -4 7 0.2 0.53
 2 -4 7 0.48 0.59
 2 -4 7 -0.42 0.58
 -2 4 -8 6.66 0.89
 -2 4 -8 9.46 1.14
 -2 4 -8 3.79 1.07
 -2 4 -8 5.73 0.9
 -2 4 -8 5.11 0.89
 2 -4 8 7.35 0.97
 2 -4 8 7.05 0.92
 2 -4 8 5.96 0.84
 2 -4 8 8.13 1.01
 2 -4 8 7.96 1
 2 -4 9 3.76 1.11
 -1 4 9 -2.01 0.8
 -1 4 9 1.24 1.19
 1 -4 -9 -1.82 1.3
 1 -4 -9 1.65 0.91
 -1 4 8 25.3 1.33
 -1 4 8 28.63 1.52
 -1 4 8 29.82 1.36
 -1 4 8 29.37 1.51
 1 -4 -8 25.06 2.07
 1 -4 -8 30.09 1.52
 1 -4 -8 26.83 1.31
 1 -4 -8 28.08 1.33
 1 -4 -8 27.27 1.29
 -1 4 7 6.89 0.77
 -1 4 7 8.05 0.85
 -1 4 7 7.97 0.83
 1 -4 -7 7.54 0.83
 1 -4 -7 5.84 0.72
 1 -4 -7 6.13 0.98
 1 -4 -7 6.51 0.72
 1 -4 -7 6.21 0.72
 -1 4 6 1.53 0.49
 -1 4 6 -0.58 0.38
 -1 4 6 0.75 0.43
 1 -4 -6 0.62 0.45
 1 -4 -6 0.27 0.38
 1 -4 -6 0.26 0.43
 1 -4 -6 -0.51 0.38
 -1 4 5 22.14 0.77
 -1 4 5 21.81 0.91
 -1 4 5 25.31 0.94
 -1 4 5 26.1 1
 1 -4 -5 24.65 0.95
 1 -4 -5 24.06 0.95
 1 -4 -5 23.75 0.75
 1 -4 -5 24.16 0.94
 -1 4 4 327.52 5.32
 -1 4 4 318.84 5.68
 -1 4 4 329.7 5.37
 -1 4 4 328.21 5.33
 1 -4 -4 329.79 4.83
 1 -4 -4 324.56 5.32
 1 -4 -4 328.98 5.36
 -1 4 3 12.47 0.6
 -1 4 3 11.5 0.64
 -1 4 3 12.43 0.6
 1 -4 -3 13.16 0.41
 1 -4 -3 13.07 0.65
 1 -4 -3 12.41 0.6
 -1 4 2 94.67 1.71
 -1 4 2 92.05 1.69
 1 -4 -2 94.38 1.41
 1 -4 -2 95.46 1.71
 1 -4 -2 94.14 1.73
 1 -4 -2 94.22 1.61
 -1 4 1 0.06 0.16
 -1 4 1 -0.1 0.24
 1 -4 -1 0.17 0.17
 1 -4 -1 0.16 0.22
 -1 4 0 142.52 2.42
 -1 4 0 146.61 2.86
 -1 4 0 142.92 2.24
 -1 4 0 143.02 2.24
 -1 4 0 128.6 2.08
 1 -4 0 143.89 2.23
 1 -4 0 143.32 2.43
 1 -4 0 142.16 2.23
 1 -4 0 144.9 2.85
 -1 4 -1 168.73 2.64
 -1 4 -1 163.93 3.37
 -1 4 -1 170.05 2.65
 -1 4 -1 165.28 2.81
 1 -4 1 164.29 2.81
 1 -4 1 173.88 3.4
 1 -4 1 167.31 2.5
 1 -4 1 163.28 2.63
 1 -4 1 168.69 2.64
 1 -4 1 167.18 2.49
 -1 4 -2 53.74 1.13
 -1 4 -2 53.1 1.08
 -1 4 -2 51.42 1.41
 -1 4 -2 51.33 1.22
 -1 4 -2 52.04 1.08
 -1 4 -2 52.76 0.89
 -1 4 -2 52.29 1.12
 1 -4 2 53.23 1.12
 1 -4 2 51.86 1.08
 1 -4 2 56.07 1.46
 1 -4 2 52.17 0.93
 1 -4 2 53.02 1.12
 1 -4 2 52.48 1.08
 -1 4 -3 59.12 1.41
 -1 4 -3 58.89 1.3
 -1 4 -3 56.85 1.64
 -1 4 -3 59.92 1.27
 -1 4 -3 59.15 1.28
 1 -4 3 58.81 1.13
 1 -4 3 58.51 1.3
 1 -4 3 57.54 1.62
 1 -4 3 58.89 0.96
 1 -4 3 57.22 1.26
 1 -4 3 59.52 1.29
 1 -4 3 58.54 1.27
 -1 4 -4 45.07 1.21
 -1 4 -4 44.39 1.16
 -1 4 -4 43.45 1.13
 -1 4 -4 42.82 1.22
 -1 4 -4 43.63 1.52
 1 -4 4 43.51 1.14
 1 -4 4 42.05 1.02
 1 -4 4 43.51 1.14
 1 -4 4 43.98 1.16
 1 -4 4 43.57 1.18
 -1 4 -5 2.05 0.46
 -1 4 -5 1.73 0.51
 -1 4 -5 2.02 0.47
 -1 4 -5 1.87 0.44
 -1 4 -5 1.77 0.41
 1 -4 5 1.9 0.42
 1 -4 5 2.2 0.43
 1 -4 5 1.94 0.4
 1 -4 5 2.64 0.45
 1 -4 5 2.37 0.42
 -1 4 -6 8.61 0.77
 -1 4 -6 10.36 1.15
 -1 4 -6 7.42 0.86
 -1 4 -6 10.99 0.89
 -1 4 -6 8.6 0.76
 -1 4 -6 7.69 0.79
 1 -4 6 9.11 0.82
 1 -4 6 10.36 0.78
 1 -4 6 8.57 0.84
 1 -4 6 8.78 0.82
 1 -4 6 10.27 0.85
 -1 4 -7 0.82 0.54
 -1 4 -7 1.43 0.59
 -1 4 -7 0.91 0.59
 -1 4 -7 2.04 0.66
 -1 4 -7 0.73 0.72
 -1 4 -7 -0.11 0.56
 1 -4 7 0.62 0.63
 1 -4 7 1.04 0.62
 1 -4 7 1.73 0.59
 1 -4 7 0.93 0.58
 1 -4 7 1.49 0.61
 -1 4 -8 2.51 0.76
 -1 4 -8 1.36 0.74
 -1 4 -8 1.86 0.78
 -1 4 -8 1.59 0.78
 -1 4 -8 -0.74 0.87
 1 -4 8 2.12 0.79
 1 -4 8 1.53 0.7
 1 -4 8 2.22 0.84
 1 -4 8 1 0.73
 1 -4 8 2.23 0.88
 -1 4 -9 -0.02 1.03
 -1 4 -9 0.07 1.04
 1 -4 9 -0.05 1.11
 1 -4 9 2.23 1.1
 0 4 9 1.69 1.2
 0 4 9 -0.95 0.96
 0 -4 -9 -0.5 0.89
 0 -4 -9 -0.21 1
 0 -4 -9 -2.68 1.16
 0 4 8 1.87 0.88
 0 4 8 0.95 0.58
 0 4 8 2.36 0.79
 0 4 8 4.7 0.71
 0 -4 -8 2.63 0.65
 0 -4 -8 1.13 0.98
 0 -4 -8 1.56 0.79
 0 -4 -8 2.42 0.71
 0 -4 -8 2.37 0.7
 0 4 7 -0.35 0.58
 0 4 7 0.38 0.49
 0 4 7 0.58 0.48
 0 4 7 1.16 0.62
 0 -4 -7 0.36 0.59
 0 -4 -7 0.56 0.53
 0 -4 -7 -0.17 0.5
 0 -4 -7 -0.17 0.68
 0 -4 -7 0.76 0.5
 0 4 6 7.27 0.44
 0 4 6 7.26 0.8
 0 4 6 7.54 0.69
 0 4 6 7.75 0.86
 0 -4 -6 7.91 0.81
 0 -4 -6 6.28 0.7
 0 -4 -6 7.21 0.67
 0 -4 -6 7.73 0.74
 0 -4 -6 6.85 0.45
 0 4 5 0.49 0.22
 0 4 5 1.27 0.43
 0 4 5 0.35 0.36
 0 4 5 0.56 0.37
 0 -4 -5 0.72 0.38
 0 -4 -5 0.14 0.36
 0 -4 -5 1.44 0.44
 0 -4 -5 0.29 0.29
 0 4 4 3.21 0.41
 0 4 4 3.62 0.49
 0 4 4 4.66 0.52
 0 4 4 3.16 0.35
 0 -4 -4 3.17 0.46
 0 -4 -4 3.83 0.46
 0 -4 -4 3.19 0.4
 0 4 3 83.12 1.47
 0 4 3 82.05 1.51
 0 4 3 81.8 1.61
 0 4 3 81.57 1.62
 0 4 3 80.15 1.62
 0 -4 -3 81.27 1.61
 0 -4 -3 83.28 1.64
 0 -4 -3 83.69 1.64
 0 4 2 88.77 1.65
 0 4 2 89.39 1.63
 0 4 2 89.73 1.64
 0 4 2 91.62 1.59
 0 -4 -2 92.1 1.64
 0 -4 -2 91.47 1.59
 0 -4 -2 90.79 1.64
 0 -4 -2 89.9 1.64
 0 4 1 114.21 1.87
 0 4 1 110.24 1.78
 0 4 1 113.22 1.85
 0 -4 -1 113.21 1.93
 0 -4 -1 114.69 1.85
 0 -4 -1 112.85 1.86
 0 4 0 453.06 6.44
 0 4 0 434.93 6.77
 0 4 0 448.99 6.71
 0 4 0 433.86 6.5
 0 4 0 419.99 7.29
 0 4 0 446.49 7.65
 0 4 0 443.53 6.69
 0 -4 0 447.73 6.78
 0 -4 0 438.35 6.82
 0 -4 0 439.23 6.65
 0 -4 0 445.46 6.44
 0 -4 0 461.55 6.69
 0 -4 0 436.92 7.38
 0 -4 0 438.11 6.48
 0 4 -1 113.36 1.77
 0 4 -1 111.02 1.96
 0 4 -1 110.89 1.76
 0 4 -1 112.89 1.8
 0 4 -1 111.28 2.32
 0 4 -1 108.07 1.75
 0 4 -1 113.39 2.1
 0 -4 1 111.87 1.76
 0 -4 1 111.66 1.82
 0 -4 1 110.88 1.87
 0 -4 1 112.6 1.96
 0 -4 1 109.37 2.1
 0 -4 1 114.99 2.33
 0 -4 1 111.08 1.76
 0 4 -2 89.52 1.57
 0 4 -2 88.81 2.03
 0 4 -2 90.12 1.83
 0 4 -2 89.21 1.66
 0 4 -2 90.79 1.58
 0 4 -2 91.48 1.54
 0 -4 2 92.33 1.58
 0 -4 2 93.48 2.06
 0 -4 2 91.04 1.86
 0 -4 2 90.03 1.71
 0 -4 2 88.94 1.5
 0 -4 2 88.97 1.66
 0 -4 2 87.98 1.57
 0 4 -3 81.73 1.64
 0 4 -3 81.04 1.77
 0 4 -3 80.96 1.55
 0 4 -3 79.65 2
 0 4 -3 81.04 1.54
 0 -4 3 79.5 1.76
 0 -4 3 80.46 1.65
 0 -4 3 81.66 1.55
 0 -4 3 80.97 1.99
 0 -4 3 80.84 1.45
 0 -4 3 84.56 1.66
 0 -4 3 80.62 1.55
 0 4 -4 4.3 0.46
 0 4 -4 4.25 0.58
 0 4 -4 4 0.49
 0 4 -4 3.87 0.55
 0 4 -4 4.42 0.54
 0 4 -4 3.62 0.43
 0 -4 4 3.46 0.45
 0 -4 4 4.76 0.53
 0 -4 4 4.58 0.52
 0 -4 4 3.26 0.36
 0 -4 4 3.79 0.43
 0 4 -5 1.25 0.41
 0 4 -5 1.04 0.41
 0 4 -5 0.59 0.37
 0 4 -5 0.96 0.39
 0 4 -5 1.37 0.41
 0 4 -5 0.06 0.43
 0 -4 5 0.83 0.4
 0 -4 5 0.37 0.39
 0 -4 5 1.07 0.39
 0 -4 5 0.61 0.36
 0 4 -6 6.74 0.69
 0 4 -6 7.1 0.75
 0 4 -6 9.09 0.89
 0 4 -6 6.76 0.8
 0 4 -6 6.19 0.8
 0 4 -6 6.73 0.79
 0 -4 6 8.75 0.8
 0 -4 6 7.49 0.8
 0 -4 6 7 0.85
 0 -4 6 6.53 0.77
 0 4 -7 0.65 0.55
 0 4 -7 -0.36 0.71
 0 4 -7 0.27 0.47
 0 4 -7 0.49 0.58
 0 4 -7 0.55 0.56
 0 -4 7 0.6 0.51
 0 -4 7 -0.23 0.61
 0 -4 7 0.45 0.54
 0 -4 7 0.28 0.58
 0 4 -8 1.5 0.79
 0 4 -8 2.4 0.73
 0 4 -8 1.8 0.82
 0 4 -8 2.37 0.86
 0 4 -8 0.75 0.96
 0 -4 8 2.13 0.86
 0 -4 8 1.42 0.72
 0 -4 8 2.31 0.84
 0 -4 8 3.24 0.85
 0 -4 8 1.82 0.69
 0 4 -9 1.61 0.96
 0 4 -9 1.16 0.99
 0 4 -9 -0.8 0.94
 0 4 -9 1.57 0.9
 0 4 -9 -1.05 1.26
 0 -4 9 1.9 1.18
 0 -4 9 -0.26 1.01
 0 -4 9 2.39 1.13
 1 4 9 -1.45 1.01
 1 4 9 -0.78 0.93
 1 4 9 0.48 1.1
 -1 -4 -9 0.19 1.12
 -1 -4 -9 -0.4 0.93
 1 4 8 2 0.87
 1 4 8 2.27 0.85
 1 4 8 2.31 0.61
 1 4 8 1.23 0.65
 -1 -4 -8 2.23 0.86
 -1 -4 -8 2.08 0.69
 -1 -4 -8 2.64 0.73
 -1 -4 -8 1.52 0.95
 -1 -4 -8 2.26 0.69
 1 4 7 1.31 0.58
 1 4 7 1.3 0.6
 1 4 7 1.28 0.64
 1 4 7 -0.26 0.47
 1 4 7 1.29 0.37
 -1 -4 -7 0.93 0.54
 -1 -4 -7 1.24 0.64
 -1 -4 -7 1.95 0.57
 -1 -4 -7 1.17 0.76
 -1 -4 -7 0.82 0.51
 1 4 6 9.4 0.8
 1 4 6 10.87 0.88
 1 4 6 9.94 0.83
 1 4 6 9.51 0.61
 1 4 6 9.51 0.9
 -1 -4 -6 8.99 0.88
 -1 -4 -6 7.63 0.72
 -1 -4 -6 10.4 1.29
 -1 -4 -6 9 0.45
 -1 -4 -6 10.34 0.85
 1 4 5 2.38 0.44
 1 4 5 1.66 0.43
 1 4 5 1.89 0.31
 1 4 5 1.53 0.44
 1 4 5 2.25 0.43
 -1 -4 -5 1.81 0.44
 -1 -4 -5 1.74 0.43
 -1 -4 -5 1.71 0.26
 -1 -4 -5 2.21 0.47
 1 4 4 43.65 1.14
 1 4 4 43.05 1.14
 1 4 4 44.06 1.17
 1 4 4 42.51 1.16
 1 4 4 44.33 0.99
 -1 -4 -4 43.4 1.15
 -1 -4 -4 44.72 1.18
 -1 -4 -4 42.01 0.91
 -1 -4 -4 44.42 1.2
 -1 -4 -4 42.81 1.13
 1 4 3 58.31 1.25
 1 4 3 58.87 1.3
 1 4 3 59.14 1.28
 1 4 3 58.37 1.3
 1 4 3 59.16 1.19
 -1 -4 -3 58.84 1.3
 -1 -4 -3 57.59 1.27
 -1 -4 -3 58.96 1.26
 -1 -4 -3 58.52 1.31
 1 4 2 51.86 1.1
 1 4 2 52.69 1.05
 1 4 2 53.9 1.07
 1 4 2 51.18 1.09
 1 4 2 52.14 1.07
 -1 -4 -2 52.38 1.05
 -1 -4 -2 51.56 1.09
 -1 -4 -2 53.58 1.12
 -1 -4 -2 51.33 1.1
 1 4 1 168.82 2.69
 1 4 1 171.09 2.81
 1 4 1 163.85 2.59
 1 4 1 169.71 2.65
 -1 -4 -1 167.79 2.64
 -1 -4 -1 167.6 2.81
 -1 -4 -1 166.25 2.68
 -1 -4 -1 172.03 2.85
 -1 -4 -1 163.85 2.59
 -1 -4 -1 166.63 2.64
 1 4 0 143.71 2.39
 1 4 0 143.37 2.19
 1 4 0 142.33 2.54
 1 4 0 138.76 2.24
 1 4 0 141.72 2.21
 1 4 0 147.76 2.16
 1 4 0 147.41 2.49
 1 4 0 142.9 2.41
 -1 -4 0 143.23 2.18
 -1 -4 0 141.01 2.12
 -1 -4 0 143.72 2.39
 -1 -4 0 144.15 2.24
 -1 -4 0 141.66 2.21
 -1 -4 0 141.19 2.48
 -1 -4 0 142.88 2.42
 -1 -4 0 141.74 2.37
 -1 -4 0 147.91 2.15
 -1 -4 0 143.44 2.54
 1 4 -1 0.04 0.23
 1 4 -1 -0.1 0.22
 1 4 -1 0.21 0.27
 1 4 -1 -0.13 0.22
 1 4 -1 0.15 0.11
 1 4 -1 0.31 0.23
 1 4 -1 0.21 0.13
 1 4 -1 0.11 0.22
 1 4 -1 0.18 0.24
 1 4 -1 -0.19 0.21
 -1 -4 1 0.11 0.11
 -1 -4 1 0.19 0.23
 -1 -4 1 0.39 0.24
 -1 -4 1 -0.21 0.2
 -1 -4 1 0.3 0.25
 -1 -4 1 0.06 0.11
 -1 -4 1 0.18 0.23
 -1 -4 1 0.2 0.23
 -1 -4 1 -0.06 0.26
 -1 -4 1 0.21 0.21
 -1 -4 1 -0.11 0.2
 1 4 -2 93.88 1.62
 1 4 -2 97.66 1.63
 1 4 -2 95.68 1.93
 1 4 -2 93.38 1.6
 1 4 -2 93.35 2.07
 1 4 -2 95.68 1.74
 1 4 -2 92.09 1.59
 1 4 -2 94.37 1.67
 -1 -4 2 96.07 2.07
 -1 -4 2 93.03 1.93
 -1 -4 2 93.95 1.72
 -1 -4 2 94.31 1.62
 -1 -4 2 95.67 1.6
 -1 -4 2 92.78 1.59
 1 4 -3 12.44 0.59
 1 4 -3 12.58 0.55
 1 4 -3 12.02 0.74
 1 4 -3 12.69 0.68
 1 4 -3 11.45 0.53
 1 4 -3 11.76 0.65
 -1 -4 3 12.54 0.62
 -1 -4 3 12.4 0.54
 -1 -4 3 13.07 0.77
 -1 -4 3 12.77 0.68
 1 4 -4 328.46 5.06
 1 4 -4 331.84 5.98
 1 4 -4 327.45 5.26
 1 4 -4 338.38 5.44
 1 4 -4 329.08 5.27
 1 4 -4 330.39 6.66
 -1 -4 4 321.92 5.41
 -1 -4 4 325.91 5.26
 -1 -4 4 328.8 5.99
 1 4 -5 24.17 0.99
 1 4 -5 23.79 0.92
 1 4 -5 23.5 0.87
 1 4 -5 22.9 1.2
 1 4 -5 23.64 0.88
 -1 -4 5 24.85 0.86
 -1 -4 5 23.78 1.02
 -1 -4 5 21.59 0.92
 -1 -4 5 23.62 0.91
 1 4 -6 0.62 0.44
 1 4 -6 -0.28 0.55
 1 4 -6 0.02 0.41
 1 4 -6 0.09 0.48
 1 4 -6 0.98 0.46
 -1 -4 6 0.39 0.45
 -1 -4 6 0.47 0.49
 -1 -4 6 -0.33 0.4
 -1 -4 6 0.03 0.45
 1 4 -7 6.04 0.68
 1 4 -7 5.3 0.88
 1 4 -7 6.33 0.77
 1 4 -7 8.74 0.79
 1 4 -7 6.11 0.79
 -1 -4 7 7.92 0.89
 -1 -4 7 5.33 0.67
 -1 -4 7 7.92 0.98
 -1 -4 7 5.49 0.73
 1 4 -8 26.62 1.44
 1 4 -8 27.06 2.11
 1 4 -8 27.9 1.4
 1 4 -8 26.23 1.53
 1 4 -8 28.38 1.53
 -1 -4 8 24.92 1.62
 -1 -4 8 28.93 1.32
 -1 -4 8 30.09 1.51
 -1 -4 8 27.7 1.55
 1 4 -9 0.09 1.35
 1 4 -9 -0.47 1.05
 1 4 -9 0.48 0.98
 1 4 -9 1.71 0.96
 1 4 -9 -0.99 1.06
 -1 -4 9 0.22 1.11
 -1 -4 9 1.77 1.11
 -1 -4 9 0.93 1.13
 2 4 8 6.95 0.79
 2 4 8 9.91 1.04
 2 4 8 8.05 1.07
 2 4 8 8.5 0.89
 2 4 8 7.45 1.03
 2 4 8 6.85 0.8
 -2 -4 -8 6.63 0.81
 -2 -4 -8 6.73 1.03
 -2 -4 -8 5.06 0.98
 -2 -4 -8 6.58 0.81
 -2 -4 -8 8.01 0.89
 2 4 7 0.46 0.66
 2 4 7 -0.2 0.43
 2 4 7 -0.32 0.47
 2 4 7 0.5 0.52
 2 4 7 -0.76 0.64
 -2 -4 -7 0.39 0.61
 -2 -4 -7 0.41 0.52
 -2 -4 -7 0.52 0.5
 -2 -4 -7 1.26 0.66
 2 4 6 0.84 0.39
 2 4 6 0 0.43
 2 4 6 0.79 0.48
 2 4 6 0.45 0.49
 2 4 6 0.41 0.47
 -2 -4 -6 1.38 0.52
 -2 -4 -6 1.45 0.49
 -2 -4 -6 1.61 0.69
 -2 -4 -6 0.22 0.51
 2 4 5 20.42 0.77
 2 4 5 20.3 0.93
 2 4 5 19.19 0.88
 2 4 5 19.67 0.92
 2 4 5 19.65 0.88
 -2 -4 -5 19.43 0.89
 -2 -4 -5 20.33 0.91
 -2 -4 -5 20.06 0.95
 -2 -4 -5 19.58 0.6
 -2 -4 -5 20.5 0.9
 2 4 4 24.6 0.87
 2 4 4 24.23 0.78
 2 4 4 24.32 0.86
 2 4 4 26.38 0.88
 2 4 4 24.22 0.92
 -2 -4 -4 25.88 0.92
 -2 -4 -4 24.53 0.84
 -2 -4 -4 25.44 0.64
 -2 -4 -4 23.82 0.66
 -2 -4 -4 25.33 0.93
 -2 -4 -4 26.05 0.9
 2 4 3 18.82 0.67
 2 4 3 18.59 0.67
 2 4 3 19.3 0.73
 2 4 3 18.33 0.71
 2 4 3 19.96 0.74
 -2 -4 -3 18.24 0.71
 -2 -4 -3 17.96 0.65
 -2 -4 -3 17.78 0.46
 -2 -4 -3 18.19 0.7
 -2 -4 -3 17.44 0.56
 -2 -4 -3 17.3 0.69
 2 4 2 7.8 0.53
 2 4 2 8.4 0.49
 2 4 2 7.85 0.52
 2 4 2 7.67 0.48
 2 4 2 8.59 0.49
 2 4 2 7.96 0.42
 -2 -4 -2 7.81 0.44
 -2 -4 -2 8.5 0.53
 -2 -4 -2 8.13 0.51
 -2 -4 -2 8.05 0.47
 -2 -4 -2 8.04 0.52
 -2 -4 -2 8.05 0.41
 2 4 1 24.46 0.51
 2 4 1 24.05 0.7
 2 4 1 23.81 0.62
 2 4 1 23.4 0.68
 2 4 1 23.1 0.65
 2 4 1 24.08 0.65
 2 4 1 23.91 0.61
 -2 -4 -1 23.77 0.67
 -2 -4 -1 23.76 0.61
 -2 -4 -1 24.89 0.5
 -2 -4 -1 23.24 0.65
 -2 -4 -1 24.34 0.65
 -2 -4 -1 24.02 0.62
 2 4 0 14.58 0.55
 2 4 0 15.12 0.35
 2 4 0 14.93 0.53
 2 4 0 13.45 0.52
 2 4 0 14.18 0.5
 2 4 0 13.77 0.56
 2 4 0 14.29 0.34
 -2 -4 0 14.66 0.55
 -2 -4 0 14.45 0.35
 -2 -4 0 14.19 0.52
 -2 -4 0 14.19 0.49
 -2 -4 0 14.02 0.53
 -2 -4 0 13.44 0.5
 -2 -4 0 14.6 0.34
 -2 -4 0 14.28 0.47
 -2 -4 0 14.36 0.48
 -2 -4 0 15 0.5
 2 4 -1 49.46 1.01
 2 4 -1 49.77 0.96
 2 4 -1 48.93 0.79
 2 4 -1 50.22 1.02
 2 4 -1 49.44 0.95
 2 4 -1 49.46 1.11
 2 4 -1 50.73 1.04
 2 4 -1 48.99 1.01
 2 4 -1 50.79 1
 -2 -4 1 49.28 1.02
 -2 -4 1 47.05 1.12
 -2 -4 1 48.48 0.98
 -2 -4 1 48.47 1.02
 -2 -4 1 49.66 0.96
 -2 -4 1 50.64 1.12
 -2 -4 1 48.54 0.79
 -2 -4 1 49.49 0.93
 -2 -4 1 47.5 1
 -2 -4 1 49.67 0.94
 -2 -4 1 50.48 1.02
 2 4 -2 106.16 1.88
 2 4 -2 103.99 1.88
 2 4 -2 104.07 1.88
 2 4 -2 105.91 1.78
 2 4 -2 104.04 1.72
 2 4 -2 102.61 1.83
 2 4 -2 103.17 1.83
 2 4 -2 103.93 2.2
 2 4 -2 102.42 1.72
 -2 -4 2 105.55 1.78
 -2 -4 2 104.82 1.84
 -2 -4 2 106.01 1.88
 -2 -4 2 102.49 2.1
 -2 -4 2 107.66 2.2
 -2 -4 2 104.63 1.72
 2 4 -3 33.23 0.87
 2 4 -3 32.83 0.9
 2 4 -3 32.76 0.95
 2 4 -3 32.13 0.8
 2 4 -3 32.22 0.81
 2 4 -3 32.06 1.03
 2 4 -3 31.69 0.76
 -2 -4 3 32.76 0.75
 -2 -4 3 31.83 0.99
 -2 -4 3 34 0.87
 -2 -4 3 33 0.95
 -2 -4 3 31.82 0.8
 -2 -4 3 32.1 1.03
 2 4 -4 8.28 0.6
 2 4 -4 9.13 0.56
 2 4 -4 10.43 0.65
 2 4 -4 7.99 0.76
 2 4 -4 8.76 0.42
 2 4 -4 8.47 0.58
 -2 -4 4 9.11 0.42
 -2 -4 4 8.77 0.7
 -2 -4 4 8.55 0.58
 -2 -4 4 9.39 0.64
 2 4 -5 29.92 1.28
 2 4 -5 28.94 0.69
 2 4 -5 27.91 0.94
 2 4 -5 30.26 1
 2 4 -5 30.15 1.09
 2 4 -5 29.74 1
 -2 -4 5 29.59 1.05
 -2 -4 5 30.61 0.99
 -2 -4 5 29.38 0.72
 -2 -4 5 30.14 1.12
 2 4 -6 14.9 0.84
 2 4 -6 15.61 0.89
 2 4 -6 16.1 0.92
 2 4 -6 14.82 1.26
 2 4 -6 14.87 0.92
 -2 -4 6 12.59 1
 -2 -4 6 14.64 0.83
 -2 -4 6 15.39 0.9
 -2 -4 6 13.81 0.93
 -2 -4 6 14.69 0.52
 2 4 -7 -0.94 0.58
 2 4 -7 -0.76 0.67
 2 4 -7 -0.2 0.55
 2 4 -7 -0.74 0.44
 2 4 -7 1.04 0.63
 -2 -4 7 -0.42 0.46
 -2 -4 7 -0.67 0.55
 -2 -4 7 -0.79 0.54
 2 4 -8 -0.7 0.8
 2 4 -8 -0.69 0.75
 2 4 -8 0.08 0.55
 2 4 -8 -1.14 0.9
 2 4 -8 0.62 0.7
 -2 -4 8 0.51 0.76
 -2 -4 8 0.86 0.77
 -2 -4 8 -1.04 0.53
 -2 -4 8 -0.18 0.77
 2 4 -9 -0.24 1.01
 2 4 -9 0.65 1.09
 2 4 -9 2.3 1.03
 2 4 -9 -0.21 1.32
 2 4 -9 1.09 0.99
 -2 -4 9 0.37 1.13
 -2 -4 9 -0.06 1.09
 -2 -4 9 1.96 1.07
 3 4 8 -0.33 0.85
 3 4 8 0.24 0.63
 3 4 8 1.06 0.64
 3 4 8 0.16 0.62
 3 4 8 0.75 0.84
 3 4 8 0.2 0.66
 -3 -4 -8 -1.32 0.65
 -3 -4 -8 -1.27 0.87
 -3 -4 -8 -1.11 0.84
 -3 -4 -8 2.55 0.7
 3 4 7 0.3 0.44
 3 4 7 -0.01 0.69
 3 4 7 -0.12 0.46
 3 4 7 0.21 0.52
 3 4 7 0.72 0.63
 3 4 7 -0.07 0.51
 -3 -4 -7 -0.39 0.51
 -3 -4 -7 0.41 0.65
 -3 -4 -7 0.14 0.68
 -3 -4 -7 0.71 0.53
 3 4 6 0.3 0.43
 3 4 6 0.82 0.53
 3 4 6 0.58 0.43
 3 4 6 -0.09 0.34
 3 4 6 0.56 0.48
 3 4 6 -0.61 0.41
 -3 -4 -6 -0.34 0.46
 -3 -4 -6 -0.14 0.59
 -3 -4 -6 0.17 0.5
 -3 -4 -6 -0.05 0.46
 3 4 5 15.27 0.8
 3 4 5 15.41 0.83
 3 4 5 13.71 0.82
 3 4 5 12.26 0.82
 3 4 5 16.13 0.87
 -3 -4 -5 15.29 0.59
 -3 -4 -5 14.5 0.83
 -3 -4 -5 14.09 0.86
 -3 -4 -5 14.96 0.83
 -3 -4 -5 17.62 0.91
 3 4 4 5.19 0.56
 3 4 4 4.84 0.55
 3 4 4 6.12 0.59
 3 4 4 5.15 0.51
 3 4 4 5.28 0.61
 -3 -4 -4 4.54 0.57
 -3 -4 -4 5.2 0.62
 -3 -4 -4 5.83 0.6
 -3 -4 -4 4.94 0.39
 -3 -4 -4 5.74 0.45
 -3 -4 -4 4.98 0.55
 3 4 3 -0.07 0.28
 3 4 3 0.01 0.31
 3 4 3 0.19 0.25
 3 4 3 0.24 0.32
 3 4 3 -0.29 0.29
 -3 -4 -3 0.19 0.24
 -3 -4 -3 0.26 0.32
 -3 -4 -3 -0.38 0.29
 -3 -4 -3 -0.2 0.24
 -3 -4 -3 0.07 0.32
 3 4 1 11.29 0.57
 3 4 1 10.4 0.48
 3 4 1 10.96 0.51
 3 4 1 11.39 0.55
 3 4 1 10.3 0.52
 -3 -4 -1 11.09 0.56
 -3 -4 -1 11.39 0.28
 -3 -4 -1 10.85 0.56
 -3 -4 -1 11 0.33
 -3 -4 -1 10.78 0.54
 -3 -4 -1 10.3 0.47
 -3 -4 -1 10.48 0.48
 3 4 0 39.47 0.92
 3 4 0 39.78 0.77
 3 4 0 40.33 0.95
 3 4 0 40.34 0.76
 3 4 0 39.71 0.93
 3 4 0 38.57 0.9
 3 4 0 39.36 0.9
 3 4 0 41.09 0.87
 3 4 0 40.82 0.94
 -3 -4 0 40.9 0.77
 -3 -4 0 41.89 0.67
 -3 -4 0 39.62 0.94
 -3 -4 0 39.93 0.76
 -3 -4 0 39.52 0.94
 -3 -4 0 42.19 0.93
 -3 -4 0 39.89 0.9
 3 4 -1 36.26 0.76
 3 4 -1 34.97 0.66
 3 4 -1 35.75 0.76
 3 4 -1 35.36 0.87
 3 4 -1 37.29 0.9
 3 4 -1 35.6 0.86
 3 4 -1 36.35 0.88
 3 4 -1 36.61 0.9
 -3 -4 1 36.03 0.86
 -3 -4 1 34.55 0.87
 -3 -4 1 36.36 0.84
 -3 -4 1 36.74 0.89
 -3 -4 1 36.02 0.66
 -3 -4 1 35.67 0.87
 -3 -4 1 36.18 0.77
 -3 -4 1 37.45 0.75
 -3 -4 1 36.04 0.88
 -3 -4 1 34.59 0.81
 -3 -4 1 34.78 0.65
 -3 -4 1 35.01 0.86
 3 4 -2 6.17 0.52
 3 4 -2 5.86 0.42
 3 4 -2 5.87 0.53
 3 4 -2 5.76 0.54
 3 4 -2 6 0.48
 3 4 -2 6.56 0.34
 3 4 -2 5.96 0.42
 3 4 -2 6.26 0.47
 3 4 -2 6.32 0.45
 -3 -4 2 6.11 0.51
 -3 -4 2 4.89 0.53
 -3 -4 2 5.56 0.34
 -3 -4 2 6.33 0.51
 -3 -4 2 6.26 0.43
 -3 -4 2 6.19 0.41
 -3 -4 2 6.2 0.46
 -3 -4 2 5.68 0.38
 3 4 -3 14.7 0.55
 3 4 -3 15.2 0.69
 3 4 -3 13.63 0.57
 3 4 -3 14.92 0.69
 3 4 -3 15.3 0.65
 3 4 -3 13.82 0.67
 3 4 -3 14.36 0.67
 -3 -4 3 14.37 0.76
 -3 -4 3 13.79 0.5
 -3 -4 3 14.68 0.68
 -3 -4 3 14.17 0.63
 -3 -4 3 14.38 0.55
 3 4 -4 44.74 1.12
 3 4 -4 42.78 1
 3 4 -4 44.53 1.34
 3 4 -4 46.47 1.19
 3 4 -4 43.25 1.07
 3 4 -4 43.44 1.19
 3 4 -4 42.44 1.07
 -3 -4 4 44.12 1.3
 -3 -4 4 44.04 1.07
 -3 -4 4 45.83 1.23
 -3 -4 4 43.57 0.92
 -3 -4 4 44.22 1.1
 3 4 -5 1.66 0.48
 3 4 -5 1.61 0.4
 3 4 -5 2.03 0.44
 3 4 -5 2.6 0.43
 3 4 -5 1.85 0.41
 3 4 -5 1.56 0.3
 3 4 -5 2.02 0.44
 -3 -4 5 2.05 0.24
 -3 -4 5 2.56 0.45
 -3 -4 5 1.74 0.48
 -3 -4 5 1.7 0.43
 3 4 -6 1.3 0.47
 3 4 -6 1.49 0.31
 3 4 -6 0.8 0.46
 3 4 -6 2.06 0.47
 3 4 -6 1.66 0.61
 3 4 -6 1.39 0.52
 3 4 -6 1.69 0.54
 -3 -4 6 1.38 0.5
 -3 -4 6 0.73 0.46
 -3 -4 6 1.66 0.55
 3 4 -7 3.13 0.68
 3 4 -7 3.39 0.59
 3 4 -7 2.78 0.62
 3 4 -7 2.07 0.65
 3 4 -7 2.28 0.55
 3 4 -7 1.39 0.76
 -3 -4 7 1.97 0.66
 -3 -4 7 2.5 0.72
 -3 -4 7 2.47 0.57
 -3 -4 7 2.43 0.67
 3 4 -8 1.57 0.61
 3 4 -8 1.69 0.61
 3 4 -8 1.21 0.73
 3 4 -8 0.28 0.97
 3 4 -8 1.16 0.8
 3 4 -8 1.55 0.87
 -3 -4 8 0.39 0.81
 -3 -4 8 0.44 0.75
 -3 -4 8 1.4 0.62
 3 4 -9 0.82 0.99
 3 4 -9 1.51 1.09
 3 4 -9 1.8 1.02
 3 4 -9 0.26 1.35
 3 4 -9 4.17 1.12
 -3 -4 9 1.49 1.14
 -3 -4 9 1.72 1
 -3 -4 9 0.34 1.09
 4 4 8 2.94 0.79
 4 4 8 3.08 0.73
 4 4 8 3.3 0.74
 4 4 8 2.93 1.01
 4 4 8 2.27 0.54
 4 4 8 2.11 0.96
 -4 -4 -8 2.63 1.02
 -4 -4 -8 3.38 0.66
 -4 -4 -8 4.5 0.76
 4 4 7 3.99 0.65
 4 4 7 2.53 0.61
 4 4 7 2.21 0.71
 4 4 7 3.56 0.83
 4 4 7 2.67 0.43
 4 4 7 2.3 0.64
 -4 -4 -7 2.28 0.75
 -4 -4 -7 2.97 0.69
 -4 -4 -7 2.32 0.81
 -4 -4 -7 3.47 0.66
 4 4 6 4.33 0.49
 4 4 6 3.11 0.61
 4 4 6 3.95 0.59
 4 4 6 3.43 0.59
 4 4 6 4.41 0.65
 4 4 6 4.72 0.64
 -4 -4 -6 4.21 0.65
 -4 -4 -6 3.13 0.66
 -4 -4 -6 2.92 0.7
 -4 -4 -6 4.35 0.64
 -4 -4 -6 3.82 0.42
 -4 -4 -6 3.83 0.59
 4 4 5 16.14 0.9
 4 4 5 15.31 0.86
 4 4 5 14.52 0.49
 4 4 5 15.74 0.85
 4 4 5 14.95 0.88
 4 4 5 16.3 0.88
 -4 -4 -5 14.27 0.84
 -4 -4 -5 15.24 0.83
 -4 -4 -5 16.78 0.92
 -4 -4 -5 15.84 0.66
 -4 -4 -5 15.78 1.28
 -4 -4 -5 15.83 0.87
 4 4 4 6 0.58
 4 4 4 4.95 0.21
 4 4 4 5.41 0.58
 4 4 4 5.54 0.62
 4 4 4 6.92 0.65
 4 4 4 5.39 0.6
 -4 -4 -4 5.96 0.61
 -4 -4 -4 5.94 0.59
 -4 -4 -4 6.47 0.57
 -4 -4 -4 5.74 0.58
 4 4 3 56.28 1.32
 4 4 3 58.08 1.18
 4 4 3 54.96 1.31
 4 4 3 55.69 1.33
 4 4 3 58.39 1.37
 -4 -4 -3 58.1 1.35
 -4 -4 -3 55.46 1.22
 -4 -4 -3 56.06 1.32
 -4 -4 -3 57.65 1.34
 -4 -4 -3 57.78 1.37
 -4 -4 -3 57.12 1.17
 4 4 2 7.06 0.53
 4 4 2 7.96 0.37
 4 4 2 6.8 0.57
 4 4 2 7.67 0.55
 4 4 2 6.78 0.53
 4 4 2 8.26 0.5
 -4 -4 -2 7.78 0.35
 -4 -4 -2 7.77 0.58
 -4 -4 -2 7.39 0.55
 -4 -4 -2 8.13 0.53
 -4 -4 -2 7.44 0.53
 -4 -4 -2 7.96 0.58
 4 4 1 0.89 0.26
 4 4 1 0.46 0.3
 4 4 1 1.04 0.31
 4 4 1 0.65 0.27
 4 4 1 0.65 0.33
 -4 -4 -1 0.96 0.31
 -4 -4 -1 0.61 0.31
 -4 -4 -1 1.01 0.16
 -4 -4 -1 0.66 0.26
 -4 -4 -1 0.95 0.32
 -4 -4 -1 1 0.28
 -4 -4 -1 0.75 0.3
 4 4 0 15.74 0.68
 4 4 0 16.83 0.52
 4 4 0 15.96 0.64
 4 4 0 15.38 0.49
 4 4 0 16.5 0.64
 4 4 0 15.48 0.59
 4 4 0 16.6 0.67
 4 4 0 15.96 0.32
 -4 -4 0 16.24 0.67
 -4 -4 0 16 0.63
 -4 -4 0 15.52 0.62
 -4 -4 0 16.3 0.5
 -4 -4 0 15.92 0.51
 -4 -4 0 17.12 0.68
 4 4 -1 4.29 0.53
 4 4 -1 4.21 0.38
 4 4 -1 4.33 0.34
 4 4 -1 4.96 0.47
 4 4 -1 4.5 0.32
 4 4 -1 4.22 0.53
 4 4 -1 4.72 0.33
 4 4 -1 4.47 0.48
 -4 -4 1 4.59 0.41
 -4 -4 1 4.25 0.3
 -4 -4 1 4.99 0.31
 -4 -4 1 4.82 0.33
 -4 -4 1 4.21 0.53
 -4 -4 1 4.83 0.54
 -4 -4 1 5.16 0.32
 -4 -4 1 4.18 0.5
 -4 -4 1 4.59 0.49
 4 4 -2 8.27 0.5
 4 4 -2 8.83 0.52
 4 4 -2 8.63 0.54
 4 4 -2 9.11 0.55
 4 4 -2 8.43 0.49
 4 4 -2 8.5 0.4
 4 4 -2 8.59 0.38
 4 4 -2 8.3 0.6
 -4 -4 2 9.49 0.5
 -4 -4 2 8.53 0.39
 -4 -4 2 7.93 0.37
 -4 -4 2 8.17 0.39
 -4 -4 2 8.71 0.41
 -4 -4 2 7.95 0.51
 -4 -4 2 8.73 0.51
 4 4 -3 14.37 0.71
 4 4 -3 13.86 0.6
 4 4 -3 13.64 0.71
 4 4 -3 13.24 0.64
 4 4 -3 13.74 0.64
 4 4 -3 14.26 0.64
 4 4 -3 13.5 0.54
 -4 -4 3 13.42 0.54
 -4 -4 3 14.25 0.67
 -4 -4 3 13.46 0.49
 -4 -4 3 12.96 0.76
 -4 -4 3 13.32 0.65
 4 4 -4 0.74 0.32
 4 4 -4 0.7 0.31
 4 4 -4 0.42 0.36
 4 4 -4 0.5 0.32
 4 4 -4 0.6 0.35
 4 4 -4 0.51 0.34
 -4 -4 4 0.44 0.33
 -4 -4 4 0.58 0.31
 -4 -4 4 0.52 0.39
 -4 -4 4 0.28 0.34
 4 4 -5 -0.22 0.38
 4 4 -5 0.1 0.37
 4 4 -5 0.36 0.41
 4 4 -5 -0.02 0.33
 4 4 -5 0.39 0.37
 4 4 -5 0.01 0.35
 4 4 -5 0.31 0.38
 -4 -4 5 0.61 0.41
 -4 -4 5 0.32 0.38
 -4 -4 5 -0.09 0.38
 4 4 -6 2.62 0.41
 4 4 -6 2.17 0.59
 4 4 -6 2.14 0.49
 4 4 -6 2.41 0.54
 4 4 -6 2.75 0.55
 4 4 -6 3.09 0.54
 4 4 -6 2.07 0.51
 -4 -4 6 3.03 0.56
 -4 -4 6 1.89 0.56
 -4 -4 6 1.58 0.56
 4 4 -7 18.88 0.73
 4 4 -7 18.56 1.09
 4 4 -7 16.96 1.55
 4 4 -7 17.06 1.16
 4 4 -7 19.46 1.12
 4 4 -7 17.44 1.06
 4 4 -7 18.96 1.14
 -4 -4 7 17.62 1.28
 -4 -4 7 17.38 1.11
 -4 -4 7 17.9 1.15
 4 4 -8 1.22 0.79
 4 4 -8 1.19 0.75
 4 4 -8 -0.22 0.93
 4 4 -8 0.35 0.54
 4 4 -8 0.55 0.83
 4 4 -8 0.28 0.64
 -4 -4 8 -0.22 0.82
 -4 -4 8 0.69 0.75
 -4 -4 8 1.18 0.83
 -4 -4 8 1.57 0.6
 4 4 -9 0.63 1.35
 4 4 -9 2.88 1.18
 4 4 -9 0.43 1.12
 4 4 -9 -0.28 1.03
 4 4 -9 1.19 1.05
 -4 -4 9 1.58 1.1
 -4 -4 9 0.06 1.08
 -4 -4 9 -0.42 1.1
 5 4 8 -0.84 1.02
 5 4 8 -0.13 1
 5 4 8 -0.12 0.86
 -5 -4 -8 0.23 1.01
 5 4 7 12.79 0.95
 5 4 7 9.92 1.03
 5 4 7 14.97 1.03
 5 4 7 9.77 1.2
 5 4 7 9.37 1.19
 -5 -4 -7 11.27 0.98
 -5 -4 -7 11.91 1.21
 -5 -4 -7 10.95 1.3
 -5 -4 -7 9.1 1.02
 -5 -4 -7 10.64 1.49
 5 4 6 15.29 1.1
 5 4 6 15.04 1.07
 5 4 6 14.56 0.96
[truncated: 1,583,121 more chars]
